# Supplementary material for: Transcriptome Analysis Reveals Increases in Visceral Lipogenesis and Storage and Activation of the Antigen Processing and Presentation Pathway during the Mouth-Opening Stage in Zebrafish Larvae
Source: MDPI journal article supplement (doi:10.3390/ijms18081634), 2017-07-31
Supplement: s1 [file s1]

Table S4 KEGG pathways with high representation of the DEGs

| Pathways                              | All_<br>profiles | Profile<br>0 | Profile<br>1 | Profile<br>3 | Profile<br>4 | Profile<br>6 | Profile<br>7 | Pathway<br>ID |
|---------------------------------------|------------------|--------------|--------------|--------------|--------------|--------------|--------------|---------------|
| Antigen processing and presentation   | 23               | 2            | 0            | 1            | 4            | 5            | 8            | ko04612       |
| Arachidonic acid metabolism           | 19               | 1            | 2            | 1            | 2            | 10           | 3            | ko00590       |
| Metabolic pathways                    | 246              | 59           | 26           | 37           | 17           | 38           | 51           | ko01100       |
| Cell cycle                            | 32               | 9            | 2            | 19           | 0            | 1            | 1            | ko04110       |
| Linoleic acid metabolism              | 10               | 0            | 0            | 1            | 3            | 4            | 2            | ko00591       |
| Homologous recombination              | 13               | 4            | 0            | 8            | 0            | 0            | 0            | ko03440       |
| Fat digestion and absorption          | 19               | 0            | 0            | 1            | 2            | 6            | 8            | ko04975       |
| Arginine and proline metabolism       | 24               | 4            | 1            | 3            | 3            | 5            | 5            | ko00330       |
| Glutathione metabolism                | 18               | 3            | 1            | 6            | 0            | 3            | 3            | ko00480       |
| alpha-Linolenic acid metabolism       | 8                | 0            | 0            | 0            | 1            | 2            | 5            | ko00592       |
| Protein digestion and absorption      | 17               | 1            | 0            | 10           | 2            | 1            | 2            | ko04974       |
| Purine metabolism                     | 43               | 15           | 10           | 7            | 0            | 4            | 3            | ko00230       |
| Fatty acid metabolism                 | 10               | 5            | 0            | 2            | 0            | 1            | 2            | ko00071       |
| PPAR signaling pathway                | 21               | 1            | 0            | 4            | 0            | 4            | 9            | ko03320       |
| Galactose metabolism                  | 12               | 2            | 1            | 0            | 2            | 3            | 4            | ko00052       |
| Peroxisome                            | 25               | 1            | 3            | 3            | 2            | 8            | 7            | ko04146       |
| Proteasome                            | 17               | 8            | 2            | 0            | 0            | 1            | 4            | ko03050       |
| Pentose phosphate pathway             | 12               | 2            | 2            | 0            | 1            | 1            | 4            | ko00030       |
| Tyrosine metabolism                   | 11               | 1            | 1            | 2            | 0            | 0            | 6            | ko00350       |
| Circadian rhythm-fly                  | 6                | 0            | 0            | 1            | 1            | 0            | 0            | ko04711       |
| Steroid biosynthesis                  | 11               | 2            | 0            | 0            | 0            | 2            | 3            | ko00100       |
| Histidine metabolism                  | 9                | 1            | 0            | 2            | 0            | 2            | 4            | ko00340       |
| p53 signaling pathway                 | 21               | 7            | 1            | 10           | 1            | 2            | 0            | ko04115       |
| Bile secretion                        | 19               | 4            | 1            | 1            | 2            | 3            | 4            | ko04976       |
| ECM-receptor interaction              | 19               | 5            | 0            | 12           | 0            | 0            | 1            | ko04512       |
| Drug metabolism-cytochrome P450       | 12               | 1            | 1            | 1            | 1            | 3            | 4            | ko00982       |
| Starch and sucrose metabolism         | 12               | 3            | 1            | 1            | 3            | 3            | 1            | ko00500       |
| Terpenoid backbone biosynthesis       | 8                | 0            | 3            | 4            | 0            | 0            | 0            | ko00900       |
| Base excision repair                  | 11               | 6            | 2            | 2            | 1            | 0            | 0            | ko03410       |
| Ribosome biogenesis in eukaryotes     | 20               | 1            | 2            | 0            | 6            | 0            | 1            | ko03008       |
| ABC transporters                      | 11               | 0            | 1            | 0            | 1            | 3            | 6            | ko02010       |
| Folate biosynthesis                   | 7                | 2            | 1            | 0            | 0            | 1            | 2            | ko00790       |
| Circadian rhythm-mammal               | 7                | 1            | 0            | 1            | 1            | 0            | 0            | ko04710       |
| Drug metabolism-other enzymes         | 11               | 2            | 2            | 1            | 1            | 2            | 2            | ko00983       |
| Carbohydrate digestion and absorption | 14               | 1            | 2            | 2            | 3            | 3            | 3            | ko04973       |
| Fructose and mannose metabolism       | 10               | 1            | 1            | 1            | 2            | 1            | 4            | ko00051       |
