# Supplementary material for: Transcriptome Analysis Reveals Increases in Visceral Lipogenesis and Storage and Activation of the Antigen Processing and Presentation Pathway during the Mouth-Opening Stage in Zebrafish Larvae
Source: MDPI journal article supplement (doi:10.3390/ijms18081634), 2017-07-31
Supplement: s1 [file s1]

Table S6 Differentially expressed genes related to the antigen processing and presentation pathways

| Gene name    | Gene ID            | Description                                | Fold -change | <i>p</i> -value |
|--------------|--------------------|--------------------------------------------|--------------|-----------------|
| <i>mhc1</i>  | CL4289.Contig2_All | major histocompatibility complex, class I  | -1.1758      | 3.22E-92        |
| <i>mhc2</i>  | Unigene8098_All    | MHC class II antigen alpha chain, class II | 1.0466       | 5.83E-09        |
| <i>hsp27</i> | CL4186.Contig2_All | Heat shock 27kDa protein                   | 3.9285       | 2.09E-30        |
| <i>hsp70</i> | Unigene6318_All    | Heat shock 70kDa protein                   | 3.7239       | 2.05E-11        |
| <i>b2m</i>   | CL695.Contig1_All  | Beta-2-microglobulin                       | 1.2273       | 3.22E-24        |
| <i>tap1</i>  | Unigene30122_All   | Transporter of antigen presentation        | 1.6031       | 3.90E-06        |
| <i>ctsb</i>  | Unigene4878_All    | Cathepsin b                                | -1.006       | 9.39E-82        |
| <i>ctse</i>  | Unigene1543_All    | Cathepsin E                                | 3.6175       | 3.22E-24        |
| <i>ctsf</i>  | Unigene26177_All   | Cathepsin F                                | 1.9778       | 2.66E-76        |

The data are from the research of Qian et al. 2015 that the large yellow croakers at 21 days after fasting. Identification of all differentially expressed genes was based on  $P < 0.05$ . A  $P$  value  $< 0.05$  indicated that the gene was significantly altered in fasting fish relative to that observed in normal feeding fish. The absolute value of “Fold-change” is the magnitude of up- or downregulation for each gene after fasting. “+” indicates upregulation and “-” indicates downregulation.

Qian, B.; Xue, L.; Huang, H. Liver transcriptome analysis of the Large yellow croaker (*Larimichthys crocea*) during fasting by using RNA-seq. *PLoS ONE* **2016**, *11*, doi:10.1371/journal.pone.0150240.
