# Supplementary material for: Transcriptome Analysis Reveals Increases in Visceral Lipogenesis and Storage and Activation of the Antigen Processing and Presentation Pathway during the Mouth-Opening Stage in Zebrafish Larvae
Source: MDPI journal article supplement (doi:10.3390/ijms18081634), 2017-07-31
Supplement: s1 [file s1]

Table S5 Primer sequences of the candidate genes and reference gene for qRT-PCR

| Gene name         | Accession number   | Forward primer (5'→3')  | Reverse primer (5'→3')  |
|-------------------|--------------------|-------------------------|-------------------------|
| <i>psme1</i>      | ENSDARG00000002165 | GAAAATCACCAAGGAGGCTG    | TCTTTCTTTCCCTCTTTGGC    |
| <i>hsp90aa1.1</i> | ENSDARG00000010478 | AAACAGAGAGAAAAAGAGGTGGA | CTCAAAAAGGTCAAAAGCGG    |
| <i>tap1</i>       | ENSDARG00000079766 | GTGGGGTTGGCACTCTTG      | ACAAAGAAGAAGACGGCTGC    |
| <i>mhc1zba</i>    | ENSDARG00000036588 | AGTGT GTGGACTGGCTCAAC   | CAGGCAGTGTAAATGCGGTA    |
| <i>lgmn</i>       | ENSDARG00000039150 | CAGTGGAGCCAGTGTCTGTTG   | GAGCGTGGATTTTCATTCAGGTA |
| <i>cd74a</i>      | ENSDARG00000009087 | GCCCCATTTACTCCAACCAG    | GCCTCACCTCACGCTCAGAC    |
| <i>ctssb</i>      | ENSDARG00000101051 | TGTGGATTCGGCTGTTCTG     | CCTGTTTGTAGGGGACGCT     |
| <i>mhc2dab</i>    | ENSDARG00000079105 | GTGGGGAAGTTTGTGGGGTA    | CTGCCTTCAGCCTGCCTC      |
| <i>actb2</i>      | ENSDARG00000037870 | GCATCACACCTTCTACAACGA   | CAGAGTCCATCACGATACCAGT  |
