# Supplementary material for: Transcriptome Analysis Reveals Increases in Visceral Lipogenesis and Storage and Activation of the Antigen Processing and Presentation Pathway during the Mouth-Opening Stage in Zebrafish Larvae
Source: MDPI journal article supplement (doi:10.3390/ijms18081634), 2017-07-31
Supplement: s1 [file s1]

Table S1 GO-BP enrichment analysis for the non-detected genes during the mouth-opening stage

| Gene Ontology term                                            | Cluster frequency           | Genome frequency of use        | P-value  | Corrected P-value |
|---------------------------------------------------------------|-----------------------------|--------------------------------|----------|-------------------|
| neurological system process                                   | 88 out of 250 genes, 35.2%  | 318 out of 10793 genes, 2.9%   | 1.96E-73 | 9.23E-71          |
| system process                                                | 90 out of 250 genes, 36.0%  | 444 out of 10793 genes, 4.1%   | 3.7E-62  | 1.73E-59          |
| sensory perception of chemical stimulus                       | 53 out of 250 genes, 21.2%  | 149 out of 10793 genes, 1.4%   | 1E-49    | 4.7E-47           |
| sensory perception of smell                                   | 42 out of 250 genes, 16.8%  | 97 out of 10793 genes, 0.9%    | 1.1E-43  | 5.2E-41           |
| sensory perception                                            | 53 out of 250 genes, 21.2%  | 212 out of 10793 genes, 2.0%   | 1.31E-40 | 6.18E-38          |
| detection of chemical stimulus involved in sensory perception | 36 out of 250 genes, 14.4%  | 84 out of 10793 genes, 0.8%    | 2.85E-37 | 1.33E-34          |
| detection of chemical stimulus                                | 36 out of 250 genes, 14.4%  | 87 out of 10793 genes, 0.8%    | 1.37E-36 | 6.42E-34          |
| G-protein coupled receptor signaling pathway                  | 65 out of 250 genes, 26.0%  | 436 out of 10793 genes, 4.0%   | 3.06E-35 | 1.43E-32          |
| detection of stimulus involved in sensory perception          | 36 out of 250 genes, 14.4%  | 98 out of 10793 genes, 0.9%    | 2.43E-34 | 1.14E-31          |
| detection of stimulus                                         | 37 out of 250 genes, 14.8%  | 119 out of 10793 genes, 1.1%   | 3.47E-32 | 1.63E-29          |
| signal transduction                                           | 124 out of 250 genes, 49.6% | 1890 out of 10793 genes, 17.5% | 5.97E-32 | 2.8E-29           |
| single organism signaling                                     | 125 out of 250 genes, 50.0% | 1997 out of 10793 genes, 18.5% | 3.29E-30 | 1.54E-27          |
| signaling                                                     | 125 out of 250 genes, 50.0% | 1999 out of 10793 genes, 18.5% | 3.64E-30 | 1.7E-27           |
| response to stimulus                                          | 146 out of 250 genes, 58.4% | 2688 out of 10793 genes, 24.9% | 4.9E-30  | 2.29E-27          |
| cell communication                                            | 125 out of 250 genes, 50.0% | 2062 out of 10793 genes, 19.1% | 8.15E-29 | 3.82E-26          |
| cellular response to stimulus                                 | 125 out of 250 genes, 50.0% | 2180 out of 10793 genes, 20.2% | 1.94E-26 | 9.13E-24          |
| cell surface receptor signaling pathway                       | 67 out of 250 genes, 26.8%  | 764 out of 10793 genes, 7.1%   | 2.03E-22 | 9.55E-20          |
| regulation of cellular process                                | 139 out of 250 genes, 55.6% | 3216 out of 10793 genes, 29.8% | 7.98E-18 | 3.74E-15          |
| biological regulation                                         | 148 out of 250 genes, 59.2% | 3578 out of 10793 genes, 33.2% | 1.24E-17 | 5.85E-15          |
| regulation of biological process                              | 139 out of 250 genes, 55.6% | 3303 out of 10793 genes, 30.6% | 9.92E-17 | 4.65E-14          |
| single-multicellular organism process                         | 98 out of 250 genes, 39.2%  | 1991 out of 10793 genes, 18.4% | 6.78E-15 | 3.18E-12          |
| multicellular organismal process                              | 98 out of 250 genes, 39.2%  | 2005 out of 10793 genes, 18.6% | 1.08E-14 | 5.06E-12          |
| cellular process                                              | 200 out of 250 genes, 80.0% | 6497 out of 10793 genes, 60.2% | 1.07E-11 | 5.02E-09          |
| response to chemical                                          | 40 out of 250 genes, 16.0%  | 529 out of 10793 genes, 4.9%   | 2.48E-11 | 1.16E-08          |
| positive regulation of adenylate cyclase activity             | 10 out of 250 genes, 4.0%   | 32 out of 10793 genes, 0.3%    | 1.53E-09 | 0.000000718       |
| positive regulation of cAMP metabolic process                 | 10 out of 250 genes, 4.0%   | 33 out of 10793 genes, 0.3%    | 2.15E-09 | 0.0000001         |
| positive regulation of cAMP biosynthetic process              | 10 out of 250 genes, 4.0%   | 33 out of 10793 genes, 0.3%    | 2.15E-09 | 0.0000001         |
| regulation of adenylate cyclase activity                      | 10 out of 250 genes, 4.0%   | 37 out of 10793 genes, 0.3%    | 7.46E-09 | 0.00000035        |
| regulation of cAMP metabolic process                          | 10 out of 250 genes, 4.0%   | 38 out of 10793 genes, 0.4%    | 9.93E-09 | 0.000000465       |
| regulation of cAMP biosynthetic process                       | 10 out of 250 genes, 4.0%   | 38 out of 10793 genes, 0.4%    | 9.93E-09 | 0.000000465       |
| positive regulation of cyclase activity                       | 10 out of 250 genes, 4.0%   | 38 out of 10793 genes, 0.4%    | 9.93E-09 | 0.000000465       |
| positive regulation of lyase activity                         | 10 out of 250 genes, 4.0%   | 38 out of 10793 genes, 0.4%    | 9.93E-09 | 0.000000465       |
| positive regulation of cyclic nucleotide metabolic process    | 10 out of 250 genes, 4.0%   | 39 out of 10793 genes, 0.4%    | 1.3E-08  | 0.000000613       |
| positive regulation of cyclic nucleotide biosynthetic process | 10 out of 250 genes, 4.0%   | 39 out of 10793 genes, 0.4%    | 1.3E-08  | 0.000000613       |
| positive regulation of nucleotide biosynthetic process        | 10 out of 250 genes, 4.0%   | 39 out of 10793 genes, 0.4%    | 1.3E-08  | 0.000000613       |
| positive regulation of nucleotide metabolic process           | 10 out of 250 genes, 4.0%   | 39 out of 10793 genes, 0.4%    | 1.3E-08  | 0.000000613       |
| positive regulation of purine nucleotide biosynthetic process | 10 out of 250 genes, 4.0%   | 39 out of 10793 genes, 0.4%    | 1.3E-08  | 0.000000613       |
| positive regulation of purine nucleotide metabolic process    | 10 out of 250 genes, 4.0%   | 39 out of 10793 genes, 0.4%    | 1.3E-08  | 0.000000613       |
| regulation of cyclase activity                                | 10 out of 250 genes, 4.0%   | 43 out of 10793 genes, 0.4%    | 3.63E-08 | 0.00000017        |
| regulation of lyase activity                                  | 10 out of 250 genes, 4.0%   | 43 out of 10793 genes, 0.4%    | 3.63E-08 | 0.00000017        |
| regulation of nucleotide metabolic process                    | 10 out of 250 genes, 4.0%   | 44 out of 10793 genes, 0.4%    | 4.61E-08 | 0.000000216       |
| regulation of cyclic nucleotide metabolic process             | 10 out of 250 genes, 4.0%   | 44 out of 10793 genes, 0.4%    | 4.61E-08 | 0.000000216       |

|                                                            |                            |                                |           |           |
|------------------------------------------------------------|----------------------------|--------------------------------|-----------|-----------|
| regulation of cyclic nucleotide biosynthetic process       | 10 out of 250 genes, 4.0%  | 44 out of 10793 genes, 0.4%    | 4.61E-08  | 0.0000216 |
| regulation of nucleotide biosynthetic process              | 10 out of 250 genes, 4.0%  | 44 out of 10793 genes, 0.4%    | 4.61E-08  | 0.0000216 |
| regulation of purine nucleotide biosynthetic process       | 10 out of 250 genes, 4.0%  | 44 out of 10793 genes, 0.4%    | 4.61E-08  | 0.0000216 |
| regulation of purine nucleotide metabolic process          | 10 out of 250 genes, 4.0%  | 44 out of 10793 genes, 0.4%    | 4.61E-08  | 0.0000216 |
| cellular protein modification process                      | 54 out of 250 genes, 21.6% | 1153 out of 10793 genes, 10.7% | 2.8E-07   | 0.00013   |
| protein modification process                               | 54 out of 250 genes, 21.6% | 1153 out of 10793 genes, 10.7% | 2.8E-07   | 0.00013   |
| defense response to bacterium                              | 10 out of 250 genes, 4.0%  | 53 out of 10793 genes, 0.5%    | 3.01E-07  | 0.00014   |
| macromolecule modification                                 | 54 out of 250 genes, 21.6% | 1183 out of 10793 genes, 11.0% | 6.39E-07  | 0.00029   |
| immune response                                            | 17 out of 250 genes, 6.8%  | 178 out of 10793 genes, 1.6%   | 7.66E-07  | 0.00035   |
| positive regulation of phosphorus metabolic process        | 12 out of 250 genes, 4.8%  | 96 out of 10793 genes, 0.9%    | 2.04E-06  | 0.00095   |
| positive regulation of phosphate metabolic process         | 12 out of 250 genes, 4.8%  | 96 out of 10793 genes, 0.9%    | 2.04E-06  | 0.00095   |
| defense response to other organism                         | 10 out of 250 genes, 4.0%  | 65 out of 10793 genes, 0.6%    | 2.17E-06  | 0.00101   |
| regulation of mitotic cell cycle                           | 9 out of 250 genes, 3.6%   | 54 out of 10793 genes, 0.5%    | 3.55E-06  | 0.00166   |
| protein autophosphorylation                                | 9 out of 250 genes, 3.6%   | 54 out of 10793 genes, 0.5%    | 3.55E-06  | 0.00166   |
| membrane disruption in other organism                      | 7 out of 250 genes, 2.8%   | 30 out of 10793 genes, 0.3%    | 4.24E-06  | 0.00199   |
| response to bacterium                                      | 11 out of 250 genes, 4.4%  | 87 out of 10793 genes, 0.8%    | 4.89E-06  | 0.00229   |
| defense response to Gram-positive bacterium                | 7 out of 250 genes, 2.8%   | 32 out of 10793 genes, 0.3%    | 6.74E-06  | 0.00316   |
| modification of morphology or physiology of other organism | 7 out of 250 genes, 2.8%   | 34 out of 10793 genes, 0.3%    | 0.0000103 | 0.00486   |
| immune system process                                      | 27 out of 250 genes, 10.8% | 470 out of 10793 genes, 4.4%   | 0.000012  | 0.00562   |
| response to biotic stimulus                                | 12 out of 250 genes, 4.8%  | 124 out of 10793 genes, 1.1%   | 0.0000293 | 0.01375   |
| positive regulation of catalytic activity                  | 10 out of 250 genes, 4.0%  | 96 out of 10793 genes, 0.9%    | 0.0000729 | 0.0342    |
| nucleosome assembly                                        | 7 out of 250 genes, 2.8%   | 46 out of 10793 genes, 0.4%    | 0.0000813 | 0.03817   |
| chromatin assembly                                         | 7 out of 250 genes, 2.8%   | 46 out of 10793 genes, 0.4%    | 0.0000813 | 0.03817   |
| defense response                                           | 11 out of 250 genes, 4.4%  | 117 out of 10793 genes, 1.1%   | 0.0000822 | 0.03858   |
| negative regulation of apoptotic process                   | 9 out of 250 genes, 3.6%   | 79 out of 10793 genes, 0.7%    | 0.0000832 | 0.03902   |
| response to external biotic stimulus                       | 11 out of 250 genes, 4.4%  | 120 out of 10793 genes, 1.1%   | 0.0001    | 0.04855   |
| response to other organism                                 | 11 out of 250 genes, 4.4%  | 120 out of 10793 genes, 1.1%   | 0.0001    | 0.04855   |
