# Supplementary material for: Transcriptome Analysis Reveals Increases in Visceral Lipogenesis and Storage and Activation of the Antigen Processing and Presentation Pathway during the Mouth-Opening Stage in Zebrafish Larvae
Source: Int J Mol Sci. 2017 Jul 31;18(8):1634. doi: 10.3390/ijms18081634 (PMC5578024; doi:10.3390/ijms18081634)
Supplement: Supplementary file 1 [file ijms-18-01634-s001.zip]

Archive with 7 entries (7 files):
- Table S6.pdf
- Fig. S1.tif
- Table S1.pdf
- Table S2.xlsx
- Table S3.xlsx
- Table S4.pdf
- Table S5.pdf
