# Supplementary material for: Transcriptome Analysis Reveals Increases in Visceral Lipogenesis and Storage and Activation of the Antigen Processing and Presentation Pathway during the Mouth-Opening Stage in Zebrafish Larvae
Source: Int J Mol Sci. 2017 Jul 31;18(8):1634. doi: 10.3390/ijms18081634 (PMC5578024; doi:10.3390/ijms18081634)
Supplement: Supplementary file 1 [file ijms-18-01634-s001.zip › Table S2.xlsx]

## Sheet: Sheet1
Table S2 The DEGs between ENDO and MIX, ENDO and EXO, MIX and EXO
id	ENDO_count	MIX_count	ENDO_fpkm	MIX_fpkm	log2(FC)	Pvalue	FDR	significant	Symbol	Description	Pathway	GO Component	GO Function	GO Process
ENSDARG00000094910	0	154	0.001	57.035	15.7996	1.55805e-32	6.06245e-30	yes	si:dkey-22i16.7	-	-	-	-	-
ENSDARG00000088641	0	69.5	0.001	20.025	14.2895	5.33069e-23	1.15809e-20	yes	grn2	-	-	-	-	-
ENSDARG00000102894	0	7.5	0.001	4.87	12.2497	0.000175068	0.00403183	yes	CABZ01057159.1	-	-	-	-	-
XLOC_028039	0	6.5	0.001	3.145	11.6188	0.00106672	0.0175343	yes	TCONS_00066618	-	-	-	-	-
ENSDARG00000100106	0	9.5	0.001	2.705	11.4014	4.95795e-05	0.00138387	yes	-	-	-	-	-	-
XLOC_007820	0	5.5	0.001	2.205	11.1066	0.00210598	0.0297934	yes	TCONS_00019550	PREDICTED: fibrous sheath CABYR-binding protein-like [Danio rerio]	-	-	-	-
ENSDARG00000040738	0	5.5	0.001	1.94	10.9218	0.00189292	0.0276461	yes	zgc:153846	zgc:153846 [Source:ZFIN;Acc:ZDB-GENE-060929-898]	-	GO:0005575//cellular_component;GO:0005575//cellular_component	GO:0003674//molecular_function;GO:0003674//molecular_function	GO:0008150//biological_process;GO:0008150//biological_process
ENSDARG00000067664	0	7	0.001	1.67	10.7056	0.00111338	0.0181847	yes	si:dkey-172m14.2	-	-	-	-	-
ENSDARG00000038968	0	11	0.001	1.345	10.3934	7.41818e-06	0.0002701	yes	ccr6b	-	ko04062//Chemokine signaling pathway;ko04060//Cytokine-cytokine receptor interaction	GO:0005575//cellular_component	GO:0003674//molecular_function;GO:0004871//signal transducer activity	GO:0008150//biological_process;GO:0040011//locomotion;GO:0002376//immune system process;GO:0007165//signal transduction
ENSDARG00000077911	0	11.5	0.001	1.04	10.0224	2.41749e-06	0.000101162	yes	treh	trehalase (brush-border membrane glycoprotein) [Source:ZFIN;Acc:ZDB-GENE-070912-84]	-	-	GO:0003674//molecular_function;GO:0016798//hydrolase activity, acting on glycosyl bonds;GO:0003674//molecular_function;GO:0016798//hydrolase activity, acting on glycosyl bonds	GO:0008150//biological_process;GO:0005975//carbohydrate metabolic process;GO:0008150//biological_process;GO:0005975//carbohydrate metabolic process
ENSDARG00000076183	0	12	0.001	1.005	9.97298	1.49829e-06	6.59806e-05	yes	frrs1a	ferric-chelate reductase 1a [Source:ZFIN;Acc:ZDB-GENE-070705-45]	-	GO:0005575//cellular_component	-	GO:0006810//transport;GO:0008150//biological_process
ENSDARG00000079221	0	9.5	0.001	0.9	9.81378	2.99402e-05	0.000903405	yes	si:ch211-162k9.6	-	-	-	-	-
ENSDARG00000101990	0	11.5	0.001	0.865	9.75656	6.78631e-05	0.00180714	yes	CU571315.3	-	-	-	-	-
ENSDARG00000093101	0	6.5	0.001	0.74	9.53138	0.00072224	0.0127222	yes	BX005305.6	-	-	-	-	-
ENSDARG00000089383	0	7.5	0.001	0.625	9.28771	0.000346713	0.00711157	yes	il1fma	interleukin-1 family member A [Source:ZFIN;Acc:ZDB-GENE-140106-231]	-	GO:0005615//extracellular space;GO:0005575//cellular_component;GO:0005576//extracellular region	GO:0005125//cytokine activity;GO:0003674//molecular_function	-
ENSDARG00000036833	0	6	0.001	0.495	8.95128	0.00105989	0.0174662	yes	upp2	uridine phosphorylase 2 [Source:ZFIN;Acc:ZDB-GENE-040426-830]	ko01100//Metabolic pathways;ko00240//Pyrimidine metabolism;ko00983//Drug metabolism - other enzymes	GO:0005737//cytoplasm;GO:0005575//cellular_component;GO:0005622//intracellular;GO:0005623//cell	GO:0016740//transferase activity;GO:0004850//uridine phosphorylase activity;GO:0016757//transferase activity, transferring glycosyl groups;GO:0016763//transferase activity, transferring pentosyl groups;GO:0003824//catalytic activity;GO:0003674//molecular_function	GO:0009166//nucleotide catabolic process;GO:0009116//nucleoside metabolic process;GO:0008150//biological_process;GO:0034641//cellular nitrogen compound metabolic process;GO:0044281//small molecule metabolic process;GO:0009056//catabolic process;GO:0034655
ENSDARG00000103696	0	5.5	0.001	0.4	8.64386	0.00231291	0.0319412	yes	CABZ01064968.1	-	-	-	-	-
XLOC_008441	0.5	135	0.05	14.185	8.14822	3.20695e-36	1.54824e-33	yes	TCONS_00020983	-	-	-	-	-
ENSDARG00000096577	0	5.5	0.001	0.23	7.84549	0.00231442	0.0319412	yes	si:dkey-9c18.1	si:dkey-9c18.1 [Source:ZFIN;Acc:ZDB-GENE-121214-61]	-	GO:0005575//cellular_component;GO:0005623//cell;GO:0005886//plasma membrane	GO:0003674//molecular_function;GO:0004871//signal transducer activity	GO:0007165//signal transduction;GO:0008150//biological_process
ENSDARG00000037533	0.5	56	0.03	3.325	6.79225	3.45945e-18	5.63674e-16	yes	mep1b	meprin A, beta [Source:ZFIN;Acc:ZDB-GENE-041014-209]	-	GO:0016020//membrane;GO:0005575//cellular_component	GO:0016787//hydrolase activity;GO:0008233//peptidase activity;GO:0004222//metalloendopeptidase activity;GO:0008237//metallopeptidase activity;GO:0046872//metal ion binding;GO:0008270//zinc ion binding;GO:0003674//molecular_function;GO:0043167//ion binding	GO:0006508//proteolysis;GO:0008150//biological_process
XLOC_000400	1	97.5	0.855	87.015	6.6692	7.52426e-23	1.60785e-20	yes	TCONS_00001139	-	-	-	-	-
ENSDARG00000040282	6.5	549.5	1.34	115.15	6.42514	1.10463e-74	2.39982e-71	yes	zgc:92590	zgc:92590 [Source:ZFIN;Acc:ZDB-GENE-041024-15]	-	GO:0005615//extracellular space;GO:0005575//cellular_component;GO:0005576//extracellular region;GO:0005615//extracellular space	GO:0016787//hydrolase activity;GO:0008236//serine-type peptidase activity;GO:0004252//serine-type endopeptidase activity;GO:0008233//peptidase activity;GO:0003674//molecular_function	GO:0006508//proteolysis;GO:0008150//biological_process
ENSDARG00000029747	4.5	357.5	0.32	25.255	6.30235	1.81818e-57	1.82307e-54	yes	mep1a.1	meprin A, alpha (PABA peptide hydrolase), tandem duplicate 1 [Source:ZFIN;Acc:ZDB-GENE-041001-209]	-	GO:0016020//membrane;GO:0005575//cellular_component	GO:0008237//metallopeptidase activity;GO:0008270//zinc ion binding;GO:0016787//hydrolase activity;GO:0008233//peptidase activity;GO:0004222//metalloendopeptidase activity;GO:0046872//metal ion binding;GO:0003674//molecular_function;GO:0043167//ion binding	GO:0006508//proteolysis;GO:0008150//biological_process
ENSDARG00000031588	12	755.5	0.09	5.695	5.98363	7.87198e-60	8.92271e-57	yes	si:dkey-239b22.1	-	-	-	-	-
ENSDARG00000052779	5.5	331	0.215	13.21	5.94115	5.66337e-50	4.47406e-47	yes	zgc:153932	-	-	-	-	-
ENSDARG00000098995	1.5	82	0.115	5.89	5.67856	1.03037e-22	2.18388e-20	yes	cyp2k6	cytochrome P450, family 2, subfamily K, polypeptide 6 [Source:ZFIN;Acc:ZDB-GENE-040426-1571]	-	GO:0043231//intracellular membrane-bounded organelle;GO:0005737//cytoplasm;GO:0005575//cellular_component;GO:0005622//intracellular;GO:0005623//cell;GO:0005737//cytoplasm;GO:0043226//organelle	GO:0046872//metal ion binding;GO:0016705//oxidoreductase activity, acting on paired donors, with incorporation or reduction of molecular oxygen;GO:0005506//iron ion binding;GO:0008395//steroid hydroxylase activity;GO:0016712//oxidoreductase activity, acting on paired donors, with incorporation or reduction of molecular oxygen, reduced flavin or flavoprotein as one donor, and incorporation of one …	GO:0043390//aflatoxin B1 metabolic process;GO:0006082//organic acid metabolic process;GO:0055114//oxidation-reduction process;GO:0006805//xenobiotic metabolic process;GO:0042738//exogenous drug catabolic process;GO:0008150//biological_process;GO:0009056//catabolic process;GO:0044281//small molecule metabolic process;GO:0019748//secondary metabolic process
ENSDARG00000076313	1	47	0.385	18.67	5.59972	8.36038e-16	1.19756e-13	yes	si:ch211-240l19.7	-	-	-	-	-
ENSDARG00000096445	33	563.5	1.145	53.675	5.55083	5.26476e-49	3.92149e-46	yes	PLB1	phospholipase B1 [Source:HGNC Symbol;Acc:HGNC:30041]	ko01100//Metabolic pathways;ko00564//Glycerophospholipid metabolism;ko00590//Arachidonic acid metabolism;ko00565//Ether lipid metabolism;ko00591//Linoleic acid metabolism;ko00592//alpha-Linolenic acid metabolism;ko04977//Vitamin digestion and absorption	-	GO:0003674//molecular_function	GO:0006629//lipid metabolic process;GO:0008150//biological_process
ENSDARG00000089312	1	47	0.265	12.38	5.54588	1.35412e-14	1.78292e-12	yes	si:ch73-106l15.4	-	-	-	-	-
ENSDARG00000093844	256.5	11692	52.255	2417.19	5.53162	4.53749e-120	5.91461e-116	yes	zgc:136461	-	-	-	-	-
ENSDARG00000008029	3.5	155	0.18	8.265	5.52095	3.5394e-31	1.23029e-28	yes	mep1a.2	meprin A, alpha (PABA peptide hydrolase), tandem duplicate 2 [Source:ZFIN;Acc:ZDB-GENE-041001-208]	-	GO:0016020//membrane;GO:0005575//cellular_component	GO:0046872//metal ion binding;GO:0008237//metallopeptidase activity;GO:0004222//metalloendopeptidase activity;GO:0008270//zinc ion binding;GO:0016787//hydrolase activity;GO:0008233//peptidase activity;GO:0003674//molecular_function;GO:0043167//ion binding	GO:0045766//positive regulation of angiogenesis;GO:0006508//proteolysis;GO:0008150//biological_process
ENSDARG00000041848	4	174	0.325	14.23	5.45235	2.91612e-33	1.16959e-30	yes	rh50	Rh50-like protein [Source:ZFIN;Acc:ZDB-GENE-000427-1]	-	GO:0016020//membrane;GO:0016021//integral component of membrane;GO:0005575//cellular_component	GO:0008519//ammonium transmembrane transporter activity;GO:0003674//molecular_function;GO:0022857//transmembrane transporter activity	GO:0015696//ammonium transport;GO:0006810//transport;GO:0008150//biological_process
ENSDARG00000101051	9	339.5	1.785	77	5.43086	5.17589e-51	4.35275e-48	yes	ctsbb	cathepsin Bb [Source:ZFIN;Acc:ZDB-GENE-070323-1]	ko04142//Lysosome;ko04612//Antigen processing and presentation	-	GO:0004197//cysteine-type endopeptidase activity;GO:0008234//cysteine-type peptidase activity;GO:0008233//peptidase activity;GO:0016787//hydrolase activity;GO:0003674//molecular_function	GO:0006508//proteolysis;GO:0050790//regulation of catalytic activity;GO:0008150//biological_process
ENSDARG00000067806	0.5	20.5	0.06	2.545	5.40656	2.94394e-07	1.55361e-05	yes	zgc:158432	zgc:158432 [Source:ZFIN;Acc:ZDB-GENE-061201-57]	-	GO:0005575//cellular_component;GO:0005575//cellular_component	GO:0003674//molecular_function;GO:0003674//molecular_function	GO:0008150//biological_process;GO:0008150//biological_process
ENSDARG00000043173	4.5	186.5	0.835	35.175	5.39663	5.83872e-37	3.04431e-34	yes	CELA1 (4 of 7)	chymotrypsin-like elastase family, member 1 [Source:HGNC Symbol;Acc:HGNC:3308]	-	GO:0005575//cellular_component;GO:0005575//cellular_component	GO:0016787//hydrolase activity;GO:0008236//serine-type peptidase activity;GO:0004252//serine-type endopeptidase activity;GO:0008233//peptidase activity;GO:0003674//molecular_function	GO:0006508//proteolysis;GO:0008150//biological_process
ENSDARG00000024503	4.5	182.5	0.835	34.635	5.37431	4.75098e-36	2.25196e-33	yes	c6ast3	six-cysteine containing astacin protease 3 [Source:ZFIN;Acc:ZDB-GENE-050320-99]	-	GO:0005575//cellular_component;GO:0005575//cellular_component	GO:0016787//hydrolase activity;GO:0008233//peptidase activity;GO:0008270//zinc ion binding;GO:0046872//metal ion binding;GO:0008237//metallopeptidase activity;GO:0004222//metalloendopeptidase activity;GO:0003674//molecular_function;GO:0043167//ion binding	GO:0006508//proteolysis;GO:0008150//biological_process
ENSDARG00000031278	0.5	21.5	0.03	1.235	5.3634	8.59989e-07	4.03236e-05	yes	si:ch73-193i2.2	-	-	-	-	-
ENSDARG00000089050	3	116.5	0.21	8.52	5.34239	2.50838e-26	6.87289e-24	yes	cuzd1.1	-	-	-	-	-
ENSDARG00000099185	669	26841	55.57	2244.4	5.33588	2.18199e-129	5.68845e-125	yes	chia.2	chitinase, acidic.2 [Source:ZFIN;Acc:ZDB-GENE-040426-2014]	ko00520//Amino sugar and nucleotide sugar metabolism	GO:0005576//extracellular region;GO:0005575//cellular_component	GO:0004568//chitinase activity;GO:0004553//hydrolase activity, hydrolyzing O-glycosyl compounds;GO:0008061//chitin binding;GO:0003674//molecular_function;GO:0016798//hydrolase activity, acting on glycosyl bonds	GO:0005975//carbohydrate metabolic process;GO:0006032//chitin catabolic process;GO:0006030//chitin metabolic process;GO:0008150//biological_process;GO:0009056//catabolic process
ENSDARG00000079043	0.5	18	0.15	5.8	5.27302	8.46062e-08	4.98432e-06	yes	si:dkeyp-75b4.10	-	-	-	-	-
ENSDARG00000095005	0.5	18	0.105	3.905	5.21686	8.46971e-08	4.98432e-06	yes	si:dkey-21e2.10	-	-	-	-	-
ENSDARG00000095462	4	139	0.755	27.27	5.17469	1.87588e-27	5.55729e-25	yes	CELA1 (7 of 7)	-	-	-	GO:0003674//molecular_function;GO:0008233//peptidase activity	-
ENSDARG00000009443	164.5	5686.5	14.19	495.22	5.12512	1.09697e-112	9.53268e-109	yes	zgc:92137	zgc:92137 [Source:ZFIN;Acc:ZDB-GENE-040801-179]	-	-	GO:0016787//hydrolase activity;GO:0043169//cation binding;GO:0003824//catalytic activity;GO:0004556//alpha-amylase activity;GO:0016798//hydrolase activity, acting on glycosyl bonds;GO:0003674//molecular_function;GO:0043167//ion binding	GO:0008152//metabolic process;GO:0005975//carbohydrate metabolic process;GO:0008150//biological_process
ENSDARG00000052578	105	3604	19.285	670.415	5.1195	2.70925e-108	1.76575e-104	yes	c6ast4	-	-	GO:0005575//cellular_component;GO:0005575//cellular_component	GO:0016787//hydrolase activity;GO:0008233//peptidase activity;GO:0004222//metalloendopeptidase activity;GO:0008237//metallopeptidase activity;GO:0046872//metal ion binding;GO:0008270//zinc ion binding;GO:0003674//molecular_function;GO:0043167//ion binding	GO:0006508//proteolysis;GO:0008150//biological_process
ENSDARG00000097080	2.5	88.5	0.045	1.54	5.09686	1.77447e-18	2.98454e-16	yes	si:ch73-181m17.1	-	-	-	-	-
ENSDARG00000016391	3.5	112	0.15	4.97	5.05021	5.38332e-25	1.3366e-22	yes	calcoco1b	calcium binding and coiled-coil domain 1b [Source:ZFIN;Acc:ZDB-GENE-031118-126]	-	GO:0005575//cellular_component;GO:0005575//cellular_component	GO:0003746//translation elongation factor activity;GO:0003674//molecular_function;GO:0003723//RNA binding;GO:0008135//translation factor activity, nucleic acid binding	GO:0006412//translation;GO:0006414//translational elongation;GO:0008150//biological_process;GO:0009058//biosynthetic process
XLOC_021528	0.5	16	0.05	1.595	4.99548	3.96432e-07	2.0225e-05	yes	TCONS_00052927	PREDICTED: 5-hydroxytryptamine receptor 3C-like [Danio rerio]	-	-	-	-
ENSDARG00000069293	3.5	109.5	0.35	10.985	4.97204	2.66447e-24	6.37272e-22	yes	ahsg2	alpha-2-HS-glycoprotein 2 [Source:ZFIN;Acc:ZDB-GENE-030131-1133]	-	GO:0005615//extracellular space;GO:0005575//cellular_component;GO:0005576//extracellular region	GO:0004869//cysteine-type endopeptidase inhibitor activity;GO:0003674//molecular_function;GO:0030234//enzyme regulator activity	-
ENSDARG00000101040	0.5	15.5	0.175	5.4	4.94753	5.7051e-07	2.78004e-05	yes	ccl20a.3	chemokine (C-C motif) ligand 20a, duplicate 3 [Source:ZFIN;Acc:ZDB-GENE-081022-193]	ko04062//Chemokine signaling pathway;ko04060//Cytokine-cytokine receptor interaction;ko05323//Rheumatoid arthritis	GO:0005615//extracellular space;GO:0005576//extracellular region;GO:0005575//cellular_component	GO:0008009//chemokine activity;GO:0005125//cytokine activity;GO:0003674//molecular_function	GO:0006955//immune response;GO:0006935//chemotaxis;GO:0008150//biological_process;GO:0040011//locomotion;GO:0002376//immune system process
ENSDARG00000041540	5.5	168.5	0.495	15.09	4.93002	2.27666e-29	7.41908e-27	yes	sult1st2	-	-	-	-	-
ENSDARG00000014356	0.5	11	0.045	1.365	4.92283	6.83025e-05	0.00181699	yes	krt95	kertain 95 [Source:ZFIN;Acc:ZDB-GENE-040718-88]	-	GO:0005882//intermediate filament;GO:0005575//cellular_component;GO:0005622//intracellular;GO:0005623//cell;GO:0005856//cytoskeleton;GO:0043226//organelle;GO:0043234//protein complex	GO:0005198//structural molecule activity;GO:0003674//molecular_function	GO:0008150//biological_process;GO:0008150//biological_process
ENSDARG00000056018	6	135.5	0.235	6.985	4.89353	4.22119e-24	9.91408e-22	yes	itga6l	integrin, alpha 6, like [Source:ZFIN;Acc:ZDB-GENE-040914-57]	-	GO:0005575//cellular_component;GO:0005623//cell;GO:0005886//plasma membrane;GO:0043234//protein complex	GO:0003674//molecular_function	GO:0007165//signal transduction;GO:0008150//biological_process;GO:0007155//cell adhesion
ENSDARG00000009153	12	347	0.785	22.965	4.8706	1.05234e-48	7.41473e-46	yes	pla2g1b	phospholipase A2, group IB (pancreas) [Source:ZFIN;Acc:ZDB-GENE-070117-1]	ko01100//Metabolic pathways;ko04010//MAPK signaling pathway;ko04270//Vascular smooth muscle contraction;ko05145//Toxoplasmosis;ko04912//GnRH signaling pathway;ko04666//Fc gamma R-mediated phagocytosis;ko04724//Glutamatergic synapse;ko04972//Pancreatic secretion;ko04370//VEGF signaling pathway;ko04664//Fc epsilon RI signaling pathway;ko04730//Long-term depression;ko00564//Glycerophospholipid metab…	GO:0005575//cellular_component;GO:0005576//extracellular region	GO:0003674//molecular_function;GO:0043167//ion binding	GO:0006629//lipid metabolic process;GO:0008150//biological_process;GO:0009056//catabolic process
ENSDARG00000013856	172.5	4649.5	18.94	546.165	4.84983	9.73428e-88	3.62533e-84	yes	amy2a	amylase, alpha 2A (pancreatic) [Source:ZFIN;Acc:ZDB-GENE-040426-2393]	ko01100//Metabolic pathways;ko04972//Pancreatic secretion;ko04970//Salivary secretion;ko04973//Carbohydrate digestion and absorption;ko00500//Starch and sucrose metabolism	-	GO:0016798//hydrolase activity, acting on glycosyl bonds;GO:0043169//cation binding;GO:0003824//catalytic activity;GO:0004556//alpha-amylase activity;GO:0016787//hydrolase activity;GO:0003674//molecular_function;GO:0043167//ion binding	GO:0005975//carbohydrate metabolic process;GO:0008152//metabolic process;GO:0008150//biological_process
ENSDARG00000040683	7.5	213	0.385	10.885	4.82134	1.03781e-36	5.20302e-34	yes	MEP1B (2 of 2)	-	-	GO:0005575//cellular_component	GO:0003674//molecular_function;GO:0008233//peptidase activity;GO:0043167//ion binding	GO:0008150//biological_process
ENSDARG00000100792	34	765.5	1.015	26.54	4.70862	5.49683e-66	7.96124e-63	yes	zgc:154142	-	-	GO:0005575//cellular_component;GO:0005575//cellular_component	GO:0016787//hydrolase activity;GO:0008236//serine-type peptidase activity;GO:0004252//serine-type endopeptidase activity;GO:0008233//peptidase activity;GO:0003674//molecular_function	GO:0006508//proteolysis;GO:0008150//biological_process
ENSDARG00000039116	14	339	1.305	33.145	4.66667	4.85844e-43	2.94557e-40	yes	nr5a5	-	-	GO:0005634//nucleus;GO:0005575//cellular_component;GO:0005622//intracellular;GO:0005623//cell;GO:0043226//organelle	GO:0003677//DNA binding;GO:0003700//sequence-specific DNA binding transcription factor activity;GO:0003707//steroid hormone receptor activity;GO:0043565//sequence-specific DNA binding;GO:0008270//zinc ion binding;GO:0046872//metal ion binding;GO:0003674//molecular_function;GO:0043167//ion binding;GO:0003677//DNA binding;GO:0004871//signal transducer activity;GO:0001071//nucleic acid binding trans…	GO:0006355//regulation of transcription, DNA-templated;GO:0043401//steroid hormone mediated signaling pathway;GO:0006351//transcription, DNA-templated;GO:0008150//biological_process;GO:0009058//biosynthetic process;GO:0034641//cellular nitrogen compound metabolic process;GO:0007165//signal transduction
ENSDARG00000025311	2	56.5	0.175	4.325	4.62727	1.9715e-16	2.92029e-14	yes	cuzd1.2	-	-	-	GO:0003674//molecular_function	GO:0002376//immune system process;GO:0008150//biological_process
ENSDARG00000030915	48	1095.5	4.77	115.575	4.5987	2.53396e-68	3.88591e-65	yes	cpa1	carboxypeptidase A1 (pancreatic) [Source:ZFIN;Acc:ZDB-GENE-050522-438]	-	GO:0005575//cellular_component;GO:0005575//cellular_component	GO:0016787//hydrolase activity;GO:0008233//peptidase activity;GO:0004180//carboxypeptidase activity;GO:0004181//metallocarboxypeptidase activity;GO:0008270//zinc ion binding;GO:0003674//molecular_function;GO:0043167//ion binding	GO:0006508//proteolysis;GO:0008150//biological_process
XLOC_008810	1	23.5	0.215	5.15	4.58216	4.85898e-09	3.53837e-07	yes	TCONS_00021921	PREDICTED: urokinase plasminogen activator surface receptor-like isoform X2 [Maylandia zebra]	-	-	-	-
ENSDARG00000026049	0.5	11	0.03	0.71	4.56478	4.05922e-05	0.00117452	yes	mxf	myxovirus (influenza virus) resistance F [Source:ZFIN;Acc:ZDB-GENE-030721-9]	-	-	GO:0003674//molecular_function;GO:0003924//GTPase activity;GO:0043167//ion binding	-
ENSDARG00000037873	16	373	0.99	23.005	4.53838	1.40668e-40	8.14938e-38	yes	cyp3c3	-	-	-	-	-
ENSDARG00000007906	19	424	0.165	3.74	4.5025	5.97925e-46	3.9969e-43	yes	lrp2b	-	-	GO:0005575//cellular_component	GO:0003674//molecular_function;GO:0043167//ion binding	-
ENSDARG00000007276	431.5	9382.5	78.195	1720.1	4.45927	6.64158e-94	3.46292e-90	yes	ela3l	-	-	-	-	-
ENSDARG00000061355	81.5	1792.5	4.155	91.25	4.4569	3.53522e-65	4.60816e-62	yes	aoc1	amine oxidase, copper containing 1 [Source:ZFIN;Acc:ZDB-GENE-061103-112]	ko00330//Arginine and proline metabolism;ko00380//Tryptophan metabolism;ko00340//Histidine metabolism	GO:0005575//cellular_component;GO:0005575//cellular_component	GO:0046872//metal ion binding;GO:0048038//quinone binding;GO:0005507//copper ion binding;GO:0008131//primary amine oxidase activity;GO:0016491//oxidoreductase activity;GO:0003674//molecular_function;GO:0043167//ion binding	GO:0055114//oxidation-reduction process;GO:0009308//amine metabolic process;GO:0008150//biological_process
ENSDARG00000090469	1	21.5	0.39	8.525	4.45015	8.24772e-08	4.88677e-06	yes	SYCN (1 of 3)	-	-	-	-	-
ENSDARG00000103295	257	5553	12.915	281.33	4.44514	1.45988e-86	4.75739e-83	yes	cyp3a65	cytochrome P450, family 3, subfamily A, polypeptide 65 [Source:ZFIN;Acc:ZDB-GENE-050604-1]	ko01100//Metabolic pathways;ko04976//Bile secretion;ko00980//Metabolism of xenobiotics by cytochrome P450;ko00982//Drug metabolism - cytochrome P450;ko00983//Drug metabolism - other enzymes;ko00830//Retinol metabolism;ko00140//Steroid hormone biosynthesis;ko00591//Linoleic acid metabolism	-	GO:0016705//oxidoreductase activity, acting on paired donors, with incorporation or reduction of molecular oxygen;GO:0005506//iron ion binding;GO:0016491//oxidoreductase activity;GO:0004497//monooxygenase activity;GO:0020037//heme binding;GO:0046872//metal ion binding;GO:0003674//molecular_function;GO:0043167//ion binding	GO:0055114//oxidation-reduction process;GO:0009410//response to xenobiotic stimulus;GO:0008150//biological_process
ENSDARG00000044862	0.5	11.5	0.045	0.975	4.43741	2.72937e-05	0.000835148	yes	opn1lw1	opsin 1 (cone pigments), long-wave-sensitive, 1 [Source:ZFIN;Acc:ZDB-GENE-990604-41]	-	GO:0005575//cellular_component	GO:0003674//molecular_function;GO:0004871//signal transducer activity	GO:0008150//biological_process;GO:0050877//neurological system process;GO:0006464//cellular protein modification process;GO:0007165//signal transduction
ENSDARG00000096110	0.5	10.5	0.065	1.37	4.39759	0.00013962	0.00335492	yes	TSG101	tumor susceptibility 101 [Source:HGNC Symbol;Acc:HGNC:15971]	-	GO:0005575//cellular_component;GO:0005575//cellular_component	-	GO:0006464//cellular protein modification process;GO:0015031//protein transport;GO:0006810//transport;GO:0008150//biological_process
ENSDARG00000045835	54	1043	14.645	306.115	4.38559	1.66672e-68	2.71571e-65	yes	si:dkey-14d8.6	-	-	-	-	-
ENSDARG00000096739	5.5	112.5	0.4	8.21	4.35931	1.40037e-22	2.92062e-20	yes	si:ch211-222b21.3	-	-	-	-	-
ENSDARG00000102907	42.5	857	1.405	28.545	4.3446	6.67062e-65	8.2811e-62	yes	CABZ01072043.1	-	-	-	-	-
ENSDARG00000056765	732.5	13991.5	136.92	2666.38	4.28347	1.39053e-91	6.04185e-88	yes	ela2l	elastase 2 like [Source:ZFIN;Acc:ZDB-GENE-040511-1]	-	GO:0005575//cellular_component;GO:0005575//cellular_component	GO:0004252//serine-type endopeptidase activity;GO:0008233//peptidase activity;GO:0016787//hydrolase activity;GO:0008236//serine-type peptidase activity;GO:0003674//molecular_function	GO:0006508//proteolysis;GO:0008150//biological_process
ENSDARG00000100621	3	47	0.085	1.61	4.24345	8.57716e-12	8.65834e-10	yes	CABZ01080550.1	-	-	-	-	-
ENSDARG00000077058	13	237.5	1.135	20.97	4.20756	3.73781e-34	1.57169e-31	yes	CELA1 (6 of 7)	-	-	-	-	-
ENSDARG00000012609	13.5	246.5	0.795	14.53	4.19194	4.68704e-35	2.07104e-32	yes	hpx	hemopexin [Source:ZFIN;Acc:ZDB-GENE-030131-5773]	-	GO:0005575//cellular_component;GO:0005576//extracellular region;GO:0005575//cellular_component;GO:0005576//extracellular region	-	GO:0006810//transport;GO:0008150//biological_process;GO:0006810//transport;GO:0008150//biological_process
ENSDARG00000098063	5.5	97.5	0.495	8.915	4.17073	2.37262e-19	4.29542e-17	yes	alp3	alkaline phosphatase 3 [Source:ZFIN;Acc:ZDB-GENE-120919-1]	ko01100//Metabolic pathways;ko00790//Folate biosynthesis	-	GO:0016787//hydrolase activity;GO:0016791//phosphatase activity;GO:0003824//catalytic activity;GO:0003674//molecular_function	GO:0008152//metabolic process;GO:0008150//biological_process
ENSDARG00000070892	4.5	65.5	0.36	6.42	4.1565	1.50901e-14	1.967e-12	yes	si:ch211-262h13.5	si:ch211-262h13.5 [Source:ZFIN;Acc:ZDB-GENE-050208-372]	-	GO:0005615//extracellular space;GO:0005575//cellular_component;GO:0005576//extracellular region	GO:0004869//cysteine-type endopeptidase inhibitor activity;GO:0003674//molecular_function;GO:0030234//enzyme regulator activity	-
ENSDARG00000062598	0.5	8	0.025	0.445	4.15381	0.00138919	0.0217645	yes	ltc4s	leukotriene C4 synthase [Source:ZFIN;Acc:ZDB-GENE-110411-32]	ko01100//Metabolic pathways;ko00590//Arachidonic acid metabolism	GO:0005575//cellular_component	GO:0003674//molecular_function;GO:0030234//enzyme regulator activity	-
ENSDARG00000003902	115.5	2018.5	14.69	259.615	4.14347	1.05396e-68	1.83178e-65	yes	ctsl.1	cathepsin L.1 [Source:ZFIN;Acc:ZDB-GENE-040718-61]	-	GO:0005575//cellular_component;GO:0005575//cellular_component	GO:0016787//hydrolase activity;GO:0008234//cysteine-type peptidase activity;GO:0008233//peptidase activity;GO:0003674//molecular_function	GO:0006508//proteolysis;GO:0008150//biological_process
ENSDARG00000102617	1	17.5	0.275	4.845	4.13899	6.22886e-07	3.00159e-05	yes	FQ311892.2	-	-	-	-	-
ENSDARG00000007358	0.5	9	0.025	0.44	4.1375	0.00256862	0.0344342	yes	cxcr3.1	-	ko04062//Chemokine signaling pathway;ko04060//Cytokine-cytokine receptor interaction	-	-	-
ENSDARG00000074150	2	34.5	0.07	1.23	4.13516	5.05945e-08	3.12559e-06	yes	si:ch211-226h7.5	-	-	-	-	-
ENSDARG00000045142	3.5	55	1.22	20.925	4.10027	3.67805e-13	4.24278e-11	yes	hbz	hemoglobin zeta [Source:ZFIN;Acc:ZDB-GENE-101028-1]	-	-	GO:0003674//molecular_function;GO:0043167//ion binding	GO:0006810//transport;GO:0008150//biological_process
ENSDARG00000052626	1	17	0.025	0.425	4.08746	1.20546e-06	5.47222e-05	yes	-	-	-	-	-	-
ENSDARG00000079274	1564	26035	329.46	5557.4	4.07624	5.72314e-84	1.6578e-80	yes	prss59.1	protease, serine, 59, tandem duplicate 1 [Source:ZFIN;Acc:ZDB-GENE-030131-1173]	-	GO:0005615//extracellular space;GO:0005575//cellular_component;GO:0005576//extracellular region;GO:0005615//extracellular space	GO:0004252//serine-type endopeptidase activity;GO:0008233//peptidase activity;GO:0016787//hydrolase activity;GO:0008236//serine-type peptidase activity;GO:0003674//molecular_function	GO:0006508//proteolysis;GO:0008150//biological_process
ENSDARG00000056744	988.5	16195	193.945	3224.22	4.05523	5.3945e-80	1.40635e-76	yes	ela2	-	-	-	GO:0004252//serine-type endopeptidase activity;GO:0008233//peptidase activity;GO:0016787//hydrolase activity;GO:0008236//serine-type peptidase activity;GO:0003674//molecular_function	GO:0006508//proteolysis;GO:0008150//biological_process
ENSDARG00000054898	9	133.5	1.195	19.845	4.05369	1.14589e-21	2.35224e-19	yes	ms4a17a.17	membrane-spanning 4-domains, subfamily A, member 17A.17 [Source:ZFIN;Acc:ZDB-GENE-070424-27]	-	GO:0016021//integral component of membrane;GO:0005575//cellular_component	-	-
ENSDARG00000088120	0.5	8.5	0.015	0.245	4.02975	0.000523577	0.00979874	yes	CABZ01084616.1	-	-	-	-	-
ENSDARG00000103659	24.5	387.5	1.62	26.445	4.02893	2.54627e-32	9.62048e-30	yes	bco1l	beta-carotene oxygenase 1, like [Source:ZFIN;Acc:ZDB-GENE-040426-1191]	ko01100//Metabolic pathways;ko00830//Retinol metabolism	GO:0005575//cellular_component;GO:0005575//cellular_component	GO:0003674//molecular_function;GO:0003674//molecular_function	GO:0008150//biological_process;GO:0008150//biological_process
ENSDARG00000104721	13.5	200	12.865	201.74	3.97097	1.6284e-26	4.51622e-24	yes	si:dkey-203a12.9	-	-	-	-	-
ENSDARG00000092404	5.5	82.5	0.135	2.095	3.95592	6.52108e-16	9.39252e-14	yes	lct	-	ko01100//Metabolic pathways;ko04973//Carbohydrate digestion and absorption;ko00052//Galactose metabolism	-	-	-
ENSDARG00000068586	11	170.5	0.65	10.065	3.95276	7.93568e-21	1.5439e-18	yes	CDHR2	-	-	-	-	-
ENSDARG00000055595	15	192	1.32	20.215	3.93682	1.13601e-26	3.2191e-24	yes	clul1	clusterin-like 1 (retinal) [Source:ZFIN;Acc:ZDB-GENE-031118-57]	-	-	-	GO:0008219//cell death;GO:0008150//biological_process
ENSDARG00000026017	15	223.5	0.7	10.56	3.91511	5.07131e-30	1.69499e-27	yes	xpnpep2	-	-	GO:0005575//cellular_component;GO:0005575//cellular_component	GO:0016787//hydrolase activity;GO:0046872//metal ion binding;GO:0003674//molecular_function;GO:0043167//ion binding	-
ENSDARG00000043168	11.5	168.5	2.155	31.965	3.89073	1.11832e-25	2.91547e-23	yes	CELA1 (2 of 7)	chymotrypsin-like elastase family, member 1 [Source:HGNC Symbol;Acc:HGNC:3308]	-	GO:0005575//cellular_component;GO:0005575//cellular_component	GO:0004252//serine-type endopeptidase activity;GO:0003674//molecular_function;GO:0008233//peptidase activity	GO:0006508//proteolysis;GO:0008150//biological_process
ENSDARG00000077487	3	44.5	0.62	9.155	3.88422	2.68538e-12	2.83432e-10	yes	spsb3b	-	-	-	-	-
ENSDARG00000095409	1.5	22	0.04	0.585	3.87036	4.92824e-07	2.46129e-05	yes	si:ch211-226h7.8	-	-	-	-	-
ENSDARG00000074457	1	16.5	0.13	1.9	3.86942	1.72068e-06	7.45151e-05	yes	PFKFB1 (2 of 2)	6-phosphofructo-2-kinase/fructose-2,6-biphosphatase 1 [Source:HGNC Symbol;Acc:HGNC:8872]	-	-	GO:0003674//molecular_function;GO:0016301//kinase activity;GO:0043167//ion binding	GO:0008150//biological_process
ENSDARG00000100635	171.5	2434.5	14.475	207.095	3.83866	2.18216e-70	4.0635e-67	yes	chia.1	chitinase, acidic.1 [Source:ZFIN;Acc:ZDB-GENE-040426-1994]	-	GO:0005576//extracellular region;GO:0005575//cellular_component	GO:0004568//chitinase activity;GO:0008061//chitin binding;GO:0004553//hydrolase activity, hydrolyzing O-glycosyl compounds;GO:0003674//molecular_function;GO:0016798//hydrolase activity, acting on glycosyl bonds	GO:0005975//carbohydrate metabolic process;GO:0006030//chitin metabolic process;GO:0006032//chitin catabolic process;GO:0008150//biological_process;GO:0009056//catabolic process
ENSDARG00000044566	226.5	3142	119.92	1706.94	3.83127	4.79321e-59	4.99836e-56	yes	fabp6	fatty acid binding protein 6, ileal (gastrotropin) [Source:ZFIN;Acc:ZDB-GENE-040625-49]	ko03320//PPAR signaling pathway	GO:0005575//cellular_component;GO:0005575//cellular_component	GO:0032052//bile acid binding;GO:0008289//lipid binding;GO:0005215//transporter activity;GO:0003674//molecular_function;GO:0043167//ion binding	GO:0006810//transport;GO:0008150//biological_process
ENSDARG00000061858	131	1767.5	16.41	221.655	3.75567	2.38575e-45	1.55491e-42	yes	zgc:153968	zgc:153968 [Source:ZFIN;Acc:ZDB-GENE-061027-211]	-	GO:0005575//cellular_component;GO:0005575//cellular_component	GO:0004252//serine-type endopeptidase activity;GO:0003674//molecular_function;GO:0008233//peptidase activity	GO:0006508//proteolysis;GO:0008150//biological_process
ENSDARG00000060671	21.5	286	0.475	6.315	3.73278	1.25237e-31	4.47252e-29	yes	LCT (1 of 2)	-	ko01100//Metabolic pathways;ko04973//Carbohydrate digestion and absorption;ko00052//Galactose metabolism	-	-	-
ENSDARG00000039730	617	8107.5	56.32	746.5	3.72842	2.55242e-75	6.04924e-72	yes	zgc:112160	zgc:112160 [Source:ZFIN;Acc:ZDB-GENE-050417-229]	-	GO:0005575//cellular_component;GO:0005575//cellular_component	GO:0008233//peptidase activity;GO:0004252//serine-type endopeptidase activity;GO:0016787//hydrolase activity;GO:0008236//serine-type peptidase activity;GO:0003674//molecular_function	GO:0006508//proteolysis;GO:0008150//biological_process
ENSDARG00000068680	696	9107.5	72.36	956.97	3.72521	7.86594e-72	1.57742e-68	yes	ctrl	chymotrypsin-like [Source:ZFIN;Acc:ZDB-GENE-040912-147]	-	GO:0005575//cellular_component;GO:0005575//cellular_component	GO:0008233//peptidase activity;GO:0004252//serine-type endopeptidase activity;GO:0016787//hydrolase activity;GO:0008236//serine-type peptidase activity;GO:0003674//molecular_function	GO:0006508//proteolysis;GO:0008150//biological_process
ENSDARG00000009612	16	200.5	1.42	18.58	3.70979	3.87289e-27	1.12185e-24	yes	chia.3	-	ko00520//Amino sugar and nucleotide sugar metabolism	GO:0005576//extracellular region;GO:0005575//cellular_component;GO:0005576//extracellular region	GO:0004553//hydrolase activity, hydrolyzing O-glycosyl compounds;GO:0008061//chitin binding;GO:0004568//chitinase activity;GO:0003674//molecular_function;GO:0016798//hydrolase activity, acting on glycosyl bonds	GO:0005975//carbohydrate metabolic process;GO:0006030//chitin metabolic process;GO:0006032//chitin catabolic process;GO:0008150//biological_process;GO:0009056//catabolic process
ENSDARG00000054160	0.5	9	0.055	0.71	3.69032	0.000355751	0.00725835	yes	zgc:113625	zgc:113625 [Source:ZFIN;Acc:ZDB-GENE-050320-47]	-	GO:0005575//cellular_component;GO:0005575//cellular_component;GO:0005575//cellular_component;GO:0005575//cellular_component	GO:0005525//GTP binding;GO:0003674//molecular_function;GO:0043167//ion binding;GO:0005525//GTP binding;GO:0003674//molecular_function;GO:0043167//ion binding	-
ENSDARG00000097539	3.5	42.5	0.04	0.51	3.67243	3.65107e-08	2.31028e-06	yes	si:ch211-39f2.3	-	-	-	-	-
ENSDARG00000079227	2.5	32	0.255	3.195	3.64725	2.20389e-09	1.66537e-07	yes	plekhs1	pleckstrin homology domain containing, family S member 1 [Source:ZFIN;Acc:ZDB-GENE-080204-50]	-	GO:0005575//cellular_component;GO:0005575//cellular_component	-	GO:0008150//biological_process;GO:0008150//biological_process
ENSDARG00000023176	5.5	61	0.41	5.07	3.62829	6.80049e-12	6.9525e-10	yes	tdo2b	-	ko01100//Metabolic pathways;ko00380//Tryptophan metabolism	-	-	-
ENSDARG00000100795	10	121.5	1.655	20.195	3.6091	2.44857e-18	4.01473e-16	yes	timp4a	-	-	-	-	-
ENSDARG00000038321	11	130.5	3.415	40.5	3.56796	1.3282e-20	2.52746e-18	yes	zgc:172053	zgc:172053 [Source:ZFIN;Acc:ZDB-GENE-080219-25]	-	GO:0005575//cellular_component;GO:0005575//cellular_component	-	GO:0008150//biological_process;GO:0008150//biological_process
ENSDARG00000101632	1	10	0.085	0.99	3.54189	0.000757554	0.013228	yes	cyp2k20	-	-	GO:0005737//cytoplasm;GO:0043231//intracellular membrane-bounded organelle;GO:0005575//cellular_component;GO:0005622//intracellular;GO:0005623//cell;GO:0043226//organelle;GO:0005737//cytoplasm	GO:0016712//oxidoreductase activity, acting on paired donors, with incorporation or reduction of molecular oxygen, reduced flavin or flavoprotein as one donor, and incorporation of one atom of oxygen;GO:0016705//oxidoreductase activity, acting on paired donors, with incorporation or reduction of molecular oxygen;GO:0020037//heme binding;GO:0005506//iron ion binding;GO:0016491//oxidoreductase acti…	GO:0055114//oxidation-reduction process;GO:0042738//exogenous drug catabolic process;GO:0006082//organic acid metabolic process;GO:0006805//xenobiotic metabolic process;GO:0008150//biological_process;GO:0044281//small molecule metabolic process;GO:0009056//catabolic process
ENSDARG00000070966	2	23	0.51	5.895	3.53092	7.86472e-07	3.72788e-05	yes	insl5a	insulin-like 5a [Source:ZFIN;Acc:ZDB-GENE-050310-4]	-	GO:0005576//extracellular region;GO:0005575//cellular_component	GO:0005179//hormone activity;GO:0003674//molecular_function	-
ENSDARG00000090428	2616	29056.5	551.15	6233.38	3.4995	5.26121e-64	6.23454e-61	yes	ctrb1	chymotrypsinogen B1 [Source:ZFIN;Acc:ZDB-GENE-030131-1171]	-	-	GO:0008233//peptidase activity;GO:0004252//serine-type endopeptidase activity;GO:0016787//hydrolase activity;GO:0008236//serine-type peptidase activity;GO:0003674//molecular_function	GO:0006508//proteolysis;GO:0008150//biological_process
ENSDARG00000100315	31.5	347.5	1.775	19.945	3.49014	8.20721e-34	3.34315e-31	yes	slc15a1a	-	-	-	-	-
ENSDARG00000074613	38.5	413	16.065	175.785	3.45182	7.8573e-34	3.25143e-31	yes	si:ch211-240l19.6	-	-	-	-	-
ENSDARG00000017314	2637	28744.5	627.895	6859.27	3.44946	2.08615e-65	2.86242e-62	yes	CELA1 (1 of 7)	-	-	GO:0005575//cellular_component;GO:0005575//cellular_component	GO:0016787//hydrolase activity;GO:0008236//serine-type peptidase activity;GO:0004252//serine-type endopeptidase activity;GO:0008233//peptidase activity;GO:0003674//molecular_function	GO:0006508//proteolysis;GO:0008150//biological_process
ENSDARG00000029822	136	1478	10.6	115.495	3.44569	1.87228e-41	1.10933e-38	yes	cel.2	carboxyl ester lipase, tandem duplicate 2 [Source:ZFIN;Acc:ZDB-GENE-061110-10]	ko01100//Metabolic pathways;ko04972//Pancreatic secretion;ko00561//Glycerolipid metabolism;ko04975//Fat digestion and absorption;ko00100//Steroid biosynthesis	GO:0005575//cellular_component;GO:0005575//cellular_component;GO:0005576//extracellular region;GO:0005615//extracellular space;GO:0005575//cellular_component;GO:0005575//cellular_component;GO:0005576//extracellular region;GO:0005615//extracellular space	GO:0016787//hydrolase activity;GO:0004104//cholinesterase activity;GO:0003674//molecular_function;GO:0016787//hydrolase activity;GO:0004104//cholinesterase activity;GO:0003674//molecular_function	-
ENSDARG00000017490	305	3149.5	35.975	386.795	3.4265	1.59219e-53	1.48244e-50	yes	cel.1	carboxyl ester lipase, tandem duplicate 1 [Source:ZFIN;Acc:ZDB-GENE-030131-1201]	ko01100//Metabolic pathways;ko04972//Pancreatic secretion;ko00561//Glycerolipid metabolism;ko04975//Fat digestion and absorption;ko00100//Steroid biosynthesis	GO:0005615//extracellular space;GO:0005575//cellular_component;GO:0005576//extracellular region;GO:0005615//extracellular space	GO:0016787//hydrolase activity;GO:0052689//carboxylic ester hydrolase activity;GO:0004104//cholinesterase activity;GO:0003674//molecular_function	-
ENSDARG00000103687	143	1492	48.61	515.86	3.40765	4.00194e-52	3.47768e-49	yes	SYCN (3 of 3)	-	-	-	-	-
ENSDARG00000043175	18.5	186.5	2.425	25.65	3.4029	1.28634e-23	2.91608e-21	yes	CELA1 (5 of 7)	-	-	GO:0005575//cellular_component;GO:0005575//cellular_component	GO:0004252//serine-type endopeptidase activity;GO:0003674//molecular_function;GO:0008233//peptidase activity	GO:0006508//proteolysis;GO:0008150//biological_process
ENSDARG00000094511	1	12.5	0.23	2.43	3.40125	6.03074e-05	0.00163772	yes	ccl20b	chemokine (C-C motif) ligand 20b [Source:ZFIN;Acc:ZDB-GENE-091204-95]	ko04062//Chemokine signaling pathway;ko04060//Cytokine-cytokine receptor interaction;ko05323//Rheumatoid arthritis	GO:0005615//extracellular space;GO:0005576//extracellular region;GO:0005575//cellular_component;GO:0005615//extracellular space;GO:0005576//extracellular region;GO:0005575//cellular_component	GO:0005125//cytokine activity;GO:0008009//chemokine activity;GO:0003674//molecular_function;GO:0005125//cytokine activity;GO:0008009//chemokine activity;GO:0003674//molecular_function	GO:0006955//immune response;GO:0006935//chemotaxis;GO:0008150//biological_process;GO:0040011//locomotion;GO:0002376//immune system process;GO:0006955//immune response;GO:0006935//chemotaxis;GO:0008150//biological_process;GO:0040011//locomotion;GO:0002376//immune system process
ENSDARG00000100504	5.5	55.5	0.435	4.5	3.37084	1.27354e-11	1.24817e-09	yes	ppp1r27b	protein phosphatase 1, regulatory subunit 27b [Source:ZFIN;Acc:ZDB-GENE-051023-5]	-	GO:0005575//cellular_component;GO:0005575//cellular_component	GO:0003674//molecular_function;GO:0003674//molecular_function	GO:0008150//biological_process;GO:0008150//biological_process
XLOC_029444	6.5	66.5	1.105	11.39	3.36565	5.13847e-12	5.29486e-10	yes	TCONS_00070030	PREDICTED: ATP-binding cassette sub-family A member 1-like [Danio rerio]	ko02010//ABC transporters;ko04975//Fat digestion and absorption	-	-	-
ENSDARG00000094120	2	21	0.105	1.08	3.36257	8.48235e-06	0.000302924	yes	BX548047.2	-	-	-	-	-
ENSDARG00000039393	62	617	9.23	92.54	3.32567	3.06047e-35	1.39976e-32	yes	si:ch211-240l19.5	-	-	-	-	-
ENSDARG00000042953	53.5	530	4.16	41.265	3.31026	9.78192e-37	5.00029e-34	yes	cyp2n13	cytochrome P450, family 2, subfamily N, polypeptide 13 [Source:ZFIN;Acc:ZDB-GENE-041001-158]	-	GO:0005737//cytoplasm;GO:0043231//intracellular membrane-bounded organelle;GO:0005575//cellular_component;GO:0005622//intracellular;GO:0005623//cell;GO:0043226//organelle;GO:0005737//cytoplasm	GO:0046872//metal ion binding;GO:0008395//steroid hydroxylase activity;GO:0016712//oxidoreductase activity, acting on paired donors, with incorporation or reduction of molecular oxygen, reduced flavin or flavoprotein as one donor, and incorporation of one atom of oxygen;GO:0008392//arachidonic acid epoxygenase activity;GO:0016705//oxidoreductase activity, acting on paired donors, with incorporati…	GO:0055114//oxidation-reduction process;GO:0019369//arachidonic acid metabolic process;GO:0042738//exogenous drug catabolic process;GO:0006805//xenobiotic metabolic process;GO:0008150//biological_process;GO:0009056//catabolic process;GO:0006629//lipid metabolic process;GO:0044281//small molecule metabolic process
ENSDARG00000102895	8.5	82	2.185	21.59	3.30466	5.45398e-13	6.18197e-11	yes	si:dkey-31i7.1	si:dkey-31i7.1 [Source:ZFIN;Acc:ZDB-GENE-131127-342]	-	-	-	GO:0007160//cell-matrix adhesion;GO:0007155//cell adhesion;GO:0008150//biological_process
ENSDARG00000103642	2	20	0.185	1.815	3.29437	3.17653e-06	0.00012859	yes	pglyrp6	peptidoglycan recognition protein 6 [Source:ZFIN;Acc:ZDB-GENE-071227-2]	-	-	GO:0008745//N-acetylmuramoyl-L-alanine amidase activity;GO:0008270//zinc ion binding;GO:0003674//molecular_function;GO:0043167//ion binding;GO:0016810//hydrolase activity, acting on carbon-nitrogen (but not peptide) bonds	GO:0042742//defense response to bacterium;GO:0009253//peptidoglycan catabolic process;GO:0008150//biological_process;GO:0009056//catabolic process;GO:0006950//response to stress
ENSDARG00000077504	6	57.5	1.7	16.575	3.2854	5.05149e-11	4.65344e-09	yes	si:ch211-103n10.5	si:ch211-103n10.5 [Source:ZFIN;Acc:ZDB-GENE-030131-5155]	-	GO:0005575//cellular_component;GO:0005622//intracellular;GO:0005623//cell;GO:0005634//nucleus;GO:0043226//organelle;GO:0005694//chromosome	GO:0003674//molecular_function;GO:0003677//DNA binding	GO:0006461//protein complex assembly;GO:0008150//biological_process;GO:0022607//cellular component assembly;GO:0051276//chromosome organization;GO:0065003
ENSDARG00000045442	1004	9549.5	78.39	759.135	3.27561	1.68723e-59	1.83276e-56	yes	cpb1	-	-	-	-	-
ENSDARG00000028389	1	10	0.02	0.19	3.24793	0.00065799	0.0118058	yes	rab44	RAB44, member RAS oncogene family [Source:ZFIN;Acc:ZDB-GENE-040724-117]	-	GO:0005575//cellular_component;GO:0005623//cell;GO:0005622//intracellular;GO:0005575//cellular_component;GO:0005623//cell;GO:0005622//intracellular	GO:0003674//molecular_function;GO:0003924//GTPase activity;GO:0043167//ion binding;GO:0003674//molecular_function;GO:0003924//GTPase activity;GO:0043167//ion binding	GO:0006810//transport;GO:0008150//biological_process;GO:0007165//signal transduction;GO:0006810//transport;GO:0008150//biological_process;GO:0007165//signal transduction
ENSDARG00000069566	1.5	13	0.05	0.475	3.24793	0.00254951	0.0343012	yes	mucms1	-	-	-	-	-
ENSDARG00000087633	15	142.5	0.51	4.815	3.23897	1.36968e-18	2.33382e-16	yes	MAMDC4	-	-	-	-	-
XLOC_030172	7.5	70	0.805	7.54	3.2275	4.49391e-13	5.16106e-11	yes	TCONS_00071739	PREDICTED: ATP-binding cassette sub-family A member 1-like, partial [Danio rerio]	ko02010//ABC transporters;ko04975//Fat digestion and absorption	-	-	-
ENSDARG00000079980	5	46	1.465	13.71	3.22626	2.49953e-10	2.08474e-08	yes	si:ch211-202h22.9	-	-	-	-	-
ENSDARG00000090899	41	370.5	21.705	201.385	3.21386	4.6646e-32	1.71276e-29	yes	SYCN (2 of 3)	-	-	-	-	-
ENSDARG00000095333	1	9	0.095	0.875	3.20328	0.00125364	0.0200015	yes	si:ch211-157j23.3	-	-	-	-	-
ENSDARG00000090618	29.5	268	0.63	5.72	3.18259	1.54763e-21	3.12765e-19	yes	malrd1	MAM and LDL receptor class A domain containing 1 [Source:ZFIN;Acc:ZDB-GENE-140106-257]	-	GO:0016020//membrane;GO:0005575//cellular_component	-	-
ENSDARG00000045854	1	9	0.19	1.72	3.17834	0.00193994	0.0281594	yes	fgf23	fibroblast growth factor 23 [Source:ZFIN;Acc:ZDB-GENE-050201-4]	ko05200//Pathways in cancer;ko04010//MAPK signaling pathway;ko04810//Regulation of actin cytoskeleton;ko05218//Melanoma	GO:0005576//extracellular region;GO:0005575//cellular_component	GO:0008083//growth factor activity;GO:0005104//fibroblast growth factor receptor binding;GO:0003674//molecular_function	GO:0030643//cellular phosphate ion homeostasis;GO:0008543//fibroblast growth factor receptor signaling pathway;GO:0030500//regulation of bone mineralization;GO:0008150//biological_process;GO:0007165//signal transduction;GO:0042592//homeostatic process
ENSDARG00000099546	271.5	453.5	9.215	83.23	3.17505	0.000357205	0.00727526	yes	kynu	kynureninase [Source:ZFIN;Acc:ZDB-GENE-120215-204]	-	GO:0005575//cellular_component;GO:0005622//intracellular;GO:0005623//cell;GO:0005737//cytoplasm	GO:0003674//molecular_function;GO:0043167//ion binding	GO:0008150//biological_process;GO:0009058//biosynthetic process;GO:0034641//cellular nitrogen compound metabolic process;GO:0044281//small molecule metabolic process;GO:0051186//cofactor metabolic process
ENSDARG00000094840	6	53	1.475	13.29	3.17155	5.10407e-11	4.68533e-09	yes	si:dkey-21e2.13	-	-	-	-	-
ENSDARG00000055520	1	8	0.11	0.99	3.16993	0.00382196	0.0463866	yes	ftr61	-	-	-	GO:0003674//molecular_function;GO:0043167//ion binding	-
ENSDARG00000104569	84	752	9.42	84.635	3.16746	3.89604e-35	1.7512e-32	yes	CABZ01088484.1	-	-	-	-	-
ENSDARG00000099558	91.5	814	2.72	24.18	3.15214	7.31481e-39	3.97286e-36	yes	NPC1L1	-	-	-	-	-
ENSDARG00000040278	7	59	0.49	4.335	3.14518	2.04653e-08	1.36272e-06	yes	klhl38b	-	-	-	-	-
ENSDARG00000053526	35.5	315	2.805	24.815	3.14514	3.38158e-23	7.53486e-21	yes	enpp7.1	-	-	-	-	-
ENSDARG00000092704	2	17.5	0.08	0.705	3.13955	0.000205437	0.00460908	yes	BX072532.1	-	-	-	-	-
ENSDARG00000103951	1	8.5	0.2	1.75	3.12928	0.00238236	0.0326542	yes	FO834808.2	-	-	-	-	-
ENSDARG00000042993	2921	25027.5	580.315	5042.78	3.11931	1.33467e-56	1.2887e-53	yes	try	-	ko04080//Neuroactive ligand-receptor interaction;ko05164//Influenza A;ko04972//Pancreatic secretion;ko04974//Protein digestion and absorption	-	-	-
ENSDARG00000088309	1	8.5	0.06	0.52	3.11548	0.00358313	0.0442419	yes	ENDOD1 (10 of 12)	-	-	-	-	-
ENSDARG00000017193	6.5	55.5	1.065	9.205	3.11156	2.16628e-11	2.08394e-09	yes	cnn1a	calponin 1, basic, smooth muscle, a [Source:ZFIN;Acc:ZDB-GENE-090312-141]	-	-	GO:0003779//actin binding;GO:0005516//calmodulin binding;GO:0003674//molecular_function;GO:0008092//cytoskeletal protein binding	GO:0031032//actomyosin structure organization;GO:0007010//cytoskeleton organization;GO:0008150//biological_process
ENSDARG00000103034	79.5	679	11.98	103.205	3.10681	1.21421e-39	6.88142e-37	yes	CRISP3	-	-	-	-	-
ENSDARG00000053476	5	36	0.4	3.44	3.10434	3.01391e-07	1.58732e-05	yes	lipca	lipase, hepatic a [Source:ZFIN;Acc:ZDB-GENE-040426-1361]	ko01100//Metabolic pathways;ko00564//Glycerophospholipid metabolism;ko00561//Glycerolipid metabolism;ko00592//alpha-Linolenic acid metabolism	GO:0005576//extracellular region;GO:0005575//cellular_component	GO:0016787//hydrolase activity;GO:0004806//triglyceride lipase activity;GO:0052689//carboxylic ester hydrolase activity;GO:0003674//molecular_function	GO:0006629//lipid metabolic process;GO:0008150//biological_process
ENSDARG00000021339	2047.5	17381	228.35	1963.61	3.10419	4.90337e-49	3.75973e-46	yes	cpa5	carboxypeptidase A5 [Source:ZFIN;Acc:ZDB-GENE-020514-1]	-	-	GO:0004180//carboxypeptidase activity;GO:0016787//hydrolase activity;GO:0008233//peptidase activity;GO:0004181//metallocarboxypeptidase activity;GO:0008270//zinc ion binding;GO:0003674//molecular_function;GO:0043167//ion binding	GO:0006508//proteolysis;GO:0008150//biological_process
ENSDARG00000044976	16.5	141	1.49	12.605	3.08061	2.9438e-13	3.45697e-11	yes	krt93	keratin 93 [Source:ZFIN;Acc:ZDB-GENE-060421-4592]	-	GO:0005882//intermediate filament;GO:0005575//cellular_component;GO:0005622//intracellular;GO:0005623//cell;GO:0005856//cytoskeleton;GO:0043226//organelle;GO:0043234//protein complex	GO:0005198//structural molecule activity;GO:0003674//molecular_function	GO:0008150//biological_process;GO:0008150//biological_process
ENSDARG00000029890	4	33	0.71	5.96	3.06942	6.30619e-08	3.79682e-06	yes	si:dkeyp-86f7.4	-	-	-	GO:0003674//molecular_function;GO:0043167//ion binding	-
ENSDARG00000043722	457	3794	48.945	410.72	3.06892	1.73896e-52	1.56327e-49	yes	cpa4	carboxypeptidase A4 [Source:ZFIN;Acc:ZDB-GENE-040704-61]	-	GO:0005575//cellular_component;GO:0005575//cellular_component	GO:0016787//hydrolase activity;GO:0008233//peptidase activity;GO:0004181//metallocarboxypeptidase activity;GO:0008270//zinc ion binding;GO:0004180//carboxypeptidase activity;GO:0003674//molecular_function;GO:0043167//ion binding	GO:0006508//proteolysis;GO:0008150//biological_process
ENSDARG00000017780	108.5	865.5	2.285	18.915	3.04926	7.4771e-28	2.24055e-25	yes	rorcb	RAR-related orphan receptor C b [Source:ZFIN;Acc:ZDB-GENE-040724-215]	-	GO:0005634//nucleus;GO:0005575//cellular_component;GO:0005622//intracellular;GO:0005623//cell;GO:0043226//organelle	GO:0003677//DNA binding;GO:0003700//sequence-specific DNA binding transcription factor activity;GO:0003707//steroid hormone receptor activity;GO:0008270//zinc ion binding;GO:0046872//metal ion binding;GO:0043565//sequence-specific DNA binding;GO:0004879//ligand-activated sequence-specific DNA binding RNA polymerase II transcription factor activity;GO:0001071//nucleic acid binding transcription fa…	GO:0006355//regulation of transcription, DNA-templated;GO:0043401//steroid hormone mediated signaling pathway;GO:0006351//transcription, DNA-templated;GO:0008150//biological_process;GO:0009058//biosynthetic process;GO:0034641//cellular nitrogen compound metabolic process;GO:0007165//signal transduction
ENSDARG00000076122	1.5	12	0.145	1.19	3.03684	0.000419207	0.00827431	yes	si:ch211-160b11.4	-	-	-	-	-
ENSDARG00000102692	46	414	3.35	27.085	3.01526	2.16696e-29	7.15098e-27	yes	TGM1 (6 of 7)	-	-	-	-	-
ENSDARG00000058570	3	23.5	1.65	13.305	3.01143	2.95706e-06	0.000121021	yes	ccl27a	-	-	GO:0005576//extracellular region;GO:0005615//extracellular space;GO:0005575//cellular_component	GO:0008009//chemokine activity;GO:0005125//cytokine activity;GO:0003674//molecular_function	GO:0006955//immune response;GO:0006935//chemotaxis;GO:0008150//biological_process;GO:0040011//locomotion;GO:0002376//immune system process
ENSDARG00000056719	48	386.5	2.555	20.57	3.00915	2.08456e-28	6.46959e-26	yes	slc6a19b	solute carrier family 6 (neutral amino acid transporter), member 19b [Source:ZFIN;Acc:ZDB-GENE-030131-4755]	-	GO:0016021//integral component of membrane;GO:0016020//membrane;GO:0005575//cellular_component	GO:0015293//symporter activity;GO:0005328//neurotransmitter:sodium symporter activity;GO:0003674//molecular_function;GO:0022857//transmembrane transporter activity	GO:0006810//transport;GO:0006836//neurotransmitter transport;GO:0008150//biological_process
ENSDARG00000097094	1	8	0.13	1.04	3	0.0034265	0.0428025	yes	-	-	-	-	-	-
ENSDARG00000074547	2.5	19.5	1.295	10.355	2.9993	1.56035e-05	0.000514915	yes	si:ch211-240l19.8	-	-	-	-	-
ENSDARG00000055539	263	2071.5	76.62	610.63	2.99451	2.97473e-47	2.04082e-44	yes	epdl2	-	-	-	GO:0003674//molecular_function;GO:0043167//ion binding	GO:0007155//cell adhesion;GO:0008150//biological_process
ENSDARG00000007769	6	47.5	0.555	4.41	2.99022	9.85952e-10	7.76549e-08	yes	sult5a1	-	-	GO:0005575//cellular_component;GO:0005575//cellular_component	GO:0018721;GO:0018724;GO:0018727;GO:0050694//galactose 3-O-sulfotransferase activity;GO:0080131//hydroxyjasmonate sulfotransferase activity;GO:0001537//N-acetylgalactosamine 4-O-sulfotransferase activity;GO:0016232//HNK-1 sulfotransferase activity;GO:0018722;GO:0018725;GO:0019111;GO:0050698//proteoglycan sulfotransferase activity;GO:0004394//heparan sulfate 2-O-sulfotransferase activity;GO:000814…	-
ENSDARG00000077875	2	16	0.14	1.1	2.974	0.000113275	0.00277284	yes	slc2a5	-	-	-	-	-
ENSDARG00000100432	1.5	11.5	0.325	2.535	2.96347	0.000595254	0.0109053	yes	CCL20	-	-	-	-	-
ENSDARG00000056798	1	9.5	0.105	0.815	2.95641	0.000948626	0.0159553	yes	zgc:123297	-	-	GO:0016021//integral component of membrane;GO:0016020//membrane;GO:0005575//cellular_component	GO:0003674//molecular_function;GO:0003674//molecular_function	GO:0008150//biological_process;GO:0008150//biological_process
ENSDARG00000037738	15	116.5	0.325	2.505	2.9463	5.25273e-13	5.97986e-11	yes	fbxl3l	-	-	-	-	-
ENSDARG00000097157	87	649.5	24.35	184.745	2.92354	2.85684e-31	1.00646e-28	yes	si:ch211-207n23.2	-	-	-	-	-
ENSDARG00000045834	24.5	182.5	9.075	68.675	2.91982	8.19531e-20	1.52608e-17	yes	si:dkey-14d8.7	-	-	-	-	-
ENSDARG00000025595	94	716	8.705	65.785	2.91784	7.31984e-35	3.18047e-32	yes	agmo	-	-	-	-	-
ENSDARG00000056498	88.5	658	19.415	145.94	2.91013	8.59917e-35	3.67509e-32	yes	crp	-	-	-	-	-
ENSDARG00000095633	20.5	152	2.285	17.055	2.89993	5.52784e-15	7.4284e-13	yes	si:ch211-133l5.7	-	-	-	-	-
ENSDARG00000096381	1.5	11	0.2	1.485	2.89239	0.00223182	0.0310147	yes	neu3.4	sialidase 3 (membrane sialidase), tandem duplicate 4 [Source:ZFIN;Acc:ZDB-GENE-071220-1]	ko00600//Sphingolipid metabolism;ko00511//Other glycan degradation	-	GO:0004308//exo-alpha-sialidase activity;GO:0003674//molecular_function;GO:0016798//hydrolase activity, acting on glycosyl bonds	-
ENSDARG00000087143	11	80.5	1.1	8.07	2.87507	1.9002e-12	2.03026e-10	yes	serpina7	serpin peptidase inhibitor, clade A (alpha-1 antiproteinase, antitrypsin), member 7 [Source:ZFIN;Acc:ZDB-GENE-041010-47]	-	-	GO:0003674//molecular_function;GO:0030234//enzyme regulator activity;GO:0003674//molecular_function;GO:0030234//enzyme regulator activity	-
ENSDARG00000099470	222	1640	1.77	12.955	2.87169	1.47731e-24	3.56605e-22	yes	muc5.3	-	-	-	-	-
ENSDARG00000078455	2.5	18	0.375	2.73	2.86394	2.35667e-05	0.000737557	yes	best4	-	-	-	-	-
ENSDARG00000021172	59	491	6.025	43.735	2.85976	2.79806e-32	1.04208e-29	yes	cyp2ad2	cytochrome P450, family 2, subfamily AD, polypeptide 2 [Source:ZFIN;Acc:ZDB-GENE-020812-2]	-	GO:0043231//intracellular membrane-bounded organelle;GO:0005737//cytoplasm;GO:0005575//cellular_component;GO:0005622//intracellular;GO:0005623//cell;GO:0005737//cytoplasm;GO:0043226//organelle	GO:0016491//oxidoreductase activity;GO:0004497//monooxygenase activity;GO:0016705//oxidoreductase activity, acting on paired donors, with incorporation or reduction of molecular oxygen;GO:0020037//heme binding;GO:0005506//iron ion binding;GO:0046872//metal ion binding;GO:0016712//oxidoreductase activity, acting on paired donors, with incorporation or reduction of molecular oxygen, reduced flavin …	GO:0055114//oxidation-reduction process;GO:0006805//xenobiotic metabolic process;GO:0019369//arachidonic acid metabolic process;GO:0042738//exogenous drug catabolic process;GO:0008150//biological_process;GO:0009056//catabolic process;GO:0006629//lipid metabolic process;GO:0044281//small molecule metabolic process
ENSDARG00000098736	5.5	37.5	0.255	1.835	2.84721	4.34018e-08	2.69401e-06	yes	si:dkey-201i2.4	-	-	-	-	-
ENSDARG00000073742	6346.5	44922	1272.6	9118.15	2.84097	3.69638e-45	2.35036e-42	yes	prss59.2	protease, serine, 59, tandem duplicate 2 [Source:ZFIN;Acc:ZDB-GENE-110408-10]	-	GO:0005615//extracellular space;GO:0005575//cellular_component;GO:0005576//extracellular region;GO:0005615//extracellular space	GO:0016787//hydrolase activity;GO:0008236//serine-type peptidase activity;GO:0004252//serine-type endopeptidase activity;GO:0008233//peptidase activity;GO:0003674//molecular_function	GO:0006508//proteolysis;GO:0008150//biological_process
ENSDARG00000090361	42	297.5	2.775	19.825	2.83676	9.71554e-25	2.36714e-22	yes	CU633981.1	-	-	-	-	-
ENSDARG00000046091	21	148.5	1.09	7.76	2.83173	2.76218e-17	4.2863e-15	yes	si:ch211-283g2.1	si:ch211-283g2.1 [Source:ZFIN;Acc:ZDB-GENE-060531-57]	-	GO:0005575//cellular_component	GO:0003674//molecular_function;GO:0022857//transmembrane transporter activity	GO:0006810//transport;GO:0008150//biological_process
ENSDARG00000037551	68.5	455	6.73	47.895	2.8312	2.76297e-27	8.09333e-25	yes	pm20d1.1	-	-	-	-	-
ENSDARG00000091126	1.5	10.5	0.35	2.45	2.80735	0.00188395	0.0275306	yes	rnf207a	-	-	-	-	-
ENSDARG00000092788	23	156	5.51	38.55	2.80661	5.2337e-17	7.88686e-15	yes	si:dkey-21e2.15	-	-	-	-	-
ENSDARG00000069381	20.5	144.5	5.85	40.625	2.79586	1.24376e-15	1.75269e-13	yes	si:ch211-125e6.5	-	-	-	-	-
ENSDARG00000026764	21	142	1.95	13.52	2.79355	1.80685e-16	2.69169e-14	yes	ahsg1	alpha-2-HS-glycoprotein 1 [Source:ZFIN;Acc:ZDB-GENE-041114-50]	-	-	GO:0004869//cysteine-type endopeptidase inhibitor activity;GO:0003674//molecular_function;GO:0030234//enzyme regulator activity	-
ENSDARG00000101629	563	3874.5	17.525	121.155	2.78937	1.81772e-44	1.12828e-41	yes	CABZ01079192.1	-	-	-	-	-
ENSDARG00000094570	5	42	0.215	1.47	2.77341	1.14418e-07	6.5271e-06	yes	si:ch211-226h7.2	-	-	-	-	-
XLOC_017221	2.5	17	0.365	2.495	2.77307	5.47335e-05	0.00150517	yes	TCONS_00042447	PREDICTED: stonustoxin subunit beta-like, partial [Danio rerio]	-	-	-	-
ENSDARG00000058218	19	128.5	1.075	7.255	2.75464	2.33616e-13	2.781e-11	yes	fam151a	-	-	-	-	-
XLOC_016881	1.5	10	0.235	1.565	2.73543	0.00246904	0.0335599	yes	TCONS_00041679	LOC100145015 protein [Xenopus (Silurana) tropicalis]	-	-	-	-
ENSDARG00000091715	35.5	234	0.355	2.36	2.7329	1.26503e-20	2.42495e-18	yes	si:dkey-162h11.2	-	-	-	-	-
ENSDARG00000094951	4	26	0.155	1.03	2.7323	2.03599e-05	0.000652066	yes	BX072532.2	-	-	-	-	-
ENSDARG00000040277	33	218	3.67	24.345	2.72977	3.03825e-19	5.42515e-17	yes	fbxo32	F-box protein 32 [Source:ZFIN;Acc:ZDB-GENE-040426-1040]	-	GO:0005575//cellular_component;GO:0005575//cellular_component	-	-
ENSDARG00000023151	935	5768.5	76.95	505.675	2.71622	1.96743e-36	9.67754e-34	yes	ucp1	uncoupling protein 1 [Source:ZFIN;Acc:ZDB-GENE-010503-1]	-	GO:0016020//membrane;GO:0031966//mitochondrial membrane;GO:0016021//integral component of membrane;GO:0005575//cellular_component;GO:0005622//intracellular;GO:0005623//cell;GO:0005737//cytoplasm;GO:0005739//mitochondrion;GO:0043226//organelle	-	GO:0006839//mitochondrial transport;GO:0071391//cellular response to estrogen stimulus;GO:0006810//transport;GO:0008150//biological_process
ENSDARG00000103199	187	1033.5	36.15	236.54	2.71002	3.55916e-28	1.09162e-25	yes	si:dkey-247k7.2	-	-	-	-	-
ENSDARG00000101956	2	13	0.2	1.295	2.69488	0.000488155	0.00927565	yes	CU571315.2	-	-	-	-	-
ENSDARG00000006588	298.5	1879.5	22.04	141.68	2.68444	7.07235e-36	3.29243e-33	yes	zgc:111983	-	-	GO:0005575//cellular_component;GO:0005575//cellular_component	GO:0003674//molecular_function;GO:0003674//molecular_function	GO:0008150//biological_process;GO:0008150//biological_process
ENSDARG00000043093	31.5	199	1.595	10.205	2.67765	3.93731e-17	6.00266e-15	yes	mpeg1.2	macrophage expressed 1, tandem duplicate 2 [Source:ZFIN;Acc:ZDB-GENE-050522-305]	-	GO:0005575//cellular_component;GO:0005575//cellular_component	GO:0003674//molecular_function;GO:0003674//molecular_function	GO:0008150//biological_process;GO:0008150//biological_process
ENSDARG00000098805	173.5	1125	9.09	57.995	2.67358	3.30575e-25	8.44911e-23	yes	si:ch73-109d9.5	-	-	-	-	-
XLOC_029445	21	132	3.2	20.405	2.67278	9.61936e-15	1.28603e-12	yes	TCONS_00070031	PREDICTED: ATP-binding cassette sub-family A member 1-like, partial [Danio rerio]	ko02010//ABC transporters;ko04975//Fat digestion and absorption	-	-	-
ENSDARG00000069630	49.5	314	3.4	21.68	2.67276	4.98246e-23	1.10079e-20	yes	tat	tyrosine aminotransferase [Source:ZFIN;Acc:ZDB-GENE-030131-1144]	ko01100//Metabolic pathways;ko00270//Cysteine and methionine metabolism;ko00350//Tyrosine metabolism;ko00360//Phenylalanine metabolism;ko00130//Ubiquinone and other terpenoid-quinone biosynthesis;ko00400//Phenylalanine, tyrosine and tryptophan biosynthesis	GO:0005575//cellular_component;GO:0005575//cellular_component	GO:0016740//transferase activity;GO:0030170//pyridoxal phosphate binding;GO:0003824//catalytic activity;GO:0004838//L-tyrosine:2-oxoglutarate aminotransferase activity;GO:0008483//transaminase activity;GO:0003674//molecular_function;GO:0043167//ion binding	GO:0009058//biosynthetic process;GO:0006520//cellular amino acid metabolic process;GO:0009072//aromatic amino acid family metabolic process;GO:0008150//biological_process;GO:0044281//small molecule metabolic process
ENSDARG00000074642	23.5	145.5	0.75	4.775	2.67054	7.20144e-12	7.33365e-10	yes	zgc:153932	-	-	-	-	-
ENSDARG00000041919	2	10.5	0.615	3.875	2.65554	0.00368994	0.0452053	yes	ccl38.1	-	-	GO:0005576//extracellular region;GO:0005615//extracellular space;GO:0005575//cellular_component	GO:0008009//chemokine activity;GO:0005125//cytokine activity;GO:0003674//molecular_function	GO:0006955//immune response;GO:0006935//chemotaxis;GO:0008150//biological_process;GO:0040011//locomotion;GO:0002376//immune system process
ENSDARG00000101567	11	77.5	0.4	2.52	2.65535	3.30598e-11	3.12272e-09	yes	guca1e	-	-	-	GO:0030250//guanylate cyclase activator activity;GO:0008048//calcium sensitive guanylate cyclase activator activity;GO:0005509//calcium ion binding;GO:0046872//metal ion binding;GO:0003674//molecular_function;GO:0043167//ion binding;GO:0030234//enzyme regulator activity	-
ENSDARG00000005913	81.5	513	3.505	22.02	2.65133	1.05516e-22	2.21838e-20	yes	TGM1 (1 of 7)	-	-	-	-	-
ENSDARG00000033587	1.5	9.5	0.14	0.875	2.64386	0.00333348	0.0419099	yes	CABZ01088134.1	-	-	-	-	-
ENSDARG00000101595	6.5	39.5	0.325	2.03	2.64297	5.6259e-08	3.4268e-06	yes	tgm1l2	-	-	-	GO:0003810//protein-glutamine gamma-glutamyltransferase activity;GO:0003674//molecular_function;GO:0016746//transferase activity, transferring acyl groups	GO:0018149//peptide cross-linking;GO:0006464//cellular protein modification process;GO:0008150//biological_process
ENSDARG00000068290	5	31.5	0.32	1.995	2.64024	3.62101e-05	0.00106186	yes	wu:fd49b10	-	-	-	-	-
ENSDARG00000006447	5	33.5	0.385	2.395	2.6371	5.12092e-07	2.5429e-05	yes	slc19a3a	-	-	-	-	GO:0006810//transport;GO:0008150//biological_process
ENSDARG00000041554	12	73.5	1.155	7.09	2.61789	2.14892e-09	1.62855e-07	yes	unc93a	-	-	-	-	-
ENSDARG00000006308	5.5	22	0.31	1.875	2.59655	0.000455062	0.00881881	yes	ptpn18	protein tyrosine phosphatase, non-receptor type 18 [Source:ZFIN;Acc:ZDB-GENE-050320-12]	-	-	GO:0016787//hydrolase activity;GO:0016791//phosphatase activity;GO:0004721//phosphoprotein phosphatase activity;GO:0004725//protein tyrosine phosphatase activity;GO:0003674//molecular_function	GO:0016311//dephosphorylation;GO:0006470//protein dephosphorylation;GO:0006464//cellular protein modification process;GO:0008150//biological_process
ENSDARG00000074712	2.5	15.5	0.31	1.87	2.5927	0.000161362	0.003783	yes	si:ch211-186e20.2	si:ch211-186e20.2 [Source:ZFIN;Acc:ZDB-GENE-110407-8]	-	-	GO:0003674//molecular_function;GO:0030234//enzyme regulator activity	-
ENSDARG00000040004	3.5	21.5	0.035	0.21	2.58496	2.47915e-05	0.000771257	yes	PKHD1L1 (1 of 2)	-	-	-	-	-
ENSDARG00000077874	2	11.5	0.12	0.715	2.57491	0.00184233	0.027059	yes	si:dkey-265k11.2	-	-	-	-	-
ENSDARG00000054534	10	59	0.775	4.585	2.56465	6.12844e-09	4.37721e-07	yes	ACOT12	-	-	-	-	-
XLOC_029446	14	81.5	2.03	11.945	2.55686	1.71373e-10	1.45527e-08	yes	TCONS_00070032	PREDICTED: ATP-binding cassette sub-family A member 1-like, partial [Danio rerio]	ko02010//ABC transporters;ko04975//Fat digestion and absorption	-	-	-
ENSDARG00000088082	3	20	0.165	0.97	2.55552	4.70021e-05	0.00132184	yes	si:ch211-214c20.1	-	-	-	-	-
ENSDARG00000086248	3.5	20.5	0.42	2.465	2.55313	4.07007e-05	0.00117635	yes	kcnj1a.3	potassium inwardly-rectifying channel, subfamily J, member 1a, tandem duplicate 3 [Source:ZFIN;Acc:ZDB-GENE-050420-256]	-	GO:0016021//integral component of membrane;GO:0016020//membrane;GO:0005887//integral component of plasma membrane;GO:0005575//cellular_component;GO:0005623//cell;GO:0005886//plasma membrane	GO:0005244//voltage-gated ion channel activity;GO:0005242//inward rectifier potassium channel activity;GO:0015272//ATP-activated inward rectifier potassium channel activity;GO:0003674//molecular_function;GO:0022857//transmembrane transporter activity	GO:0006813//potassium ion transport;GO:0034765//regulation of ion transmembrane transport;GO:0006810//transport;GO:0010107//potassium ion import;GO:0006811//ion transport;GO:0008150//biological_process;GO:0055085//transmembrane transport
XLOC_000532	7.5	43.5	2.215	12.985	2.55147	1.41202e-06	6.27894e-05	yes	TCONS_00001495	PREDICTED: protocadherin Fat 4 [Danio rerio]	-	-	-	-
ENSDARG00000004964	62	373	5.705	33.415	2.5502	5.70329e-21	1.11793e-18	yes	cyp4t8	cytochrome P450, family 4, subfamily T, polypeptide 8 [Source:ZFIN;Acc:ZDB-GENE-031219-3]	-	-	GO:0016491//oxidoreductase activity;GO:0004497//monooxygenase activity;GO:0016705//oxidoreductase activity, acting on paired donors, with incorporation or reduction of molecular oxygen;GO:0005506//iron ion binding;GO:0046872//metal ion binding;GO:0020037//heme binding;GO:0003674//molecular_function;GO:0043167//ion binding	GO:0055114//oxidation-reduction process;GO:0008150//biological_process
XLOC_011994	8	42.5	1.755	10.225	2.54256	3.81194e-07	1.95624e-05	yes	TCONS_00029679	PREDICTED: zinc transporter ZIP4-like [Danio rerio]	ko04978//Mineral absorption;ko04978//Mineral absorption	-	-	-
ENSDARG00000102720	2	11.5	0.255	1.465	2.52233	0.00154106	0.0235771	yes	zgc:123284	zgc:123284 [Source:ZFIN;Acc:ZDB-GENE-051113-92]	-	GO:0005575//cellular_component;GO:0005575//cellular_component	GO:0016491//oxidoreductase activity;GO:0003674//molecular_function	GO:0008152//metabolic process;GO:0008150//biological_process
ENSDARG00000056781	470.5	2702.5	8.49	48.625	2.51786	1.22083e-32	4.82227e-30	yes	ZAN	-	-	-	-	-
ENSDARG00000037191	42.5	238.5	9.815	56.065	2.51404	1.13748e-17	1.79721e-15	yes	ttr	-	-	GO:0005576//extracellular region;GO:0005575//cellular_component	GO:0070324//thyroid hormone binding;GO:0005179//hormone activity;GO:0003674//molecular_function	GO:0042572//retinol metabolic process;GO:0070327//thyroid hormone transport;GO:0006810//transport;GO:0008150//biological_process;GO:0006629//lipid metabolic process;GO:0044281//small molecule metabolic process
ENSDARG00000088263	13	71.5	1.4	7.89	2.4946	3.18729e-10	2.63786e-08	yes	zgc:174356	-	-	-	-	-
ENSDARG00000092552	2	11	0.93	5.24	2.49426	0.00202897	0.0291594	yes	fndc7rs2	-	-	-	-	-
ENSDARG00000006522	12.5	69	0.82	4.615	2.49263	2.17633e-08	1.43638e-06	yes	otop2	-	-	-	-	-
ENSDARG00000068387	10.5	58	0.695	3.91	2.49208	2.25602e-08	1.48148e-06	yes	slc6a18	solute carrier family 6 (neutral amino acid transporter), member 18 [Source:ZFIN;Acc:ZDB-GENE-080219-9]	-	GO:0016020//membrane;GO:0005887//integral component of plasma membrane;GO:0016021//integral component of membrane;GO:0005575//cellular_component;GO:0005623//cell;GO:0005886//plasma membrane;GO:0016020//membrane;GO:0005887//integral component of plasma membrane;GO:0016021//integral component of membrane;GO:0005575//cellular_component;GO:0005623//cell;GO:0005886//plasma membrane	GO:0015293//symporter activity;GO:0005328//neurotransmitter:sodium symporter activity;GO:0003674//molecular_function;GO:0022857//transmembrane transporter activity;GO:0015293//symporter activity;GO:0005328//neurotransmitter:sodium symporter activity;GO:0003674//molecular_function;GO:0022857//transmembrane transporter activity	GO:0006836//neurotransmitter transport;GO:0006810//transport;GO:0008150//biological_process;GO:0006836//neurotransmitter transport;GO:0006810//transport;GO:0008150//biological_process
ENSDARG00000076196	2	11	0.07	0.39	2.47805	0.00367555	0.0450502	yes	si:ch211-226h7.6	-	-	-	-	-
ENSDARG00000044528	192	1063	9.805	54.395	2.47188	4.23557e-29	1.36323e-26	yes	slc15a1b	solute carrier family 15 (oligopeptide transporter), member 1b [Source:ZFIN;Acc:ZDB-GENE-030131-4661]	-	GO:0016021//integral component of membrane;GO:0016020//membrane;GO:0005575//cellular_component	GO:0005215//transporter activity;GO:0015175//neutral amino acid transmembrane transporter activity;GO:0003674//molecular_function;GO:0022857//transmembrane transporter activity	GO:0006810//transport;GO:0015804//neutral amino acid transport;GO:0006857//oligopeptide transport;GO:0008150//biological_process
ENSDARG00000094077	22.5	119	4.735	26.18	2.46703	1.47307e-12	1.60012e-10	yes	si:dkey-21e2.16	si:dkey-21e2.16 [Source:ZFIN;Acc:ZDB-GENE-050208-698]	-	-	GO:0016787//hydrolase activity;GO:0008236//serine-type peptidase activity;GO:0004252//serine-type endopeptidase activity;GO:0008233//peptidase activity;GO:0003674//molecular_function	GO:0006508//proteolysis;GO:0008150//biological_process
ENSDARG00000007086	10	55.5	0.97	5.36	2.46618	8.31057e-08	4.91285e-06	yes	aqp10a	-	-	GO:0016021//integral component of membrane;GO:0005887//integral component of plasma membrane;GO:0016020//membrane;GO:0005575//cellular_component;GO:0005623//cell;GO:0005886//plasma membrane	GO:0015105//arsenite transmembrane transporter activity;GO:0005372//water transmembrane transporter activity;GO:0015168//glycerol transmembrane transporter activity;GO:0005215//transporter activity;GO:0015254//glycerol channel activity;GO:0015250//water channel activity;GO:0015204//urea transmembrane transporter activity;GO:0003674//molecular_function;GO:0022857//transmembrane transporter activity	GO:0009992//cellular water homeostasis;GO:0006810//transport;GO:0071918//urea transmembrane transport;GO:0008150//biological_process;GO:0055085//transmembrane transport;GO:0042592//homeostatic process
ENSDARG00000020994	90.5	493.5	4.56	25.035	2.45684	6.55116e-26	1.76071e-23	yes	wu:fb63a08	-	-	-	-	-
ENSDARG00000012829	77.5	419	3.675	19.98	2.44274	6.92394e-24	1.59741e-21	yes	asah2	N-acylsphingosine amidohydrolase 2 [Source:ZFIN;Acc:ZDB-GENE-041112-1]	ko01100//Metabolic pathways;ko00600//Sphingolipid metabolism	GO:0005575//cellular_component;GO:0005623//cell;GO:0005886//plasma membrane;GO:0005622//intracellular;GO:0005737//cytoplasm;GO:0005794//Golgi apparatus;GO:0043226//organelle;GO:0005783//endoplasmic reticulum	GO:0003674//molecular_function;GO:0016810//hydrolase activity, acting on carbon-nitrogen (but not peptide) bonds	GO:0006629//lipid metabolic process;GO:0008150//biological_process;GO:0034641//cellular nitrogen compound metabolic process
ENSDARG00000071604	2	11	0.06	0.325	2.43741	0.0030226	0.0390676	yes	si:ch211-156p11.1	-	-	-	-	-
ENSDARG00000089362	42.5	229.5	3.815	20.605	2.43324	3.01814e-15	4.16312e-13	yes	grn1	-	-	-	-	-
ENSDARG00000034095	10	32	1.24	6.675	2.42843	0.000392357	0.00783812	yes	si:dkey-59l11.10	-	-	-	-	-
ENSDARG00000102758	7	37	0.735	3.935	2.42055	7.77737e-07	3.69993e-05	yes	FO704661.1	-	-	-	-	-
ENSDARG00000101749	18	90.5	1.85	9.86	2.41406	4.69903e-10	3.79268e-08	yes	zgc:92161	zgc:92161 [Source:ZFIN;Acc:ZDB-GENE-040912-22]	-	GO:0005575//cellular_component;GO:0005575//cellular_component	GO:0016491//oxidoreductase activity;GO:0003674//molecular_function	GO:0008152//metabolic process;GO:0008150//biological_process
ENSDARG00000102888	126.5	659.5	6.585	34.995	2.40989	2.39015e-16	3.52041e-14	yes	gpr39	G protein-coupled receptor 39 [Source:ZFIN;Acc:ZDB-GENE-040426-1395]	-	GO:0016021//integral component of membrane;GO:0016020//membrane;GO:0005575//cellular_component;GO:0016021//integral component of membrane;GO:0016020//membrane;GO:0005575//cellular_component	GO:0004871//signal transducer activity;GO:0004930//G-protein coupled receptor activity;GO:0003674//molecular_function;GO:0004871//signal transducer activity;GO:0004930//G-protein coupled receptor activity;GO:0003674//molecular_function	GO:0007186//G-protein coupled receptor signaling pathway;GO:0007165//signal transduction;GO:0008150//biological_process;GO:0007186//G-protein coupled receptor signaling pathway;GO:0007165//signal transduction;GO:0008150//biological_process
ENSDARG00000100280	7.5	34.5	0.115	0.61	2.40718	5.2159e-06	0.000199382	yes	znfx1	-	-	GO:0005634//nucleus;GO:0005575//cellular_component;GO:0005622//intracellular;GO:0005623//cell;GO:0043226//organelle	GO:0000166//nucleotide binding;GO:0005524//ATP binding;GO:0003700//sequence-specific DNA binding transcription factor activity;GO:0008270//zinc ion binding;GO:0003674//molecular_function;GO:0043167//ion binding;GO:0001071//nucleic acid binding transcription factor activity	GO:0006355//regulation of transcription, DNA-templated;GO:0008150//biological_process
ENSDARG00000089399	96.5	506	18.08	95.62	2.40292	4.07691e-24	9.66229e-22	yes	tmem176l.2	-	-	-	-	-
ENSDARG00000102710	2	10.5	0.49	2.58	2.39652	0.00332611	0.0418493	yes	-	-	-	-	-	-
ENSDARG00000052012	11	44.5	0.455	2.38	2.38702	3.22786e-06	0.000130062	yes	rtn4rl2a	-	-	-	GO:0005515//protein binding;GO:0003674//molecular_function	GO:0048916//posterior lateral line development;GO:0048922//posterior lateral line neuromast deposition;GO:0008150//biological_process;GO:0048856//anatomical structure development
ENSDARG00000043237	77	398	5.27	27.5	2.38356	4.95371e-21	9.85826e-19	yes	nfil3-2	nuclear factor, interleukin 3 regulated, member 2 [Source:ZFIN;Acc:ZDB-GENE-110929-1]	-	-	GO:0043565//sequence-specific DNA binding;GO:0003700//sequence-specific DNA binding transcription factor activity;GO:0001071//nucleic acid binding transcription factor activity;GO:0003674//molecular_function;GO:0003677//DNA binding	GO:0006355//regulation of transcription, DNA-templated;GO:0008150//biological_process
ENSDARG00000054343	2.5	13	0.165	0.855	2.37346	0.00117926	0.0190126	yes	SLC7A8 (1 of 2)	-	-	-	-	-
ENSDARG00000013871	191.5	1012.5	12.56	64.93	2.37005	1.50865e-28	4.73861e-26	yes	slc5a1	solute carrier family 5 (sodium/glucose cotransporter), member 1 [Source:ZFIN;Acc:ZDB-GENE-040426-1524]	-	GO:0016021//integral component of membrane;GO:0016020//membrane;GO:0005575//cellular_component	GO:0005215//transporter activity;GO:0003674//molecular_function	GO:0006810//transport;GO:0055085//transmembrane transport;GO:0008150//biological_process
ENSDARG00000091431	2.5	12.5	0.415	2.125	2.35628	0.00181259	0.0266974	yes	CR352285.1	-	-	-	-	-
ENSDARG00000101479	6	30	2.64	13.49	2.35328	0.000283374	0.00604675	yes	BX908782.3	-	-	-	-	-
ENSDARG00000076997	4.5	22	0.275	1.405	2.35307	6.38199e-05	0.00171879	yes	stxbp4	-	-	-	-	-
ENSDARG00000090996	14	70	1.8	9.085	2.33549	1.96453e-09	1.49752e-07	yes	PARM1	-	-	-	-	-
ENSDARG00000052158	3	14.5	0.115	0.58	2.33442	0.00102323	0.0170125	yes	il23r	-	-	-	-	-
ENSDARG00000075958	29.5	147	3.88	19.56	2.33378	1.07702e-11	1.06926e-09	yes	si:dkey-266f7.9	si:dkey-266f7.9 [Source:ZFIN;Acc:ZDB-GENE-070705-440]	ko00562//Inositol phosphate metabolism	-	GO:0008081//phosphoric diester hydrolase activity;GO:0003674//molecular_function	GO:0006629//lipid metabolic process;GO:0008150//biological_process
ENSDARG00000091131	157	865	11.155	55.99	2.32748	4.98135e-25	1.24869e-22	yes	cry2b	cryptochrome 2b [Source:ZFIN;Acc:ZDB-GENE-010426-5]	-	-	GO:0003913//DNA photolyase activity;GO:0003674//molecular_function;GO:0016829//lyase activity	GO:0045892//negative regulation of transcription, DNA-templated;GO:0006281//DNA repair;GO:0006259//DNA metabolic process;GO:0006950//response to stress;GO:0008150//biological_process;GO:0034641//cellular nitrogen compound metabolic process
ENSDARG00000045863	4.5	22	0.365	1.815	2.314	0.000181424	0.00415616	yes	asb15b	ankyrin repeat and SOCS box containing 15b [Source:ZFIN;Acc:ZDB-GENE-041210-265]	-	-	-	GO:0016567//protein ubiquitination;GO:0035556//intracellular signal transduction;GO:0007165//signal transduction;GO:0008150//biological_process;GO:0006464//cellular protein modification process
ENSDARG00000104593	44	219	2.575	12.765	2.30955	2.67811e-12	2.83432e-10	yes	cyp2k18	cytochrome P450, family 2, subfamily K, polypeptide 18 [Source:ZFIN;Acc:ZDB-GENE-040426-1584]	-	GO:0005737//cytoplasm;GO:0043231//intracellular membrane-bounded organelle;GO:0005575//cellular_component;GO:0005622//intracellular;GO:0005623//cell;GO:0043226//organelle;GO:0005737//cytoplasm	GO:0016712//oxidoreductase activity, acting on paired donors, with incorporation or reduction of molecular oxygen, reduced flavin or flavoprotein as one donor, and incorporation of one atom of oxygen;GO:0019825//oxygen binding;GO:0016705//oxidoreductase activity, acting on paired donors, with incorporation or reduction of molecular oxygen;GO:0020037//heme binding;GO:0005506//iron ion binding;GO:0…	GO:0055114//oxidation-reduction process;GO:0006082//organic acid metabolic process;GO:0006805//xenobiotic metabolic process;GO:0042738//exogenous drug catabolic process;GO:0008150//biological_process;GO:0009056//catabolic process;GO:0044281//small molecule metabolic process
ENSDARG00000060350	727	3550	132.57	655.17	2.30511	9.61655e-31	3.29873e-28	yes	apoda.2	-	-	GO:0005576//extracellular region;GO:0005575//cellular_component	GO:0005215//transporter activity;GO:0036094//small molecule binding;GO:0008289//lipid binding;GO:0003674//molecular_function	GO:0006810//transport;GO:0008150//biological_process
ENSDARG00000062873	3.5	18.5	0.32	1.58	2.30378	0.000119624	0.00292278	yes	slc2a11l	-	-	GO:0016021//integral component of membrane;GO:0016020//membrane;GO:0005887//integral component of plasma membrane;GO:0005575//cellular_component;GO:0005623//cell;GO:0005886//plasma membrane	GO:0022857//transmembrane transporter activity;GO:0005351//sugar:proton symporter activity;GO:0005355//glucose transmembrane transporter activity;GO:0022891//substrate-specific transmembrane transporter activity;GO:0005215//transporter activity;GO:0003674//molecular_function	GO:0035428//hexose transmembrane transport;GO:0055085//transmembrane transport;GO:0046323//glucose import;GO:0006810//transport;GO:0008150//biological_process
ENSDARG00000041433	49.5	245	6.955	33.825	2.28197	7.31974e-13	8.12024e-11	yes	si:dkey-7c18.24	-	-	-	-	-
ENSDARG00000099401	3.5	16.5	2.01	9.765	2.28042	0.000461154	0.0088988	yes	-	-	-	-	-	-
ENSDARG00000009844	47	224.5	6.705	32.24	2.26554	4.28703e-15	5.85146e-13	yes	dusp23a	dual specificity phosphatase 23a [Source:ZFIN;Acc:ZDB-GENE-030131-2554]	-	-	GO:0016791//phosphatase activity;GO:0016787//hydrolase activity;GO:0008138//protein tyrosine/serine/threonine phosphatase activity;GO:0004725//protein tyrosine phosphatase activity;GO:0003674//molecular_function	GO:0006470//protein dephosphorylation;GO:0016311//dephosphorylation;GO:0008150//biological_process;GO:0006464//cellular protein modification process
ENSDARG00000054786	45	214.5	3.675	17.54	2.25483	5.10505e-14	6.52395e-12	yes	faah2b	-	-	-	-	-
ENSDARG00000005565	27.5	132.5	2.055	9.8	2.25364	6.31131e-12	6.47779e-10	yes	entpd8	ectonucleoside triphosphate diphosphohydrolase 8 [Source:ZFIN;Acc:ZDB-GENE-040724-142]	ko00230//Purine metabolism;ko00240//Pyrimidine metabolism	-	GO:0016787//hydrolase activity;GO:0003674//molecular_function	-
XLOC_000533	31.5	149	2.87	13.675	2.25242	1.98404e-10	1.67391e-08	yes	TCONS_00001496	PREDICTED: protocadherin Fat 4 [Danio rerio]	-	-	-	-
ENSDARG00000103992	2.5	11.5	0.085	0.405	2.25239	0.00333415	0.0419099	yes	si:dkey-146m20.14	-	-	-	-	-
ENSDARG00000098949	11	52.5	0.245	1.155	2.23704	1.96888e-07	1.07158e-05	yes	mslna	-	-	-	-	-
ENSDARG00000038666	25.5	119	2.86	13.445	2.23298	5.13615e-11	4.69822e-09	yes	igfbp1b	insulin-like growth factor binding protein 1b [Source:ZFIN;Acc:ZDB-GENE-081210-3]	-	GO:0005615//extracellular space;GO:0005576//extracellular region;GO:0005575//cellular_component;GO:0005615//extracellular space	GO:0005520//insulin-like growth factor binding;GO:0031995//insulin-like growth factor II binding;GO:0031994//insulin-like growth factor I binding;GO:0003674//molecular_function	GO:0001558//regulation of cell growth;GO:0043567//regulation of insulin-like growth factor receptor signaling pathway;GO:0008150//biological_process
ENSDARG00000052905	571	2660.5	37.065	174.01	2.23104	1.28645e-30	4.35557e-28	yes	zgc:165423	-	-	-	-	-
ENSDARG00000018361	37.5	175	3.905	18.225	2.22252	8.4709e-10	6.69201e-08	yes	sult1st3	-	-	-	-	-
ENSDARG00000078876	2.5	11.5	0.945	4.41	2.22239	0.00405944	0.048479	yes	crygm2b	crystallin, gamma M2b [Source:ZFIN;Acc:ZDB-GENE-050516-10]	-	GO:0005575//cellular_component;GO:0005575//cellular_component	GO:0003674//molecular_function;GO:0003674//molecular_function	GO:0008150//biological_process;GO:0008150//biological_process
ENSDARG00000074666	2.5	11.5	0.34	1.575	2.21175	0.00332564	0.0418493	yes	CA4 (4 of 5)	carbonic anhydrase IV [Source:HGNC Symbol;Acc:HGNC:1375]	-	GO:0005575//cellular_component;GO:0005575//cellular_component	GO:0046872//metal ion binding;GO:0008270//zinc ion binding;GO:0004089//carbonate dehydratase activity;GO:0003674//molecular_function;GO:0016829//lyase activity;GO:0043167//ion binding	GO:0006730//one-carbon metabolic process;GO:0008150//biological_process;GO:0044281//small molecule metabolic process
XLOC_000534	17	78	2.965	13.64	2.20174	2.4193e-07	1.29776e-05	yes	TCONS_00001497	PREDICTED: protocadherin Fat 4 [Danio rerio]	-	-	GO:0003824//catalytic activity	-
ENSDARG00000100184	22	99	5.07	23.125	2.1894	3.231e-10	2.66558e-08	yes	BX908782.2	-	-	-	-	-
XLOC_025616	189.5	846	62.805	285.125	2.18264	1.18613e-23	2.7125e-21	yes	TCONS_00060781	fep15 selenoprotein precursor [Danio rerio]	-	-	-	-
ENSDARG00000094965	421.5	1885.5	12.335	55.915	2.18048	5.72386e-16	8.33637e-14	yes	nfil3-5	nuclear factor, interleukin 3 regulated, member 5 [Source:ZFIN;Acc:ZDB-GENE-030131-7677]	-	-	GO:0043565//sequence-specific DNA binding;GO:0003700//sequence-specific DNA binding transcription factor activity;GO:0001071//nucleic acid binding transcription factor activity;GO:0003674//molecular_function;GO:0003677//DNA binding	GO:0006355//regulation of transcription, DNA-templated;GO:0032922//circadian regulation of gene expression;GO:0008150//biological_process
ENSDARG00000093780	5	22.5	0.265	1.195	2.17295	0.000244862	0.00533297	yes	-	-	-	-	-	-
ENSDARG00000010420	168	748	13.385	60.08	2.16627	1.82041e-21	3.65062e-19	yes	ndrg1b	N-myc downstream regulated 1b [Source:ZFIN;Acc:ZDB-GENE-040426-1648]	-	GO:0005737//cytoplasm;GO:0005575//cellular_component;GO:0005622//intracellular;GO:0005623//cell;GO:0005737//cytoplasm	-	GO:0007165//signal transduction;GO:0007165//signal transduction;GO:0008150//biological_process
ENSDARG00000010130	82	404.5	9.055	40.615	2.16523	3.5307e-18	5.7171e-16	yes	smpdl3b	-	-	-	-	-
ENSDARG00000093629	9.5	42	0.615	2.755	2.16339	3.58467e-06	0.000142554	yes	si:ch211-106h4.4	-	-	-	-	-
ENSDARG00000022261	324	1443	19.115	85.49	2.16105	6.65999e-26	1.77169e-23	yes	pdzk1	-	-	-	-	-
ENSDARG00000089310	180.5	804	18.48	82.57	2.15965	5.31113e-23	1.15809e-20	yes	gc	group-specific component (vitamin D binding protein) [Source:ZFIN;Acc:ZDB-GENE-040718-307]	-	GO:0005615//extracellular space;GO:0005575//cellular_component;GO:0005576//extracellular region	GO:0051183//vitamin transporter activity;GO:0005499//vitamin D binding;GO:0003674//molecular_function;GO:0008289//lipid binding	GO:0051180//vitamin transport;GO:0006810//transport;GO:0008150//biological_process
ENSDARG00000007040	9	40	1.165	5.205	2.15957	1.94988e-06	8.37452e-05	yes	tmigd1	-	-	-	-	-
ENSDARG00000068515	158.5	674	10.705	47.82	2.15933	7.8154e-20	1.46581e-17	yes	chs1	-	ko00520//Amino sugar and nucleotide sugar metabolism	-	-	-
ENSDARG00000005894	13	58	1.105	4.91	2.15168	1.15437e-07	6.57082e-06	yes	slc7a9	-	-	-	-	-
ENSDARG00000019532	168.5	743	14.27	63.335	2.15002	1.8291e-23	4.11074e-21	yes	fads2	-	ko03320//PPAR signaling pathway;ko01040//Biosynthesis of unsaturated fatty acids;ko00592//alpha-Linolenic acid metabolism	-	-	-
ENSDARG00000087013	142	630	1.605	7.1	2.14525	4.62695e-19	8.15031e-17	yes	cubn	-	-	-	-	-
ENSDARG00000073820	5	22	0.53	2.325	2.13317	0.000414026	0.00818321	yes	zgc:174917	zgc:174917 [Source:ZFIN;Acc:ZDB-GENE-070928-42]	-	GO:0005575//cellular_component;GO:0005575//cellular_component	GO:0003674//molecular_function;GO:0003674//molecular_function	GO:0008150//biological_process;GO:0008150//biological_process
ENSDARG00000044204	41	182.5	5.205	22.805	2.13138	1.82562e-12	1.9586e-10	yes	endou	-	-	-	-	-
ENSDARG00000003113	702.5	3039	41.23	179.04	2.11852	1.21248e-26	3.39885e-24	yes	ada	-	-	-	-	-
ENSDARG00000014916	28.5	123	2.205	9.555	2.11548	1.67402e-10	1.43088e-08	yes	slc10a2	solute carrier family 10 (sodium/bile acid cotransporter), member 2 [Source:ZFIN;Acc:ZDB-GENE-040426-1328]	-	GO:0016021//integral component of membrane;GO:0005887//integral component of plasma membrane;GO:0016324//apical plasma membrane;GO:0016020//membrane;GO:0005575//cellular_component;GO:0005623//cell;GO:0005886//plasma membrane	GO:0008508//bile acid:sodium symporter activity;GO:0003674//molecular_function;GO:0022857//transmembrane transporter activity	GO:0015721//bile acid and bile salt transport;GO:0006810//transport;GO:0008150//biological_process
ENSDARG00000088245	10	42.5	0.33	1.43	2.11548	1.76466e-06	7.61666e-05	yes	si:dkey-16p6.1	-	-	-	-	-
ENSDARG00000103277	22.5	95.5	1.275	5.525	2.11548	6.17491e-08	3.72639e-06	yes	cyp24a1	cytochrome P450, family 24, subfamily A, polypeptide 1 [Source:ZFIN;Acc:ZDB-GENE-060825-1]	ko01100//Metabolic pathways;ko00100//Steroid biosynthesis	-	GO:0016705//oxidoreductase activity, acting on paired donors, with incorporation or reduction of molecular oxygen;GO:0005506//iron ion binding;GO:0016491//oxidoreductase activity;GO:0004497//monooxygenase activity;GO:0020037//heme binding;GO:0046872//metal ion binding;GO:0003674//molecular_function;GO:0043167//ion binding	GO:0055114//oxidation-reduction process;GO:0008150//biological_process
ENSDARG00000003909	13.5	58	0.96	4.145	2.11027	1.17195e-07	6.64192e-06	yes	ftr01	finTRIM family, member 1 [Source:ZFIN;Acc:ZDB-GENE-070705-491]	-	-	GO:0003674//molecular_function;GO:0043167//ion binding	-
ENSDARG00000010252	6	20.5	0.225	0.965	2.1006	0.00138581	0.0217246	yes	jak3	-	-	-	-	-
ENSDARG00000093600	8.5	31	0.74	3.17	2.09889	0.000313541	0.00650711	yes	omd	-	-	-	-	-
ENSDARG00000079532	4.5	19	0.275	1.175	2.09516	0.00041927	0.00827431	yes	zgc:194242	zgc:194242 [Source:ZFIN;Acc:ZDB-GENE-081022-84]	-	GO:0005737//cytoplasm;GO:0005575//cellular_component;GO:0005622//intracellular;GO:0005623//cell;GO:0005737//cytoplasm	GO:0008757//S-adenosylmethionine-dependent methyltransferase activity;GO:0008168//methyltransferase activity;GO:0003674//molecular_function	GO:0008152//metabolic process;GO:0008150//biological_process
ENSDARG00000098663	4.5	18.5	0.975	4.165	2.09484	0.00098297	0.016448	yes	fgf19	fibroblast growth factor 19 [Source:ZFIN;Acc:ZDB-GENE-030729-32]	ko05200//Pathways in cancer;ko04010//MAPK signaling pathway;ko04810//Regulation of actin cytoskeleton;ko05218//Melanoma	GO:0005576//extracellular region;GO:0005575//cellular_component	GO:0008083//growth factor activity;GO:0005102//receptor binding;GO:0005104//fibroblast growth factor receptor binding;GO:0003674//molecular_function	GO:0007420//brain development;GO:0048665//neuron fate specification;GO:0043010//camera-type eye development;GO:0002088//lens development in camera-type eye;GO:0060041//retina development in camera-type eye;GO:0008284//positive regulation of cell proliferation;GO:0048709//oligodendrocyte differentiation;GO:0031290//retinal ganglion cell axon guidance;GO:0050769//positive regulation of neurogenesis…
ENSDARG00000058327	29	123	1.49	6.35	2.09144	3.63584e-08	2.30624e-06	yes	neu3.3	sialidase 3 (membrane sialidase), tandem duplicate 3 [Source:ZFIN;Acc:ZDB-GENE-061103-511]	ko00600//Sphingolipid metabolism;ko00511//Other glycan degradation	GO:0016020//membrane;GO:0005575//cellular_component	GO:0004308//exo-alpha-sialidase activity;GO:0003674//molecular_function;GO:0016798//hydrolase activity, acting on glycosyl bonds	GO:0001573//ganglioside metabolic process;GO:0006629//lipid metabolic process;GO:0008150//biological_process;GO:0034641//cellular nitrogen compound metabolic process
ENSDARG00000102722	68	309	3.55	15.12	2.09057	1.22781e-13	1.49575e-11	yes	itih3b	-	-	GO:0005575//cellular_component;GO:0005575//cellular_component	-	GO:0008150//biological_process;GO:0008150//biological_process
ENSDARG00000010764	15.5	65	1.195	5.06	2.08213	7.0228e-08	4.18958e-06	yes	flj13639	flj13639 [Source:ZFIN;Acc:ZDB-GENE-030131-8104]	-	-	GO:0016491//oxidoreductase activity;GO:0003674//molecular_function	GO:0008152//metabolic process;GO:0008150//biological_process
ENSDARG00000079393	12.5	54	0.44	1.85	2.07195	2.39041e-07	1.28491e-05	yes	tmprss15	-	-	-	-	-
ENSDARG00000097503	59.5	242.5	10.935	45.655	2.06182	1.50534e-08	1.02198e-06	yes	si:ch73-288o11.5	-	-	-	-	-
ENSDARG00000075931	281	1241	14	57.96	2.04963	2.52379e-25	6.51439e-23	yes	acsl5	acyl-CoA synthetase long-chain family member 5 [Source:ZFIN;Acc:ZDB-GENE-040912-169]	ko01100//Metabolic pathways;ko04146//Peroxisome;ko04920//Adipocytokine signaling pathway;ko03320//PPAR signaling pathway;ko00071//Fatty acid metabolism	GO:0005575//cellular_component;GO:0005575//cellular_component	GO:0003824//catalytic activity;GO:0003674//molecular_function	GO:0008152//metabolic process;GO:0008150//biological_process
ENSDARG00000022951	8	32.5	1.065	4.4	2.04665	2.55322e-05	0.000788653	yes	pth2	parathyroid hormone 2 [Source:ZFIN;Acc:ZDB-GENE-041102-1]	-	GO:0005576//extracellular region;GO:0005575//cellular_component	GO:0048018//receptor agonist activity;GO:0003674//molecular_function	GO:0006171//cAMP biosynthetic process;GO:0007165//signal transduction;GO:0007218//neuropeptide signaling pathway;GO:0007165//signal transduction;GO:0008150//biological_process;GO:0009058//biosynthetic process;GO:0034641//cellular nitrogen compound metabolic process;GO:0044281//small molecule metabolic process
ENSDARG00000038439	1226.5	4921.5	606.43	2504.13	2.0459	7.60984e-18	1.20969e-15	yes	fabp10a	fatty acid binding protein 10a, liver basic [Source:ZFIN;Acc:ZDB-GENE-020318-1]	-	GO:0005575//cellular_component;GO:0005622//intracellular;GO:0005623//cell;GO:0005737//cytoplasm	GO:0003674//molecular_function;GO:0008289//lipid binding;GO:0043167//ion binding	GO:0006810//transport;GO:0008150//biological_process
ENSDARG00000071495	6.5	24	0.86	3.545	2.04338	0.000381296	0.00764057	yes	si:dkey-236e20.3	-	-	-	GO:0017095//heparan sulfate 6-O-sulfotransferase activity;GO:0018723;GO:0018726;GO:0034930//1-hydroxypyrene sulfotransferase activity;GO:0051922;GO:0001517//N-acetylglucosamine 6-O-sulfotransferase activity;GO:0016740//transferase activity;GO:0008146//sulfotransferase activity;GO:0018721;GO:0018724;GO:0018727;GO:0050694//galactose 3-O-sulfotransferase activity;GO:0080131//hydroxyjasmonate sulfotr…	-
ENSDARG00000091783	5.5	22.5	1.13	4.62	2.03157	0.00115108	0.0186622	yes	si:dkeyp-71f10.5	-	-	-	-	-
ENSDARG00000010936	257	1032	10.03	40.89	2.02743	2.45898e-22	5.08774e-20	yes	abcb4	-	-	GO:0016021//integral component of membrane;GO:0005575//cellular_component	GO:0042626//ATPase activity, coupled to transmembrane movement of substances;GO:0000166//nucleotide binding;GO:0005524//ATP binding;GO:0015562//efflux transmembrane transporter activity;GO:0019534//toxin transporter activity;GO:0016887//ATPase activity;GO:0015462//protein-transmembrane transporting ATPase activity;GO:0003674//molecular_function;GO:0008565//protein transporter activity;GO:0022857/…	GO:0055085//transmembrane transport;GO:0009636//response to toxic substance;GO:0006810//transport;GO:0008150//biological_process
ENSDARG00000091609	54	196.5	179.61	729.18	2.02141	2.08819e-09	1.58715e-07	yes	spink4	-	-	-	-	-
ENSDARG00000059054	99.5	425	8.48	34.42	2.02111	2.44223e-19	4.39096e-17	yes	pdk2b	pyruvate dehydrogenase kinase, isozyme 2b [Source:ZFIN;Acc:ZDB-GENE-040426-939]	-	GO:0005575//cellular_component;GO:0005575//cellular_component	GO:0016740//transferase activity;GO:0016301//kinase activity;GO:0003674//molecular_function	GO:0016310//phosphorylation;GO:0008150//biological_process
ENSDARG00000043171	135.5	545	14.865	60.24	2.0188	1.18746e-19	2.19553e-17	yes	CELA1 (3 of 7)	chymotrypsin-like elastase family, member 1 [Source:HGNC Symbol;Acc:HGNC:3308]	-	GO:0005575//cellular_component;GO:0005575//cellular_component	GO:0004252//serine-type endopeptidase activity;GO:0008233//peptidase activity;GO:0016787//hydrolase activity;GO:0008236//serine-type peptidase activity;GO:0003674//molecular_function	GO:0006508//proteolysis;GO:0008150//biological_process
ENSDARG00000103266	136	547.5	8.18	33.07	2.01535	2.06645e-19	3.7673e-17	yes	si:dkey-93h22.6	-	-	-	-	-
ENSDARG00000091136	19	76.5	1.905	7.69	2.01319	1.38045e-07	7.70627e-06	yes	zgc:174259	-	-	GO:0005615//extracellular space;GO:0005575//cellular_component;GO:0005576//extracellular region;GO:0005615//extracellular space	GO:0004867//serine-type endopeptidase inhibitor activity;GO:0003674//molecular_function;GO:0030234//enzyme regulator activity	GO:0010951//negative regulation of endopeptidase activity;GO:0008150//biological_process
ENSDARG00000058678	3.5	14	0.34	1.37	2.01057	0.0025712	0.0344457	yes	aqp10b	-	-	GO:0016020//membrane;GO:0016021//integral component of membrane;GO:0005887//integral component of plasma membrane;GO:0005575//cellular_component;GO:0005623//cell;GO:0005886//plasma membrane	GO:0005372//water transmembrane transporter activity;GO:0015204//urea transmembrane transporter activity;GO:0015254//glycerol channel activity;GO:0005215//transporter activity;GO:0015168//glycerol transmembrane transporter activity;GO:0015250//water channel activity;GO:0003674//molecular_function;GO:0022857//transmembrane transporter activity	GO:0006810//transport;GO:0034220//ion transmembrane transport;GO:0009992//cellular water homeostasis;GO:0006833//water transport;GO:0008150//biological_process;GO:0042592//homeostatic process;GO:0055085//transmembrane transport
ENSDARG00000096843	158	632	19.31	77.56	2.00596	1.07874e-15	1.5284e-13	yes	zgc:193593	zgc:193593 [Source:ZFIN;Acc:ZDB-GENE-080723-21]	-	GO:0005575//cellular_component;GO:0005575//cellular_component	GO:0003674//molecular_function;GO:0003674//molecular_function	GO:0008150//biological_process;GO:0008150//biological_process
ENSDARG00000095360	8.5	34.5	0.475	1.905	2.00379	7.1074e-05	0.0018754	yes	CDH23	-	-	-	-	-
ENSDARG00000104919	11	43.5	0.445	1.78	2	3.92999e-06	0.000155235	yes	si:ch211-153b23.3	-	-	-	-	-
ENSDARG00000035458	1403.5	5840	70.25	280.62	1.99805	3.56099e-25	9.01311e-23	yes	atp2a1l	-	ko04020//Calcium signaling pathway;ko05010//Alzheimer's disease;ko05414//Dilated cardiomyopathy;ko04260//Cardiac muscle contraction;ko05410//Hypertrophic cardiomyopathy (HCM);ko04972//Pancreatic secretion;ko05412//Arrhythmogenic right ventricular cardiomyopathy (ARVC)	GO:0016020//membrane;GO:0033017//sarcoplasmic reticulum membrane;GO:0005783//endoplasmic reticulum;GO:0016021//integral component of membrane;GO:0005575//cellular_component;GO:0005622//intracellular;GO:0005623//cell;GO:0005737//cytoplasm;GO:0043226//organelle	GO:0016787//hydrolase activity;GO:0005388//calcium-transporting ATPase activity;GO:0000166//nucleotide binding;GO:0046872//metal ion binding;GO:0005524//ATP binding;GO:0003674//molecular_function;GO:0043167//ion binding;GO:0016887//ATPase activity;GO:0022857//transmembrane transporter activity	GO:0006810//transport;GO:0006811//ion transport;GO:0006816//calcium ion transport;GO:0070588//calcium ion transmembrane transport;GO:0008150//biological_process;GO:0055085//transmembrane transport
ENSDARG00000044276	30	119	2.95	11.755	1.99449	1.47781e-09	1.13984e-07	yes	spp1	secreted phosphoprotein 1 [Source:ZFIN;Acc:ZDB-GENE-050706-97]	-	GO:0005575//cellular_component;GO:0005575//cellular_component	GO:0003674//molecular_function;GO:0003674//molecular_function	GO:0060348//bone development;GO:0008150//biological_process;GO:0048856//anatomical structure development
ENSDARG00000041108	70.5	267.5	9.47	37.735	1.99447	2.89233e-13	3.42741e-11	yes	ctsh	cathepsin H [Source:ZFIN;Acc:ZDB-GENE-030131-3539]	ko04142//Lysosome	GO:0005575//cellular_component;GO:0005575//cellular_component	GO:0008233//peptidase activity;GO:0016787//hydrolase activity;GO:0008234//cysteine-type peptidase activity;GO:0003674//molecular_function	GO:0006508//proteolysis;GO:0008150//biological_process
ENSDARG00000101861	124.5	495.5	4.725	18.815	1.9935	3.21031e-17	4.9231e-15	yes	cyp2k19	-	-	-	-	-
ENSDARG00000043492	3.5	13.5	0.355	1.41	1.9898	0.0041209	0.0490781	yes	irf1a	interferon regulatory factor 1a [Source:ZFIN;Acc:ZDB-GENE-060421-4031]	-	-	GO:0003700//sequence-specific DNA binding transcription factor activity;GO:0000975//regulatory region DNA binding;GO:0003674//molecular_function;GO:0003677//DNA binding;GO:0001071//nucleic acid binding transcription factor activity	GO:0006355//regulation of transcription, DNA-templated;GO:0008150//biological_process
ENSDARG00000091560	335	1320	20.705	81.875	1.98344	1.17348e-21	2.39006e-19	yes	SLC6A19 (3 of 3)	-	-	-	-	-
ENSDARG00000093316	10	38.5	0.21	0.83	1.98272	5.64241e-05	0.00154514	yes	si:dkey-13i15.1	si:dkey-13i15.1 [Source:ZFIN;Acc:ZDB-GENE-130531-41]	-	GO:0005575//cellular_component;GO:0005623//cell;GO:0005886//plasma membrane	GO:0003674//molecular_function;GO:0043167//ion binding;GO:0004871//signal transducer activity	GO:0007165//signal transduction;GO:0008150//biological_process
ENSDARG00000055185	54	212	4.705	18.53	1.9776	2.17752e-11	2.08706e-09	yes	tm4sf5	transmembrane 4 L six family member 5 [Source:ZFIN;Acc:ZDB-GENE-040718-65]	-	GO:0016021//integral component of membrane;GO:0016020//membrane;GO:0005575//cellular_component	GO:0003674//molecular_function;GO:0003674//molecular_function	GO:0008150//biological_process;GO:0008150//biological_process
ENSDARG00000079059	6.5	24.5	0.62	2.425	1.96764	0.000441422	0.00862659	yes	fam134b	-	-	-	-	-
ENSDARG00000054827	8.5	33	1.06	4.145	1.96731	0.000106598	0.00265426	yes	ssuh2.4	ssu-2 homolog, tandem duplicate 4 [Source:ZFIN;Acc:ZDB-GENE-070424-72]	-	GO:0005575//cellular_component;GO:0005575//cellular_component	-	GO:0008150//biological_process;GO:0008150//biological_process
ENSDARG00000097239	14.5	55	8.99	35.145	1.96693	1.45077e-06	6.4213e-05	yes	si:ch73-31d8.2	-	-	-	-	-
ENSDARG00000023712	282.5	1097.5	8.135	31.765	1.96522	8.51656e-19	1.47038e-16	yes	mao	monoamine oxidase [Source:ZFIN;Acc:ZDB-GENE-040329-3]	ko01100//Metabolic pathways;ko00330//Arginine and proline metabolism;ko00380//Tryptophan metabolism;ko00260//Glycine, serine and threonine metabolism;ko00982//Drug metabolism - cytochrome P450;ko00350//Tyrosine metabolism;ko00340//Histidine metabolism;ko00360//Phenylalanine metabolism	GO:0005575//cellular_component;GO:0005622//intracellular;GO:0005623//cell;GO:0005737//cytoplasm;GO:0005739//mitochondrion;GO:0043226//organelle	GO:0003674//molecular_function;GO:0016491//oxidoreductase activity	GO:0008150//biological_process;GO:0009056//catabolic process;GO:0034641//cellular nitrogen compound metabolic process
ENSDARG00000059305	16	61.5	0.67	2.61	1.96182	4.91608e-06	0.000189309	yes	tmem37	transmembrane protein 37 [Source:ZFIN;Acc:ZDB-GENE-040426-2208]	-	GO:0016020//membrane;GO:0016021//integral component of membrane;GO:0005575//cellular_component	GO:0005244//voltage-gated ion channel activity;GO:0005262//calcium channel activity;GO:0003674//molecular_function;GO:0022857//transmembrane transporter activity	GO:0008150//biological_process;GO:0008150//biological_process
ENSDARG00000093936	24	93	2.065	8.025	1.95836	1.77458e-08	1.19236e-06	yes	si:dkeyp-1h4.6	-	-	-	-	-
ENSDARG00000096304	5.5	25	1.045	4.015	1.9419	4.43745e-05	0.00126293	yes	btr31	bloodthirsty-related gene family, member 31 [Source:ZFIN;Acc:ZDB-GENE-090512-3]	-	-	GO:0003674//molecular_function;GO:0043167//ion binding;GO:0003674//molecular_function;GO:0043167//ion binding	-
ENSDARG00000036767	14	55.5	0.31	1.19	1.94062	4.3181e-05	0.001233	yes	si:dkey-204a24.10	si:dkey-204a24.10 [Source:ZFIN;Acc:ZDB-GENE-120215-160]	-	GO:0005575//cellular_component	GO:0003674//molecular_function;GO:0043167//ion binding	-
ENSDARG00000101726	775	2966.5	35.565	136.33	1.93857	5.18092e-21	1.02323e-18	yes	CES3 (3 of 4)	carboxylesterase 3 [Source:HGNC Symbol;Acc:HGNC:1865]	-	GO:0005615//extracellular space;GO:0005575//cellular_component;GO:0005576//extracellular region;GO:0005615//extracellular space	GO:0052689//carboxylic ester hydrolase activity;GO:0016787//hydrolase activity;GO:0003674//molecular_function	-
ENSDARG00000073876	6	22.5	1.38	5.28	1.93587	0.000607484	0.0110827	yes	si:ch1073-165f9.2	-	-	-	-	-
ENSDARG00000034705	233	851.5	60.14	229.675	1.9332	1.46286e-17	2.2974e-15	yes	pvalb7	parvalbumin 7 [Source:ZFIN;Acc:ZDB-GENE-040718-285]	-	GO:0005575//cellular_component;GO:0005575//cellular_component;GO:0005575//cellular_component;GO:0005575//cellular_component	GO:0003674//molecular_function;GO:0043167//ion binding;GO:0003674//molecular_function;GO:0043167//ion binding;GO:0003674//molecular_function;GO:0043167//ion binding;GO:0003674//molecular_function;GO:0043167//ion binding	-
ENSDARG00000101218	8	30	1.63	6.22	1.93204	0.000327215	0.00674346	yes	si:ch73-345f18.3	-	-	-	-	-
ENSDARG00000037357	7	26.5	0.705	2.69	1.93191	0.000247166	0.00537415	yes	WIPI1 (1 of 2)	-	-	-	-	-
ENSDARG00000099889	141	532.5	4.2	16.005	1.93006	3.67256e-15	5.03914e-13	yes	DUSP27	-	-	-	-	-
ENSDARG00000087258	6	22.5	1.36	5.18	1.92935	0.00194522	0.0281927	yes	ypel2b	-	-	-	-	-
ENSDARG00000069018	209	789.5	14.685	55.735	1.92424	3.93029e-19	6.97026e-17	yes	cyp7a1a	cytochrome P450, family 7, subfamily A, polypeptide 1a [Source:ZFIN;Acc:ZDB-GENE-040426-1296]	ko01100//Metabolic pathways;ko03320//PPAR signaling pathway;ko04976//Bile secretion;ko00140//Steroid hormone biosynthesis;ko00120//Primary bile acid biosynthesis	GO:0005783//endoplasmic reticulum;GO:0005789//endoplasmic reticulum membrane;GO:0016020//membrane;GO:0005575//cellular_component;GO:0005622//intracellular;GO:0005623//cell;GO:0005737//cytoplasm;GO:0043226//organelle	GO:0046872//metal ion binding;GO:0016705//oxidoreductase activity, acting on paired donors, with incorporation or reduction of molecular oxygen;GO:0020037//heme binding;GO:0004497//monooxygenase activity;GO:0005506//iron ion binding;GO:0016491//oxidoreductase activity;GO:0008123//cholesterol 7-alpha-monooxygenase activity;GO:0003674//molecular_function;GO:0043167//ion binding	GO:0055114//oxidation-reduction process;GO:0006699//bile acid biosynthetic process;GO:0071333//cellular response to glucose stimulus;GO:0006707//cholesterol catabolic process;GO:0042632//cholesterol homeostasis;GO:0008150//biological_process;GO:0042592//homeostatic process;GO:0006629//lipid metabolic process;GO:0009056//catabolic process;GO:0044281//small molecule metabolic process;GO:0009058//bi…
ENSDARG00000013524	17	64.5	1.315	4.99	1.92398	7.21956e-06	0.000264345	yes	cyp2ae1	cytochrome P450, family 2, subfamily AE, polypeptide 1 [Source:ZFIN;Acc:ZDB-GENE-090312-107]	-	GO:0005575//cellular_component;GO:0005622//intracellular;GO:0005623//cell;GO:0043226//organelle;GO:0005737//cytoplasm	GO:0003674//molecular_function;GO:0016491//oxidoreductase activity;GO:0043167//ion binding	GO:0008150//biological_process;GO:0009056//catabolic process;GO:0006629//lipid metabolic process;GO:0044281//small molecule metabolic process
ENSDARG00000016918	515.5	1951	23.855	90.47	1.92315	5.57117e-19	9.6827e-17	yes	ace2	-	ko04974//Protein digestion and absorption;ko04614//Renin-angiotensin system	GO:0016020//membrane;GO:0005575//cellular_component	GO:0004180//carboxypeptidase activity;GO:0008237//metallopeptidase activity;GO:0016787//hydrolase activity;GO:0008241//peptidyl-dipeptidase activity;GO:0046872//metal ion binding;GO:0008233//peptidase activity;GO:0003674//molecular_function;GO:0043167//ion binding	GO:0006508//proteolysis;GO:0008150//biological_process
ENSDARG00000010146	5.5	21	0.625	2.37	1.92296	0.00162167	0.0244801	yes	cpa2	carboxypeptidase A2 (pancreatic) [Source:ZFIN;Acc:ZDB-GENE-040801-182]	-	GO:0005575//cellular_component;GO:0005575//cellular_component	GO:0004181//metallocarboxypeptidase activity;GO:0008270//zinc ion binding;GO:0016787//hydrolase activity;GO:0008233//peptidase activity;GO:0004180//carboxypeptidase activity;GO:0003674//molecular_function;GO:0043167//ion binding	GO:0006508//proteolysis;GO:0008150//biological_process
ENSDARG00000012388	52.5	196	12.2	46.06	1.91663	1.10013e-10	9.62426e-09	yes	cox4i1l	-	ko01100//Metabolic pathways;ko05010//Alzheimer's disease;ko05016//Huntington's disease;ko00190//Oxidative phosphorylation;ko05012//Parkinson's disease;ko04260//Cardiac muscle contraction	-	-	-
ENSDARG00000041685	116.5	458	3.715	13.975	1.91141	7.39455e-18	1.18997e-15	yes	A2ML1 (3 of 13)	-	-	GO:0005575//cellular_component;GO:0005576//extracellular region;GO:0005615//extracellular space	GO:0003674//molecular_function;GO:0030234//enzyme regulator activity	-
ENSDARG00000000563	627.5	2149.5	1.23	4.625	1.9108	2.03798e-14	2.63021e-12	yes	ttnb	-	-	-	-	-
ENSDARG00000098278	13	49	0.185	0.695	1.90949	1.98818e-05	0.000637598	yes	FCGBP (2 of 2)	-	-	-	-	-
ENSDARG00000053774	39	146.5	2.16	8.11	1.90867	4.10422e-09	3.02251e-07	yes	alpi.2	-	ko01100//Metabolic pathways;ko00790//Folate biosynthesis	GO:0005575//cellular_component;GO:0005575//cellular_component	GO:0016791//phosphatase activity;GO:0003824//catalytic activity;GO:0003674//molecular_function	GO:0008152//metabolic process;GO:0008150//biological_process
ENSDARG00000101351	5.5	20	0.2	0.745	1.89724	0.00122396	0.019624	yes	si:dkey-16p6.1	-	-	-	-	-
ENSDARG00000011703	92	340.5	2.46	9.16	1.89669	8.60188e-12	8.65834e-10	yes	clocka	clock circadian regulator a [Source:ZFIN;Acc:ZDB-GENE-990630-14]	ko04710//Circadian rhythm - mammal;ko04711//Circadian rhythm - fly	GO:0005737//cytoplasm;GO:0005634//nucleus;GO:0005667//transcription factor complex;GO:0005575//cellular_component;GO:0005622//intracellular;GO:0005623//cell;GO:0043234//protein complex;GO:0043226//organelle;GO:0005737//cytoplasm;GO:0005634//nucleus;GO:0005667//transcription factor complex;GO:0005575//cellular_component;GO:0005622//intracellular;GO:0005623//cell;GO:0043234//protein complex;GO:0043…	GO:0003677//DNA binding;GO:0005515//protein binding;GO:0004871//signal transducer activity;GO:0046982//protein heterodimerization activity;GO:0046983//protein dimerization activity;GO:0003700//sequence-specific DNA binding transcription factor activity;GO:0001071//nucleic acid binding transcription factor activity;GO:0003674//molecular_function;GO:0003677//DNA binding;GO:0003677//DNA binding;GO:0…	GO:0009648//photoperiodism;GO:0045893//positive regulation of transcription, DNA-templated;GO:0007623//circadian rhythm;GO:0009266//response to temperature stimulus;GO:0006355//regulation of transcription, DNA-templated;GO:0007165//signal transduction;GO:0009416//response to light stimulus;GO:0032922//circadian regulation of gene expression;GO:0006351//transcription, DNA-templated;GO:0008150//bio…
ENSDARG00000005713	89	329	9.58	35.595	1.89358	8.59783e-14	1.06736e-11	yes	ethe1	-	-	-	-	-
ENSDARG00000100947	7.5	27.5	0.84	3.11	1.88845	0.00021933	0.00485806	yes	mafk	v-maf avian musculoaponeurotic fibrosarcoma oncogene homolog K [Source:ZFIN;Acc:ZDB-GENE-040624-9]	-	GO:0005634//nucleus;GO:0005667//transcription factor complex;GO:0005575//cellular_component;GO:0005622//intracellular;GO:0005623//cell;GO:0043234//protein complex;GO:0043226//organelle	GO:0046982//protein heterodimerization activity;GO:0003700//sequence-specific DNA binding transcription factor activity;GO:0003677//DNA binding;GO:0000976//transcription regulatory region sequence-specific DNA binding;GO:0043565//sequence-specific DNA binding;GO:0003674//molecular_function;GO:0003677//DNA binding;GO:0001071//nucleic acid binding transcription factor activity	GO:0006351//transcription, DNA-templated;GO:0006355//regulation of transcription, DNA-templated;GO:0045893//positive regulation of transcription, DNA-templated;GO:0008150//biological_process;GO:0009058//biosynthetic process;GO:0034641//cellular nitrogen compound metabolic process
ENSDARG00000030616	33.5	128.5	1.57	5.795	1.88404	1.01568e-08	7.09885e-07	yes	nfe2l1a	-	-	-	-	-
ENSDARG00000079307	6	25.5	1.11	4.095	1.8833	0.000228423	0.0050338	yes	si:dkey-205h13.1	si:dkey-205h13.1 [Source:ZFIN;Acc:ZDB-GENE-090313-227]	-	GO:0016020//membrane;GO:0016021//integral component of membrane;GO:0005575//cellular_component;GO:0016020//membrane;GO:0016021//integral component of membrane;GO:0005575//cellular_component	GO:0016740//transferase activity;GO:0003882//CDP-diacylglycerol-serine O-phosphatidyltransferase activity;GO:0016780//phosphotransferase activity, for other substituted phosphate groups;GO:0003674//molecular_function;GO:0016740//transferase activity;GO:0003882//CDP-diacylglycerol-serine O-phosphatidyltransferase activity;GO:0016780//phosphotransferase activity, for other substituted phosphate gro…	GO:0006659//phosphatidylserine biosynthetic process;GO:0008654//phospholipid biosynthetic process;GO:0006629//lipid metabolic process;GO:0008150//biological_process;GO:0009058//biosynthetic process;GO:0006520//cellular amino acid metabolic process;GO:0044281//small molecule metabolic process;GO:0006659//phosphatidylserine biosynthetic process;GO:0008654//phospholipid biosynthetic process;GO:00066…
ENSDARG00000067859	10.5	33.5	0.085	0.31	1.86673	0.000312634	0.00650469	yes	scospondin	-	-	-	-	-
ENSDARG00000041083	58.5	212.5	2.2	7.99	1.86069	2.77639e-09	2.0859e-07	yes	anpepa	-	-	-	GO:0008237//metallopeptidase activity;GO:0008270//zinc ion binding;GO:0003674//molecular_function;GO:0043167//ion binding;GO:0008233//peptidase activity	GO:0006508//proteolysis;GO:0008150//biological_process
ENSDARG00000062182	9.5	34.5	0.735	2.65	1.85018	0.000306295	0.00639321	yes	slc22a7b.3	solute carrier family 22 (organic anion transporter), member 7b, tandem duplicate 3 [Source:ZFIN;Acc:ZDB-GENE-131120-103]	-	GO:0005575//cellular_component	-	-
ENSDARG00000052633	30.5	88	1.345	4.83	1.84442	1.26082e-05	0.000425771	yes	si:ch211-106n13.3	-	-	-	-	-
ENSDARG00000059370	28.5	104.5	1.05	3.77	1.84418	1.35597e-07	7.60218e-06	yes	nr1d4b	-	-	GO:0005634//nucleus;GO:0005575//cellular_component;GO:0005622//intracellular;GO:0005623//cell;GO:0043226//organelle	GO:0003677//DNA binding;GO:0003700//sequence-specific DNA binding transcription factor activity;GO:0003707//steroid hormone receptor activity;GO:0003708//retinoic acid receptor activity;GO:0043565//sequence-specific DNA binding;GO:0004887//thyroid hormone receptor activity;GO:0008270//zinc ion binding;GO:0046872//metal ion binding;GO:0003674//molecular_function;GO:0043167//ion binding;GO:0001071/…	GO:0006355//regulation of transcription, DNA-templated;GO:0043401//steroid hormone mediated signaling pathway;GO:0006351//transcription, DNA-templated;GO:0048384//retinoic acid receptor signaling pathway;GO:0007165//signal transduction;GO:0008150//biological_process;GO:0009058//biosynthetic process;GO:0034641//cellular nitrogen compound metabolic process
ENSDARG00000095200	8	28	0.28	1.005	1.8437	0.000788304	0.0136825	yes	si:ch211-197e7.1	-	-	-	-	-
ENSDARG00000100311	19.5	70.5	0.605	2.165	1.83936	6.16641e-07	2.97701e-05	yes	si:dkey-165e24.1	-	-	-	-	-
ENSDARG00000027620	6	21.5	0.39	1.395	1.83872	0.000932301	0.0157111	yes	bco2l	beta-carotene 15, 15-dioxygenase 2, like [Source:ZFIN;Acc:ZDB-GENE-010509-1]	-	GO:0005739//mitochondrion;GO:0005575//cellular_component;GO:0005622//intracellular;GO:0005623//cell;GO:0005737//cytoplasm;GO:0005739//mitochondrion;GO:0043226//organelle	GO:0051213//dioxygenase activity;GO:0010437//9,10 (9', 10')-carotenoid-cleaving dioxygenase activity;GO:0016491//oxidoreductase activity;GO:0003674//molecular_function	GO:0055114//oxidation-reduction process;GO:0008150//biological_process
ENSDARG00000092532	14.5	51	2.995	10.7	1.83698	6.01389e-06	0.000226373	yes	si:dkey-21e2.4	-	-	-	-	-
ENSDARG00000074213	5	17.5	0.35	1.25	1.8365	0.00268816	0.0355738	yes	eif3bb	-	-	-	-	-
ENSDARG00000087440	22.5	79	2.755	9.83	1.83514	3.99293e-07	2.03138e-05	yes	ponzr4	plac8 onzin related protein 4 [Source:ZFIN;Acc:ZDB-GENE-050411-6]	-	GO:0005575//cellular_component;GO:0005575//cellular_component	GO:0003674//molecular_function;GO:0003674//molecular_function	-
ENSDARG00000090171	6.5	23	0.35	1.245	1.83072	0.00186879	0.0273858	yes	-	-	-	-	-	-
ENSDARG00000061585	32	113.5	1.795	6.375	1.82844	3.43971e-08	2.20327e-06	yes	cyp4v7	cytochrome P450, family 4, subfamily V, polypeptide 7 [Source:ZFIN;Acc:ZDB-GENE-061103-88]	-	GO:0005575//cellular_component;GO:0005575//cellular_component	GO:0046872//metal ion binding;GO:0016705//oxidoreductase activity, acting on paired donors, with incorporation or reduction of molecular oxygen;GO:0020037//heme binding;GO:0005506//iron ion binding;GO:0016491//oxidoreductase activity;GO:0004497//monooxygenase activity;GO:0003674//molecular_function;GO:0043167//ion binding	GO:0055114//oxidation-reduction process;GO:0008150//biological_process
ENSDARG00000060879	58.5	211	4.105	14.57	1.82755	8.3942e-09	5.96286e-07	yes	slc28a1	-	-	GO:0016021//integral component of membrane;GO:0016020//membrane;GO:0005575//cellular_component	GO:0005415//nucleoside:sodium symporter activity;GO:0001882//nucleoside binding;GO:0003674//molecular_function;GO:0022857//transmembrane transporter activity	GO:0006810//transport;GO:0008150//biological_process
ENSDARG00000103634	59	225.5	7.015	24.73	1.81775	4.4428e-09	3.26264e-07	yes	si:ch73-329n5.6	-	-	-	-	-
ENSDARG00000075159	220.5	770.5	10.64	37.49	1.81701	7.52542e-18	1.2036e-15	yes	mfi2	-	-	GO:0005575//cellular_component;GO:0005576//extracellular region;GO:0005615//extracellular space	GO:0003674//molecular_function;GO:0043167//ion binding	GO:0006810//transport;GO:0008150//biological_process;GO:0042592//homeostatic process
ENSDARG00000045561	6	21	0.975	3.43	1.81473	0.00362614	0.0445504	yes	dram1	DNA-damage regulated autophagy modulator 1 [Source:ZFIN;Acc:ZDB-GENE-041010-147]	-	GO:0005764//lysosome;GO:0005575//cellular_component;GO:0005622//intracellular;GO:0005623//cell;GO:0005737//cytoplasm;GO:0005764//lysosome;GO:0005773//vacuole;GO:0043226//organelle	GO:0003674//molecular_function;GO:0003674//molecular_function	GO:0010506//regulation of autophagy;GO:0042742//defense response to bacterium;GO:0030262//apoptotic nuclear changes;GO:0008150//biological_process;GO:0008219//cell death;GO:0006950//response to stress
ENSDARG00000078389	8.5	29.5	1.265	4.45	1.81467	0.000180489	0.00413838	yes	si:dkey-188i13.7	si:dkey-188i13.7 [Source:ZFIN;Acc:ZDB-GENE-090312-190]	-	GO:0016021//integral component of membrane;GO:0005575//cellular_component	-	-
ENSDARG00000104399	17.5	61	3.425	12.035	1.81306	2.71396e-06	0.000112485	yes	CABZ01064972.2	-	-	-	-	-
ENSDARG00000079802	19.5	68	2	7.02	1.81147	1.48251e-06	6.53961e-05	yes	aanat2	arylalkylamine N-acetyltransferase 2 [Source:ZFIN;Acc:ZDB-GENE-991019-6]	ko01100//Metabolic pathways;ko00380//Tryptophan metabolism	-	GO:0016407//acetyltransferase activity;GO:0016740//transferase activity;GO:0004059//aralkylamine N-acetyltransferase activity;GO:0016746//transferase activity, transferring acyl groups;GO:0008080//N-acetyltransferase activity;GO:0003674//molecular_function	GO:0007623//circadian rhythm;GO:0009648//photoperiodism;GO:0009416//response to light stimulus;GO:0008150//biological_process
ENSDARG00000021677	2.5	12.5	0.345	1.21	1.81034	0.00186687	0.0273731	yes	phf11	-	-	-	GO:0003674//molecular_function;GO:0043167//ion binding	-
ENSDARG00000038153	1857.5	6403.5	725.48	2535.91	1.80549	1.45372e-18	2.46095e-16	yes	lgals2b	-	-	-	-	-
ENSDARG00000026229	61.5	212	11.925	41.675	1.80519	3.45545e-11	3.25211e-09	yes	prnpa	prion protein a [Source:ZFIN;Acc:ZDB-GENE-041217-6]	-	-	GO:0004784//superoxide dismutase activity;GO:0005507//copper ion binding;GO:0003674//molecular_function;GO:0043167//ion binding;GO:0016491//oxidoreductase activity	-
ENSDARG00000055644	67.5	234.5	6.17	21.495	1.80066	4.58989e-10	3.7161e-08	yes	zgc:101788	zgc:101788 [Source:ZFIN;Acc:ZDB-GENE-050320-109]	-	GO:0005575//cellular_component;GO:0005575//cellular_component	GO:0004252//serine-type endopeptidase activity;GO:0005044//scavenger receptor activity;GO:0030247//polysaccharide binding;GO:0003674//molecular_function;GO:0008233//peptidase activity	GO:0006508//proteolysis;GO:0006955//immune response;GO:0002376//immune system process;GO:0008150//biological_process
ENSDARG00000104818	583.5	2019	42.7	148.34	1.7966	5.53767e-19	9.6827e-17	yes	CES3 (4 of 4)	-	-	-	-	-
ENSDARG00000101456	17	58.5	2.05	7.105	1.79321	3.56763e-06	0.000142214	yes	acp5b	acid phosphatase 5b, tartrate resistant [Source:ZFIN;Acc:ZDB-GENE-040718-151]	ko04142//Lysosome;ko04380//Osteoclast differentiation;ko05323//Rheumatoid arthritis;ko00740//Riboflavin metabolism	GO:0005575//cellular_component;GO:0005575//cellular_component	GO:0016787//hydrolase activity;GO:0003993//acid phosphatase activity;GO:0003674//molecular_function;GO:0016791//phosphatase activity	GO:0009612//response to mechanical stimulus;GO:0008150//biological_process
ENSDARG00000091800	23	80	2.325	8.045	1.79086	1.24259e-05	0.000421252	yes	-	-	-	-	-	-
ENSDARG00000098791	41	141	2.44	8.44	1.79036	6.01023e-08	3.64388e-06	yes	CDHR5	-	-	-	-	-
ENSDARG00000039150	1813.5	6151	125.04	431.745	1.78779	9.32313e-19	1.59904e-16	yes	lgmn	-	ko04142//Lysosome;ko04612//Antigen processing and presentation	GO:0005575//cellular_component;GO:0005575//cellular_component	GO:0008233//peptidase activity;GO:0003674//molecular_function	GO:0031103//axon regeneration;GO:0042246//tissue regeneration;GO:0006508//proteolysis;GO:0008150//biological_process;GO:0006950//response to stress;GO:0040007//growth;GO:0048856//anatomical structure development;GO:0030154//cell differentiation
ENSDARG00000101407	16	55.5	0.93	3.2	1.78277	2.2196e-05	0.000703098	yes	tgm1l4	transglutaminase 1 like 4 [Source:ZFIN;Acc:ZDB-GENE-050913-29]	-	GO:0005575//cellular_component;GO:0005575//cellular_component	GO:0003810//protein-glutamine gamma-glutamyltransferase activity;GO:0003674//molecular_function;GO:0016746//transferase activity, transferring acyl groups	GO:0018149//peptide cross-linking;GO:0006464//cellular protein modification process;GO:0008150//biological_process
ENSDARG00000045414	198	681.5	6.66	22.915	1.7827	2.28993e-14	2.94081e-12	yes	elovl2	-	-	-	-	-
ENSDARG00000017882	240.5	822	18.765	64.47	1.78058	2.0173e-17	3.14917e-15	yes	rdh1	retinol dehydrogenase 1 [Source:ZFIN;Acc:ZDB-GENE-030912-15]	-	GO:0005575//cellular_component;GO:0005575//cellular_component	GO:0016491//oxidoreductase activity;GO:0004745//retinol dehydrogenase activity;GO:0003674//molecular_function	GO:0042572//retinol metabolic process;GO:0001501//skeletal system development;GO:0031018//endocrine pancreas development;GO:0035118//embryonic pectoral fin morphogenesis;GO:0031017//exocrine pancreas development;GO:0008152//metabolic process;GO:0042574//retinal metabolic process;GO:0035050//embryonic heart tube development;GO:0030855//epithelial cell differentiation;GO:0008150//biological_process…
ENSDARG00000029230	283.5	968.5	45.405	155.51	1.77608	1.69926e-13	2.05092e-11	yes	pnp4b	-	-	GO:0005737//cytoplasm;GO:0005575//cellular_component;GO:0005622//intracellular;GO:0005623//cell;GO:0005737//cytoplasm	GO:0004731//purine-nucleoside phosphorylase activity;GO:0016740//transferase activity;GO:0016757//transferase activity, transferring glycosyl groups;GO:0003824//catalytic activity;GO:0003674//molecular_function	GO:0043101//purine-containing compound salvage;GO:0009116//nucleoside metabolic process;GO:0006139//nucleobase-containing compound metabolic process;GO:0008150//biological_process;GO:0034641//cellular nitrogen compound metabolic process;GO:0044281//small molecule metabolic process;GO:0009058//biosynthetic process
ENSDARG00000098586	33	111.5	6.33	21.645	1.77376	3.82379e-08	2.40788e-06	yes	zgc:194887	zgc:194887 [Source:ZFIN;Acc:ZDB-GENE-081022-162]	-	GO:0005575//cellular_component;GO:0005575//cellular_component	-	-
ENSDARG00000059700	44.5	152	4.715	16.09	1.77083	5.27435e-07	2.60421e-05	yes	agmat	agmatine ureohydrolase (agmatinase) [Source:ZFIN;Acc:ZDB-GENE-060929-696]	ko01100//Metabolic pathways;ko00330//Arginine and proline metabolism	GO:0005575//cellular_component;GO:0005575//cellular_component	GO:0046872//metal ion binding;GO:0016787//hydrolase activity;GO:0016813//hydrolase activity, acting on carbon-nitrogen (but not peptide) bonds, in linear amidines;GO:0003674//molecular_function;GO:0016810//hydrolase activity, acting on carbon-nitrogen (but not peptide) bonds;GO:0043167//ion binding	-
ENSDARG00000062884	11	37.5	0.535	1.825	1.77029	0.000360706	0.00732367	yes	map3k2	mitogen-activated protein kinase kinase kinase 2 [Source:ZFIN;Acc:ZDB-GENE-120215-96]	ko04010//MAPK signaling pathway;ko04912//GnRH signaling pathway;ko04540//Gap junction	GO:0005575//cellular_component;GO:0005622//intracellular;GO:0005623//cell	GO:0003674//molecular_function;GO:0016301//kinase activity;GO:0043167//ion binding	GO:0006464//cellular protein modification process;GO:0008150//biological_process
ENSDARG00000076483	12.5	42.5	0.65	2.215	1.7688	3.10691e-05	0.000932074	yes	zgc:198241	-	-	-	-	-
ENSDARG00000022183	29.5	99.5	2.925	9.965	1.76843	1.02758e-07	5.91369e-06	yes	gsto1	glutathione S-transferase omega 1 [Source:ZFIN;Acc:ZDB-GENE-040718-365]	ko05200//Pathways in cancer;ko05215//Prostate cancer;ko00480//Glutathione metabolism;ko00980//Metabolism of xenobiotics by cytochrome P450;ko00982//Drug metabolism - cytochrome P450	GO:0005737//cytoplasm;GO:0005575//cellular_component;GO:0005622//intracellular;GO:0005623//cell	GO:0004364//glutathione transferase activity;GO:0003674//molecular_function;GO:0016765//transferase activity, transferring alkyl or aryl (other than methyl) groups	GO:0008152//metabolic process;GO:0008150//biological_process
ENSDARG00000032010	71.5	216.5	4.47	15.22	1.76762	9.57405e-09	6.70956e-07	yes	slc15a2	-	-	GO:0016020//membrane;GO:0016021//integral component of membrane;GO:0005575//cellular_component	GO:0005215//transporter activity;GO:0042936//dipeptide transporter activity;GO:0003674//molecular_function	GO:0006857//oligopeptide transport;GO:0001878//response to yeast;GO:0006810//transport;GO:0008150//biological_process
XLOC_018451	5	17	0.91	3.085	1.76133	0.00334023	0.0419257	yes	TCONS_00045486	-	-	-	-	-
ENSDARG00000100275	62	208.5	6.575	22.27	1.76004	4.83699e-10	3.89198e-08	yes	NMI	-	-	-	-	-
ENSDARG00000075151	5.5	18.5	1.15	3.895	1.75999	0.00356811	0.0441134	yes	si:dkey-188i13.10	si:dkey-188i13.10 [Source:ZFIN;Acc:ZDB-GENE-090313-208]	-	GO:0016021//integral component of membrane;GO:0005575//cellular_component	-	-
ENSDARG00000092916	6	19.5	2.005	6.785	1.75875	0.00210043	0.0297923	yes	mlnl	-	-	-	-	-
XLOC_006667	47.5	159	6.225	20.975	1.75253	3.04422e-09	2.26105e-07	yes	TCONS_00016775	PREDICTED: von Willebrand factor A domain-containing protein 7 [Danio rerio]	-	-	-	-
ENSDARG00000063059	21	68.5	1.405	4.725	1.74974	7.62963e-06	0.000276547	yes	abcg8	-	ko04976//Bile secretion;ko04975//Fat digestion and absorption;ko02010//ABC transporters	GO:0016020//membrane;GO:0005575//cellular_component	GO:0000166//nucleotide binding;GO:0005524//ATP binding;GO:0016887//ATPase activity;GO:0003674//molecular_function;GO:0043167//ion binding	-
XLOC_006072	46.5	155	1.295	4.335	1.74308	3.89179e-08	2.44479e-06	yes	TCONS_00015253	PREDICTED: probable G-protein coupled receptor 112-like [Danio rerio]	-	-	-	-
ENSDARG00000003615	129.5	432	7.01	23.43	1.74087	6.507e-13	7.28058e-11	yes	slc26a3.2	solute carrier family 26 (anion exchanger), member 3, tandem duplicate 2 [Source:ZFIN;Acc:ZDB-GENE-041210-179]	-	GO:0016020//membrane;GO:0016021//integral component of membrane;GO:0005887//integral component of plasma membrane;GO:0005575//cellular_component;GO:0005623//cell;GO:0005886//plasma membrane	GO:0008271//secondary active sulfate transmembrane transporter activity;GO:0015116//sulfate transmembrane transporter activity;GO:0015301//anion:anion antiporter activity;GO:0003674//molecular_function;GO:0022857//transmembrane transporter activity	GO:0006821//chloride transport;GO:0008272//sulfate transport;GO:0015701//bicarbonate transport;GO:0055085//transmembrane transport;GO:0006810//transport;GO:0008150//biological_process
ENSDARG00000042829	62.5	203	0.25	0.83	1.73118	9.31159e-07	4.33488e-05	yes	si:dkey-30j22.1	si:dkey-30j22.1 [Source:ZFIN;Acc:ZDB-GENE-041001-184]	-	-	GO:0003674//molecular_function;GO:0005198//structural molecule activity;GO:0043167//ion binding	-
ENSDARG00000055752	8	25.5	0.21	0.69	1.71621	0.0015863	0.0240715	yes	npas4a	neuronal PAS domain protein 4a [Source:ZFIN;Acc:ZDB-GENE-060616-396]	-	GO:0005575//cellular_component;GO:0005622//intracellular;GO:0005623//cell;GO:0005634//nucleus;GO:0043226//organelle	GO:0003674//molecular_function;GO:0003677//DNA binding;GO:0004871//signal transducer activity	GO:0008150//biological_process;GO:0048856//anatomical structure development;GO:0009058//biosynthetic process;GO:0034641//cellular nitrogen compound metabolic process
ENSDARG00000062788	40.5	119.5	2.935	9.635	1.71492	2.35465e-06	9.88498e-05	yes	irg1l	-	-	GO:0005739//mitochondrion;GO:0005575//cellular_component;GO:0005622//intracellular;GO:0005623//cell;GO:0005737//cytoplasm;GO:0005739//mitochondrion;GO:0043226//organelle	GO:0047547//2-methylcitrate dehydratase activity;GO:0047613//aconitate decarboxylase activity;GO:0003674//molecular_function;GO:0016829//lyase activity	GO:0019543//propionate catabolic process;GO:0006952//defense response;GO:0006950//response to stress;GO:0008150//biological_process;GO:0006629//lipid metabolic process;GO:0009056//catabolic process;GO:0044281//small molecule metabolic process
ENSDARG00000028354	11.5	37	0.57	1.87	1.714	0.000173963	0.00401045	yes	stxbp6l	-	-	GO:0005886//plasma membrane;GO:0000145//exocyst;GO:0016021//integral component of membrane;GO:0005575//cellular_component;GO:0005622//intracellular;GO:0005623//cell;GO:0005737//cytoplasm;GO:0043234//protein complex;GO:0005886//plasma membrane	GO:0005546//phosphatidylinositol-4,5-bisphosphate binding;GO:0017049//GTP-Rho binding;GO:0003674//molecular_function;GO:0019899//enzyme binding;GO:0008289//lipid binding;GO:0043167//ion binding	GO:0006887//exocytosis;GO:0051601//exocyst localization;GO:0006893//Golgi to plasma membrane transport;GO:0016192//vesicle-mediated transport;GO:0006810//transport;GO:0008150//biological_process
ENSDARG00000019260	134.5	438	15.03	49.265	1.71272	3.40041e-13	3.93994e-11	yes	dhrs9	dehydrogenase/reductase (SDR family) member 9 [Source:ZFIN;Acc:ZDB-GENE-030131-1249]	-	-	GO:0016491//oxidoreductase activity;GO:0004745//retinol dehydrogenase activity;GO:0003674//molecular_function	GO:0042572//retinol metabolic process;GO:0031017//exocrine pancreas development;GO:0060047//heart contraction;GO:0048703//embryonic viscerocranium morphogenesis;GO:0001947//heart looping;GO:0014032//neural crest cell development;GO:0008152//metabolic process;GO:0035138//pectoral fin morphogenesis;GO:0042574//retinal metabolic process;GO:0048546//digestive tract morphogenesis;GO:0008150//biologica…
ENSDARG00000071626	262.5	861.5	39.81	130.48	1.71263	1.07478e-15	1.5284e-13	yes	zgc:153154	-	ko01100//Metabolic pathways;ko00590//Arachidonic acid metabolism	GO:0005576//extracellular region;GO:0005575//cellular_component	GO:0005215//transporter activity;GO:0036094//small molecule binding;GO:0003674//molecular_function	GO:0006629//lipid metabolic process;GO:0006810//transport;GO:0008150//biological_process
ENSDARG00000097938	6	19.5	1.155	3.785	1.7124	0.00320026	0.0407813	yes	ASB5 (2 of 2)	ankyrin repeat and SOCS box containing 5 [Source:HGNC Symbol;Acc:HGNC:17180]	-	-	GO:0003674//molecular_function;GO:0003674//molecular_function	GO:0016567//protein ubiquitination;GO:0035556//intracellular signal transduction;GO:0007165//signal transduction;GO:0008150//biological_process;GO:0006464//cellular protein modification process
ENSDARG00000104890	16	47	1.21	3.965	1.71231	0.000107262	0.00266494	yes	si:ch211-76m11.3	-	-	-	-	-
ENSDARG00000023768	28	90.5	1.695	5.55	1.7112	2.07531e-06	8.85489e-05	yes	mfsd4a	-	-	-	-	-
ENSDARG00000016494	71	219.5	2.595	8.495	1.71088	2.93271e-07	1.55083e-05	yes	ddc	dopa decarboxylase [Source:ZFIN;Acc:ZDB-GENE-040426-2656]	ko01100//Metabolic pathways;ko00380//Tryptophan metabolism;ko00350//Tyrosine metabolism;ko00340//Histidine metabolism;ko00360//Phenylalanine metabolism	GO:0005575//cellular_component;GO:0005575//cellular_component	GO:0016829//lyase activity;GO:0016831//carboxy-lyase activity;GO:0030170//pyridoxal phosphate binding;GO:0003824//catalytic activity;GO:0003674//molecular_function;GO:0043167//ion binding	GO:0007420//brain development;GO:0019752//carboxylic acid metabolic process;GO:0006520//cellular amino acid metabolic process;GO:0008150//biological_process;GO:0044281//small molecule metabolic process;GO:0048856//anatomical structure development
ENSDARG00000076294	32	107.5	1.49	4.87	1.70861	4.32959e-07	2.18322e-05	yes	klb	-	-	-	-	-
ENSDARG00000031757	20.5	64.5	1.035	3.38	1.70739	0.000163159	0.00381827	yes	tmc4	-	-	GO:0005575//cellular_component	-	-
ENSDARG00000103878	464	1517	18.635	60.795	1.70594	9.44631e-14	1.16163e-11	yes	anpepb	alanyl (membrane) aminopeptidase b [Source:ZFIN;Acc:ZDB-GENE-030131-1253]	ko01100//Metabolic pathways;ko04640//Hematopoietic cell lineage;ko00480//Glutathione metabolism;ko04614//Renin-angiotensin system	-	GO:0008237//metallopeptidase activity;GO:0008270//zinc ion binding;GO:0003674//molecular_function;GO:0043167//ion binding;GO:0008233//peptidase activity	GO:0006508//proteolysis;GO:0008150//biological_process
ENSDARG00000032639	282.5	915.5	21.175	68.805	1.70015	5.40954e-15	7.30708e-13	yes	cd36	CD36 molecule (thrombospondin receptor) [Source:ZFIN;Acc:ZDB-GENE-040718-55]	ko04145//Phagosome;ko04920//Adipocytokine signaling pathway;ko03320//PPAR signaling pathway;ko04512//ECM-receptor interaction;ko04640//Hematopoietic cell lineage;ko04975//Fat digestion and absorption;ko05144//Malaria	GO:0016020//membrane;GO:0016021//integral component of membrane;GO:0005575//cellular_component	-	GO:0033552//response to vitamin B3;GO:0006955//immune response;GO:0007155//cell adhesion;GO:0034694//response to prostaglandin;GO:0008150//biological_process;GO:0002376//immune system process
ENSDARG00000038025	55	177	3.67	11.925	1.70014	9.21023e-09	6.48948e-07	yes	cbx7a	chromobox homolog 7a [Source:ZFIN;Acc:ZDB-GENE-050417-400]	-	GO:0005634//nucleus;GO:0005575//cellular_component;GO:0005622//intracellular;GO:0005623//cell;GO:0043226//organelle	-	-
ENSDARG00000088044	8	26	0.545	1.77	1.69942	0.000879642	0.01495	yes	TSPAN19	-	-	-	-	-
ENSDARG00000105061	25	80	2.235	7.25	1.69771	2.43386e-05	0.00075989	yes	si:ch73-261i21.5	-	-	-	-	-
ENSDARG00000011581	19.5	58.5	0.555	1.8	1.69744	0.000123973	0.00301332	yes	si:dkey-23k10.5	-	-	-	-	-
ENSDARG00000057408	37.5	120	4.53	14.68	1.69627	1.35274e-07	7.60042e-06	yes	CABZ01067232.1	-	-	-	-	-
ENSDARG00000076900	12.5	40.5	1.205	3.9	1.69444	0.00124626	0.0199203	yes	PROZ (2 of 2)	protein Z, vitamin K-dependent plasma glycoprotein [Source:HGNC Symbol;Acc:HGNC:9460]	-	-	GO:0003674//molecular_function;GO:0043167//ion binding;GO:0008233//peptidase activity	GO:0006950//response to stress;GO:0008150//biological_process
ENSDARG00000090228	2141.5	7100.5	477.655	1545.12	1.69368	2.02591e-18	3.36404e-16	yes	gstal	glutathione S-transferase, alpha-like [Source:ZFIN;Acc:ZDB-GENE-040426-2720]	ko05200//Pathways in cancer;ko05215//Prostate cancer;ko00480//Glutathione metabolism;ko00980//Metabolism of xenobiotics by cytochrome P450;ko00982//Drug metabolism - cytochrome P450	-	GO:0016740//transferase activity;GO:0004364//glutathione transferase activity;GO:0003674//molecular_function;GO:0016765//transferase activity, transferring alkyl or aryl (other than methyl) groups;GO:0016740//transferase activity;GO:0004364//glutathione transferase activity;GO:0003674//molecular_function;GO:0016765//transferase activity, transferring alkyl or aryl (other than methyl) groups	GO:0008152//metabolic process;GO:0008150//biological_process;GO:0008152//metabolic process;GO:0008150//biological_process
ENSDARG00000007080	23	73	1.605	5.19	1.69316	1.04167e-05	0.000360643	yes	rhcgl1	Rh family, C glycoprotein, like 1 [Source:ZFIN;Acc:ZDB-GENE-060209-2]	-	GO:0005575//cellular_component;GO:0005575//cellular_component	GO:0003674//molecular_function;GO:0022857//transmembrane transporter activity;GO:0003674//molecular_function;GO:0022857//transmembrane transporter activity	GO:0006810//transport;GO:0008150//biological_process;GO:0006810//transport;GO:0008150//biological_process
ENSDARG00000036628	5	17	0.86	2.775	1.69008	0.0028497	0.0372576	yes	cd74b	-	-	GO:0016020//membrane;GO:0005575//cellular_component	GO:0042289//MHC class II protein binding;GO:0003674//molecular_function	GO:0048839//inner ear development;GO:0006886//intracellular protein transport;GO:0048884//neuromast development;GO:0019882//antigen processing and presentation;GO:0006955//immune response;GO:0002376//immune system process;GO:0008150//biological_process;GO:0048856//anatomical structure development;GO:0006810//transport
ENSDARG00000038009	11	35	0.94	3.03	1.68859	0.000320159	0.00661375	yes	-	-	-	-	-	-
ENSDARG00000076230	18.5	54.5	0.31	0.995	1.68243	4.17511e-05	0.00120049	yes	atp10b	-	-	-	-	-
ENSDARG00000101473	16.5	52.5	3.12	10.01	1.68182	4.92993e-05	0.00137753	yes	si:ch211-25g7.5	-	-	-	-	-
ENSDARG00000079647	163.5	521.5	10.145	32.53	1.681	6.55656e-14	8.29754e-12	yes	muc13b	-	-	GO:0005575//cellular_component;GO:0005575//cellular_component	GO:0003674//molecular_function;GO:0003674//molecular_function	GO:0007507//heart development;GO:0007043//cell-cell junction assembly;GO:0008150//biological_process;GO:0022607//cellular component assembly;GO:0034330;GO:0048856//anatomical structure development
ENSDARG00000079703	8	25.5	0.765	2.45	1.67925	0.00315034	0.0403089	yes	si:dkey-18p12.4	-	-	-	-	-
ENSDARG00000105151	14	44.5	1.33	4.25	1.67604	5.48778e-05	0.00150596	yes	cyp2k21	cytochrome P450, family 2, subfamily k, polypeptide 21 [Source:ZFIN;Acc:ZDB-GENE-091113-17]	-	GO:0043231//intracellular membrane-bounded organelle;GO:0005737//cytoplasm;GO:0005575//cellular_component;GO:0005622//intracellular;GO:0005623//cell;GO:0005737//cytoplasm;GO:0043226//organelle;GO:0043231//intracellular membrane-bounded organelle;GO:0005737//cytoplasm;GO:0005575//cellular_component;GO:0005622//intracellular;GO:0005623//cell;GO:0005737//cytoplasm;GO:0043226//organelle;GO:0043231//i…	GO:0046872//metal ion binding;GO:0019825//oxygen binding;GO:0016712//oxidoreductase activity, acting on paired donors, with incorporation or reduction of molecular oxygen, reduced flavin or flavoprotein as one donor, and incorporation of one atom of oxygen;GO:0020037//heme binding;GO:0016705//oxidoreductase activity, acting on paired donors, with incorporation or reduction of molecular oxygen;GO:…	GO:0055114//oxidation-reduction process;GO:0042738//exogenous drug catabolic process;GO:0006805//xenobiotic metabolic process;GO:0006082//organic acid metabolic process;GO:0008150//biological_process;GO:0044281//small molecule metabolic process;GO:0009056//catabolic process;GO:0055114//oxidation-reduction process;GO:0042738//exogenous drug catabolic process;GO:0006805//xenobiotic metabolic proces…
ENSDARG00000093365	27.5	87	1.05	3.35	1.67377	3.83702e-05	0.00111892	yes	si:ch211-226h7.3	-	-	-	-	-
ENSDARG00000009702	12	38	0.475	1.515	1.67332	0.000407669	0.00808822	yes	ascl1b	-	-	-	-	-
ENSDARG00000098398	12	37.5	0.56	1.785	1.67243	0.000302857	0.00635563	yes	CABZ01079480.1	-	-	-	-	-
ENSDARG00000098925	8.5	25.5	8.21	26.15	1.67136	0.00246672	0.0335565	yes	prdm1b	-	-	-	-	-
ENSDARG00000079901	9	32	1.165	3.695	1.66524	0.000430306	0.00844735	yes	si:ch73-15n24.1	-	-	-	-	-
ENSDARG00000099111	105	331.5	5.105	16.145	1.6611	2.94723e-11	2.79398e-09	yes	zgc:175280	zgc:175280 [Source:ZFIN;Acc:ZDB-GENE-080219-39]	-	GO:0016020//membrane;GO:0016021//integral component of membrane;GO:0005887//integral component of plasma membrane;GO:0005575//cellular_component;GO:0005623//cell;GO:0005886//plasma membrane	GO:0015181//arginine transmembrane transporter activity;GO:0015297//antiporter activity;GO:0015189//L-lysine transmembrane transporter activity;GO:0000064//L-ornithine transmembrane transporter activity;GO:0015171//amino acid transmembrane transporter activity;GO:0003674//molecular_function;GO:0022857//transmembrane transporter activity	GO:0003333//amino acid transmembrane transport;GO:0006865//amino acid transport;GO:0006810//transport;GO:0008150//biological_process;GO:0055085//transmembrane transport
ENSDARG00000102249	240	750.5	18.815	59.235	1.65457	1.73095e-15	2.40032e-13	yes	PEPD	-	-	-	-	-
ENSDARG00000068181	68.5	214	5.835	18.325	1.65101	1.91646e-09	1.46644e-07	yes	dpep1	dipeptidase 1 (renal) [Source:ZFIN;Acc:ZDB-GENE-061013-388]	-	GO:0016020//membrane;GO:0031225//anchored component of membrane;GO:0005575//cellular_component	GO:0016787//hydrolase activity;GO:0046872//metal ion binding;GO:0008237//metallopeptidase activity;GO:0016805//dipeptidase activity;GO:0008235//metalloexopeptidase activity;GO:0008239//dipeptidyl-peptidase activity;GO:0008233//peptidase activity;GO:0003674//molecular_function;GO:0043167//ion binding	GO:0006508//proteolysis;GO:0008150//biological_process
ENSDARG00000088432	31.5	98.5	0.395	1.24	1.65042	2.7776e-05	0.000848909	yes	si:dkey-162h11.3	-	-	-	-	-
ENSDARG00000035553	12	37	1.27	3.985	1.64975	0.00016675	0.00388273	yes	cx27.5	connexin 27.5 [Source:ZFIN;Acc:ZDB-GENE-010619-2]	-	GO:0005886//plasma membrane;GO:0016021//integral component of membrane;GO:0005921//gap junction;GO:0005922//connexon complex;GO:0030054//cell junction;GO:0016020//membrane;GO:0005575//cellular_component;GO:0005623//cell;GO:0043234//protein complex;GO:0005886//plasma membrane;GO:0016021//integral component of membrane;GO:0005921//gap junction;GO:0005922//connexon complex;GO:0030054//cell junction;…	-	GO:0007154//cell communication;GO:0008150//biological_process;GO:0007154//cell communication;GO:0008150//biological_process;GO:0007154//cell communication;GO:0008150//biological_process
XLOC_013238	13.5	41	8.02	25.12	1.64716	0.000185835	0.0042386	yes	TCONS_00032735	PREDICTED: mucin-17 [Danio rerio]	-	-	-	-
ENSDARG00000062156	11.5	30.5	1	3.125	1.64386	0.00191557	0.0278988	yes	abi3bpa	-	-	-	-	-
ENSDARG00000088013	14	44	1.205	3.75	1.63786	0.000189701	0.00430794	yes	CYP27A1 (4 of 4)	-	-	GO:0005575//cellular_component;GO:0005575//cellular_component	GO:0016491//oxidoreductase activity;GO:0004497//monooxygenase activity;GO:0016705//oxidoreductase activity, acting on paired donors, with incorporation or reduction of molecular oxygen;GO:0020037//heme binding;GO:0046872//metal ion binding;GO:0005506//iron ion binding;GO:0003674//molecular_function;GO:0043167//ion binding	GO:0055114//oxidation-reduction process;GO:0008150//biological_process
ENSDARG00000061011	25	77	3.94	12.25	1.63651	6.56101e-06	0.000242618	yes	hlfb	hepatic leukemia factor b [Source:ZFIN;Acc:ZDB-GENE-110420-3]	-	GO:0005634//nucleus;GO:0005575//cellular_component;GO:0005622//intracellular;GO:0005623//cell;GO:0043226//organelle	GO:0003677//DNA binding;GO:0003700//sequence-specific DNA binding transcription factor activity;GO:0043565//sequence-specific DNA binding;GO:0003674//molecular_function;GO:0001071//nucleic acid binding transcription factor activity	GO:0006355//regulation of transcription, DNA-templated;GO:0008150//biological_process
ENSDARG00000103187	8	26.5	0.48	1.49	1.63421	0.000576082	0.0106213	yes	syce2	synaptonemal complex central element protein 2 [Source:ZFIN;Acc:ZDB-GENE-050512-1]	-	GO:0005575//cellular_component;GO:0005575//cellular_component;GO:0005575//cellular_component;GO:0005575//cellular_component	-	-
ENSDARG00000028027	182.5	559	17.595	54.58	1.63321	3.07903e-13	3.59956e-11	yes	trim63a	tripartite motif containing 63a [Source:ZFIN;Acc:ZDB-GENE-040625-139]	-	GO:0005622//intracellular;GO:0005575//cellular_component;GO:0005623//cell	GO:0046872//metal ion binding;GO:0008270//zinc ion binding;GO:0003674//molecular_function;GO:0043167//ion binding	-
ENSDARG00000036588	120.5	371.5	10.72	33.245	1.63283	4.42302e-12	4.57572e-10	yes	mhc1zba	major histocompatibility complex class I ZBA [Source:ZFIN;Acc:ZDB-GENE-040426-2149]	-	GO:0016021//integral component of membrane;GO:0016020//membrane;GO:0042612//MHC class I protein complex;GO:0005575//cellular_component;GO:0005623//cell;GO:0005886//plasma membrane;GO:0043234//protein complex;GO:0005886//plasma membrane;GO:0016021//integral component of membrane;GO:0016020//membrane;GO:0042612//MHC class I protein complex;GO:0005575//cellular_component;GO:0005623//cell;GO:0005886/…	GO:0042605//peptide antigen binding;GO:0003674//molecular_function;GO:0003823//antigen binding;GO:0042605//peptide antigen binding;GO:0003674//molecular_function;GO:0003823//antigen binding	GO:0002474//antigen processing and presentation of peptide antigen via MHC class I;GO:0006955//immune response;GO:0019882//antigen processing and presentation;GO:0019882//antigen processing and presentation;GO:0002376//immune system process;GO:0008150//biological_process;GO:0002474//antigen processing and presentation of peptide antigen via MHC class I;GO:0006955//immune response;GO:0019882//anti…
ENSDARG00000058462	1705.5	5257	124.905	386.725	1.63048	4.26555e-17	6.46528e-15	yes	zgc:158846	zgc:158846 [Source:ZFIN;Acc:ZDB-GENE-070209-50]	-	GO:0005882//intermediate filament;GO:0045095//keratin filament;GO:0005575//cellular_component;GO:0005622//intracellular;GO:0005623//cell;GO:0005856//cytoskeleton;GO:0043226//organelle;GO:0043234//protein complex	GO:0005198//structural molecule activity;GO:0003674//molecular_function	GO:0008150//biological_process;GO:0008150//biological_process
ENSDARG00000090903	24.5	75.5	1.84	5.675	1.62491	0.000135122	0.00326169	yes	CREB3L3 (2 of 2)	-	-	-	-	-
XLOC_010962	44	133.5	1.565	4.815	1.62137	2.84158e-06	0.000116845	yes	TCONS_00027188	PREDICTED: fibrillin-1-like [Maylandia zebra]	-	-	-	-
ENSDARG00000053761	13	40	0.855	2.63	1.62107	0.000312574	0.00650469	yes	si:dkey-187j14.4	si:dkey-187j14.4 [Source:ZFIN;Acc:ZDB-GENE-131119-26]	-	-	GO:0003674//molecular_function;GO:0043167//ion binding	-
ENSDARG00000032816	64	185	6.825	20.99	1.6208	2.58941e-08	1.69613e-06	yes	tm7sf2	transmembrane 7 superfamily member 2 [Source:ZFIN;Acc:ZDB-GENE-041212-19]	ko01100//Metabolic pathways;ko00100//Steroid biosynthesis	GO:0016020//membrane;GO:0005575//cellular_component	GO:0016628//oxidoreductase activity, acting on the CH-CH group of donors, NAD or NADP as acceptor;GO:0003674//molecular_function;GO:0016491//oxidoreductase activity	GO:0055114//oxidation-reduction process;GO:0008150//biological_process
ENSDARG00000103639	258	785	47.655	146.51	1.6203	1.04583e-14	1.39106e-12	yes	si:dkey-36i7.3	si:dkey-36i7.3 [Source:ZFIN;Acc:ZDB-GENE-131127-316]	-	GO:0016020//membrane;GO:0005575//cellular_component	GO:0005216//ion channel activity;GO:0003674//molecular_function;GO:0022857//transmembrane transporter activity	GO:0006811//ion transport;GO:0006810//transport;GO:0008150//biological_process
ENSDARG00000042982	61	186.5	4.61	14.125	1.61541	2.8326e-08	1.83696e-06	yes	cyp2p8	cytochrome P450, family 2, subfamily P, polypeptide 8 [Source:ZFIN;Acc:ZDB-GENE-061030-1]	ko01100//Metabolic pathways;ko00590//Arachidonic acid metabolism;ko00591//Linoleic acid metabolism	GO:0005737//cytoplasm;GO:0043231//intracellular membrane-bounded organelle;GO:0005575//cellular_component;GO:0005622//intracellular;GO:0005623//cell;GO:0043226//organelle;GO:0005737//cytoplasm	GO:0019825//oxygen binding;GO:0016712//oxidoreductase activity, acting on paired donors, with incorporation or reduction of molecular oxygen, reduced flavin or flavoprotein as one donor, and incorporation of one atom of oxygen;GO:0016705//oxidoreductase activity, acting on paired donors, with incorporation or reduction of molecular oxygen;GO:0020037//heme binding;GO:0005506//iron ion binding;GO:0…	GO:0055114//oxidation-reduction process;GO:0042738//exogenous drug catabolic process;GO:0019369//arachidonic acid metabolic process;GO:0006805//xenobiotic metabolic process;GO:0008150//biological_process;GO:0006629//lipid metabolic process;GO:0044281//small molecule metabolic process;GO:0009056//catabolic process
ENSDARG00000089534	21	63	8.725	26.69	1.61307	3.05049e-05	0.000917259	yes	CU693369.1	-	-	-	-	-
ENSDARG00000093043	20.5	62.5	2.005	6.125	1.61111	1.89873e-05	0.000613383	yes	FP236810.1	-	-	-	-	-
ENSDARG00000014320	92.5	287	4.295	13.12	1.61104	2.1637e-10	1.81375e-08	yes	gucy2c	-	-	-	-	-
ENSDARG00000039269	90	272.5	5.42	16.545	1.61003	4.69399e-09	3.4278e-07	yes	arg2	arginase 2 [Source:ZFIN;Acc:ZDB-GENE-030131-1334]	ko01100//Metabolic pathways;ko05146//Amoebiasis;ko00330//Arginine and proline metabolism	-	GO:0046872//metal ion binding;GO:0004053//arginase activity;GO:0016787//hydrolase activity;GO:0016813//hydrolase activity, acting on carbon-nitrogen (but not peptide) bonds, in linear amidines;GO:0003674//molecular_function;GO:0016810//hydrolase activity, acting on carbon-nitrogen (but not peptide) bonds;GO:0043167//ion binding	GO:0000050//urea cycle;GO:0006525//arginine metabolic process;GO:0006520//cellular amino acid metabolic process;GO:0008150//biological_process;GO:0044281//small molecule metabolic process;GO:0009058//biosynthetic process;GO:0034641//cellular nitrogen compound metabolic process;GO:0071941
ENSDARG00000030478	170	505.5	11.135	33.83	1.6032	1.63393e-11	1.58942e-09	yes	zgc:66484	-	-	-	-	-
ENSDARG00000028213	1152.5	3446	2.02	6.115	1.598	1.12928e-08	7.82988e-07	yes	ttna	-	-	-	-	-
ENSDARG00000030157	40.5	115	1.52	4.58	1.59128	8.89805e-06	0.00031518	yes	mybpc2a	myosin binding protein C, fast type a [Source:ZFIN;Acc:ZDB-GENE-060901-1]	-	GO:0005575//cellular_component;GO:0005575//cellular_component	GO:0003674//molecular_function;GO:0003674//molecular_function	GO:0008150//biological_process;GO:0008150//biological_process
ENSDARG00000101142	22.5	66.5	0.175	0.525	1.58496	0.00136719	0.0214974	yes	si:ch211-182a13.1	-	-	-	-	-
ENSDARG00000043997	22	65.5	2.185	6.525	1.57834	1.41332e-05	0.000470564	yes	cyp2x8	-	-	GO:0005737//cytoplasm;GO:0043231//intracellular membrane-bounded organelle;GO:0005575//cellular_component;GO:0005622//intracellular;GO:0005623//cell;GO:0043226//organelle;GO:0005737//cytoplasm	GO:0046872//metal ion binding;GO:0016712//oxidoreductase activity, acting on paired donors, with incorporation or reduction of molecular oxygen, reduced flavin or flavoprotein as one donor, and incorporation of one atom of oxygen;GO:0008395//steroid hydroxylase activity;GO:0020037//heme binding;GO:0016705//oxidoreductase activity, acting on paired donors, with incorporation or reduction of molecu…	GO:0006082//organic acid metabolic process;GO:0006805//xenobiotic metabolic process;GO:0055114//oxidation-reduction process;GO:0042738//exogenous drug catabolic process;GO:0008150//biological_process;GO:0009056//catabolic process;GO:0044281//small molecule metabolic process
ENSDARG00000039423	60	178	3.22	9.615	1.57823	1.48262e-07	8.24136e-06	yes	-	-	-	-	-	-
ENSDARG00000089192	6.5	19.5	0.49	1.46	1.57511	0.00392648	0.0473423	yes	SLC7A13	-	-	-	-	-
ENSDARG00000004748	457.5	1317.5	19.615	58.25	1.5703	7.18323e-14	9.0467e-12	yes	zgc:100868	zgc:100868 [Source:ZFIN;Acc:ZDB-GENE-040801-33]	-	GO:0005575//cellular_component;GO:0005575//cellular_component	GO:0016787//hydrolase activity;GO:0008236//serine-type peptidase activity;GO:0004252//serine-type endopeptidase activity;GO:0008233//peptidase activity;GO:0003674//molecular_function	GO:0006508//proteolysis;GO:0008150//biological_process
ENSDARG00000055313	11	32.5	0.465	1.38	1.56937	0.00145664	0.0226096	yes	slc12a10.1	-	-	GO:0016020//membrane;GO:0016021//integral component of membrane;GO:0005575//cellular_component;GO:0016020//membrane;GO:0016021//integral component of membrane;GO:0005575//cellular_component	GO:0005215//transporter activity;GO:0015377//cation:chloride symporter activity;GO:0003674//molecular_function;GO:0022857//transmembrane transporter activity;GO:0005215//transporter activity;GO:0015377//cation:chloride symporter activity;GO:0003674//molecular_function;GO:0022857//transmembrane transporter activity	GO:0006811//ion transport;GO:0006810//transport;GO:0055085//transmembrane transport;GO:0008150//biological_process;GO:0006811//ion transport;GO:0006810//transport;GO:0055085//transmembrane transport;GO:0008150//biological_process
ENSDARG00000052122	21.5	63	0.705	2.08	1.56089	9.91638e-05	0.00249056	yes	rag1	-	ko05340//Primary immunodeficiency	-	-	-
ENSDARG00000102435	104.5	305.5	13.25	39.075	1.56025	1.34077e-10	1.16513e-08	yes	plekhf1	pleckstrin homology domain containing, family F (with FYVE domain) member 1 [Source:ZFIN;Acc:ZDB-GENE-040426-1289]	-	-	GO:0046872//metal ion binding;GO:0003674//molecular_function;GO:0043167//ion binding	-
ENSDARG00000094719	92.5	269	11.205	32.955	1.55635	1.95485e-07	1.06617e-05	yes	-	-	-	-	-	-
ENSDARG00000068232	13	37.5	1.86	5.47	1.55624	0.00227899	0.0316077	yes	cbln12	-	-	-	-	-
ENSDARG00000057231	133.5	389	8.965	26.355	1.5557	1.08116e-08	7.53633e-07	yes	rorca	RAR-related orphan receptor C a [Source:ZFIN;Acc:ZDB-GENE-990415-250]	-	GO:0005634//nucleus;GO:0005575//cellular_component;GO:0005622//intracellular;GO:0005623//cell;GO:0043226//organelle	GO:0003677//DNA binding;GO:0003700//sequence-specific DNA binding transcription factor activity;GO:0003707//steroid hormone receptor activity;GO:0008270//zinc ion binding;GO:0046872//metal ion binding;GO:0043565//sequence-specific DNA binding;GO:0004879//ligand-activated sequence-specific DNA binding RNA polymerase II transcription factor activity;GO:0001071//nucleic acid binding transcription fa…	GO:0043401//steroid hormone mediated signaling pathway;GO:0006355//regulation of transcription, DNA-templated;GO:0006351//transcription, DNA-templated;GO:0008150//biological_process;GO:0009058//biosynthetic process;GO:0034641//cellular nitrogen compound metabolic process;GO:0007165//signal transduction
ENSDARG00000035120	175.5	511.5	7.68	22.535	1.55299	4.99249e-13	5.70852e-11	yes	GLDC	-	-	-	-	-
ENSDARG00000102129	36.5	106	7.66	22.435	1.55033	2.78056e-06	0.00011488	yes	crygn1	crystallin, gamma N1 [Source:ZFIN;Acc:ZDB-GENE-050225-1]	-	GO:0005575//cellular_component;GO:0005575//cellular_component	GO:0005212//structural constituent of eye lens;GO:0003674//molecular_function;GO:0005198//structural molecule activity	GO:0008150//biological_process;GO:0008150//biological_process
ENSDARG00000053366	10	30	1.15	3.35	1.54253	0.000656123	0.0117804	yes	ftr12	finTRIM family, member 12 [Source:ZFIN;Acc:ZDB-GENE-070912-196]	-	GO:0005575//cellular_component;GO:0005622//intracellular;GO:0005623//cell	GO:0003674//molecular_function;GO:0043167//ion binding	-
ENSDARG00000042956	49.5	141.5	4.12	11.96	1.5375	1.01025e-06	4.64501e-05	yes	cyp2ad6	cytochrome P450, family 2, subfamily AD, polypeptide 6 [Source:ZFIN;Acc:ZDB-GENE-041001-157]	-	GO:0043231//intracellular membrane-bounded organelle;GO:0005737//cytoplasm;GO:0005575//cellular_component;GO:0005622//intracellular;GO:0005623//cell;GO:0005737//cytoplasm;GO:0043226//organelle	GO:0016712//oxidoreductase activity, acting on paired donors, with incorporation or reduction of molecular oxygen, reduced flavin or flavoprotein as one donor, and incorporation of one atom of oxygen;GO:0008392//arachidonic acid epoxygenase activity;GO:0016705//oxidoreductase activity, acting on paired donors, with incorporation or reduction of molecular oxygen;GO:0020037//heme binding;GO:0005506…	GO:0055114//oxidation-reduction process;GO:0042738//exogenous drug catabolic process;GO:0019369//arachidonic acid metabolic process;GO:0006805//xenobiotic metabolic process;GO:0008150//biological_process;GO:0006629//lipid metabolic process;GO:0044281//small molecule metabolic process;GO:0009056//catabolic process
ENSDARG00000102555	179.5	517	31.795	92.235	1.53651	4.20919e-11	3.91905e-09	yes	si:dkey-33i11.9	-	-	-	-	-
ENSDARG00000055876	150	433	13.63	39.485	1.53452	1.55791e-10	1.34486e-08	yes	msmo1	-	-	-	-	-
ENSDARG00000017947	9	26	0.615	1.78	1.53322	0.00161293	0.0243758	yes	ptk6a	-	-	-	-	-
ENSDARG00000068220	26.5	76	3.96	11.435	1.52988	2.60479e-05	0.000800788	yes	hbl3	-	-	GO:0005581//collagen trimer;GO:0005575//cellular_component;GO:0043234//protein complex	GO:0030246//carbohydrate binding;GO:0003674//molecular_function	-
ENSDARG00000054588	38	108	18.865	54.38	1.52736	2.92352e-05	0.000885207	yes	cox6a2	cytochrome c oxidase subunit VIa polypeptide 2 [Source:ZFIN;Acc:ZDB-GENE-040912-129]	ko01100//Metabolic pathways;ko05010//Alzheimer's disease;ko05016//Huntington's disease;ko00190//Oxidative phosphorylation;ko05012//Parkinson's disease;ko04260//Cardiac muscle contraction	GO:0005739//mitochondrion;GO:0005743//mitochondrial inner membrane;GO:0005751//mitochondrial respiratory chain complex IV;GO:0016020//membrane;GO:0005575//cellular_component;GO:0005622//intracellular;GO:0005623//cell;GO:0005737//cytoplasm;GO:0043226//organelle;GO:0043234//protein complex	GO:0004129//cytochrome-c oxidase activity;GO:0003674//molecular_function;GO:0016491//oxidoreductase activity;GO:0022857//transmembrane transporter activity	-
ENSDARG00000091650	20	57	2.475	7.13	1.52647	4.97873e-05	0.0013867	yes	igflr1	-	-	-	-	-
ENSDARG00000016483	31.5	89.5	1.935	5.57	1.52534	2.27792e-05	0.000718728	yes	baiap2l2a	BAI1-associated protein 2-like 2a [Source:ZFIN;Acc:ZDB-GENE-040108-10]	-	GO:0005575//cellular_component;GO:0005622//intracellular;GO:0005623//cell;GO:0005737//cytoplasm;GO:0005829//cytosol;GO:0005634//nucleus;GO:0005654//nucleoplasm;GO:0043226//organelle;GO:0005856//cytoskeleton	GO:0003674//molecular_function;GO:0008092//cytoskeletal protein binding;GO:0030674//protein binding, bridging	GO:0008150//biological_process;GO:0007165//signal transduction;GO:0007009//plasma membrane organization;GO:0061024//membrane organization;GO:0007010//cytoskeleton organization
ENSDARG00000062947	25	71	2.205	6.31	1.51686	1.69412e-05	0.000554846	yes	amn	-	-	-	-	-
ENSDARG00000079544	31	87.5	7.21	20.545	1.51072	1.60624e-05	0.000529389	yes	si:ch1073-464p5.5	-	-	-	-	-
ENSDARG00000038185	75	211.5	9.8	27.89	1.50889	1.19764e-08	8.27328e-07	yes	gh1	growth hormone 1 [Source:ZFIN;Acc:ZDB-GENE-030725-2]	ko04080//Neuroactive ligand-receptor interaction;ko04060//Cytokine-cytokine receptor interaction;ko04630//Jak-STAT signaling pathway	GO:0005576//extracellular region;GO:0005575//cellular_component	GO:0005179//hormone activity;GO:0003674//molecular_function	GO:0060612//adipose tissue development;GO:0050996//positive regulation of lipid catabolic process;GO:0008150//biological_process;GO:0048856//anatomical structure development
ENSDARG00000023820	611.5	1731.5	39.105	111.11	1.50656	1.08136e-13	1.32353e-11	yes	faxdc2	fatty acid hydroxylase domain containing 2 [Source:ZFIN;Acc:ZDB-GENE-040426-2907]	ko01100//Metabolic pathways;ko00100//Steroid biosynthesis	GO:0016021//integral component of membrane;GO:0016020//membrane;GO:0005575//cellular_component	GO:0016491//oxidoreductase activity;GO:0005506//iron ion binding;GO:0003674//molecular_function;GO:0043167//ion binding	GO:0006633//fatty acid biosynthetic process;GO:0055114//oxidation-reduction process;GO:0008150//biological_process;GO:0006629//lipid metabolic process;GO:0009058//biosynthetic process;GO:0044281//small molecule metabolic process
ENSDARG00000100955	47	132.5	2	5.665	1.50208	5.36429e-07	2.63862e-05	yes	stk24a	serine/threonine kinase 24a (STE20 homolog, yeast) [Source:ZFIN;Acc:ZDB-GENE-070424-52]	-	GO:0005737//cytoplasm;GO:0005575//cellular_component;GO:0005622//intracellular;GO:0005623//cell;GO:0005737//cytoplasm	GO:0005524//ATP binding;GO:0016772//transferase activity, transferring phosphorus-containing groups;GO:0004702//receptor signaling protein serine/threonine kinase activity;GO:0004672//protein kinase activity;GO:0000166//nucleotide binding;GO:0003674//molecular_function;GO:0016301//kinase activity;GO:0004871//signal transducer activity;GO:0043167//ion binding	GO:0006468//protein phosphorylation;GO:0006915//apoptotic process;GO:0045595//regulation of cell differentiation;GO:0008150//biological_process;GO:0008219//cell death;GO:0006464//cellular protein modification process
ENSDARG00000016536	39.5	111.5	1.96	5.55	1.50163	1.8385e-05	0.000596434	yes	npas2	neuronal PAS domain protein 2 [Source:ZFIN;Acc:ZDB-GENE-030408-3]	-	GO:0005667//transcription factor complex;GO:0005737//cytoplasm;GO:0005634//nucleus;GO:0005575//cellular_component;GO:0005622//intracellular;GO:0005623//cell;GO:0043226//organelle;GO:0043234//protein complex	GO:0003690//double-stranded DNA binding;GO:0003700//sequence-specific DNA binding transcription factor activity;GO:0003677//DNA binding;GO:0004871//signal transducer activity;GO:0046983//protein dimerization activity;GO:0003674//molecular_function;GO:0001071//nucleic acid binding transcription factor activity	GO:0009648//photoperiodism;GO:0006351//transcription, DNA-templated;GO:0006355//regulation of transcription, DNA-templated;GO:0007623//circadian rhythm;GO:0007165//signal transduction;GO:0009416//response to light stimulus;GO:0008150//biological_process;GO:0009058//biosynthetic process;GO:0034641//cellular nitrogen compound metabolic process
ENSDARG00000020866	2257	6227	430.29	1217.31	1.50032	4.15796e-11	3.88523e-09	yes	apoa4b.2	apolipoprotein A-IV b, tandem duplicate 2 [Source:ZFIN;Acc:ZDB-GENE-030131-3143]	-	GO:0042627//chylomicron;GO:0005576//extracellular region;GO:0034364//high-density lipoprotein particle;GO:0072562//blood microparticle;GO:0005575//cellular_component;GO:0005615//extracellular space	GO:0017127//cholesterol transporter activity;GO:0031210//phosphatidylcholine binding;GO:0008289//lipid binding;GO:0060228//phosphatidylcholine-sterol O-acyltransferase activator activity;GO:0015485//cholesterol binding;GO:0003674//molecular_function;GO:0030234//enzyme regulator activity;GO:0043167//ion binding	GO:0034372//very-low-density lipoprotein particle remodeling;GO:0010898//positive regulation of triglyceride catabolic process;GO:0042632//cholesterol homeostasis;GO:0043691//reverse cholesterol transport;GO:0045723//positive regulation of fatty acid biosynthetic process;GO:0046470//phosphatidylcholine metabolic process;GO:0030300//regulation of intestinal cholesterol absorption;GO:0010873//posit…
ENSDARG00000017489	17	47.5	6.11	17.285	1.50028	0.000602948	0.0110153	yes	zgc:123068	zgc:123068 [Source:ZFIN;Acc:ZDB-GENE-051030-98]	-	GO:0016021//integral component of membrane;GO:0005575//cellular_component	GO:0003674//molecular_function;GO:0003674//molecular_function	GO:0008150//biological_process;GO:0008150//biological_process
ENSDARG00000059956	56.5	159	3.285	9.28	1.49823	2.11568e-07	1.14669e-05	yes	ptk6b	PTK6 protein tyrosine kinase 6b [Source:ZFIN;Acc:ZDB-GENE-060929-1150]	-	GO:0031234//extrinsic component of cytoplasmic side of plasma membrane;GO:0005575//cellular_component;GO:0005622//intracellular;GO:0005623//cell;GO:0005886//plasma membrane	GO:0016740//transferase activity;GO:0005524//ATP binding;GO:0016772//transferase activity, transferring phosphorus-containing groups;GO:0004713//protein tyrosine kinase activity;GO:0016301//kinase activity;GO:0000166//nucleotide binding;GO:0004715//non-membrane spanning protein tyrosine kinase activity;GO:0005102//receptor binding;GO:0004672//protein kinase activity;GO:0003674//molecular_function…	GO:0030154//cell differentiation;GO:0007173//epidermal growth factor receptor signaling pathway;GO:0042127//regulation of cell proliferation;GO:0038083//peptidyl-tyrosine autophosphorylation;GO:0006468//protein phosphorylation;GO:0042981//regulation of apoptotic process;GO:0048008//platelet-derived growth factor receptor signaling pathway;GO:0045087//innate immune response;GO:0016310//phosphoryla…
ENSDARG00000013771	48.5	148	8.645	24.395	1.49665	2.29395e-07	1.2356e-05	yes	ctssb.2	cathepsin Sb, tandem duplicate 2 [Source:ZFIN;Acc:ZDB-GENE-050626-55]	ko05152//Tuberculosis;ko04145//Phagosome;ko04142//Lysosome;ko04612//Antigen processing and presentation	GO:0005575//cellular_component;GO:0005575//cellular_component	GO:0008233//peptidase activity;GO:0008234//cysteine-type peptidase activity;GO:0016787//hydrolase activity;GO:0003674//molecular_function	GO:0006508//proteolysis;GO:0008150//biological_process
ENSDARG00000023759	20	55.5	1.145	3.23	1.49619	0.000298805	0.00629208	yes	zgc:73226	zgc:73226 [Source:ZFIN;Acc:ZDB-GENE-050703-8]	-	GO:0005635//nuclear envelope;GO:0016021//integral component of membrane;GO:0005783//endoplasmic reticulum;GO:0005741//mitochondrial outer membrane;GO:0005740//mitochondrial envelope;GO:0005575//cellular_component;GO:0005622//intracellular;GO:0005623//cell;GO:0005737//cytoplasm;GO:0005739//mitochondrion;GO:0043226//organelle;GO:0005783//endoplasmic reticulum;GO:0005634//nucleus;GO:0005635//nuclear…	GO:0003674//molecular_function;GO:0003674//molecular_function	GO:0043069//negative regulation of programmed cell death;GO:0051607//defense response to virus;GO:0043065//positive regulation of apoptotic process;GO:0006810//transport;GO:0007005//mitochondrion organization;GO:0007165//signal transduction;GO:0008150//biological_process;GO:0008219//cell death;GO:0061024//membrane organization;GO:0002376//immune system process;GO:0006950//response to stress
ENSDARG00000061496	9	25	1.63	4.595	1.49519	0.00273662	0.0359988	yes	si:ch211-250e5.2	-	-	-	-	-
ENSDARG00000074118	9	25	0.94	2.635	1.48707	0.00241403	0.0329841	yes	ftr15	finTRIM family, member 15 [Source:ZFIN;Acc:ZDB-GENE-070912-394]	-	-	GO:0003674//molecular_function;GO:0043167//ion binding	-
ENSDARG00000090844	9	25	0.635	1.78	1.48705	0.00356621	0.0441134	yes	CABZ01054965.1	-	-	-	-	-
ENSDARG00000067701	41.5	115	5.57	15.595	1.48533	2.5104e-06	0.000104714	yes	myoz3a	-	-	-	-	-
ENSDARG00000002986	59	165	4.26	11.925	1.48506	2.99433e-06	0.000122355	yes	gda	-	ko01100//Metabolic pathways;ko00230//Purine metabolism	GO:0005575//cellular_component;GO:0005575//cellular_component	GO:0016810//hydrolase activity, acting on carbon-nitrogen (but not peptide) bonds;GO:0008892//guanine deaminase activity;GO:0016787//hydrolase activity;GO:0008270//zinc ion binding;GO:0003674//molecular_function;GO:0043167//ion binding	GO:0006147//guanine catabolic process;GO:0008150//biological_process;GO:0009056//catabolic process;GO:0034641//cellular nitrogen compound metabolic process;GO:0044281//small molecule metabolic process
ENSDARG00000032469	191.5	419.5	11.74	32.845	1.48424	2.7371e-07	1.45543e-05	yes	ampd3b	adenosine monophosphate deaminase 3b [Source:ZFIN;Acc:ZDB-GENE-030131-5929]	ko01100//Metabolic pathways;ko00230//Purine metabolism	GO:0005575//cellular_component;GO:0005575//cellular_component	GO:0003876//AMP deaminase activity;GO:0019239//deaminase activity;GO:0003674//molecular_function;GO:0016810//hydrolase activity, acting on carbon-nitrogen (but not peptide) bonds	GO:0032264//IMP salvage;GO:0009168//purine ribonucleoside monophosphate biosynthetic process;GO:0008150//biological_process;GO:0009058//biosynthetic process;GO:0034641//cellular nitrogen compound metabolic process;GO:0044281//small molecule metabolic process
ENSDARG00000054184	19.5	54	0.84	2.35	1.4842	0.00087968	0.01495	yes	btr06	-	-	GO:0005622//intracellular;GO:0005575//cellular_component;GO:0005623//cell	GO:0046872//metal ion binding;GO:0008270//zinc ion binding;GO:0003674//molecular_function;GO:0043167//ion binding	GO:0008150//biological_process;GO:0008150//biological_process
ENSDARG00000036135	59	165	3.7	10.35	1.48403	5.84454e-07	2.84267e-05	yes	bbox1	butyrobetaine (gamma), 2-oxoglutarate dioxygenase (gamma-butyrobetaine hydroxylase) 1 [Source:ZFIN;Acc:ZDB-GENE-050417-218]	ko00310//Lysine degradation	-	GO:0016491//oxidoreductase activity;GO:0016706//oxidoreductase activity, acting on paired donors, with incorporation or reduction of molecular oxygen, 2-oxoglutarate as one donor, and incorporation of one atom each of oxygen into both donors;GO:0005506//iron ion binding;GO:0003674//molecular_function;GO:0043167//ion binding	GO:0055114//oxidation-reduction process;GO:0045329//carnitine biosynthetic process;GO:0008150//biological_process;GO:0009058//biosynthetic process;GO:0034641//cellular nitrogen compound metabolic process;GO:0044281//small molecule metabolic process
ENSDARG00000077782	10.5	29	1.41	3.94	1.4825	0.00222271	0.0309707	yes	ACER2	-	-	-	-	-
ENSDARG00000099873	28	73.5	5.09	14.22	1.48218	5.62097e-05	0.00154089	yes	zgc:163083	-	-	GO:0005575//cellular_component;GO:0005575//cellular_component	GO:0016491//oxidoreductase activity;GO:0003674//molecular_function	GO:0008152//metabolic process;GO:0008150//biological_process
ENSDARG00000076426	59	165	2.13	5.95	1.48204	7.08802e-07	3.39678e-05	yes	dsg2l	desmoglein 2 like [Source:ZFIN;Acc:ZDB-GENE-120229-2]	-	GO:0005575//cellular_component;GO:0005623//cell;GO:0005886//plasma membrane	GO:0003674//molecular_function;GO:0043167//ion binding	GO:0007155//cell adhesion;GO:0008150//biological_process
ENSDARG00000040255	188	522	11.875	33.13	1.48021	1.30143e-10	1.13473e-08	yes	ephx2	-	ko01100//Metabolic pathways;ko04146//Peroxisome;ko00590//Arachidonic acid metabolism	-	GO:0004301//epoxide hydrolase activity;GO:0016787//hydrolase activity;GO:0003824//catalytic activity;GO:0003674//molecular_function	GO:0002244//hematopoietic progenitor cell differentiation;GO:0060841//venous blood vessel development;GO:0008150//biological_process;GO:0048856//anatomical structure development;GO:0002376//immune system process;GO:0030154//cell differentiation
ENSDARG00000044935	510	1415.5	45.575	127.135	1.48005	1.60424e-13	1.94523e-11	yes	hpdb	4-hydroxyphenylpyruvate dioxygenase b [Source:ZFIN;Acc:ZDB-GENE-040808-62]	ko01100//Metabolic pathways;ko00350//Tyrosine metabolism;ko00360//Phenylalanine metabolism;ko00130//Ubiquinone and other terpenoid-quinone biosynthesis	GO:0005575//cellular_component;GO:0005575//cellular_component	GO:0051213//dioxygenase activity;GO:0003868//4-hydroxyphenylpyruvate dioxygenase activity;GO:0016491//oxidoreductase activity;GO:0046872//metal ion binding;GO:0016701//oxidoreductase activity, acting on single donors with incorporation of molecular oxygen;GO:0003674//molecular_function;GO:0043167//ion binding	GO:0055114//oxidation-reduction process;GO:0009072//aromatic amino acid family metabolic process;GO:0006520//cellular amino acid metabolic process;GO:0008150//biological_process;GO:0044281//small molecule metabolic process
ENSDARG00000040427	13	36.5	0.965	2.69	1.47901	0.0034705	0.0432692	yes	zgc:101553	zgc:101553 [Source:ZFIN;Acc:ZDB-GENE-041114-124]	-	GO:0005575//cellular_component;GO:0005575//cellular_component	GO:0016790//thiolester hydrolase activity;GO:0003674//molecular_function	GO:0006637//acyl-CoA metabolic process;GO:0006790//sulfur compound metabolic process;GO:0008150//biological_process;GO:0051186//cofactor metabolic process
ENSDARG00000077201	109	302.5	2	5.565	1.47638	5.07808e-09	3.67738e-07	yes	myo7bb	myosin VIIBb [Source:ZFIN;Acc:ZDB-GENE-070912-482]	-	GO:0005575//cellular_component;GO:0005622//intracellular;GO:0005623//cell;GO:0005856//cytoskeleton;GO:0043226//organelle;GO:0043234//protein complex	GO:0003674//molecular_function;GO:0043167//ion binding	-
ENSDARG00000019932	51	141.5	2.88	7.995	1.47303	9.33694e-07	4.33893e-05	yes	slc5a11	solute carrier family 5 (sodium/inositol cotransporter), member 11 [Source:ZFIN;Acc:ZDB-GENE-041114-9]	-	GO:0016020//membrane;GO:0016021//integral component of membrane;GO:0005575//cellular_component	GO:0005215//transporter activity;GO:0003674//molecular_function	GO:0055085//transmembrane transport;GO:0006810//transport;GO:0008150//biological_process
ENSDARG00000053119	12	32	1.195	3.31	1.46982	0.00163364	0.0246179	yes	smpdl3a	-	-	GO:0005615//extracellular space;GO:0005575//cellular_component;GO:0005576//extracellular region	GO:0016787//hydrolase activity;GO:0004767//sphingomyelin phosphodiesterase activity;GO:0003674//molecular_function	GO:0006685//sphingomyelin catabolic process;GO:0006629//lipid metabolic process;GO:0008150//biological_process;GO:0009056//catabolic process;GO:0034641//cellular nitrogen compound metabolic process;GO:0044281//small molecule metabolic process
ENSDARG00000076179	103	283	2.49	6.875	1.46521	9.00256e-09	6.36633e-07	yes	ngef	neuronal guanine nucleotide exchange factor [Source:ZFIN;Acc:ZDB-GENE-130530-794]	-	-	-	GO:0008150//biological_process
ENSDARG00000030530	40	108	1.845	5.07	1.45836	4.5137e-05	0.00127904	yes	slc22a2	solute carrier family 22 (organic cation transporter), member 2 [Source:ZFIN;Acc:ZDB-GENE-040426-2167]	-	GO:0016021//integral component of membrane;GO:0016020//membrane;GO:0005575//cellular_component	GO:0022857//transmembrane transporter activity;GO:0005215//transporter activity;GO:0015075//ion transmembrane transporter activity;GO:0003674//molecular_function	GO:0055085//transmembrane transport;GO:0034220//ion transmembrane transport;GO:0006810//transport;GO:0008150//biological_process
ENSDARG00000088836	17	47.5	0.69	1.895	1.45753	0.000707489	0.0125301	yes	si:dkey-16p6.1	-	-	-	-	-
ENSDARG00000099525	245	667.5	16.405	44.935	1.4537	1.74944e-09	1.34537e-07	yes	si:ch1073-13h15.3	-	ko00830//Retinol metabolism	-	-	-
ENSDARG00000045979	575	1552	108.31	296.355	1.45216	6.01034e-13	6.75386e-11	yes	zgc:153704	zgc:153704 [Source:ZFIN;Acc:ZDB-GENE-060929-1114]	-	GO:0005576//extracellular region;GO:0005575//cellular_component	GO:0005215//transporter activity;GO:0036094//small molecule binding;GO:0003674//molecular_function	GO:0006629//lipid metabolic process;GO:0006810//transport;GO:0008150//biological_process
ENSDARG00000074390	384.5	1034	38.595	105.35	1.4487	6.55422e-11	5.87177e-09	yes	tmem176l.4	-	-	GO:0016021//integral component of membrane;GO:0005575//cellular_component	-	-
ENSDARG00000056915	24	65.5	4.195	11.43	1.44608	7.44757e-05	0.00195527	yes	si:ch211-237l4.6	-	-	-	-	-
ENSDARG00000026548	13	35	1.085	2.955	1.44546	0.00111562	0.0182003	yes	cyp2u1	cytochrome P450, family 2, subfamily U, polypeptide 1 [Source:ZFIN;Acc:ZDB-GENE-070730-1]	ko01100//Metabolic pathways;ko00590//Arachidonic acid metabolism	GO:0043231//intracellular membrane-bounded organelle;GO:0005737//cytoplasm;GO:0005575//cellular_component;GO:0005622//intracellular;GO:0005623//cell;GO:0005737//cytoplasm;GO:0043226//organelle	GO:0016491//oxidoreductase activity;GO:0004497//monooxygenase activity;GO:0016705//oxidoreductase activity, acting on paired donors, with incorporation or reduction of molecular oxygen;GO:0005506//iron ion binding;GO:0046872//metal ion binding;GO:0008395//steroid hydroxylase activity;GO:0020037//heme binding;GO:0016712//oxidoreductase activity, acting on paired donors, with incorporation or reduc…	GO:0055114//oxidation-reduction process;GO:0006082//organic acid metabolic process;GO:0042738//exogenous drug catabolic process;GO:0006805//xenobiotic metabolic process;GO:0008150//biological_process;GO:0009056//catabolic process;GO:0044281//small molecule metabolic process
ENSDARG00000099313	210.5	564.5	16.955	45.935	1.43788	1.46955e-11	1.43487e-09	yes	naga	N-acetylgalactosaminidase, alpha [Source:ZFIN;Acc:ZDB-GENE-051113-256]	ko04142//Lysosome;ko00603//Glycosphingolipid biosynthesis - globo series	GO:0005737//cytoplasm;GO:0005575//cellular_component;GO:0005622//intracellular;GO:0005623//cell;GO:0005737//cytoplasm	GO:0016787//hydrolase activity;GO:0003824//catalytic activity;GO:0016798//hydrolase activity, acting on glycosyl bonds;GO:0004553//hydrolase activity, hydrolyzing O-glycosyl compounds;GO:0004557//alpha-galactosidase activity;GO:0003674//molecular_function	GO:0005975//carbohydrate metabolic process;GO:0009311//oligosaccharide metabolic process;GO:0016139//glycoside catabolic process;GO:0046477//glycosylceramide catabolic process;GO:0008152//metabolic process;GO:0008150//biological_process;GO:0006629//lipid metabolic process;GO:0009056//catabolic process;GO:0034641//cellular nitrogen compound metabolic process
ENSDARG00000070021	27.5	74.5	1.635	4.415	1.43312	0.000104624	0.0026076	yes	cyp3c4	-	-	GO:0005575//cellular_component;GO:0005575//cellular_component	GO:0016705//oxidoreductase activity, acting on paired donors, with incorporation or reduction of molecular oxygen;GO:0020037//heme binding;GO:0016491//oxidoreductase activity;GO:0004497//monooxygenase activity;GO:0005506//iron ion binding;GO:0046872//metal ion binding;GO:0003674//molecular_function;GO:0043167//ion binding	GO:0055114//oxidation-reduction process;GO:0008150//biological_process
ENSDARG00000070331	649.5	1663.5	5.685	15.32	1.43018	1.97757e-07	1.07407e-05	yes	muc5.1	mucin 5.1, oligomeric mucus/gel-forming [Source:ZFIN;Acc:ZDB-GENE-120822-1]	-	GO:0005575//cellular_component;GO:0005576//extracellular region	-	-
ENSDARG00000008788	140	405.5	4.745	12.765	1.42771	9.37771e-12	9.40296e-10	yes	camk1gb	-	-	GO:0005634//nucleus;GO:0005737//cytoplasm;GO:0005575//cellular_component;GO:0005622//intracellular;GO:0005623//cell;GO:0005737//cytoplasm;GO:0005634//nucleus;GO:0043226//organelle	GO:0004674//protein serine/threonine kinase activity;GO:0004672//protein kinase activity;GO:0005524//ATP binding;GO:0009931//calcium-dependent protein serine/threonine kinase activity;GO:0016740//transferase activity;GO:0016772//transferase activity, transferring phosphorus-containing groups;GO:0005516//calmodulin binding;GO:0004683//calmodulin-dependent protein kinase activity;GO:0016301//kinase…	GO:0045475//locomotor rhythm;GO:0016310//phosphorylation;GO:0006468//protein phosphorylation;GO:0035556//intracellular signal transduction;GO:0018105//peptidyl-serine phosphorylation;GO:0046777//protein autophosphorylation;GO:0006464//cellular protein modification process;GO:0008150//biological_process;GO:0007165//signal transduction
ENSDARG00000102076	18.5	49	5.155	13.815	1.42219	0.000820343	0.014126	yes	SPINK2	serine peptidase inhibitor, Kazal type 2 (acrosin-trypsin inhibitor) [Source:HGNC Symbol;Acc:HGNC:11245]	-	-	GO:0004867//serine-type endopeptidase inhibitor activity;GO:0003674//molecular_function;GO:0030234//enzyme regulator activity	-
ENSDARG00000062906	15	39.5	1.09	2.92	1.42164	0.00108243	0.0177366	yes	kcnv2b	potassium channel, subfamily V, member 2b [Source:ZFIN;Acc:ZDB-GENE-060526-28]	-	GO:0016021//integral component of membrane;GO:0008076//voltage-gated potassium channel complex;GO:0016020//membrane;GO:0005575//cellular_component;GO:0005623//cell;GO:0005886//plasma membrane;GO:0043234//protein complex	GO:0005244//voltage-gated ion channel activity;GO:0005249//voltage-gated potassium channel activity;GO:0005267//potassium channel activity;GO:0005216//ion channel activity;GO:0005251//delayed rectifier potassium channel activity;GO:0003674//molecular_function;GO:0022857//transmembrane transporter activity	GO:0034765//regulation of ion transmembrane transport;GO:0006811//ion transport;GO:0055085//transmembrane transport;GO:0006813//potassium ion transport;GO:0071805//potassium ion transmembrane transport;GO:0006810//transport;GO:0051260//protein homooligomerization;GO:0006461//protein complex assembly;GO:0008150//biological_process;GO:0022607//cellular component assembly;GO:0065003
ENSDARG00000006427	2545	6924	413.865	1106.29	1.41849	1.55631e-12	1.67657e-10	yes	fabp2	fatty acid binding protein 2, intestinal [Source:ZFIN;Acc:ZDB-GENE-991019-5]	ko03320//PPAR signaling pathway;ko04975//Fat digestion and absorption	-	GO:0008289//lipid binding;GO:0005215//transporter activity;GO:0003674//molecular_function	GO:0006810//transport;GO:0008150//biological_process
ENSDARG00000037805	27.5	73.5	1.945	5.19	1.41596	0.000145316	0.00347878	yes	lgals3bpa	-	-	-	-	-
ENSDARG00000093619	49.5	131.5	5.93	15.785	1.41245	0.000152755	0.00363681	yes	sult3st2	sulfotransferase family 3, cytosolic sulfotransferase 2 [Source:ZFIN;Acc:ZDB-GENE-030131-1135]	-	-	GO:0008146//sulfotransferase activity;GO:0018721;GO:0018724;GO:0018727;GO:0050694//galactose 3-O-sulfotransferase activity;GO:0080131//hydroxyjasmonate sulfotransferase activity;GO:0001537//N-acetylgalactosamine 4-O-sulfotransferase activity;GO:0016232//HNK-1 sulfotransferase activity;GO:0018722;GO:0018725;GO:0019111;GO:0050698//proteoglycan sulfotransferase activity;GO:0004394//heparan sulfate 2…	-
ENSDARG00000016750	15.5	41.5	0.305	0.81	1.40911	0.000848678	0.0144987	yes	abcc6a	ATP-binding cassette, sub-family C (CFTR/MRP), member 6a [Source:ZFIN;Acc:ZDB-GENE-050517-18]	-	GO:0005575//cellular_component	GO:0003674//molecular_function;GO:0016887//ATPase activity;GO:0022857//transmembrane transporter activity;GO:0043167//ion binding	GO:0006810//transport;GO:0008150//biological_process;GO:0055085//transmembrane transport;GO:0009790//embryo development;GO:0048856//anatomical structure development
ENSDARG00000104418	102.5	268	30.755	81.645	1.40854	3.03538e-07	1.59537e-05	yes	-	-	-	-	-	-
ENSDARG00000012881	364.5	960	13.875	36.605	1.39955	1.05459e-11	1.05337e-09	yes	slc4a1a	solute carrier family 4 (anion exchanger), member 1a (Diego blood group) [Source:ZFIN;Acc:ZDB-GENE-010525-1]	-	GO:0016020//membrane;GO:0016021//integral component of membrane;GO:0005887//integral component of plasma membrane;GO:0005575//cellular_component;GO:0005623//cell;GO:0005886//plasma membrane;GO:0016020//membrane;GO:0016021//integral component of membrane;GO:0005887//integral component of plasma membrane;GO:0005575//cellular_component;GO:0005623//cell;GO:0005886//plasma membrane	GO:0005452//inorganic anion exchanger activity;GO:0005515//protein binding;GO:0008509//anion transmembrane transporter activity;GO:0005215//transporter activity;GO:0003674//molecular_function;GO:0022857//transmembrane transporter activity;GO:0005452//inorganic anion exchanger activity;GO:0005515//protein binding;GO:0008509//anion transmembrane transporter activity;GO:0005215//transporter activity…	GO:0035162//embryonic hemopoiesis;GO:0006820//anion transport;GO:0030218//erythrocyte differentiation;GO:0015701//bicarbonate transport;GO:0051453//regulation of intracellular pH;GO:0006810//transport;GO:0008150//biological_process;GO:0042592//homeostatic process;GO:0002376//immune system process;GO:0030154//cell differentiation;GO:0048856//anatomical structure development;GO:0055085//transmembra…
ENSDARG00000104642	94.5	246.5	13.325	35.14	1.39898	2.77745e-08	1.80569e-06	yes	si:dkey-201i2.1	-	-	-	-	-
ENSDARG00000074698	74.5	195.5	7.26	19.11	1.39629	6.65978e-07	3.20333e-05	yes	sdsl	-	-	-	-	-
XLOC_018452	50.5	131	3.56	9.365	1.3954	9.11126e-06	0.000320987	yes	TCONS_00045487	PREDICTED: fibronectin type III domain-containing protein 7-like, partial [Danio rerio]	-	-	-	-
ENSDARG00000059001	45.5	118.5	3.155	8.295	1.3946	4.56638e-06	0.000177751	yes	pim2	-	-	-	-	-
ENSDARG00000018263	343.5	899	26.255	68.955	1.39306	3.8979e-10	3.18553e-08	yes	pdia2	-	-	-	-	-
ENSDARG00000020952	164.5	432.5	7.685	20.17	1.39209	1.62949e-08	1.09769e-06	yes	NAALADL1	-	-	-	-	-
ENSDARG00000056462	27.5	73	6.935	18.155	1.3884	7.2869e-05	0.00191888	yes	crp2	-	-	GO:0005575//cellular_component;GO:0005575//cellular_component;GO:0005575//cellular_component;GO:0005575//cellular_component	GO:0003674//molecular_function;GO:0003674//molecular_function;GO:0003674//molecular_function;GO:0003674//molecular_function	GO:0009617//response to bacterium;GO:0008150//biological_process;GO:0009617//response to bacterium;GO:0008150//biological_process;GO:0008150//biological_process;GO:0008150//biological_process;GO:0008150//biological_process;GO:0008150//biological_process
ENSDARG00000042641	253.5	656.5	16.785	43.85	1.3854	9.68306e-11	8.52829e-09	yes	cyp51	cytochrome P450, family 51 [Source:ZFIN;Acc:ZDB-GENE-040625-2]	ko01100//Metabolic pathways;ko00100//Steroid biosynthesis	-	GO:0008398//sterol 14-demethylase activity;GO:0004497//monooxygenase activity;GO:0016705//oxidoreductase activity, acting on paired donors, with incorporation or reduction of molecular oxygen;GO:0020037//heme binding;GO:0005506//iron ion binding;GO:0016491//oxidoreductase activity;GO:0046872//metal ion binding;GO:0008168//methyltransferase activity;GO:0016740//transferase activity;GO:0003674//mol…	GO:0001878//response to yeast;GO:0032259//methylation;GO:0055114//oxidation-reduction process;GO:0008150//biological_process
ENSDARG00000033285	226	585.5	36.305	94.825	1.3851	1.98288e-10	1.67391e-08	yes	gsto2	-	ko05200//Pathways in cancer;ko05215//Prostate cancer;ko00480//Glutathione metabolism;ko00980//Metabolism of xenobiotics by cytochrome P450;ko00982//Drug metabolism - cytochrome P450	GO:0005737//cytoplasm;GO:0005575//cellular_component;GO:0005622//intracellular;GO:0005623//cell	GO:0004364//glutathione transferase activity;GO:0003674//molecular_function;GO:0016765//transferase activity, transferring alkyl or aryl (other than methyl) groups	GO:0008152//metabolic process;GO:0008150//biological_process
ENSDARG00000014556	771.5	1987	103.72	270.74	1.38421	5.63292e-13	6.35715e-11	yes	serpinb1l3	-	-	GO:0005615//extracellular space;GO:0005575//cellular_component;GO:0005576//extracellular region;GO:0005615//extracellular space	GO:0004867//serine-type endopeptidase inhibitor activity;GO:0003674//molecular_function;GO:0030234//enzyme regulator activity	-
ENSDARG00000055722	80.5	193.5	3.22	8.4	1.38333	7.01437e-05	0.00185461	yes	bco2a	-	-	-	-	-
ENSDARG00000053241	21.5	59.5	1.82	4.73	1.3779	9.5458e-05	0.00241376	yes	sts	steroid sulfatase (microsomal), isozyme S [Source:ZFIN;Acc:ZDB-GENE-030717-5]	ko00140//Steroid hormone biosynthesis	-	GO:0003674//molecular_function	GO:0008150//biological_process
ENSDARG00000019228	146.5	382	13.885	36.08	1.37767	5.0146e-09	3.64152e-07	yes	mogat2	-	ko04975//Fat digestion and absorption	-	GO:0016740//transferase activity;GO:0016747//transferase activity, transferring acyl groups other than amino-acyl groups;GO:0016746//transferase activity, transferring acyl groups;GO:0003674//molecular_function	GO:0001878//response to yeast;GO:0008150//biological_process
ENSDARG00000077207	18.5	47.5	1.12	2.895	1.37006	0.000502735	0.00950292	yes	lzts2b	leucine zipper, putative tumor suppressor 2b [Source:ZFIN;Acc:ZDB-GENE-030131-9587]	-	GO:0005575//cellular_component;GO:0005622//intracellular;GO:0005623//cell;GO:0005856//cytoskeleton;GO:0043226//organelle;GO:0005737//cytoplasm;GO:0043234//protein complex;GO:0005815//microtubule organizing center	-	GO:0007165//signal transduction;GO:0008150//biological_process;GO:0006461//protein complex assembly;GO:0007010//cytoskeleton organization;GO:0007049//cell cycle;GO:0022607//cellular component assembly;GO:0065003;GO:0006810//transport;GO:0006913//nucleocytoplasmic transport;GO:0051301//cell division
ENSDARG00000068088	632	1609	202.755	523.835	1.36937	2.75286e-10	2.28557e-08	yes	tcnl	transcobalamin like [Source:ZFIN;Acc:ZDB-GENE-060531-123]	-	-	GO:0031419//cobalamin binding;GO:0003674//molecular_function	GO:0015889//cobalamin transport;GO:0009235//cobalamin metabolic process;GO:0008150//biological_process;GO:0044281//small molecule metabolic process;GO:0006810//transport
ENSDARG00000021059	1296.5	3308	88.74	229.13	1.36851	1.59632e-10	1.36895e-08	yes	alas1	aminolevulinate, delta-, synthase 1 [Source:ZFIN;Acc:ZDB-GENE-001229-2]	ko01100//Metabolic pathways;ko00260//Glycine, serine and threonine metabolism;ko00860//Porphyrin and chlorophyll metabolism	GO:0005759//mitochondrial matrix;GO:0005739//mitochondrion;GO:0005575//cellular_component;GO:0005622//intracellular;GO:0005623//cell;GO:0005737//cytoplasm;GO:0043226//organelle	GO:0030170//pyridoxal phosphate binding;GO:0003824//catalytic activity;GO:0003870//5-aminolevulinate synthase activity;GO:0016740//transferase activity;GO:0016746//transferase activity, transferring acyl groups;GO:0003674//molecular_function;GO:0043167//ion binding	GO:0006782//protoporphyrinogen IX biosynthetic process;GO:0008152//metabolic process;GO:0006783//heme biosynthetic process;GO:0009058//biosynthetic process;GO:0033014//tetrapyrrole biosynthetic process;GO:0006778//porphyrin-containing compound metabolic process;GO:0008150//biological_process;GO:0051186//cofactor metabolic process;GO:0034641//cellular nitrogen compound metabolic process
ENSDARG00000089586	13	33	0.815	2.095	1.36208	0.00207567	0.0295376	yes	ncam3	neural cell adhesion molecule 3 [Source:ZFIN;Acc:ZDB-GENE-131127-340]	-	GO:0005575//cellular_component	-	-
ENSDARG00000059227	2021.5	5056.5	1114.54	2864.57	1.36187	3.95851e-10	3.22495e-08	yes	fabp1b.1	fatty acid binding protein 1b, tandem duplicate 1 [Source:ZFIN;Acc:ZDB-GENE-050522-96]	-	GO:0005737//cytoplasm;GO:0005575//cellular_component;GO:0005622//intracellular;GO:0005623//cell	GO:0005215//transporter activity;GO:0005504//fatty acid binding;GO:0008289//lipid binding;GO:0003674//molecular_function;GO:0043167//ion binding	GO:0006810//transport;GO:0008150//biological_process
ENSDARG00000043102	262	670.5	46.35	119.09	1.36141	5.58316e-11	5.05393e-09	yes	lxn	-	-	GO:0005575//cellular_component;GO:0005575//cellular_component	GO:0003674//molecular_function;GO:0003674//molecular_function	GO:0008150//biological_process;GO:0008150//biological_process
ENSDARG00000087805	15.5	39.5	2.99	7.66	1.3572	0.00270969	0.0358041	yes	FP236735.2	-	-	-	-	-
ENSDARG00000102180	27	56.5	0.725	1.855	1.35537	0.0030381	0.0391707	yes	shroom3	-	-	-	-	-
ENSDARG00000008275	250.5	632	14.935	38.185	1.35431	5.34698e-09	3.8401e-07	yes	klhl24b	-	-	GO:0005575//cellular_component;GO:0005575//cellular_component	-	GO:2000312//regulation of kainate selective glutamate receptor activity;GO:0008150//biological_process
ENSDARG00000070511	119	298.5	5.685	14.515	1.35231	3.55629e-06	0.000141979	yes	si:dkey-183j2.10	-	-	-	-	-
ENSDARG00000043342	86	218	2.09	5.315	1.34657	5.43047e-07	2.65614e-05	yes	gpx3	glutathione peroxidase 3 [Source:ZFIN;Acc:ZDB-GENE-070222-3]	ko05016//Huntington's disease;ko05014//Amyotrophic lateral sclerosis (ALS);ko00480//Glutathione metabolism;ko00590//Arachidonic acid metabolism	-	GO:0004601//peroxidase activity;GO:0016491//oxidoreductase activity;GO:0004602//glutathione peroxidase activity;GO:0003674//molecular_function	GO:0055114//oxidation-reduction process;GO:0006979//response to oxidative stress;GO:0006950//response to stress;GO:0008150//biological_process
ENSDARG00000098438	50	125.5	5.05	12.84	1.34629	0.000299745	0.00630191	yes	SLC6A6 (2 of 2)	-	-	-	-	-
ENSDARG00000076056	51	129	7.075	17.985	1.34599	1.8394e-05	0.000596434	yes	IYD	-	-	-	-	-
ENSDARG00000077960	27.5	70	3.12	7.93	1.34577	0.00151494	0.0233006	yes	si:ch211-186e20.7	si:ch211-186e20.7 [Source:ZFIN;Acc:ZDB-GENE-110407-6]	-	-	GO:0003674//molecular_function;GO:0030234//enzyme regulator activity	-
ENSDARG00000003326	28	65.5	2.945	7.47	1.34284	0.000820358	0.014126	yes	cacng5a	calcium channel, voltage-dependent, gamma subunit 5a [Source:ZFIN;Acc:ZDB-GENE-120104-4]	ko04010//MAPK signaling pathway;ko05414//Dilated cardiomyopathy;ko04260//Cardiac muscle contraction;ko05410//Hypertrophic cardiomyopathy (HCM);ko05412//Arrhythmogenic right ventricular cardiomyopathy (ARVC)	GO:0005575//cellular_component;GO:0005575//cellular_component	GO:0003674//molecular_function;GO:0022857//transmembrane transporter activity;GO:0003674//molecular_function;GO:0022857//transmembrane transporter activity	GO:0006810//transport;GO:0008150//biological_process;GO:0055085//transmembrane transport;GO:0006810//transport;GO:0008150//biological_process;GO:0055085//transmembrane transport
ENSDARG00000073764	181	457	13	32.945	1.34155	1.19958e-08	8.27328e-07	yes	si:ch211-113j14.1	si:ch211-113j14.1 [Source:ZFIN;Acc:ZDB-GENE-120215-110]	-	-	GO:0003674//molecular_function;GO:0016491//oxidoreductase activity	GO:0008150//biological_process
ENSDARG00000104450	31.5	78.5	9.495	24.025	1.3393	0.000305949	0.00639321	yes	ATP8B3 (3 of 3)	-	-	-	-	-
ENSDARG00000077688	51	128	4.6	11.62	1.3369	8.19903e-06	0.000294826	yes	cpo	carboxypeptidase O [Source:ZFIN;Acc:ZDB-GENE-070619-6]	-	-	GO:0003674//molecular_function;GO:0008233//peptidase activity	GO:0008150//biological_process
ENSDARG00000040747	679	1701.5	63.77	160.59	1.33243	2.50297e-10	2.08474e-08	yes	tm4sf4	transmembrane 4 L six family member 4 [Source:ZFIN;Acc:ZDB-GENE-040801-231]	-	GO:0016021//integral component of membrane;GO:0005575//cellular_component	GO:0003674//molecular_function;GO:0003674//molecular_function	GO:2000227//negative regulation of pancreatic A cell differentiation;GO:0031018//endocrine pancreas development;GO:2000077//negative regulation of type B pancreatic cell development;GO:0090104//pancreatic epsilon cell differentiation;GO:0008150//biological_process;GO:0030154//cell differentiation;GO:0048856//anatomical structure development
ENSDARG00000036864	229	574	15.965	40.045	1.32671	1.34319e-07	7.56306e-06	yes	slc34a2b	-	-	-	-	-
ENSDARG00000038609	75	173	4.92	12.34	1.32661	3.13827e-05	0.00093932	yes	mpz	-	ko04514//Cell adhesion molecules (CAMs)	GO:0043209//myelin sheath;GO:0005887//integral component of plasma membrane;GO:0016020//membrane;GO:0005575//cellular_component;GO:0005623//cell;GO:0005886//plasma membrane	-	-
ENSDARG00000017165	54.5	136	1.87	4.685	1.32501	3.30327e-05	0.000981907	yes	slc3a1	-	-	-	-	-
ENSDARG00000095665	14	35	0.535	1.34	1.32462	0.00330727	0.0417533	yes	si:ch211-191a16.2	si:ch211-191a16.2 [Source:ZFIN;Acc:ZDB-GENE-081028-45]	-	-	GO:0003674//molecular_function	-
ENSDARG00000006029	583	1494.5	59.89	149.67	1.3214	4.62803e-11	4.29369e-09	yes	lta4h	leukotriene A4 hydrolase [Source:ZFIN;Acc:ZDB-GENE-040426-2477]	ko01100//Metabolic pathways;ko00590//Arachidonic acid metabolism	GO:0005737//cytoplasm;GO:0005575//cellular_component;GO:0005622//intracellular;GO:0005623//cell	GO:0046872//metal ion binding;GO:0008233//peptidase activity;GO:0004463//leukotriene-A4 hydrolase activity;GO:0008237//metallopeptidase activity;GO:0008270//zinc ion binding;GO:0016787//hydrolase activity;GO:0003674//molecular_function;GO:0043167//ion binding	GO:0006954//inflammatory response;GO:0006508//proteolysis;GO:0019370//leukotriene biosynthetic process;GO:0006629//lipid metabolic process;GO:0008150//biological_process;GO:0009058//biosynthetic process;GO:0044281//small molecule metabolic process;GO:0006950//response to stress
ENSDARG00000058445	65	162	5.5	13.735	1.32035	9.38271e-06	0.000329659	yes	PDILT	protein disulfide isomerase-like, testis expressed [Source:HGNC Symbol;Acc:HGNC:27338]	-	GO:0005783//endoplasmic reticulum;GO:0005575//cellular_component;GO:0005622//intracellular;GO:0005623//cell;GO:0005737//cytoplasm;GO:0005783//endoplasmic reticulum;GO:0043226//organelle	GO:0031545//peptidyl-proline 4-dioxygenase activity;GO:0003756//protein disulfide isomerase activity;GO:0003674//molecular_function;GO:0016853//isomerase activity;GO:0016491//oxidoreductase activity	GO:0034976//response to endoplasmic reticulum stress;GO:0006457//protein folding;GO:0045454//cell redox homeostasis;GO:0008150//biological_process;GO:0042592//homeostatic process;GO:0006457//protein folding;GO:0006950//response to stress
ENSDARG00000074556	42.5	94.5	1.815	4.525	1.31795	0.000343905	0.00705981	yes	ganc	glucosidase, alpha; neutral C [Source:ZFIN;Acc:ZDB-GENE-130530-754]	ko01100//Metabolic pathways;ko00500//Starch and sucrose metabolism;ko00052//Galactose metabolism	-	GO:0003674//molecular_function;GO:0016798//hydrolase activity, acting on glycosyl bonds	GO:0008150//biological_process;GO:0005975//carbohydrate metabolic process
ENSDARG00000011929	93.5	231.5	7.72	19.215	1.31556	4.75293e-07	2.38286e-05	yes	plp1b	proteolipid protein 1b [Source:ZFIN;Acc:ZDB-GENE-030710-6]	-	GO:0016021//integral component of membrane;GO:0005575//cellular_component	-	-
ENSDARG00000075727	39.5	96.5	12.83	31.92	1.31494	4.31027e-05	0.00123211	yes	CR847510.1	-	-	-	-	-
ENSDARG00000002249	104	257	6.57	16.31	1.31179	1.45246e-07	8.09096e-06	yes	tbxas1	-	ko01100//Metabolic pathways;ko00590//Arachidonic acid metabolism	-	GO:0016491//oxidoreductase activity;GO:0004497//monooxygenase activity;GO:0016705//oxidoreductase activity, acting on paired donors, with incorporation or reduction of molecular oxygen;GO:0020037//heme binding;GO:0046872//metal ion binding;GO:0005506//iron ion binding;GO:0003674//molecular_function;GO:0043167//ion binding;GO:0016491//oxidoreductase activity;GO:0004497//monooxygenase activity;GO:0…	GO:0055114//oxidation-reduction process;GO:0008150//biological_process;GO:0055114//oxidation-reduction process;GO:0008150//biological_process
XLOC_009110	21	51.5	2.13	5.26	1.30421	0.000531062	0.00992458	yes	TCONS_00022684	PREDICTED: CBL-interacting serine/threonine-protein kinase 25-like [Danio rerio]	ko04020//Calcium signaling pathway;ko04270//Vascular smooth muscle contraction;ko04810//Regulation of actin cytoskeleton;ko04510//Focal adhesion;ko04971//Gastric acid secretion	-	GO:0016740//transferase activity	-
ENSDARG00000016868	30.5	76.5	1.665	4.095	1.29834	0.000674198	0.0120468	yes	rhobtb2a	-	ko04120//Ubiquitin mediated proteolysis	-	-	-
ENSDARG00000060756	22	53.5	3.565	8.75	1.29538	0.000541239	0.0100787	yes	abhd6a	-	-	-	-	-
ENSDARG00000077982	101	240.5	8.725	21.365	1.29202	7.93891e-07	3.75622e-05	yes	elf3	-	-	GO:0005575//cellular_component;GO:0005622//intracellular;GO:0005623//cell;GO:0005634//nucleus;GO:0043226//organelle	GO:0003674//molecular_function;GO:0003677//DNA binding;GO:0001071//nucleic acid binding transcription factor activity	GO:0008150//biological_process;GO:0030154//cell differentiation
ENSDARG00000025375	1125.5	2739	78.86	193.075	1.2918	1.20951e-11	1.18988e-09	yes	idh1	isocitrate dehydrogenase 1 (NADP+), soluble [Source:ZFIN;Acc:ZDB-GENE-031006-1]	ko01100//Metabolic pathways;ko04146//Peroxisome;ko00480//Glutathione metabolism;ko00020//Citrate cycle (TCA cycle)	-	GO:0016491//oxidoreductase activity;GO:0000287//magnesium ion binding;GO:0046872//metal ion binding;GO:0016616//oxidoreductase activity, acting on the CH-OH group of donors, NAD or NADP as acceptor;GO:0051287//NAD binding;GO:0004450//isocitrate dehydrogenase (NADP+) activity;GO:0003674//molecular_function;GO:0043167//ion binding	GO:0006099//tricarboxylic acid cycle;GO:0055114//oxidation-reduction process;GO:0006102//isocitrate metabolic process;GO:0008150//biological_process;GO:0044281//small molecule metabolic process;GO:0006091//generation of precursor metabolites and energy
ENSDARG00000086740	340.5	829	14.96	36.585	1.29014	1.34719e-08	9.24241e-07	yes	phyh	phytanoyl-CoA 2-hydroxylase [Source:ZFIN;Acc:ZDB-GENE-050417-361]	ko04146//Peroxisome	GO:0005575//cellular_component;GO:0005575//cellular_component	GO:0003674//molecular_function;GO:0003674//molecular_function	GO:0008150//biological_process;GO:0008150//biological_process
ENSDARG00000105114	32.5	79	1.72	4.205	1.2897	0.000251237	0.00545693	yes	crebrf	-	-	-	-	-
ENSDARG00000071036	133	323.5	25.385	62.005	1.28841	1.01571e-07	5.85832e-06	yes	si:dkey-286j15.3	-	-	-	-	-
ENSDARG00000055416	502	1216	51.03	124.635	1.28829	3.47959e-11	3.26306e-09	yes	serpinb1	serpin peptidase inhibitor, clade B (ovalbumin), member 1 [Source:ZFIN;Acc:ZDB-GENE-040718-400]	-	GO:0005615//extracellular space;GO:0005575//cellular_component;GO:0005576//extracellular region;GO:0005615//extracellular space	GO:0004867//serine-type endopeptidase inhibitor activity;GO:0003674//molecular_function;GO:0030234//enzyme regulator activity	-
ENSDARG00000055510	133.5	325	17.145	41.81	1.28606	2.54932e-06	0.000106167	yes	ypel3	yippee-like 3 [Source:ZFIN;Acc:ZDB-GENE-030516-4]	-	GO:0005575//cellular_component;GO:0005622//intracellular;GO:0005623//cell;GO:0005634//nucleus;GO:0043226//organelle;GO:0005575//cellular_component;GO:0005622//intracellular;GO:0005623//cell;GO:0005634//nucleus;GO:0043226//organelle	-	GO:0008150//biological_process;GO:0008219//cell death;GO:0048856//anatomical structure development;GO:0008150//biological_process;GO:0008219//cell death;GO:0048856//anatomical structure development
ENSDARG00000020212	199.5	464	11.785	28.635	1.28083	1.68885e-07	9.32801e-06	yes	slc1a1	-	-	-	-	-
ENSDARG00000036863	181	440	3.37	8.165	1.2767	2.36039e-06	9.89315e-05	yes	MYO1D	myosin ID [Source:HGNC Symbol;Acc:HGNC:7598]	-	-	GO:0003674//molecular_function;GO:0043167//ion binding	-
ENSDARG00000101645	70	168.5	4.59	11.11	1.27529	3.50381e-06	0.000140314	yes	MYRFL	-	-	-	-	-
ENSDARG00000098296	74	176.5	5.325	12.88	1.27428	1.0886e-05	0.0003749	yes	gnsb	-	-	-	-	-
ENSDARG00000006526	2600.5	6263.5	59.055	142.665	1.2725	2.02336e-11	1.95837e-09	yes	fn1b	fibronectin 1b [Source:ZFIN;Acc:ZDB-GENE-030131-6545]	-	GO:0005576//extracellular region;GO:0005575//cellular_component	-	GO:0001756//somitogenesis;GO:0003128//heart field specification;GO:0008150//biological_process;GO:0048646//anatomical structure formation involved in morphogenesis;GO:0048856//anatomical structure development;GO:0009790//embryo development
ENSDARG00000074628	21	51.5	1.545	3.73	1.27157	0.00281744	0.0369404	yes	si:dkey-10o6.2	-	-	-	GO:0016491//oxidoreductase activity;GO:0016706//oxidoreductase activity, acting on paired donors, with incorporation or reduction of molecular oxygen, 2-oxoglutarate as one donor, and incorporation of one atom each of oxygen into both donors;GO:0005506//iron ion binding;GO:0046872//metal ion binding;GO:0003674//molecular_function;GO:0043167//ion binding	GO:0055114//oxidation-reduction process;GO:0008150//biological_process
ENSDARG00000087197	24	57.5	0.755	1.82	1.26939	0.00226561	0.0314507	yes	ros1	-	-	-	-	-
ENSDARG00000076241	256.5	609.5	20.08	48.285	1.26582	1.27264e-08	8.75404e-07	yes	txlnbb	-	-	GO:0005575//cellular_component;GO:0005575//cellular_component	GO:0019905//syntaxin binding;GO:0003674//molecular_function	GO:0008150//biological_process;GO:0008150//biological_process
XLOC_001984	23.5	56	3.105	7.46	1.26458	0.000721307	0.0127212	yes	TCONS_00005168	PREDICTED: unconventional myosin-XVIIIb-like, partial [Danio rerio]	-	-	-	-
ENSDARG00000056874	32.5	77	7.73	18.525	1.26093	0.000281221	0.00600937	yes	lygl1	lysozyme g-like 1 [Source:ZFIN;Acc:ZDB-GENE-040718-461]	-	GO:0005575//cellular_component;GO:0005575//cellular_component	GO:0003796//lysozyme activity;GO:0003674//molecular_function;GO:0016798//hydrolase activity, acting on glycosyl bonds	GO:0009253//peptidoglycan catabolic process;GO:0016998//cell wall macromolecule catabolic process;GO:0008150//biological_process;GO:0009056//catabolic process;GO:0071554//cell wall organization or biogenesis
ENSDARG00000037495	18	42.5	0.965	2.305	1.25617	0.00210377	0.0297934	yes	rtn4rl2b	-	-	-	GO:0005515//protein binding;GO:0003674//molecular_function	-
ENSDARG00000078130	92.5	273	6.1	14.565	1.25562	9.01104e-09	6.36633e-07	yes	zgc:193593	-	-	-	-	-
ENSDARG00000039832	318	755	49.49	118.005	1.25364	5.46645e-08	3.34531e-06	yes	zgc:173961	zgc:173961 [Source:ZFIN;Acc:ZDB-GENE-070822-30]	ko05200//Pathways in cancer;ko05215//Prostate cancer;ko00480//Glutathione metabolism;ko00980//Metabolism of xenobiotics by cytochrome P450;ko00982//Drug metabolism - cytochrome P450	GO:0005575//cellular_component;GO:0005575//cellular_component;GO:0005575//cellular_component;GO:0005575//cellular_component;GO:0005575//cellular_component;GO:0005575//cellular_component;GO:0005575//cellular_component;GO:0005575//cellular_component	GO:0004364//glutathione transferase activity;GO:0016740//transferase activity;GO:0003674//molecular_function;GO:0016765//transferase activity, transferring alkyl or aryl (other than methyl) groups;GO:0004364//glutathione transferase activity;GO:0016740//transferase activity;GO:0003674//molecular_function;GO:0016765//transferase activity, transferring alkyl or aryl (other than methyl) groups;GO:00…	GO:0008152//metabolic process;GO:0008150//biological_process;GO:0008152//metabolic process;GO:0008150//biological_process;GO:0008152//metabolic process;GO:0008150//biological_process;GO:0008152//metabolic process;GO:0008150//biological_process
ENSDARG00000092813	112.5	272	5.765	13.73	1.25194	1.30266e-06	5.85294e-05	yes	fndc7rs4	-	-	-	-	-
ENSDARG00000091584	58.5	136	4.5	10.715	1.25163	2.27997e-05	0.000718728	yes	APOH	-	-	-	-	-
ENSDARG00000096809	23	54	0.74	1.76	1.24998	0.00111344	0.0181847	yes	si:ch211-168b3.2	-	-	-	-	-
ENSDARG00000029476	191.5	455	6.125	14.525	1.24576	1.72088e-07	9.46483e-06	yes	ldlra	low density lipoprotein receptor a [Source:ZFIN;Acc:ZDB-GENE-031217-1]	ko04144//Endocytosis;ko05160//Hepatitis C;ko05145//Toxoplasmosis;ko04976//Bile secretion	GO:0016020//membrane;GO:0016021//integral component of membrane;GO:0005575//cellular_component	GO:0005509//calcium ion binding;GO:0003674//molecular_function;GO:0043167//ion binding	GO:0090118//receptor-mediated endocytosis of low-density lipoprotein particle involved in cholesterol transport;GO:0006810//transport;GO:0008150//biological_process;GO:0016192//vesicle-mediated transport
ENSDARG00000019492	106	249	9.8	23.13	1.23891	5.45638e-06	0.000208269	yes	shbg	sex hormone-binding globulin [Source:ZFIN;Acc:ZDB-GENE-030131-1324]	-	-	GO:0005496//steroid binding;GO:0005497//androgen binding;GO:0003674//molecular_function;GO:0008289//lipid binding	-
ENSDARG00000100660	30.5	69.5	1.325	3.115	1.23324	0.000581586	0.0107152	yes	PARP12 (2 of 2)	-	-	-	-	-
ENSDARG00000079560	46.5	96	1.175	2.76	1.23201	0.00212006	0.0299242	yes	ptprh	-	-	-	-	-
ENSDARG00000070272	18.5	47.5	2.28	5.35	1.23051	0.000667887	0.0119587	yes	casp8l2	-	ko05200//Pathways in cancer;ko05010//Alzheimer's disease;ko05016//Huntington's disease;ko05152//Tuberculosis;ko05145//Toxoplasmosis;ko05142//Chagas disease (American trypanosomiasis);ko04210//Apoptosis;ko04620//Toll-like receptor signaling pathway;ko04115//p53 signaling pathway;ko04622//RIG-I-like receptor signaling pathway;ko05416//Viral myocarditis;ko04621//NOD-like receptor signaling pathway	-	-	-
ENSDARG00000090930	41	94.5	4.625	10.84	1.22884	0.000262333	0.0056633	yes	si:ch211-120g10.1	-	-	-	-	-
ENSDARG00000091561	14.5	34	0.585	1.37	1.22767	0.0040839	0.0486819	yes	si:dkey-156k2.4	-	-	-	-	-
ENSDARG00000079483	44	102	1.985	4.645	1.22654	0.00072333	0.0127328	yes	CLIP1 (2 of 2)	-	-	-	-	-
ENSDARG00000042332	40.5	100	3.615	8.44	1.22325	0.00267201	0.0353959	yes	plin2	-	-	GO:0005575//cellular_component;GO:0005575//cellular_component	GO:0003674//molecular_function;GO:0003674//molecular_function	GO:0008150//biological_process;GO:0008150//biological_process
XLOC_025642	23.5	55	1.08	2.52	1.22239	0.00127644	0.020303	yes	TCONS_00060830	PREDICTED: uncharacterized protein LOC101884903 [Danio rerio]	ko04144//Endocytosis;ko04976//Bile secretion;ko05145//Toxoplasmosis;ko05160//Hepatitis C	-	-	-
ENSDARG00000101695	85.5	177	1.705	3.97	1.21937	0.000305067	0.00638803	yes	si:dkey-26m3.3	-	-	-	-	-
ENSDARG00000008263	20	46.5	1.42	3.305	1.21876	0.00243272	0.0331717	yes	mfsd4b	-	-	-	-	-
XLOC_001962	26.5	61.5	2.89	6.72	1.21739	0.00191026	0.027863	yes	TCONS_00005117	PREDICTED: unconventional myosin-XVIIIb-like, partial [Danio rerio]	-	-	-	-
ENSDARG00000004724	36.5	83	3.9	9.06	1.21604	0.00216131	0.0303913	yes	tcea3	-	-	GO:0005634//nucleus;GO:0005575//cellular_component;GO:0005622//intracellular;GO:0005623//cell;GO:0043226//organelle	GO:0003676//nucleic acid binding;GO:0008270//zinc ion binding;GO:0003746//translation elongation factor activity;GO:0003677//DNA binding;GO:0003674//molecular_function;GO:0003723//RNA binding;GO:0008135//translation factor activity, nucleic acid binding;GO:0043167//ion binding	GO:0006414//translational elongation;GO:0006351//transcription, DNA-templated;GO:0006355//regulation of transcription, DNA-templated;GO:0032784//regulation of DNA-templated transcription, elongation;GO:0006357//regulation of transcription from RNA polymerase II promoter;GO:0006412//translation;GO:0008150//biological_process;GO:0009058//biosynthetic process;GO:0034641//cellular nitrogen compound m…
ENSDARG00000013056	153.5	356	9.435	21.905	1.21517	5.25987e-07	2.60421e-05	yes	itpk1a	inositol-tetrakisphosphate 1-kinase a [Source:ZFIN;Acc:ZDB-GENE-040426-1953]	ko01100//Metabolic pathways;ko04070//Phosphatidylinositol signaling system;ko00562//Inositol phosphate metabolism	GO:0005575//cellular_component;GO:0005622//intracellular;GO:0005623//cell	GO:0003674//molecular_function;GO:0016301//kinase activity;GO:0043167//ion binding;GO:0016853//isomerase activity	GO:0008150//biological_process;GO:0044281//small molecule metabolic process
ENSDARG00000014232	43.5	102	2.66	6.175	1.21501	0.000366961	0.00742754	yes	si:dkey-121j17.5	-	-	-	-	-
ENSDARG00000052376	37.5	99.5	1.285	2.98	1.21354	1.52383e-05	0.00050478	yes	b3gnt2a	UDP-GlcNAc:betaGal beta-1,3-N-acetylglucosaminyltransferase 2a [Source:ZFIN;Acc:ZDB-GENE-090312-192]	-	GO:0016021//integral component of membrane;GO:0005794//Golgi apparatus;GO:0016020//membrane;GO:0005575//cellular_component;GO:0005622//intracellular;GO:0005623//cell;GO:0005737//cytoplasm;GO:0043226//organelle	GO:0016757//transferase activity, transferring glycosyl groups;GO:0008378//galactosyltransferase activity;GO:0016740//transferase activity;GO:0003674//molecular_function	GO:0006486//protein glycosylation;GO:0005975//carbohydrate metabolic process;GO:0006464//cellular protein modification process;GO:0008150//biological_process;GO:0009058//biosynthetic process
ENSDARG00000060622	55.5	128	2.54	5.875	1.20976	4.17843e-05	0.00120049	yes	si:ch73-14h1.2	-	-	-	-	-
ENSDARG00000070775	94	216	8.225	18.99	1.20715	3.61308e-06	0.000143368	yes	cyp2x9	cytochrome P450, family 2, subfamily X, polypeptide 9 [Source:ZFIN;Acc:ZDB-GENE-061027-109]	-	GO:0005737//cytoplasm;GO:0043231//intracellular membrane-bounded organelle;GO:0005575//cellular_component;GO:0005622//intracellular;GO:0005623//cell;GO:0043226//organelle;GO:0005737//cytoplasm	GO:0016491//oxidoreductase activity;GO:0004497//monooxygenase activity;GO:0020037//heme binding;GO:0016705//oxidoreductase activity, acting on paired donors, with incorporation or reduction of molecular oxygen;GO:0005506//iron ion binding;GO:0046872//metal ion binding;GO:0008395//steroid hydroxylase activity;GO:0019825//oxygen binding;GO:0016712//oxidoreductase activity, acting on paired donors, …	GO:0042738//exogenous drug catabolic process;GO:0006805//xenobiotic metabolic process;GO:0055114//oxidation-reduction process;GO:0006082//organic acid metabolic process;GO:0008150//biological_process;GO:0044281//small molecule metabolic process;GO:0009056//catabolic process
ENSDARG00000035732	115	247.5	7.9	18.22	1.2056	1.45163e-05	0.000482088	yes	arntl1b	aryl hydrocarbon receptor nuclear translocator-like 1b [Source:ZFIN;Acc:ZDB-GENE-030408-1]	ko04710//Circadian rhythm - mammal;ko04711//Circadian rhythm - fly	GO:0005667//transcription factor complex;GO:0005634//nucleus;GO:0005737//cytoplasm;GO:0005575//cellular_component;GO:0005622//intracellular;GO:0005623//cell;GO:0043226//organelle;GO:0043234//protein complex	GO:0046983//protein dimerization activity;GO:0003677//DNA binding;GO:0005515//protein binding;GO:0003700//sequence-specific DNA binding transcription factor activity;GO:0004871//signal transducer activity;GO:0003674//molecular_function;GO:0001071//nucleic acid binding transcription factor activity;GO:0003677//DNA binding	GO:0006355//regulation of transcription, DNA-templated;GO:0009648//photoperiodism;GO:0006351//transcription, DNA-templated;GO:0007165//signal transduction;GO:0008150//biological_process;GO:0009058//biosynthetic process;GO:0034641//cellular nitrogen compound metabolic process
ENSDARG00000042124	122	257.5	12.99	29.895	1.2025	6.66909e-06	0.000246265	yes	si:dkey-4e7.3	-	-	GO:0005829//cytosol;GO:0005575//cellular_component;GO:0005622//intracellular;GO:0005623//cell;GO:0005737//cytoplasm;GO:0005829//cytosol	GO:0008477//purine nucleosidase activity;GO:0003674//molecular_function;GO:0016798//hydrolase activity, acting on glycosyl bonds	GO:0006152//purine nucleoside catabolic process;GO:0008150//biological_process;GO:0009056//catabolic process;GO:0034641//cellular nitrogen compound metabolic process;GO:0034655;GO:0044281//small molecule metabolic process
ENSDARG00000097725	26.5	60.5	6.575	15.115	1.20092	0.00266161	0.035294	yes	si:dkey-96g2.1	-	-	-	-	-
ENSDARG00000102414	1075	2428.5	22.745	52.22	1.19905	1.54208e-06	6.77942e-05	yes	wu:fd14a01	wu:fd14a01 [Source:ZFIN;Acc:ZDB-GENE-030131-5336]	ko04810//Regulation of actin cytoskeleton;ko04530//Tight junction;ko04270//Vascular smooth muscle contraction;ko05414//Dilated cardiomyopathy;ko04260//Cardiac muscle contraction;ko05410//Hypertrophic cardiomyopathy (HCM);ko05416//Viral myocarditis	GO:0016459//myosin complex;GO:0005575//cellular_component;GO:0005622//intracellular;GO:0005623//cell;GO:0005856//cytoskeleton;GO:0043226//organelle;GO:0043234//protein complex;GO:0016459//myosin complex;GO:0005575//cellular_component;GO:0005622//intracellular;GO:0005623//cell;GO:0005856//cytoskeleton;GO:0043226//organelle;GO:0043234//protein complex	GO:0003779//actin binding;GO:0003774//motor activity;GO:0005524//ATP binding;GO:0000166//nucleotide binding;GO:0003674//molecular_function;GO:0043167//ion binding;GO:0008092//cytoskeletal protein binding;GO:0003779//actin binding;GO:0003774//motor activity;GO:0005524//ATP binding;GO:0000166//nucleotide binding;GO:0003674//molecular_function;GO:0043167//ion binding;GO:0008092//cytoskeletal protein…	-
ENSDARG00000017884	32.5	73.5	2.695	6.175	1.19615	0.000511064	0.0096198	yes	bgna	biglycan a [Source:ZFIN;Acc:ZDB-GENE-040704-74]	-	-	-	GO:0008150//biological_process;GO:0008150//biological_process
ENSDARG00000013858	19.5	44.5	1.025	2.345	1.19396	0.00255598	0.0343476	yes	cdc14aa	cell division cycle 14Aa [Source:ZFIN;Acc:ZDB-GENE-040426-1214]	ko04110//Cell cycle	GO:0005819//spindle;GO:0005813//centrosome;GO:0000922//spindle pole;GO:0005575//cellular_component;GO:0005622//intracellular;GO:0005623//cell;GO:0005856//cytoskeleton;GO:0043226//organelle;GO:0005815//microtubule organizing center	GO:0004721//phosphoprotein phosphatase activity;GO:0008138//protein tyrosine/serine/threonine phosphatase activity;GO:0016791//phosphatase activity;GO:0004725//protein tyrosine phosphatase activity;GO:0016787//hydrolase activity;GO:0003674//molecular_function	GO:0042384//cilium assembly;GO:0051301//cell division;GO:0016311//dephosphorylation;GO:0006470//protein dephosphorylation;GO:0007049//cell cycle;GO:0007096//regulation of exit from mitosis;GO:0008150//biological_process;GO:0006464//cellular protein modification process;GO:0000902//cell morphogenesis;GO:0022607//cellular component assembly;GO:0048646//anatomical structure formation involved in mor…
ENSDARG00000079347	36.5	82.5	5.25	12	1.19265	0.000803059	0.0138831	yes	zgc:194659	zgc:194659 [Source:ZFIN;Acc:ZDB-GENE-081022-139]	-	GO:0005575//cellular_component	-	GO:0008150//biological_process
ENSDARG00000103498	809	1814.5	159.16	361.64	1.18408	9.93575e-10	7.80196e-08	yes	epd	ependymin [Source:ZFIN;Acc:ZDB-GENE-980526-111]	-	GO:0005576//extracellular region;GO:0005575//cellular_component	GO:0005509//calcium ion binding;GO:0003674//molecular_function;GO:0043167//ion binding	GO:0007160//cell-matrix adhesion;GO:0007155//cell adhesion;GO:0008150//biological_process
ENSDARG00000053293	21	47	1.135	2.57	1.17908	0.0029209	0.0380169	yes	ftr14	finTRIM family, member 14 [Source:ZFIN;Acc:ZDB-GENE-060512-201]	-	GO:0005622//intracellular;GO:0005575//cellular_component;GO:0005623//cell	GO:0008270//zinc ion binding;GO:0046872//metal ion binding;GO:0003674//molecular_function;GO:0043167//ion binding	GO:0035556//intracellular signal transduction;GO:0007165//signal transduction;GO:0008150//biological_process
ENSDARG00000061222	24	54	0.91	2.055	1.1752	0.00142114	0.0222116	yes	uba7	ubiquitin-like modifier activating enzyme 7 [Source:ZFIN;Acc:ZDB-GENE-121120-4]	ko04120//Ubiquitin mediated proteolysis;ko05012//Parkinson's disease	GO:0005575//cellular_component;GO:0005622//intracellular;GO:0005623//cell;GO:0005737//cytoplasm;GO:0005829//cytosol;GO:0005634//nucleus;GO:0043226//organelle	GO:0003674//molecular_function;GO:0016874//ligase activity;GO:0043167//ion binding	GO:0006464//cellular protein modification process;GO:0008150//biological_process
ENSDARG00000036186	245.5	533.5	42.51	95.965	1.17471	9.68184e-08	5.6215e-06	yes	mbpa	myelin basic protein a [Source:ZFIN;Acc:ZDB-GENE-030128-2]	-	GO:0005575//cellular_component;GO:0005623//cell	GO:0003674//molecular_function;GO:0005198//structural molecule activity	-
ENSDARG00000008880	119.5	270	3.975	8.96	1.17254	2.52217e-05	0.000781611	yes	usp28	ubiquitin specific peptidase 28 [Source:ZFIN;Acc:ZDB-GENE-041008-142]	-	GO:0005575//cellular_component;GO:0005622//intracellular;GO:0005623//cell;GO:0005634//nucleus;GO:0043226//organelle	GO:0003674//molecular_function;GO:0008233//peptidase activity;GO:0003674//molecular_function;GO:0005515//protein binding	GO:0008150//biological_process;GO:0009056//catabolic process;GO:0006464//cellular protein modification process;GO:0006950//response to stress;GO:0007049//cell cycle;GO:0048856//anatomical structure development;GO:0006511//ubiquitin-dependent protein catabolic process;GO:0008150//biological_process;GO:0009056//catabolic process
ENSDARG00000056762	134.5	300.5	13.77	30.945	1.16818	1.30664e-06	5.85294e-05	yes	zgc:172079	zgc:172079 [Source:ZFIN;Acc:ZDB-GENE-080204-103]	-	GO:0016020//membrane;GO:0016021//integral component of membrane;GO:0005575//cellular_component	GO:0004930//G-protein coupled receptor activity;GO:0004871//signal transducer activity;GO:0003674//molecular_function	GO:0007186//G-protein coupled receptor signaling pathway;GO:0007165//signal transduction;GO:0008150//biological_process
ENSDARG00000102805	125	300	10.375	23.275	1.16567	5.44832e-05	0.00149987	yes	cyp2aa12	cytochrome P450, family 2, subfamily AA, polypeptide 12 [Source:ZFIN;Acc:ZDB-GENE-071004-47]	-	GO:0043231//intracellular membrane-bounded organelle;GO:0005737//cytoplasm;GO:0005575//cellular_component;GO:0005622//intracellular;GO:0005623//cell;GO:0005737//cytoplasm;GO:0043226//organelle	GO:0016491//oxidoreductase activity;GO:0004497//monooxygenase activity;GO:0016705//oxidoreductase activity, acting on paired donors, with incorporation or reduction of molecular oxygen;GO:0020037//heme binding;GO:0005506//iron ion binding;GO:0046872//metal ion binding;GO:0016712//oxidoreductase activity, acting on paired donors, with incorporation or reduction of molecular oxygen, reduced flavin …	GO:0006805//xenobiotic metabolic process;GO:0055114//oxidation-reduction process;GO:0042738//exogenous drug catabolic process;GO:0019369//arachidonic acid metabolic process;GO:0006629//lipid metabolic process;GO:0008150//biological_process;GO:0044281//small molecule metabolic process;GO:0009056//catabolic process
ENSDARG00000067566	28	62	2.16	4.845	1.16547	0.00177409	0.0262486	yes	sftpbb	surfactant protein Bb [Source:ZFIN;Acc:ZDB-GENE-060526-155]	-	GO:0005764//lysosome;GO:0005575//cellular_component;GO:0005622//intracellular;GO:0005623//cell;GO:0005737//cytoplasm;GO:0005773//vacuole;GO:0043226//organelle	GO:0046872//metal ion binding;GO:0003674//molecular_function;GO:0043167//ion binding	GO:0006665//sphingolipid metabolic process;GO:0006629//lipid metabolic process;GO:0008150//biological_process
ENSDARG00000075292	56	126	0.535	1.2	1.16542	0.000111234	0.00273573	yes	myo15aa	myosin XVAa [Source:ZFIN;Acc:ZDB-GENE-080425-2]	-	GO:0005575//cellular_component;GO:0005622//intracellular;GO:0005623//cell;GO:0005856//cytoskeleton;GO:0043226//organelle;GO:0043234//protein complex	GO:0003674//molecular_function;GO:0043167//ion binding	-
ENSDARG00000103503	182	406	8.91	19.97	1.16434	9.92029e-08	5.74715e-06	yes	dgat1a	diacylglycerol O-acyltransferase 1a [Source:ZFIN;Acc:ZDB-GENE-030131-4600]	ko01100//Metabolic pathways;ko00561//Glycerolipid metabolism;ko04975//Fat digestion and absorption;ko00830//Retinol metabolism	GO:0016020//membrane;GO:0005789//endoplasmic reticulum membrane;GO:0016021//integral component of membrane;GO:0005783//endoplasmic reticulum;GO:0005575//cellular_component;GO:0005622//intracellular;GO:0005623//cell;GO:0005737//cytoplasm;GO:0043226//organelle	GO:0016740//transferase activity;GO:0008374//O-acyltransferase activity;GO:0004144//diacylglycerol O-acyltransferase activity;GO:0016746//transferase activity, transferring acyl groups;GO:0003674//molecular_function	GO:0019432//triglyceride biosynthetic process;GO:0006629//lipid metabolic process;GO:0008150//biological_process;GO:0009058//biosynthetic process
XLOC_008525	19.5	43	3.795	8.495	1.16251	0.00394611	0.0474516	yes	TCONS_00021181	PREDICTED: pleckstrin homology-like domain family B member 1-like [Danio rerio]	-	-	-	-
ENSDARG00000099351	122	258	13.19	29.52	1.16225	2.04114e-05	0.000652914	yes	igfbp1a	insulin-like growth factor binding protein 1a [Source:ZFIN;Acc:ZDB-GENE-021231-1]	-	GO:0005737//cytoplasm;GO:0005576//extracellular region;GO:0005615//extracellular space;GO:0005575//cellular_component;GO:0005615//extracellular space;GO:0005622//intracellular;GO:0005623//cell;GO:0005737//cytoplasm	GO:0031994//insulin-like growth factor I binding;GO:0031995//insulin-like growth factor II binding;GO:0005520//insulin-like growth factor binding;GO:0003674//molecular_function	GO:0001666//response to hypoxia;GO:0001558//regulation of cell growth;GO:0008285//negative regulation of cell proliferation;GO:0043567//regulation of insulin-like growth factor receptor signaling pathway;GO:0008150//biological_process;GO:0006950//response to stress
ENSDARG00000098096	33	72.5	2.185	4.885	1.16073	0.00107188	0.0175969	yes	SLC12A1	-	-	-	-	-
ENSDARG00000101557	99	239.5	8.325	18.595	1.15939	3.04142e-07	1.59537e-05	yes	scarb1	scavenger receptor class B, member 1 [Source:ZFIN;Acc:ZDB-GENE-031126-1]	ko04145//Phagosome;ko05160//Hepatitis C;ko04976//Bile secretion;ko04975//Fat digestion and absorption;ko04977//Vitamin digestion and absorption	GO:0016020//membrane;GO:0016021//integral component of membrane;GO:0005575//cellular_component	-	GO:0007155//cell adhesion;GO:0008150//biological_process
ENSDARG00000058476	37.5	83	4.36	9.73	1.15811	0.000609035	0.0111032	yes	stc1l	stanniocalcin 1, like [Source:ZFIN;Acc:ZDB-GENE-040426-1521]	-	GO:0005576//extracellular region;GO:0005575//cellular_component	GO:0005179//hormone activity;GO:0003674//molecular_function	GO:0051592//response to calcium ion;GO:0045892//negative regulation of transcription, DNA-templated;GO:0006874//cellular calcium ion homeostasis;GO:0008150//biological_process;GO:0042592//homeostatic process
ENSDARG00000042899	41.5	101	2.205	4.92	1.15788	0.000318061	0.00657562	yes	si:ch211-163l21.8	-	-	-	-	-
XLOC_010312	115.5	223.5	71.79	160.085	1.15698	0.000147891	0.00353718	yes	TCONS_00025599	PREDICTED: intron-binding protein aquarius, partial [Ornithorhynchus anatinus]	-	-	-	-
ENSDARG00000003931	454	1006	29.72	66.235	1.15616	1.16877e-07	6.63829e-06	yes	cndp2	CNDP dipeptidase 2 (metallopeptidase M20 family) [Source:ZFIN;Acc:ZDB-GENE-030131-5499]	ko01100//Metabolic pathways;ko00330//Arginine and proline metabolism;ko00410//beta-Alanine metabolism;ko00340//Histidine metabolism	GO:0005575//cellular_component;GO:0005575//cellular_component;GO:0005575//cellular_component;GO:0005575//cellular_component	GO:0016805//dipeptidase activity;GO:0034701//tripeptidase activity;GO:0008237//metallopeptidase activity;GO:0016787//hydrolase activity;GO:0003674//molecular_function;GO:0008233//peptidase activity;GO:0016805//dipeptidase activity;GO:0034701//tripeptidase activity;GO:0008237//metallopeptidase activity;GO:0016787//hydrolase activity;GO:0003674//molecular_function;GO:0008233//peptidase activity	GO:0008152//metabolic process;GO:0006508//proteolysis;GO:0008150//biological_process;GO:0008152//metabolic process;GO:0006508//proteolysis;GO:0008150//biological_process
ENSDARG00000046142	22.5	55.5	3.38	7.53	1.15563	0.00191276	0.0278734	yes	si:ch211-170d8.5	-	-	-	-	-
ENSDARG00000100406	978	2145	51.265	114.14	1.15476	1.0405e-07	5.97483e-06	yes	ITIH4 (1 of 2)	-	-	GO:0005575//cellular_component;GO:0005575//cellular_component	GO:0003674//molecular_function;GO:0003674//molecular_function	GO:0008150//biological_process;GO:0008150//biological_process
ENSDARG00000070038	1333.5	2922	412.21	915.37	1.15098	5.38044e-07	2.64158e-05	yes	rbp2a	retinol binding protein 2a, cellular [Source:ZFIN;Acc:ZDB-GENE-020320-2]	-	-	GO:0005215//transporter activity;GO:0008289//lipid binding;GO:0003674//molecular_function	GO:0006810//transport;GO:0008150//biological_process
ENSDARG00000062132	187.5	387	12.885	28.595	1.15007	5.95773e-06	0.000225099	yes	cyp4v8	cytochrome P450, family 4, subfamily V, polypeptide 8 [Source:ZFIN;Acc:ZDB-GENE-061103-601]	-	GO:0005575//cellular_component;GO:0005575//cellular_component	GO:0016705//oxidoreductase activity, acting on paired donors, with incorporation or reduction of molecular oxygen;GO:0020037//heme binding;GO:0016491//oxidoreductase activity;GO:0004497//monooxygenase activity;GO:0005506//iron ion binding;GO:0046872//metal ion binding;GO:0003674//molecular_function;GO:0043167//ion binding	GO:0055114//oxidation-reduction process;GO:0008150//biological_process
ENSDARG00000061375	820	1703	42.575	94.305	1.14733	4.12022e-08	2.57588e-06	yes	sgpl1	sphingosine-1-phosphate lyase 1 [Source:ZFIN;Acc:ZDB-GENE-070410-24]	ko01100//Metabolic pathways;ko00600//Sphingolipid metabolism	-	GO:0016829//lyase activity;GO:0003824//catalytic activity;GO:0030170//pyridoxal phosphate binding;GO:0016831//carboxy-lyase activity;GO:0003674//molecular_function;GO:0043167//ion binding	GO:0019752//carboxylic acid metabolic process;GO:0008150//biological_process;GO:0044281//small molecule metabolic process
ENSDARG00000105104	9.5	33	0.28	0.62	1.14684	0.000625312	0.0113286	yes	si:dkey-223p19.1	-	-	-	-	-
ENSDARG00000093193	107.5	212	10.14	22.395	1.14312	0.000605733	0.0110584	yes	chia.6	-	ko00520//Amino sugar and nucleotide sugar metabolism	-	GO:0003674//molecular_function;GO:0016798//hydrolase activity, acting on glycosyl bonds;GO:0003674//molecular_function;GO:0016798//hydrolase activity, acting on glycosyl bonds	GO:0008150//biological_process;GO:0009056//catabolic process;GO:0005975//carbohydrate metabolic process;GO:0008150//biological_process;GO:0009056//catabolic process;GO:0005975//carbohydrate metabolic process
ENSDARG00000003380	110.5	266	7.325	16.155	1.14108	8.19187e-07	3.85491e-05	yes	PAOX	polyamine oxidase (exo-N4-amino) [Source:HGNC Symbol;Acc:HGNC:20837]	ko04146//Peroxisome	-	GO:0003674//molecular_function;GO:0016491//oxidoreductase activity	-
ENSDARG00000020876	283.5	618.5	9.765	21.535	1.14099	7.8805e-06	0.000284549	yes	pdk2a	-	-	-	-	-
ENSDARG00000088337	38	83	0.685	1.51	1.14037	0.000626673	0.0113454	yes	wu:fc34e06	-	-	-	-	-
ENSDARG00000037425	383.5	835.5	72.92	160.405	1.13733	5.45654e-08	3.34531e-06	yes	s100a10a	S100 calcium binding protein A10a [Source:ZFIN;Acc:ZDB-GENE-041010-35]	-	GO:0005575//cellular_component;GO:0005575//cellular_component	GO:0005509//calcium ion binding;GO:0046872//metal ion binding;GO:0003674//molecular_function;GO:0043167//ion binding	-
ENSDARG00000105255	129	283	2.21	4.86	1.13691	5.26322e-05	0.00145352	yes	zbtb4	-	-	-	-	-
ENSDARG00000051912	36	78.5	3.795	8.345	1.13681	0.000809729	0.0139706	yes	HPX (2 of 2)	-	-	GO:0005575//cellular_component;GO:0005575//cellular_component	GO:0046872//metal ion binding;GO:0003674//molecular_function;GO:0043167//ion binding	GO:0008150//biological_process;GO:0008150//biological_process
ENSDARG00000042978	92	201	5.075	11.155	1.13621	9.73738e-06	0.000339831	yes	cyp2p6	-	ko01100//Metabolic pathways;ko00590//Arachidonic acid metabolism;ko00591//Linoleic acid metabolism	GO:0005737//cytoplasm;GO:0043231//intracellular membrane-bounded organelle;GO:0005575//cellular_component;GO:0005622//intracellular;GO:0005623//cell;GO:0043226//organelle;GO:0005737//cytoplasm	GO:0046872//metal ion binding;GO:0019825//oxygen binding;GO:0016705//oxidoreductase activity, acting on paired donors, with incorporation or reduction of molecular oxygen;GO:0016712//oxidoreductase activity, acting on paired donors, with incorporation or reduction of molecular oxygen, reduced flavin or flavoprotein as one donor, and incorporation of one atom of oxygen;GO:0020037//heme binding;GO:…	GO:0042738//exogenous drug catabolic process;GO:0019369//arachidonic acid metabolic process;GO:0055114//oxidation-reduction process;GO:0006805//xenobiotic metabolic process;GO:0008150//biological_process;GO:0006629//lipid metabolic process;GO:0044281//small molecule metabolic process;GO:0009056//catabolic process
ENSDARG00000086826	754.5	1644.5	90.98	199.71	1.13429	1.49209e-08	1.01564e-06	yes	sult6b1	sulfotransferase family, cytosolic, 6b, member 1 [Source:ZFIN;Acc:ZDB-GENE-050417-228]	-	GO:0005575//cellular_component;GO:0005575//cellular_component	GO:0018721;GO:0018724;GO:0018727;GO:0050694//galactose 3-O-sulfotransferase activity;GO:0080131//hydroxyjasmonate sulfotransferase activity;GO:0001537//N-acetylgalactosamine 4-O-sulfotransferase activity;GO:0016740//transferase activity;GO:0008146//sulfotransferase activity;GO:0016232//HNK-1 sulfotransferase activity;GO:0018722;GO:0018725;GO:0019111;GO:0050698//proteoglycan sulfotransferase activ…	GO:0071466//cellular response to xenobiotic stimulus;GO:0008150//biological_process
ENSDARG00000015164	673.5	1415.5	24.26	53.2	1.13285	3.50381e-07	1.81239e-05	yes	mknk2b	MAP kinase interacting serine/threonine kinase 2b [Source:ZFIN;Acc:ZDB-GENE-030829-2]	ko04010//MAPK signaling pathway;ko04910//Insulin signaling pathway	GO:0005634//nucleus;GO:0005737//cytoplasm;GO:0005575//cellular_component;GO:0005622//intracellular;GO:0005623//cell;GO:0005737//cytoplasm;GO:0005634//nucleus;GO:0043226//organelle;GO:0005634//nucleus;GO:0005737//cytoplasm;GO:0005575//cellular_component;GO:0005622//intracellular;GO:0005623//cell;GO:0005737//cytoplasm;GO:0005634//nucleus;GO:0043226//organelle	GO:0005524//ATP binding;GO:0016772//transferase activity, transferring phosphorus-containing groups;GO:0004672//protein kinase activity;GO:0005516//calmodulin binding;GO:0016740//transferase activity;GO:0009931//calcium-dependent protein serine/threonine kinase activity;GO:0004683//calmodulin-dependent protein kinase activity;GO:0016301//kinase activity;GO:0000166//nucleotide binding;GO:0003674//…	GO:0016310//phosphorylation;GO:0006468//protein phosphorylation;GO:0035556//intracellular signal transduction;GO:0018105//peptidyl-serine phosphorylation;GO:0046777//protein autophosphorylation;GO:0007166//cell surface receptor signaling pathway;GO:0007165//signal transduction;GO:0008150//biological_process;GO:0006464//cellular protein modification process;GO:0016310//phosphorylation;GO:0006468//…
ENSDARG00000055591	114.5	250.5	8.18	17.93	1.1322	1.74289e-05	0.000566549	yes	pipox	pipecolic acid oxidase [Source:ZFIN;Acc:ZDB-GENE-110627-2]	ko01100//Metabolic pathways;ko04146//Peroxisome;ko00310//Lysine degradation;ko00260//Glycine, serine and threonine metabolism	-	GO:0003674//molecular_function;GO:0016491//oxidoreductase activity	-
ENSDARG00000076448	163	353	13.89	30.445	1.13216	3.02519e-06	0.000123422	yes	serpinf2a	-	-	-	GO:0003674//molecular_function;GO:0030234//enzyme regulator activity	GO:0008150//biological_process
ENSDARG00000057826	207	442	8.665	18.95	1.12893	1.09428e-06	5.00489e-05	yes	si:ch73-61d6.3	-	ko04530//Tight junction;ko04670//Leukocyte transendothelial migration;ko05160//Hepatitis C;ko05130//Pathogenic Escherichia coli infection;ko04514//Cell adhesion molecules (CAMs)	-	-	-
ENSDARG00000005749	102	220	3.565	7.785	1.12679	2.56531e-05	0.000791451	yes	cand2	cullin-associated and neddylation-dissociated 2 (putative) [Source:ZFIN;Acc:ZDB-GENE-060503-645]	-	GO:0005634//nucleus;GO:0005575//cellular_component;GO:0005622//intracellular;GO:0005623//cell;GO:0005634//nucleus;GO:0043226//organelle	-	GO:0010265//SCF complex assembly;GO:0016567//protein ubiquitination;GO:0006464//cellular protein modification process;GO:0008150//biological_process;GO:0006461//protein complex assembly;GO:0022607//cellular component assembly;GO:0065003
ENSDARG00000021250	130.5	288	15.21	33.18	1.12529	1.60167e-06	7.02954e-05	yes	slc25a48	solute carrier family 25, member 48 [Source:ZFIN;Acc:ZDB-GENE-040718-60]	-	GO:0005575//cellular_component;GO:0005622//intracellular;GO:0005623//cell;GO:0005737//cytoplasm;GO:0005739//mitochondrion;GO:0043226//organelle	-	GO:0006810//transport;GO:0008150//biological_process;GO:0055085//transmembrane transport
ENSDARG00000045557	71	153	7.29	15.885	1.12367	0.000169161	0.00392351	yes	socs2	suppressor of cytokine signaling 2 [Source:ZFIN;Acc:ZDB-GENE-041210-171]	ko04910//Insulin signaling pathway;ko04630//Jak-STAT signaling pathway;ko04930//Type II diabetes mellitus	GO:0005737//cytoplasm;GO:0005575//cellular_component;GO:0005622//intracellular;GO:0005623//cell;GO:0005737//cytoplasm;GO:0005737//cytoplasm;GO:0005575//cellular_component;GO:0005622//intracellular;GO:0005623//cell;GO:0005737//cytoplasm	GO:0008269//JAK pathway signal transduction adaptor activity;GO:0004860//protein kinase inhibitor activity;GO:0005159//insulin-like growth factor receptor binding;GO:0003674//molecular_function;GO:0030234//enzyme regulator activity;GO:0030674//protein binding, bridging;GO:0008269//JAK pathway signal transduction adaptor activity;GO:0004860//protein kinase inhibitor activity;GO:0005159//insulin-li…	GO:0016567//protein ubiquitination;GO:0046426//negative regulation of JAK-STAT cascade;GO:0035556//intracellular signal transduction;GO:0046627//negative regulation of insulin receptor signaling pathway;GO:0019221//cytokine-mediated signaling pathway;GO:0001558//regulation of cell growth;GO:0008150//biological_process;GO:0007165//signal transduction;GO:0006464//cellular protein modification proce…
ENSDARG00000061481	56.5	122	3.36	7.32	1.12338	0.000359691	0.00731823	yes	CABZ01041812.1	-	-	-	-	-
ENSDARG00000052074	104.5	227	8.78	19.12	1.12279	4.08091e-05	0.00117818	yes	zmp:0000001085	-	-	-	-	-
ENSDARG00000020054	99.5	215.5	2.985	6.5	1.12271	2.79304e-05	0.00085263	yes	aox1	-	ko01100//Metabolic pathways;ko00280//Valine, leucine and isoleucine degradation;ko00380//Tryptophan metabolism;ko00982//Drug metabolism - cytochrome P450;ko00350//Tyrosine metabolism;ko00760//Nicotinate and nicotinamide metabolism;ko00750//Vitamin B6 metabolism	-	GO:0046872//metal ion binding;GO:0016491//oxidoreductase activity;GO:0016614//oxidoreductase activity, acting on CH-OH group of donors;GO:0050660//flavin adenine dinucleotide binding;GO:0003824//catalytic activity;GO:0005506//iron ion binding;GO:0051536//iron-sulfur cluster binding;GO:0008762//UDP-N-acetylmuramate dehydrogenase activity;GO:0051537//2 iron, 2 sulfur cluster binding;GO:0009055//ele…	GO:0055114//oxidation-reduction process;GO:0008150//biological_process
XLOC_002487	25	54	3.51	7.64	1.1221	0.00360898	0.0444618	yes	TCONS_00006458	PREDICTED: unconventional myosin-XVIIIb-like, partial [Danio rerio]	-	-	-	-
ENSDARG00000058158	23	49.5	1.97	4.285	1.1211	0.00293092	0.0380903	yes	trim55b	tripartite motif containing 55b [Source:ZFIN;Acc:ZDB-GENE-060312-37]	-	GO:0005622//intracellular;GO:0005575//cellular_component;GO:0005623//cell	GO:0046872//metal ion binding;GO:0008270//zinc ion binding;GO:0003674//molecular_function;GO:0043167//ion binding	-
ENSDARG00000013522	1220	2662.5	77.71	169.01	1.12094	5.54034e-08	3.38259e-06	yes	pck1	phosphoenolpyruvate carboxykinase 1 (soluble) [Source:ZFIN;Acc:ZDB-GENE-030909-11]	ko01100//Metabolic pathways;ko04910//Insulin signaling pathway;ko04920//Adipocytokine signaling pathway;ko00010//Glycolysis / Gluconeogenesis;ko03320//PPAR signaling pathway;ko00620//Pyruvate metabolism;ko00020//Citrate cycle (TCA cycle);ko04964//Proximal tubule bicarbonate reclamation	-	GO:0017076//purine nucleotide binding;GO:0004611//phosphoenolpyruvate carboxykinase activity;GO:0016740//transferase activity;GO:0004613//phosphoenolpyruvate carboxykinase (GTP) activity;GO:0016301//kinase activity;GO:0005525//GTP binding;GO:0003674//molecular_function;GO:0043167//ion binding;GO:0016829//lyase activity	GO:0009749//response to glucose;GO:0016310//phosphorylation;GO:0006094//gluconeogenesis;GO:0005975//carbohydrate metabolic process;GO:0008150//biological_process;GO:0009058//biosynthetic process
ENSDARG00000075676	69.5	131.5	4.21	9.155	1.12074	0.00263773	0.035089	yes	fndc7b	-	-	-	-	-
ENSDARG00000054211	39.5	88	3.885	8.43	1.11762	0.000589375	0.0108357	yes	st8sia7.1	ST8 alpha-N-acetyl-neuraminide alpha-2,8-sialyltransferase 7.1 [Source:ZFIN;Acc:ZDB-GENE-090504-4]	-	GO:0005575//cellular_component;GO:0005622//intracellular;GO:0005623//cell;GO:0005737//cytoplasm;GO:0005794//Golgi apparatus;GO:0043226//organelle	GO:0003674//molecular_function;GO:0016757//transferase activity, transferring glycosyl groups	GO:0005975//carbohydrate metabolic process;GO:0006464//cellular protein modification process;GO:0008150//biological_process;GO:0009058//biosynthetic process
ENSDARG00000040705	142.5	307	7.615	16.465	1.11249	2.56768e-06	0.000106761	yes	glsb	-	ko01100//Metabolic pathways;ko04724//Glutamatergic synapse;ko00330//Arginine and proline metabolism;ko00250//Alanine, aspartate and glutamate metabolism;ko04964//Proximal tubule bicarbonate reclamation;ko00471//D-Glutamine and D-glutamate metabolism	-	-	-
ENSDARG00000015731	87	186.5	3.915	8.425	1.10566	0.00210549	0.0297934	yes	ano5a	anoctamin 5a [Source:ZFIN;Acc:ZDB-GENE-091013-2]	-	GO:0005575//cellular_component	-	-
ENSDARG00000012194	837	1741	53.75	115.455	1.10299	8.12673e-07	3.83117e-05	yes	scp2a	-	ko01100//Metabolic pathways;ko04146//Peroxisome;ko03320//PPAR signaling pathway;ko00120//Primary bile acid biosynthesis	-	GO:0016747//transferase activity, transferring acyl groups other than amino-acyl groups;GO:0003824//catalytic activity;GO:0003674//molecular_function;GO:0016746//transferase activity, transferring acyl groups	GO:0008152//metabolic process;GO:0008150//biological_process
ENSDARG00000095147	568.5	1209.5	56.215	120.67	1.10204	4.25789e-08	2.64924e-06	yes	krt96	keratin 96 [Source:ZFIN;Acc:ZDB-GENE-030131-221]	-	GO:0005882//intermediate filament;GO:0005575//cellular_component;GO:0005622//intracellular;GO:0005623//cell;GO:0005856//cytoskeleton;GO:0043226//organelle;GO:0043234//protein complex	GO:0005198//structural molecule activity;GO:0003674//molecular_function	-
ENSDARG00000068621	37	76.5	0.86	1.845	1.10121	0.00146822	0.022743	yes	si:ch211-181d7.3	-	-	-	-	-
ENSDARG00000079420	245	524.5	9.92	21.265	1.10007	5.87831e-07	2.85377e-05	yes	dpp4	-	-	-	-	-
ENSDARG00000042753	58.5	127.5	6.9	14.78	1.09898	0.00045875	0.00886555	yes	ctskl	-	-	-	-	-
ENSDARG00000100971	58	119	10.95	23.425	1.09712	0.00380955	0.0462792	yes	fxyd6	-	-	GO:0005887//integral component of plasma membrane;GO:0016020//membrane;GO:0005575//cellular_component;GO:0005623//cell;GO:0005886//plasma membrane;GO:0005887//integral component of plasma membrane;GO:0016020//membrane;GO:0005575//cellular_component;GO:0005623//cell;GO:0005886//plasma membrane	GO:0017080//sodium channel regulator activity;GO:0005216//ion channel activity;GO:0003674//molecular_function;GO:0022857//transmembrane transporter activity;GO:0017080//sodium channel regulator activity;GO:0005216//ion channel activity;GO:0003674//molecular_function;GO:0022857//transmembrane transporter activity	GO:0006811//ion transport;GO:2000649//regulation of sodium ion transmembrane transporter activity;GO:0008150//biological_process;GO:0006810//transport;GO:0006811//ion transport;GO:2000649//regulation of sodium ion transmembrane transporter activity;GO:0008150//biological_process;GO:0006810//transport
ENSDARG00000028731	51	110	2.595	5.545	1.09545	0.000695681	0.0123555	yes	stat4	-	ko04630//Jak-STAT signaling pathway	-	-	-
ENSDARG00000100476	52.5	115	8.045	17.14	1.0912	0.000385904	0.00771511	yes	si:dkeyp-110c7.4	-	-	-	-	-
XLOC_005204	27	56.5	2.725	5.805	1.09104	0.00285479	0.0373054	yes	TCONS_00012986	PREDICTED: phosphofurin acidic cluster sorting protein 1-like [Danio rerio]	-	-	-	-
ENSDARG00000052734	287.5	613.5	11.02	23.45	1.08946	5.5933e-07	2.73066e-05	yes	hmgcra	3-hydroxy-3-methylglutaryl-CoA reductase a [Source:ZFIN;Acc:ZDB-GENE-040401-2]	ko01100//Metabolic pathways;ko04976//Bile secretion;ko00900//Terpenoid backbone biosynthesis	GO:0005783//endoplasmic reticulum;GO:0016021//integral component of membrane;GO:0005789//endoplasmic reticulum membrane;GO:0016020//membrane;GO:0005778//peroxisomal membrane;GO:0005575//cellular_component;GO:0005622//intracellular;GO:0005623//cell;GO:0005737//cytoplasm;GO:0005777//peroxisome;GO:0043226//organelle	GO:0016616//oxidoreductase activity, acting on the CH-OH group of donors, NAD or NADP as acceptor;GO:0050662//coenzyme binding;GO:0004420//hydroxymethylglutaryl-CoA reductase (NADPH) activity;GO:0016491//oxidoreductase activity;GO:0050661//NADP binding;GO:0042282//hydroxymethylglutaryl-CoA reductase activity;GO:0003674//molecular_function	GO:0055114//oxidation-reduction process;GO:0008299//isoprenoid biosynthetic process;GO:0007519//skeletal muscle tissue development;GO:0015936//coenzyme A metabolic process;GO:0016126//sterol biosynthetic process;GO:0006629//lipid metabolic process;GO:0008150//biological_process;GO:0009058//biosynthetic process;GO:0044281//small molecule metabolic process;GO:0034641//cellular nitrogen compound met…
ENSDARG00000063078	31	65.5	1.7	3.61	1.08646	0.0036204	0.0445207	yes	abcg5	ATP-binding cassette, sub-family G (WHITE), member 5 [Source:ZFIN;Acc:ZDB-GENE-050517-40]	ko04976//Bile secretion;ko04975//Fat digestion and absorption;ko02010//ABC transporters	GO:0016020//membrane;GO:0005575//cellular_component	GO:0016887//ATPase activity;GO:0000166//nucleotide binding;GO:0005524//ATP binding;GO:0003674//molecular_function;GO:0043167//ion binding	-
ENSDARG00000031647	76.5	161	1.505	3.195	1.08605	0.000396952	0.00790592	yes	stat2	-	-	GO:0005737//cytoplasm;GO:0005634//nucleus;GO:0005575//cellular_component;GO:0005622//intracellular;GO:0005623//cell;GO:0043226//organelle	GO:0003700//sequence-specific DNA binding transcription factor activity;GO:0004871//signal transducer activity;GO:0003677//DNA binding;GO:0003674//molecular_function;GO:0001071//nucleic acid binding transcription factor activity	GO:0006355//regulation of transcription, DNA-templated;GO:0007165//signal transduction;GO:0006351//transcription, DNA-templated;GO:0008150//biological_process;GO:0009058//biosynthetic process;GO:0034641//cellular nitrogen compound metabolic process
ENSDARG00000032571	61.5	130	4.405	9.345	1.08505	0.000191755	0.004347	yes	il20ra	interleukin 20 receptor, alpha [Source:ZFIN;Acc:ZDB-GENE-040724-249]	ko04060//Cytokine-cytokine receptor interaction;ko04630//Jak-STAT signaling pathway	GO:0016021//integral component of membrane;GO:0005886//plasma membrane;GO:0005575//cellular_component;GO:0005623//cell;GO:0005886//plasma membrane	GO:0042015//interleukin-20 binding;GO:0004896//cytokine receptor activity;GO:0003674//molecular_function;GO:0004871//signal transducer activity	-
ENSDARG00000090371	26	54.5	1.195	2.53	1.08213	0.00335691	0.0421122	yes	BX664721.4	-	-	-	-	-
ENSDARG00000019396	27.5	57.5	2.055	4.35	1.08188	0.00309669	0.0397885	yes	rergla	-	-	-	-	-
ENSDARG00000056643	33	69.5	2.62	5.545	1.08162	0.00168271	0.0251972	yes	slc22a7b.1	solute carrier family 22 (organic anion transporter), member 7b, tandem duplicate 1 [Source:ZFIN;Acc:ZDB-GENE-040426-1311]	-	GO:0016020//membrane;GO:0016021//integral component of membrane;GO:0005575//cellular_component	GO:0022857//transmembrane transporter activity;GO:0003674//molecular_function	GO:0055085//transmembrane transport;GO:0006810//transport;GO:0008150//biological_process
ENSDARG00000101074	5868.5	12354.5	295.41	624.84	1.08077	5.74422e-09	4.11406e-07	yes	glud1b	glutamate dehydrogenase 1b [Source:ZFIN;Acc:ZDB-GENE-030828-1]	ko01100//Metabolic pathways;ko00330//Arginine and proline metabolism;ko00250//Alanine, aspartate and glutamate metabolism;ko04964//Proximal tubule bicarbonate reclamation;ko00471//D-Glutamine and D-glutamate metabolism	GO:0005575//cellular_component;GO:0005575//cellular_component	GO:0016491//oxidoreductase activity;GO:0003674//molecular_function	GO:0055114//oxidation-reduction process;GO:0006520//cellular amino acid metabolic process;GO:0008150//biological_process;GO:0044281//small molecule metabolic process
ENSDARG00000102364	113	249.5	3.635	7.675	1.07821	5.10576e-06	0.000195458	yes	si:dkey-202l22.6	-	-	-	GO:0005525//GTP binding;GO:0003674//molecular_function;GO:0043167//ion binding	-
ENSDARG00000062319	147.5	308.5	12.585	26.54	1.07646	6.45265e-06	0.000239972	yes	si:dkey-103g5.3	-	-	-	-	-
ENSDARG00000042188	104.5	218.5	4.445	9.37	1.07587	4.44392e-05	0.00126339	yes	ttc38	-	-	-	-	-
ENSDARG00000057671	144.5	303	2.08	4.38	1.07435	3.62222e-06	0.000143512	yes	epas1b	endothelial PAS domain protein 1b [Source:ZFIN;Acc:ZDB-GENE-060607-11]	-	GO:0005634//nucleus;GO:0005575//cellular_component;GO:0005622//intracellular;GO:0005623//cell;GO:0043226//organelle	GO:0003677//DNA binding;GO:0004871//signal transducer activity;GO:0000976//transcription regulatory region sequence-specific DNA binding;GO:0046983//protein dimerization activity;GO:0003674//molecular_function	GO:0051402//neuron apoptotic process;GO:0014823//response to activity;GO:0030182//neuron differentiation;GO:0043523//regulation of neuron apoptotic process;GO:0006355//regulation of transcription, DNA-templated;GO:0048565//digestive tract development;GO:0001666//response to hypoxia;GO:0006351//transcription, DNA-templated;GO:0031017//exocrine pancreas development;GO:0007165//signal transduction;G…
ENSDARG00000038475	266	582	21.395	44.98	1.07201	9.01225e-08	5.26792e-06	yes	acy1	aminoacylase 1 [Source:ZFIN;Acc:ZDB-GENE-040426-755]	ko01100//Metabolic pathways;ko00330//Arginine and proline metabolism	GO:0005737//cytoplasm;GO:0005575//cellular_component;GO:0005622//intracellular;GO:0005623//cell;GO:0005737//cytoplasm;GO:0005575//cellular_component;GO:0005622//intracellular;GO:0005623//cell	GO:0016787//hydrolase activity;GO:0008237//metallopeptidase activity;GO:0004046//aminoacylase activity;GO:0046872//metal ion binding;GO:0003674//molecular_function;GO:0043167//ion binding;GO:0016810//hydrolase activity, acting on carbon-nitrogen (but not peptide) bonds;GO:0008233//peptidase activity;GO:0016787//hydrolase activity;GO:0008237//metallopeptidase activity;GO:0004046//aminoacylase acti…	GO:0006508//proteolysis;GO:0006520//cellular amino acid metabolic process;GO:0008152//metabolic process;GO:0008150//biological_process;GO:0044281//small molecule metabolic process;GO:0006508//proteolysis;GO:0006520//cellular amino acid metabolic process;GO:0008152//metabolic process;GO:0008150//biological_process;GO:0044281//small molecule metabolic process
ENSDARG00000055036	91.5	173.5	6.85	14.36	1.06788	0.000592725	0.010874	yes	itih3a	inter-alpha-trypsin inhibitor heavy chain 3a [Source:ZFIN;Acc:ZDB-GENE-050522-262]	-	GO:0005575//cellular_component;GO:0005575//cellular_component	GO:0004867//serine-type endopeptidase inhibitor activity;GO:0003674//molecular_function;GO:0030234//enzyme regulator activity	GO:0030212//hyaluronan metabolic process;GO:0008150//biological_process
ENSDARG00000045143	1871.5	3845.5	727.54	1522.34	1.06519	1.3346e-06	5.95772e-05	yes	hbbe2	hemoglobin beta embryonic-2 [Source:ZFIN;Acc:ZDB-GENE-040702-1]	-	GO:0005833//hemoglobin complex;GO:0005575//cellular_component;GO:0005622//intracellular;GO:0005623//cell;GO:0005737//cytoplasm;GO:0005829//cytosol;GO:0043234//protein complex	GO:0005344//oxygen transporter activity;GO:0019825//oxygen binding;GO:0020037//heme binding;GO:0005506//iron ion binding;GO:0046872//metal ion binding;GO:0003674//molecular_function;GO:0043167//ion binding	GO:0015671//oxygen transport;GO:0006810//transport;GO:0008150//biological_process
ENSDARG00000052515	25.5	60	1.565	3.27	1.06313	0.00117923	0.0190126	yes	calcoco2	-	-	-	-	-
ENSDARG00000068199	53.5	110.5	4.28	8.94	1.06266	0.000806828	0.013939	yes	pld3	-	-	-	-	-
ENSDARG00000033832	1514	3133.5	81.755	170.75	1.06251	4.91881e-07	2.46129e-05	yes	ampd1	adenosine monophosphate deaminase 1 (isoform M) [Source:ZFIN;Acc:ZDB-GENE-040426-1906]	ko01100//Metabolic pathways;ko00230//Purine metabolism	GO:0005575//cellular_component;GO:0005575//cellular_component	GO:0003876//AMP deaminase activity;GO:0019239//deaminase activity;GO:0003674//molecular_function;GO:0016810//hydrolase activity, acting on carbon-nitrogen (but not peptide) bonds	GO:0032264//IMP salvage;GO:0009168//purine ribonucleoside monophosphate biosynthetic process;GO:0008150//biological_process;GO:0009058//biosynthetic process;GO:0034641//cellular nitrogen compound metabolic process;GO:0044281//small molecule metabolic process
ENSDARG00000029290	57.5	118.5	5.375	11.22	1.06174	0.000469164	0.00901999	yes	stx11b.1	syntaxin 11b, tandem duplicate 1 [Source:ZFIN;Acc:ZDB-GENE-040426-1893]	ko04130//SNARE interactions in vesicular transport	GO:0016020//membrane;GO:0005886//plasma membrane;GO:0031201//SNARE complex;GO:0016021//integral component of membrane;GO:0008021//synaptic vesicle;GO:0012505//endomembrane system;GO:0005794//Golgi apparatus;GO:0005575//cellular_component;GO:0005622//intracellular;GO:0005623//cell;GO:0005737//cytoplasm;GO:0043226//organelle;GO:0016023//cytoplasmic membrane-bounded vesicle;GO:0043234//protein compl…	GO:0005484//SNAP receptor activity;GO:0000149//SNARE binding;GO:0003674//molecular_function	GO:0048278//vesicle docking;GO:0016192//vesicle-mediated transport;GO:0006886//intracellular protein transport;GO:0031629//synaptic vesicle fusion to presynaptic membrane;GO:0006810//transport;GO:0007267//cell-cell signaling;GO:0008150//biological_process;GO:0061024//membrane organization
ENSDARG00000045887	157	323.5	13.21	27.545	1.06016	7.25508e-06	0.000265273	yes	mmp30	matrix metallopeptidase 30 [Source:ZFIN;Acc:ZDB-GENE-060421-5765]	-	GO:0031012//extracellular matrix;GO:0005575//cellular_component	GO:0004222//metalloendopeptidase activity;GO:0005509//calcium ion binding;GO:0008237//metallopeptidase activity;GO:0008270//zinc ion binding;GO:0016787//hydrolase activity;GO:0008233//peptidase activity;GO:0046872//metal ion binding;GO:0003674//molecular_function;GO:0043167//ion binding	GO:0006508//proteolysis;GO:0008150//biological_process
ENSDARG00000076041	52	110.5	1.695	3.53	1.05838	0.00114656	0.0186235	yes	wwc1	-	-	-	-	-
ENSDARG00000091116	267	553.5	2.525	5.255	1.05741	3.13958e-07	1.63371e-05	yes	pkhd1l1	-	-	-	-	-
ENSDARG00000089177	49.5	102	3.77	7.825	1.05353	0.000632948	0.0114431	yes	cyp46a1.3	cytochrome P450, family 46, subfamily A, polypeptide 1, tandem duplicate 3 [Source:ZFIN;Acc:ZDB-GENE-060519-40]	ko00120//Primary bile acid biosynthesis	GO:0005575//cellular_component;GO:0005575//cellular_component	GO:0016705//oxidoreductase activity, acting on paired donors, with incorporation or reduction of molecular oxygen;GO:0020037//heme binding;GO:0016491//oxidoreductase activity;GO:0004497//monooxygenase activity;GO:0005506//iron ion binding;GO:0046872//metal ion binding;GO:0003674//molecular_function;GO:0043167//ion binding	GO:0055114//oxidation-reduction process;GO:0008150//biological_process
ENSDARG00000033144	28.5	58.5	2.39	4.95	1.05042	0.00338263	0.0423764	yes	psme2	proteasome (prosome, macropain) activator subunit 2 (PA28 beta) [Source:ZFIN;Acc:ZDB-GENE-991110-16]	ko03050//Proteasome;ko04612//Antigen processing and presentation	GO:0000502//proteasome complex;GO:0008537//proteasome activator complex;GO:0005575//cellular_component;GO:0005622//intracellular;GO:0005623//cell;GO:0043234//protein complex	-	-
ENSDARG00000044752	37.5	80.5	4.13	8.55	1.04978	0.000640744	0.011552	yes	p2rx4a	-	ko04080//Neuroactive ligand-receptor interaction;ko04020//Calcium signaling pathway	GO:0016021//integral component of membrane;GO:0005639//integral component of nuclear inner membrane;GO:0016020//membrane;GO:0034702//ion channel complex;GO:0005887//integral component of plasma membrane;GO:0005575//cellular_component;GO:0005623//cell;GO:0005886//plasma membrane;GO:0043234//protein complex;GO:0005622//intracellular;GO:0005634//nucleus;GO:0005635//nuclear envelope;GO:0043226//organ…	GO:0004931//extracellular ATP-gated cation channel activity;GO:0005524//ATP binding;GO:0005216//ion channel activity;GO:0001614//purinergic nucleotide receptor activity;GO:0000166//nucleotide binding;GO:0003674//molecular_function;GO:0004871//signal transducer activity;GO:0022857//transmembrane transporter activity;GO:0043167//ion binding	GO:0006812//cation transport;GO:0006810//transport;GO:0006811//ion transport;GO:0033198//response to ATP;GO:0070207//protein homotrimerization;GO:0006461//protein complex assembly;GO:0008150//biological_process;GO:0022607//cellular component assembly;GO:0065003;GO:0055085//transmembrane transport
ENSDARG00000038583	68	139	1.79	3.705	1.04951	0.000332959	0.00685101	yes	abraa	-	-	-	-	-
ENSDARG00000092976	141	277.5	5.115	10.57	1.04717	0.000126053	0.00305979	yes	si:ch211-127i16.2	-	ko01100//Metabolic pathways;ko00330//Arginine and proline metabolism;ko00380//Tryptophan metabolism;ko00260//Glycine, serine and threonine metabolism;ko00982//Drug metabolism - cytochrome P450;ko00350//Tyrosine metabolism;ko00340//Histidine metabolism;ko00360//Phenylalanine metabolism	-	-	-
ENSDARG00000055240	221	456.5	5.405	11.13	1.04209	3.41914e-05	0.00101062	yes	xdh	xanthine dehydrogenase [Source:ZFIN;Acc:ZDB-GENE-070719-9]	ko01100//Metabolic pathways;ko00230//Purine metabolism;ko04146//Peroxisome;ko00983//Drug metabolism - other enzymes;ko00232//Caffeine metabolism	GO:0005575//cellular_component;GO:0005622//intracellular;GO:0005623//cell;GO:0005737//cytoplasm;GO:0005829//cytosol	GO:0003674//molecular_function;GO:0043167//ion binding;GO:0016491//oxidoreductase activity	GO:0008150//biological_process;GO:0009056//catabolic process;GO:0034641//cellular nitrogen compound metabolic process;GO:0044281//small molecule metabolic process
ENSDARG00000086569	116	237	5.87	12.07	1.03999	3.08579e-05	0.000926802	yes	zgc:172051	zgc:172051 [Source:ZFIN;Acc:ZDB-GENE-080219-23]	-	GO:0005575//cellular_component;GO:0005575//cellular_component	GO:0003674//molecular_function;GO:0003674//molecular_function	GO:0008150//biological_process;GO:0008150//biological_process
ENSDARG00000086947	46	96.5	6.54	13.445	1.03971	0.00152758	0.0234534	yes	si:ch211-147m6.1	-	-	-	-	-
ENSDARG00000032584	35	71.5	2.42	4.975	1.03969	0.00195552	0.0282753	yes	thnsl2	-	-	-	-	-
ENSDARG00000069017	85.5	173	1.735	3.56	1.03694	0.000279878	0.00598557	yes	elnb	-	-	GO:0005575//cellular_component;GO:0005575//cellular_component	GO:0003674//molecular_function;GO:0003674//molecular_function	GO:0008150//biological_process;GO:0008150//biological_process
ENSDARG00000068194	99.5	201.5	10.075	20.66	1.03606	8.55571e-05	0.00219535	yes	klf9	Kruppel-like factor 9 [Source:ZFIN;Acc:ZDB-GENE-060526-244]	-	-	GO:0003676//nucleic acid binding;GO:0046872//metal ion binding;GO:0003674//molecular_function;GO:0043167//ion binding	-
ENSDARG00000024032	114.5	237.5	10.485	21.495	1.03567	2.63577e-05	0.000808406	yes	coch	-	-	-	-	-
ENSDARG00000094929	445.5	906.5	78.795	161.52	1.03554	3.1171e-06	0.000126381	yes	apoa4b.3	apolipoprotein A-IV b, tandem duplicate 3 [Source:ZFIN;Acc:ZDB-GENE-100921-47]	-	GO:0005575//cellular_component;GO:0005576//extracellular region;GO:0005615//extracellular space	GO:0003674//molecular_function;GO:0008289//lipid binding;GO:0030234//enzyme regulator activity;GO:0043167//ion binding	GO:0008150//biological_process;GO:0006950//response to stress;GO:0030154//cell differentiation;GO:0048856//anatomical structure development;GO:0042592//homeostatic process;GO:0022607//cellular component assembly;GO:0065003;GO:0006629//lipid metabolic process;GO:0034641//cellular nitrogen compound metabolic process;GO:0044281//small molecule metabolic process;GO:0006810//transport;GO:0009058//bios…
ENSDARG00000006031	549	1115	34.665	70.965	1.03363	2.9222e-07	1.54841e-05	yes	abat	4-aminobutyrate aminotransferase [Source:ZFIN;Acc:ZDB-GENE-031006-4]	ko01100//Metabolic pathways;ko00280//Valine, leucine and isoleucine degradation;ko00640//Propanoate metabolism;ko00410//beta-Alanine metabolism;ko00250//Alanine, aspartate and glutamate metabolism;ko00650//Butanoate metabolism	-	GO:0030170//pyridoxal phosphate binding;GO:0003824//catalytic activity;GO:0016740//transferase activity;GO:0003867//4-aminobutyrate transaminase activity;GO:0008483//transaminase activity;GO:0003674//molecular_function;GO:0043167//ion binding	GO:0009448//gamma-aminobutyric acid metabolic process;GO:0006520//cellular amino acid metabolic process;GO:0008150//biological_process;GO:0044281//small molecule metabolic process
ENSDARG00000098051	95	194	4.695	9.61	1.03341	0.000165693	0.00386954	yes	si:busm1-234g15.3	si:busm1-234g15.3 [Source:ZFIN;Acc:ZDB-GENE-030616-402]	-	GO:0005575//cellular_component	GO:0003674//molecular_function;GO:0004871//signal transducer activity	GO:0007165//signal transduction;GO:0008150//biological_process;GO:0006464//cellular protein modification process
ENSDARG00000104829	60.5	128.5	13.35	27.285	1.03127	0.000168367	0.00390858	yes	zgc:112146	zgc:112146 [Source:ZFIN;Acc:ZDB-GENE-050417-237]	-	GO:0005575//cellular_component;GO:0005575//cellular_component	GO:0016491//oxidoreductase activity;GO:0003674//molecular_function	GO:0008152//metabolic process;GO:0008150//biological_process
ENSDARG00000051876	133.5	282	10.795	22.06	1.03107	8.56904e-06	0.000305602	yes	ush1c	-	-	GO:0005575//cellular_component;GO:0005575//cellular_component	GO:0051015//actin filament binding;GO:0005515//protein binding;GO:0003674//molecular_function;GO:0008092//cytoskeletal protein binding	GO:0050808//synapse organization;GO:0060122//inner ear receptor stereocilium organization;GO:0001964//startle response;GO:0046549//retinal cone cell development;GO:0007605//sensory perception of sound;GO:0008150//biological_process;GO:0050877//neurological system process;GO:0030154//cell differentiation;GO:0048856//anatomical structure development
ENSDARG00000092354	181.5	366	12.565	25.67	1.03067	3.39459e-05	0.00100451	yes	si:ch211-284e13.6	-	-	-	-	-
ENSDARG00000093078	31	62.5	7.125	14.555	1.03055	0.00338811	0.0423839	yes	plscr3a	phospholipid scramblase 3a [Source:ZFIN;Acc:ZDB-GENE-060531-17]	-	GO:0016020//membrane;GO:0005575//cellular_component	GO:0017128//phospholipid scramblase activity;GO:0003674//molecular_function	-
ENSDARG00000038865	156	317	5.725	11.695	1.03054	7.07157e-05	0.00186784	yes	acox3	acyl-CoA oxidase 3, pristanoyl [Source:ZFIN;Acc:ZDB-GENE-040426-2163]	ko01100//Metabolic pathways;ko04146//Peroxisome;ko03320//PPAR signaling pathway;ko00280//Valine, leucine and isoleucine degradation;ko00071//Fatty acid metabolism;ko00640//Propanoate metabolism;ko00410//beta-Alanine metabolism;ko01040//Biosynthesis of unsaturated fatty acids;ko00592//alpha-Linolenic acid metabolism	GO:0005777//peroxisome;GO:0005575//cellular_component;GO:0005622//intracellular;GO:0005623//cell;GO:0005737//cytoplasm;GO:0043226//organelle	GO:0016627//oxidoreductase activity, acting on the CH-CH group of donors;GO:0003997//acyl-CoA oxidase activity;GO:0050660//flavin adenine dinucleotide binding;GO:0003995//acyl-CoA dehydrogenase activity;GO:0003674//molecular_function;GO:0016491//oxidoreductase activity;GO:0043167//ion binding	GO:0055114//oxidation-reduction process;GO:0006631//fatty acid metabolic process;GO:0006635//fatty acid beta-oxidation;GO:0008152//metabolic process;GO:0008150//biological_process;GO:0006629//lipid metabolic process;GO:0009056//catabolic process;GO:0044281//small molecule metabolic process
ENSDARG00000079119	277.5	559.5	35.725	72.91	1.02918	2.16257e-06	9.18212e-05	yes	si:ch211-229d2.5	-	-	-	-	-
ENSDARG00000030463	95	192	9.805	19.985	1.02733	0.000443153	0.00864746	yes	tppp3	tubulin polymerization-promoting protein family member 3 [Source:ZFIN;Acc:ZDB-GENE-040426-1909]	-	GO:0005575//cellular_component;GO:0005575//cellular_component	-	GO:0008150//biological_process;GO:0008150//biological_process
ENSDARG00000068493	51	103.5	4.655	9.485	1.02687	0.00106556	0.0175263	yes	si:zfos-411a11.2	si:zfos-411a11.2 [Source:ZFIN;Acc:ZDB-GENE-131119-33]	-	GO:0005575//cellular_component;GO:0005622//intracellular;GO:0005623//cell;GO:0005737//cytoplasm;GO:0043226//organelle	GO:0003674//molecular_function;GO:0016491//oxidoreductase activity;GO:0043167//ion binding	GO:0008150//biological_process;GO:0009056//catabolic process;GO:0006629//lipid metabolic process;GO:0044281//small molecule metabolic process
ENSDARG00000022413	50.5	102.5	7.2	14.655	1.02532	0.00128408	0.0203625	yes	ing5a	inhibitor of growth family, member 5a [Source:ZFIN;Acc:ZDB-GENE-031016-1]	-	GO:0005634//nucleus;GO:0070776//MOZ/MORF histone acetyltransferase complex;GO:0005575//cellular_component;GO:0005622//intracellular;GO:0005623//cell;GO:0005654//nucleoplasm;GO:0043226//organelle;GO:0043234//protein complex;GO:0005634//nucleus;GO:0070776//MOZ/MORF histone acetyltransferase complex;GO:0005575//cellular_component;GO:0005622//intracellular;GO:0005623//cell;GO:0005654//nucleoplasm;GO:…	GO:0046872//metal ion binding;GO:0008270//zinc ion binding;GO:0003674//molecular_function;GO:0043167//ion binding;GO:0046872//metal ion binding;GO:0008270//zinc ion binding;GO:0003674//molecular_function;GO:0043167//ion binding	GO:0016568//chromatin modification;GO:0008285//negative regulation of cell proliferation;GO:0016573//histone acetylation;GO:0006464//cellular protein modification process;GO:0008150//biological_process;GO:0051276//chromosome organization;GO:0016568//chromatin modification;GO:0008285//negative regulation of cell proliferation;GO:0016573//histone acetylation;GO:0006464//cellular protein modificatio…
ENSDARG00000102442	77.5	157	14.955	30.415	1.02416	0.00165502	0.0249112	yes	FOLR1	folate receptor 1 (adult) [Source:HGNC Symbol;Acc:HGNC:3791]	ko04144//Endocytosis	GO:0005575//cellular_component;GO:0005575//cellular_component	GO:0003674//molecular_function;GO:0003674//molecular_function	GO:0008150//biological_process;GO:0008150//biological_process
ENSDARG00000087492	58.5	118	2.395	4.865	1.02241	0.000569374	0.0105125	yes	FO704810.2	-	-	-	-	-
ENSDARG00000044526	61.5	151	7.25	14.725	1.02221	4.09036e-06	0.00016047	yes	camk1ga	calcium/calmodulin-dependent protein kinase IGa [Source:ZFIN;Acc:ZDB-GENE-030131-7594]	-	GO:0005737//cytoplasm;GO:0005634//nucleus;GO:0005575//cellular_component;GO:0005622//intracellular;GO:0005623//cell;GO:0005634//nucleus;GO:0043226//organelle;GO:0005737//cytoplasm	GO:0004674//protein serine/threonine kinase activity;GO:0016772//transferase activity, transferring phosphorus-containing groups;GO:0004672//protein kinase activity;GO:0005524//ATP binding;GO:0005516//calmodulin binding;GO:0016740//transferase activity;GO:0004683//calmodulin-dependent protein kinase activity;GO:0016301//kinase activity;GO:0000166//nucleotide binding;GO:0009931//calcium-dependent …	GO:0016310//phosphorylation;GO:0006468//protein phosphorylation;GO:0035556//intracellular signal transduction;GO:0046777//protein autophosphorylation;GO:0018105//peptidyl-serine phosphorylation;GO:0006464//cellular protein modification process;GO:0008150//biological_process;GO:0007165//signal transduction
ENSDARG00000060504	186.5	362.5	9.59	19.44	1.01943	1.20078e-05	0.000409743	yes	pfkla	-	ko01100//Metabolic pathways;ko00010//Glycolysis / Gluconeogenesis;ko00030//Pentose phosphate pathway;ko00051//Fructose and mannose metabolism;ko00052//Galactose metabolism	-	-	-
ENSDARG00000070057	305	611	47.595	96.365	1.0177	6.51435e-06	0.000241372	yes	si:dkey-69o16.5	-	-	-	GO:0008236//serine-type peptidase activity;GO:0003674//molecular_function;GO:0008233//peptidase activity	GO:0006508//proteolysis;GO:0008150//biological_process
ENSDARG00000043518	76.5	155	5	10.11	1.01578	0.000231623	0.00508712	yes	si:dkey-239i20.2	si:dkey-239i20.2 [Source:ZFIN;Acc:ZDB-GENE-041001-98]	-	GO:0043231//intracellular membrane-bounded organelle;GO:0005783//endoplasmic reticulum;GO:0016020//membrane;GO:0005789//endoplasmic reticulum membrane;GO:0005575//cellular_component;GO:0005622//intracellular;GO:0005623//cell;GO:0005737//cytoplasm;GO:0043226//organelle	GO:0004499//N,N-dimethylaniline monooxygenase activity;GO:0050660//flavin adenine dinucleotide binding;GO:0050661//NADP binding;GO:0016491//oxidoreductase activity;GO:0004497//monooxygenase activity;GO:0003674//molecular_function;GO:0043167//ion binding	GO:0055114//oxidation-reduction process;GO:0017144//drug metabolic process;GO:0008150//biological_process
ENSDARG00000016939	36.5	73.5	1.36	2.745	1.0132	0.0027012	0.0357101	yes	itgb2	integrin, beta 2 [Source:ZFIN;Acc:ZDB-GENE-110411-4]	ko04810//Regulation of actin cytoskeleton;ko05152//Tuberculosis;ko04670//Leukocyte transendothelial migration;ko04145//Phagosome;ko05146//Amoebiasis;ko04514//Cell adhesion molecules (CAMs);ko04650//Natural killer cell mediated cytotoxicity;ko05323//Rheumatoid arthritis;ko05140//Leishmaniasis;ko05133//Pertussis;ko05416//Viral myocarditis;ko05144//Malaria;ko05150//Staphylococcus aureus infection	GO:0005575//cellular_component;GO:0005623//cell;GO:0005886//plasma membrane;GO:0043234//protein complex	GO:0003674//molecular_function	GO:0007155//cell adhesion;GO:0008150//biological_process;GO:0007165//signal transduction
ENSDARG00000007344	31	62	4.09	8.25	1.01229	0.00407999	0.0486575	yes	tcap	titin-cap (telethonin) [Source:ZFIN;Acc:ZDB-GENE-070501-5]	-	GO:0030018//Z disc;GO:0005575//cellular_component;GO:0005622//intracellular;GO:0005623//cell;GO:0005737//cytoplasm;GO:0043226//organelle	-	GO:0033292//T-tubule organization;GO:0060047//heart contraction;GO:0055001//muscle cell development;GO:0008150//biological_process;GO:0030154//cell differentiation;GO:0048856//anatomical structure development;GO:0003013;GO:0007009//plasma membrane organization;GO:0061024//membrane organization
ENSDARG00000041060	131.5	277	10.37	20.895	1.01074	9.6004e-06	0.000336401	yes	zgc:92326	zgc:92326 [Source:ZFIN;Acc:ZDB-GENE-040718-159]	-	GO:0005575//cellular_component;GO:0005575//cellular_component;GO:0005575//cellular_component;GO:0005575//cellular_component	GO:0030246//carbohydrate binding;GO:0003674//molecular_function;GO:0030246//carbohydrate binding;GO:0003674//molecular_function	GO:0008150//biological_process;GO:0008150//biological_process;GO:0008150//biological_process;GO:0008150//biological_process
ENSDARG00000069752	503.5	1018	50.72	102.02	1.00823	1.08005e-06	4.94849e-05	yes	ckba	-	-	GO:0005575//cellular_component;GO:0005575//cellular_component	GO:0016301//kinase activity;GO:0000166//nucleotide binding;GO:0016772//transferase activity, transferring phosphorus-containing groups;GO:0003824//catalytic activity;GO:0005524//ATP binding;GO:0016740//transferase activity;GO:0003674//molecular_function;GO:0043167//ion binding	GO:0016310//phosphorylation;GO:0008150//biological_process
XLOC_004576	66.5	133.5	7.37	14.815	1.00732	0.000725915	0.0127648	yes	TCONS_00011462	PREDICTED: uncharacterized protein LOC100332446 [Danio rerio]	-	-	-	-
ENSDARG00000062304	45	86	1.38	2.77	1.00522	0.00307662	0.0396274	yes	pdpk1a	-	-	GO:0005575//cellular_component;GO:0005575//cellular_component	GO:0005524//ATP binding;GO:0004672//protein kinase activity;GO:0000166//nucleotide binding;GO:0016772//transferase activity, transferring phosphorus-containing groups;GO:0003674//molecular_function;GO:0016301//kinase activity;GO:0043167//ion binding	GO:0006468//protein phosphorylation;GO:0006464//cellular protein modification process;GO:0008150//biological_process
ENSDARG00000001968	57	114	1.255	2.515	1.00287	0.00271266	0.0358253	yes	dock5	dedicator of cytokinesis 5 [Source:ZFIN;Acc:ZDB-GENE-080108-4]	-	-	GO:0005085//guanyl-nucleotide exchange factor activity;GO:0003674//molecular_function	GO:0007520//myoblast fusion;GO:0007264//small GTPase mediated signal transduction;GO:0007165//signal transduction;GO:0008150//biological_process;GO:0030154//cell differentiation;GO:0048646//anatomical structure formation involved in morphogenesis;GO:0048856//anatomical structure development
ENSDARG00000022698	81.5	163	5.3	10.62	1.00272	0.000366562	0.00742523	yes	lad1	-	-	-	-	-
ENSDARG00000018351	437.5	872	34.95	70	1.00206	9.36191e-07	4.34279e-05	yes	hpda	-	-	-	-	-
ENSDARG00000088589	63.5	126	13.315	26.64	1.00054	0.000550708	0.0102039	yes	ponzr3	plac8 onzin related protein 3 [Source:ZFIN;Acc:ZDB-GENE-050506-38]	-	GO:0005575//cellular_component	-	GO:0008150//biological_process
id	ENDO_count	MIX_count	ENDO_fpkm	MIX_fpkm	log2(FC)	Pvalue	FDR	significant	Symbol	Description	Pathway	GO Component	GO Function	GO Process
ENSDARG00000103456	5	0	0.55	0.001	-9.10329	0.00350919	0.0436056	yes	cyp2aa11	cytochrome P450, family 2, subfamily AA, polypeptide 11 [Source:ZFIN;Acc:ZDB-GENE-110114-3]	-	GO:0043231//intracellular membrane-bounded organelle;GO:0005737//cytoplasm;GO:0005575//cellular_component;GO:0005622//intracellular;GO:0005623//cell;GO:0005737//cytoplasm;GO:0043226//organelle	GO:0019825//oxygen binding;GO:0016712//oxidoreductase activity, acting on paired donors, with incorporation or reduction of molecular oxygen, reduced flavin or flavoprotein as one donor, and incorporation of one atom of oxygen;GO:0016705//oxidoreductase activity, acting on paired donors, with incorporation or reduction of molecular oxygen;GO:0020037//heme binding;GO:0005506//iron ion binding;GO:0…	GO:0055114//oxidation-reduction process;GO:0019369//arachidonic acid metabolic process;GO:0042738//exogenous drug catabolic process;GO:0006805//xenobiotic metabolic process;GO:0008150//biological_process;GO:0009056//catabolic process;GO:0006629//lipid metabolic process;GO:0044281//small molecule metabolic process
ENSDARG00000090814	13	0.5	1.825	0.07	-4.7044	5.88859e-06	0.000223458	yes	si:dkey-18a10.3	si:dkey-18a10.3 [Source:ZFIN;Acc:ZDB-GENE-091204-174]	-	GO:0005575//cellular_component;GO:0005622//intracellular;GO:0005623//cell;GO:0005634//nucleus;GO:0043226//organelle	GO:0003674//molecular_function;GO:0003677//DNA binding;GO:0001071//nucleic acid binding transcription factor activity	GO:0008150//biological_process
ENSDARG00000041490	247	10.5	57.02	2.475	-4.52597	4.8515e-32	1.75665e-29	yes	afp4	-	-	-	-	-
ENSDARG00000089806	10.5	0.5	1.445	0.07	-4.36757	6.38944e-05	0.00171902	yes	si:dkey-239j18.3	si:dkey-239j18.3 [Source:ZFIN;Acc:ZDB-GENE-121214-39]	-	-	GO:0003674//molecular_function;GO:0008233//peptidase activity	GO:0008150//biological_process
ENSDARG00000002508	11	0.5	0.71	0.035	-4.34239	4.96346e-05	0.00138393	yes	ankrd33ab	-	-	-	-	-
ENSDARG00000023656	15	1	2.72	0.155	-4.13327	5.86142e-06	0.000222751	yes	he1a	hatching enzyme 1a [Source:ZFIN;Acc:ZDB-GENE-021211-3]	-	-	GO:0016787//hydrolase activity;GO:0008233//peptidase activity;GO:0008237//metallopeptidase activity;GO:0046872//metal ion binding;GO:0008270//zinc ion binding;GO:0004222//metalloendopeptidase activity;GO:0003674//molecular_function;GO:0043167//ion binding	GO:0006508//proteolysis;GO:0008150//biological_process
ENSDARG00000101597	124.5	7.5	10.435	0.63	-4.04993	6.10392e-23	1.31512e-20	yes	PRR18 (2 of 2)	-	-	-	-	-
ENSDARG00000033160	197	12.5	9.095	0.58	-3.97095	8.62457e-25	2.12116e-22	yes	nr1d1	-	-	-	-	-
ENSDARG00000103347	254.5	17.5	21.48	1.475	-3.86421	6.29642e-29	2.0018e-26	yes	cyp2aa3	-	-	-	-	-
ENSDARG00000056885	35.5	2.5	0.98	0.07	-3.80735	4.06139e-09	2.99945e-07	yes	per1a	-	ko04710//Circadian rhythm - mammal;ko04711//Circadian rhythm - fly	GO:0005575//cellular_component;GO:0005575//cellular_component	GO:0004871//signal transducer activity;GO:0003674//molecular_function	GO:0009648//photoperiodism;GO:0007165//signal transduction;GO:0042542//response to hydrogen peroxide;GO:0006950//response to stress;GO:0008150//biological_process
ENSDARG00000099101	911	69	66.035	5.01	-3.72035	4.06633e-50	3.31278e-47	yes	gch2	GTP cyclohydrolase 2 [Source:ZFIN;Acc:ZDB-GENE-001205-3]	ko01100//Metabolic pathways;ko00790//Folate biosynthesis	GO:0005737//cytoplasm;GO:0005575//cellular_component;GO:0005622//intracellular;GO:0005623//cell;GO:0005737//cytoplasm	GO:0003934//GTP cyclohydrolase I activity;GO:0005525//GTP binding;GO:0008270//zinc ion binding;GO:0016787//hydrolase activity;GO:0003674//molecular_function;GO:0043167//ion binding;GO:0016810//hydrolase activity, acting on carbon-nitrogen (but not peptide) bonds	GO:0046654//tetrahydrofolate biosynthetic process;GO:0006729//tetrahydrobiopterin biosynthetic process;GO:0008150//biological_process;GO:0009058//biosynthetic process;GO:0034641//cellular nitrogen compound metabolic process;GO:0051186//cofactor metabolic process;GO:0006520//cellular amino acid metabolic process;GO:0044281//small molecule metabolic process
ENSDARG00000012297	59.5	4.5	4.305	0.33	-3.70548	1.40917e-12	1.53712e-10	yes	cnga3b	-	-	-	-	-
XLOC_012014	12	1	3.405	0.285	-3.57862	0.000158998	0.00374444	yes	TCONS_00029719	PREDICTED: LIM domain-containing protein 1 isoform X1 [Danio rerio]	-	GO:0043229//intracellular organelle;GO:0005912//adherens junction;GO:0030529//ribonucleoprotein complex	GO:0046872//metal ion binding	GO:0001649//osteoblast differentiation;GO:0006351//transcription, DNA-templated;GO:0035194//posttranscriptional gene silencing by RNA;GO:0009968//negative regulation of signal transduction;GO:0006996//organelle organization;GO:0050793//regulation of developmental process
ENSDARG00000012499	313.5	26.5	5.74	0.485	-3.56499	4.79853e-28	1.45462e-25	yes	per1b	period circadian clock 1b [Source:ZFIN;Acc:ZDB-GENE-040419-1]	ko04710//Circadian rhythm - mammal;ko04711//Circadian rhythm - fly	-	GO:0004871//signal transducer activity;GO:0003674//molecular_function	GO:0009416//response to light stimulus;GO:0007165//signal transduction;GO:0009266//response to temperature stimulus;GO:0008150//biological_process
ENSDARG00000097341	6.5	0.5	15.41	1.42	-3.4399	0.00374282	0.0457027	yes	-	-	-	-	-	-
ENSDARG00000088524	28.5	3	1.76	0.165	-3.41504	5.77763e-08	3.51102e-06	yes	zgc:77651	-	-	GO:0005575//cellular_component;GO:0005575//cellular_component;GO:0005575//cellular_component;GO:0005575//cellular_component	GO:0016790//thiolester hydrolase activity;GO:0003674//molecular_function;GO:0016790//thiolester hydrolase activity;GO:0003674//molecular_function	GO:0006637//acyl-CoA metabolic process;GO:0006790//sulfur compound metabolic process;GO:0008150//biological_process;GO:0051186//cofactor metabolic process;GO:0006637//acyl-CoA metabolic process;GO:0006790//sulfur compound metabolic process;GO:0008150//biological_process;GO:0051186//cofactor metabolic process
ENSDARG00000094280	55	5	5.85	0.55	-3.41093	4.28833e-12	4.45405e-10	yes	usp21	-	-	-	-	-
ENSDARG00000068006	733.5	72.5	54.64	5.3	-3.36589	3.62688e-12	3.78212e-10	yes	gck	-	ko01100//Metabolic pathways;ko04910//Insulin signaling pathway;ko00010//Glycolysis / Gluconeogenesis;ko00520//Amino sugar and nucleotide sugar metabolism;ko04930//Type II diabetes mellitus;ko00500//Starch and sucrose metabolism;ko00052//Galactose metabolism;ko04950//Maturity onset diabetes of the young;ko00524//Butirosin and neomycin biosynthesis	GO:0005829//cytosol;GO:0005575//cellular_component;GO:0005622//intracellular;GO:0005623//cell;GO:0005737//cytoplasm;GO:0005829//cytosol	GO:0004340//glucokinase activity;GO:0016301//kinase activity;GO:0000166//nucleotide binding;GO:0016773//phosphotransferase activity, alcohol group as acceptor;GO:0005524//ATP binding;GO:0004396//hexokinase activity;GO:0016740//transferase activity;GO:0003674//molecular_function;GO:0043167//ion binding	GO:0005975//carbohydrate metabolic process;GO:0006096//glycolytic process;GO:0050796//regulation of insulin secretion;GO:0016310//phosphorylation;GO:0001678//cellular glucose homeostasis;GO:0008150//biological_process;GO:0042592//homeostatic process;GO:0006091//generation of precursor metabolites and energy;GO:0009056//catabolic process;GO:0034641//cellular nitrogen compound metabolic process;GO:…
ENSDARG00000039099	1429	158	143.41	15.91	-3.17214	6.19789e-49	4.48831e-46	yes	zgc:113413	zgc:113413 [Source:ZFIN;Acc:ZDB-GENE-050306-5]	-	GO:0005575//cellular_component;GO:0005575//cellular_component;GO:0005575//cellular_component;GO:0005575//cellular_component	GO:0003674//molecular_function;GO:0003674//molecular_function	GO:0008150//biological_process;GO:0008150//biological_process;GO:0008150//biological_process;GO:0008150//biological_process
ENSDARG00000076476	9	1	0.81	0.09	-3.16993	0.00166714	0.025036	yes	zgc:173770	-	-	-	-	-
ENSDARG00000096756	24	3	5.9	0.745	-2.9854	1.66953e-06	7.26621e-05	yes	si:ch211-196c10.13	-	-	-	-	-
ENSDARG00000035602	90	11.5	7.745	0.99	-2.96776	5.79671e-11	5.22908e-09	yes	dao.1	D-amino-acid oxidase, tandem duplicate 1 [Source:ZFIN;Acc:ZDB-GENE-050913-127]	ko01100//Metabolic pathways;ko04146//Peroxisome;ko00330//Arginine and proline metabolism;ko00260//Glycine, serine and threonine metabolism;ko00472//D-Arginine and D-ornithine metabolism	GO:0005575//cellular_component;GO:0005575//cellular_component	GO:0016641//oxidoreductase activity, acting on the CH-NH2 group of donors, oxygen as acceptor;GO:0003884//D-amino-acid oxidase activity;GO:0016491//oxidoreductase activity;GO:0003674//molecular_function	GO:0055114//oxidation-reduction process;GO:0008150//biological_process
ENSDARG00000079525	96	12.5	5.845	0.755	-2.95265	2.09391e-12	2.22809e-10	yes	slc39a5	solute carrier family 39 (zinc transporter), member 5 [Source:ZFIN;Acc:ZDB-GENE-060608-1]	-	GO:0005575//cellular_component	GO:0003674//molecular_function;GO:0022857//transmembrane transporter activity	GO:0006810//transport;GO:0008150//biological_process
XLOC_005607	11	1.5	1.42	0.19	-2.90182	0.00201874	0.0290444	yes	TCONS_00014150	PREDICTED: protein eyes shut homolog [Danio rerio]	-	-	-	-
ENSDARG00000030758	79.5	10.5	6.115	0.82	-2.89866	8.24662e-12	8.36535e-10	yes	guca1c	guanylate cyclase activator 1C [Source:ZFIN;Acc:ZDB-GENE-030829-1]	-	-	GO:0008048//calcium sensitive guanylate cyclase activator activity;GO:0005509//calcium ion binding;GO:0046872//metal ion binding;GO:0030250//guanylate cyclase activator activity;GO:0003674//molecular_function;GO:0030234//enzyme regulator activity;GO:0043167//ion binding	GO:0031284//positive regulation of guanylate cyclase activity;GO:0008150//biological_process
ENSDARG00000098475	918.5	124.5	75.995	10.285	-2.88536	9.01198e-21	1.74031e-18	yes	arr3b	-	ko04010//MAPK signaling pathway;ko04144//Endocytosis;ko04062//Chemokine signaling pathway;ko04744//Phototransduction;ko04740//Olfactory transduction	-	-	-
ENSDARG00000102241	537	73	115.04	15.755	-2.86825	7.78879e-26	2.05105e-23	yes	zgc:136410	zgc:136410 [Source:ZFIN;Acc:ZDB-GENE-060421-6071]	-	-	GO:0030246//carbohydrate binding;GO:0003674//molecular_function	GO:0008150//biological_process;GO:0008150//biological_process
ENSDARG00000098037	32.5	4.5	3.69	0.51	-2.85505	5.27187e-07	2.60421e-05	yes	-	-	-	-	-	-
ENSDARG00000056587	114.5	18.5	9.01	1.255	-2.84384	2.16079e-13	2.58402e-11	yes	cyp2r1	-	ko01100//Metabolic pathways;ko00100//Steroid biosynthesis	GO:0005575//cellular_component;GO:0005622//intracellular;GO:0005623//cell;GO:0005737//cytoplasm	GO:0003674//molecular_function;GO:0016491//oxidoreductase activity;GO:0043167//ion binding	GO:0008150//biological_process;GO:0044281//small molecule metabolic process;GO:0009056//catabolic process
ENSDARG00000101393	802	111.5	296.24	41.43	-2.83802	5.12087e-27	1.46705e-24	yes	C6H17orf67	-	-	-	-	-
ENSDARG00000042221	849	124.5	25.365	3.56	-2.83289	1.58972e-32	6.09472e-30	yes	mthfd1l	-	ko01100//Metabolic pathways;ko00670//One carbon pool by folate	-	GO:0003824//catalytic activity;GO:0004488//methylenetetrahydrofolate dehydrogenase (NADP+) activity;GO:0005524//ATP binding;GO:0004329//formate-tetrahydrofolate ligase activity;GO:0003674//molecular_function;GO:0016874//ligase activity;GO:0043167//ion binding;GO:0016491//oxidoreductase activity	GO:0055114//oxidation-reduction process;GO:0009396//folic acid-containing compound biosynthetic process;GO:0006520//cellular amino acid metabolic process;GO:0008150//biological_process;GO:0009058//biosynthetic process;GO:0034641//cellular nitrogen compound metabolic process;GO:0044281//small molecule metabolic process;GO:0051186//cofactor metabolic process
ENSDARG00000103504	19.5	4	1.34	0.19	-2.81816	0.000148421	0.00354658	yes	-	-	-	-	-	-
ENSDARG00000052138	92.5	13.5	8.03	1.19	-2.75444	3.32471e-13	3.86943e-11	yes	slc1a2a	-	-	GO:0016021//integral component of membrane;GO:0016020//membrane;GO:0005575//cellular_component	GO:0015293//symporter activity;GO:0017153//sodium:dicarboxylate symporter activity;GO:0003674//molecular_function;GO:0022857//transmembrane transporter activity	GO:0006810//transport;GO:0006835//dicarboxylic acid transport;GO:0008150//biological_process
ENSDARG00000038770	73.5	11	16.24	2.57	-2.65971	1.00461e-10	8.81822e-09	yes	zgc:103625	-	-	-	-	-
ENSDARG00000068947	25	4	0.915	0.145	-2.65772	6.08622e-06	0.000227562	yes	si:ch211-264e16.1	-	-	-	-	-
ENSDARG00000102175	48	6.5	10.515	1.675	-2.65022	2.43737e-09	1.83648e-07	yes	hamp	hepcidin antimicrobial peptide [Source:ZFIN;Acc:ZDB-GENE-050726-1]	-	GO:0005576//extracellular region;GO:0005575//cellular_component;GO:0005576//extracellular region;GO:0005575//cellular_component	GO:0001530//lipopolysaccharide binding;GO:0070891//lipoteichoic acid binding;GO:0005179//hormone activity;GO:0042834//peptidoglycan binding;GO:0003674//molecular_function;GO:0008289//lipid binding;GO:0001530//lipopolysaccharide binding;GO:0070891//lipoteichoic acid binding;GO:0005179//hormone activity;GO:0042834//peptidoglycan binding;GO:0003674//molecular_function;GO:0008289//lipid binding	GO:0050830//defense response to Gram-positive bacterium;GO:0042742//defense response to bacterium;GO:0009617//response to bacterium;GO:0050829//defense response to Gram-negative bacterium;GO:0006879//cellular iron ion homeostasis;GO:0008150//biological_process;GO:0042592//homeostatic process;GO:0006950//response to stress;GO:0050830//defense response to Gram-positive bacterium;GO:0042742//defense…
ENSDARG00000068374	22.5	3.5	1.46	0.235	-2.63524	6.76339e-05	0.00180288	yes	si:ch211-132b12.7	-	-	-	-	-
ENSDARG00000056511	2883.5	460	238.965	38.505	-2.63368	1.53035e-39	8.48859e-37	yes	arr3a	arrestin 3a, retinal (X-arrestin) [Source:ZFIN;Acc:ZDB-GENE-040718-102]	ko04010//MAPK signaling pathway;ko04144//Endocytosis;ko04062//Chemokine signaling pathway;ko04744//Phototransduction;ko04740//Olfactory transduction	GO:0005575//cellular_component;GO:0005575//cellular_component	GO:0003674//molecular_function;GO:0003674//molecular_function	GO:0007601//visual perception;GO:0007165//signal transduction;GO:0008150//biological_process;GO:0050877//neurological system process
ENSDARG00000089749	102	17	17.055	2.88	-2.56605	1.55443e-12	1.67657e-10	yes	aqp8b	aquaporin 8b [Source:ZFIN;Acc:ZDB-GENE-080220-47]	-	GO:0016021//integral component of membrane;GO:0016020//membrane;GO:0005887//integral component of plasma membrane;GO:0005575//cellular_component;GO:0005623//cell;GO:0005886//plasma membrane	GO:0015250//water channel activity;GO:0005215//transporter activity;GO:0005372//water transmembrane transporter activity;GO:0015254//glycerol channel activity;GO:0003674//molecular_function;GO:0022857//transmembrane transporter activity	GO:0006810//transport;GO:0055085//transmembrane transport;GO:0009992//cellular water homeostasis;GO:0034220//ion transmembrane transport;GO:0008150//biological_process;GO:0055085//transmembrane transport;GO:0042592//homeostatic process
ENSDARG00000100288	62	18.5	7.215	1.235	-2.54649	1.33144e-05	0.000445579	yes	impg2b	-	-	-	-	-
ENSDARG00000029308	13	2	1.98	0.35	-2.50007	0.00044467	0.00864782	yes	prr15lb	-	-	-	-	-
ENSDARG00000098803	464	82.5	40.66	7.255	-2.48656	6.76106e-24	1.57376e-21	yes	cyp2aa8	-	-	-	-	-
ENSDARG00000058094	295	52.5	14.92	2.685	-2.47425	3.62893e-16	5.31496e-14	yes	ciarta	-	-	-	-	-
ENSDARG00000009637	3129.5	546	225.385	40.6	-2.47284	6.70211e-38	3.56579e-35	yes	zgc:73075	zgc:73075 [Source:ZFIN;Acc:ZDB-GENE-040426-1661]	-	GO:0005575//cellular_component;GO:0005575//cellular_component	GO:0005509//calcium ion binding;GO:0046872//metal ion binding;GO:0003674//molecular_function;GO:0043167//ion binding	-
ENSDARG00000043012	35	6	5.675	1.025	-2.469	9.83329e-06	0.000342261	yes	napgb	N-ethylmaleimide-sensitive factor attachment protein, gamma b [Source:ZFIN;Acc:ZDB-GENE-040718-171]	-	GO:0005774//vacuolar membrane;GO:0031201//SNARE complex;GO:0005575//cellular_component;GO:0005622//intracellular;GO:0005623//cell;GO:0005737//cytoplasm;GO:0043234//protein complex;GO:0005773//vacuole;GO:0043226//organelle	GO:0005483//soluble NSF attachment protein activity;GO:0019905//syntaxin binding;GO:0003674//molecular_function	GO:0006886//intracellular protein transport;GO:0061025//membrane fusion;GO:0008150//biological_process;GO:0061024//membrane organization;GO:0006810//transport
ENSDARG00000045015	16.5	3	1.555	0.285	-2.44788	0.000242574	0.00530085	yes	CYP27B1	-	-	-	-	-
ENSDARG00000034403	61.5	11.5	11.575	2.16	-2.42191	2.24358e-06	9.47977e-05	yes	zgc:173443	zgc:173443 [Source:ZFIN;Acc:ZDB-GENE-071004-101]	-	GO:0005575//cellular_component;GO:0005575//cellular_component	GO:0003674//molecular_function;GO:0003674//molecular_function	GO:0008150//biological_process;GO:0008150//biological_process
ENSDARG00000019763	92	18	15.765	2.955	-2.4155	6.50795e-11	5.85042e-09	yes	acp5a	-	ko04142//Lysosome;ko04380//Osteoclast differentiation;ko05323//Rheumatoid arthritis;ko00740//Riboflavin metabolism	GO:0005575//cellular_component;GO:0005575//cellular_component	GO:0016787//hydrolase activity;GO:0003993//acid phosphatase activity;GO:0003674//molecular_function;GO:0016791//phosphatase activity	-
ENSDARG00000079933	220	42	21.36	4.065	-2.39358	2.94071e-13	3.45697e-11	yes	SLC46A3 (2 of 2)	solute carrier family 46, member 3 [Source:HGNC Symbol;Acc:HGNC:27501]	-	-	-	GO:0006810//transport;GO:0008150//biological_process;GO:0055085//transmembrane transport
ENSDARG00000056652	12.5	2.5	1.08	0.215	-2.32862	0.00383613	0.0465153	yes	SLC22A7 (3 of 5)	-	-	-	-	-
ENSDARG00000087345	73.5	14.5	4.675	0.935	-2.32193	4.57502e-06	0.000177751	yes	CABZ01059415.2	-	-	-	-	-
ENSDARG00000075016	329	67	4.99	1.01	-2.30468	1.02499e-16	1.53572e-14	yes	apobb.2	-	-	-	-	-
ENSDARG00000003732	24.5	3.5	2.065	0.42	-2.29768	2.00355e-06	8.57675e-05	yes	mitfa	microphthalmia-associated transcription factor a [Source:ZFIN;Acc:ZDB-GENE-990910-11]	ko05200//Pathways in cancer;ko04916//Melanogenesis;ko04380//Osteoclast differentiation;ko05218//Melanoma	GO:0005634//nucleus;GO:0005654//nucleoplasm;GO:0005575//cellular_component;GO:0005622//intracellular;GO:0005623//cell;GO:0005654//nucleoplasm;GO:0043226//organelle	GO:0003700//sequence-specific DNA binding transcription factor activity;GO:0000981//sequence-specific DNA binding RNA polymerase II transcription factor activity;GO:0046983//protein dimerization activity;GO:0003674//molecular_function;GO:0001071//nucleic acid binding transcription factor activity	GO:0006351//transcription, DNA-templated;GO:0030318//melanocyte differentiation;GO:0006357//regulation of transcription from RNA polymerase II promoter;GO:0043473//pigmentation;GO:0045670//regulation of osteoclast differentiation;GO:0042981//regulation of apoptotic process;GO:0006355//regulation of transcription, DNA-templated;GO:0008150//biological_process;GO:0002376//immune system process;GO:00…
ENSDARG00000068114	84	18.5	11.595	2.415	-2.26341	3.48022e-08	2.22376e-06	yes	f11r.2	-	-	-	-	-
ENSDARG00000093888	31.5	6.5	11.54	2.43	-2.24762	7.89366e-06	0.00028463	yes	-	-	-	-	-	-
ENSDARG00000020602	1009	217	38.92	8.43	-2.20691	2.53087e-26	6.87289e-24	yes	grk7a	G protein-coupled receptor kinase 7a [Source:ZFIN;Acc:ZDB-GENE-050824-1]	ko04144//Endocytosis;ko04062//Chemokine signaling pathway;ko04744//Phototransduction	GO:0005575//cellular_component	GO:0003674//molecular_function;GO:0016301//kinase activity;GO:0004871//signal transducer activity;GO:0043167//ion binding	GO:0008150//biological_process;GO:0050877//neurological system process;GO:0006464//cellular protein modification process;GO:0007165//signal transduction
ENSDARG00000068551	36.5	5	5.65	1.225	-2.20547	4.20684e-08	2.62374e-06	yes	zgc:153394	zgc:153394 [Source:ZFIN;Acc:ZDB-GENE-060929-240]	-	GO:0016020//membrane;GO:0016021//integral component of membrane;GO:0005575//cellular_component	GO:0016740//transferase activity;GO:0003674//molecular_function	GO:0006629//lipid metabolic process;GO:0006631//fatty acid metabolic process;GO:0006633//fatty acid biosynthetic process;GO:0008150//biological_process;GO:0009058//biosynthetic process;GO:0044281//small molecule metabolic process
ENSDARG00000098890	131	28.5	12.425	2.725	-2.18892	6.64332e-10	5.29637e-08	yes	cyp2aa9	cytochrome P450, family 2, subfamily AA, polypeptide 9 [Source:ZFIN;Acc:ZDB-GENE-080724-3]	-	GO:0043231//intracellular membrane-bounded organelle;GO:0005737//cytoplasm;GO:0005575//cellular_component;GO:0005622//intracellular;GO:0005623//cell;GO:0005737//cytoplasm;GO:0043226//organelle	GO:0046872//metal ion binding;GO:0008392//arachidonic acid epoxygenase activity;GO:0008395//steroid hydroxylase activity;GO:0016705//oxidoreductase activity, acting on paired donors, with incorporation or reduction of molecular oxygen;GO:0020037//heme binding;GO:0005506//iron ion binding;GO:0016491//oxidoreductase activity;GO:0004497//monooxygenase activity;GO:0019825//oxygen binding;GO:0016712//…	GO:0006805//xenobiotic metabolic process;GO:0042738//exogenous drug catabolic process;GO:0055114//oxidation-reduction process;GO:0019369//arachidonic acid metabolic process;GO:0006629//lipid metabolic process;GO:0008150//biological_process;GO:0044281//small molecule metabolic process;GO:0009056//catabolic process
ENSDARG00000091754	50	11	12.365	2.745	-2.17138	4.2559e-07	2.15022e-05	yes	CHCHD5	-	-	-	-	-
ENSDARG00000074160	27	6	5.465	1.22	-2.16334	0.000130767	0.00316831	yes	paqr4b	progestin and adipoQ receptor family member IVb [Source:ZFIN;Acc:ZDB-GENE-121214-338]	-	-	GO:0003674//molecular_function	-
ENSDARG00000010519	222.5	50	5.91	1.34	-2.14093	6.77822e-13	7.55163e-11	yes	per3	period circadian clock 3 [Source:ZFIN;Acc:ZDB-GENE-000804-1]	ko04710//Circadian rhythm - mammal;ko04711//Circadian rhythm - fly	-	GO:0004871//signal transducer activity;GO:0003674//molecular_function	GO:0009648//photoperiodism;GO:0032922//circadian regulation of gene expression;GO:0007165//signal transduction;GO:0008150//biological_process
ENSDARG00000104307	15.5	3.5	1.825	0.415	-2.13671	0.0016837	0.0251975	yes	hoxa1a	homeobox A1a [Source:ZFIN;Acc:ZDB-GENE-000823-5]	-	GO:0005634//nucleus;GO:0005575//cellular_component;GO:0005622//intracellular;GO:0005623//cell;GO:0043226//organelle	GO:0003677//DNA binding;GO:0043565//sequence-specific DNA binding;GO:0003674//molecular_function	GO:0006351//transcription, DNA-templated;GO:0006355//regulation of transcription, DNA-templated;GO:0007275//multicellular organismal development;GO:0008150//biological_process;GO:0009058//biosynthetic process;GO:0034641//cellular nitrogen compound metabolic process
ENSDARG00000074396	242	55	9.29	2.125	-2.12822	1.46034e-14	1.91312e-12	yes	fscn2b	fascin actin-bundling protein 2b, retinal [Source:ZFIN;Acc:ZDB-GENE-040426-1740]	-	GO:0005737//cytoplasm;GO:0005856//cytoskeleton;GO:0005575//cellular_component;GO:0005622//intracellular;GO:0005623//cell;GO:0043226//organelle	GO:0003779//actin binding;GO:0051015//actin filament binding;GO:0030674//protein binding, bridging;GO:0003674//molecular_function;GO:0008092//cytoskeletal protein binding	GO:0030036//actin cytoskeleton organization;GO:0007015//actin filament organization;GO:0007010//cytoskeleton organization;GO:0008150//biological_process
ENSDARG00000099008	34.5	8	1.55	0.36	-2.1062	1.19487e-05	0.000408455	yes	EGFLAM	-	-	-	-	-
ENSDARG00000071475	322	79	9.895	2.305	-2.10193	7.94772e-14	9.9614e-12	yes	aox3	aldehyde oxidase 3 [Source:ZFIN;Acc:ZDB-GENE-001205-2]	ko01100//Metabolic pathways;ko00280//Valine, leucine and isoleucine degradation;ko00380//Tryptophan metabolism;ko00982//Drug metabolism - cytochrome P450;ko00350//Tyrosine metabolism;ko00760//Nicotinate and nicotinamide metabolism;ko00750//Vitamin B6 metabolism	GO:0005737//cytoplasm;GO:0005575//cellular_component;GO:0005622//intracellular;GO:0005623//cell;GO:0005737//cytoplasm	GO:0051536//iron-sulfur cluster binding;GO:0016491//oxidoreductase activity;GO:0046872//metal ion binding;GO:0050660//flavin adenine dinucleotide binding;GO:0003824//catalytic activity;GO:0005506//iron ion binding;GO:0051537//2 iron, 2 sulfur cluster binding;GO:0004854//xanthine dehydrogenase activity;GO:0008762//UDP-N-acetylmuramate dehydrogenase activity;GO:0016614//oxidoreductase activity, act…	GO:0055114//oxidation-reduction process;GO:0008150//biological_process
ENSDARG00000092419	15.5	2	0.9	0.21	-2.09954	5.35532e-05	0.00147739	yes	vtg7	-	-	-	GO:0005319//lipid transporter activity;GO:0003674//molecular_function	GO:0006869//lipid transport;GO:0006810//transport;GO:0008150//biological_process
ENSDARG00000039117	654.5	153.5	44.41	10.44	-2.08876	1.36857e-19	2.51258e-17	yes	tefa	-	-	GO:0005634//nucleus;GO:0005575//cellular_component;GO:0005622//intracellular;GO:0005623//cell;GO:0043226//organelle	GO:0043565//sequence-specific DNA binding;GO:0003700//sequence-specific DNA binding transcription factor activity;GO:0001071//nucleic acid binding transcription factor activity;GO:0003674//molecular_function;GO:0003677//DNA binding	GO:0071482//cellular response to light stimulus;GO:0045893//positive regulation of transcription, DNA-templated;GO:0006355//regulation of transcription, DNA-templated;GO:0006357//regulation of transcription from RNA polymerase II promoter;GO:0008150//biological_process
ENSDARG00000100956	55	13	1.735	0.41	-2.08124	6.07244e-07	2.93708e-05	yes	si:ch211-276i12.4	-	-	-	-	-
ENSDARG00000045904	102.5	24	6.835	1.62	-2.07695	1.09797e-09	8.59583e-08	yes	nr2e3	nuclear receptor subfamily 2, group E, member 3 [Source:ZFIN;Acc:ZDB-GENE-041114-63]	-	GO:0005634//nucleus;GO:0005575//cellular_component;GO:0005622//intracellular;GO:0005623//cell;GO:0043226//organelle	GO:0046872//metal ion binding;GO:0003677//DNA binding;GO:0003700//sequence-specific DNA binding transcription factor activity;GO:0003707//steroid hormone receptor activity;GO:0008270//zinc ion binding;GO:0043565//sequence-specific DNA binding;GO:0004879//ligand-activated sequence-specific DNA binding RNA polymerase II transcription factor activity;GO:0001071//nucleic acid binding transcription fa…	GO:0006351//transcription, DNA-templated;GO:0043401//steroid hormone mediated signaling pathway;GO:0006355//regulation of transcription, DNA-templated;GO:0008150//biological_process;GO:0007165//signal transduction;GO:0009058//biosynthetic process;GO:0034641//cellular nitrogen compound metabolic process
ENSDARG00000043360	15	3.5	6.57	1.57	-2.06513	0.00142107	0.0222116	yes	dph3	diphthamide biosynthesis 3 [Source:ZFIN;Acc:ZDB-GENE-050522-545]	-	-	GO:0003674//molecular_function;GO:0003674//molecular_function	-
ENSDARG00000101164	59	14	4.15	0.995	-2.06034	8.47944e-07	3.98304e-05	yes	NANS (2 of 2)	-	-	-	-	-
ENSDARG00000097054	16.5	4	2.955	0.715	-2.04714	0.00148693	0.0229823	yes	-	-	-	-	-	-
ENSDARG00000087318	85	20.5	9.805	2.395	-2.03349	2.1218e-08	1.40752e-06	yes	zgc:174688	zgc:174688 [Source:ZFIN;Acc:ZDB-GENE-071004-126]	-	GO:0005575//cellular_component;GO:0005575//cellular_component	GO:0003674//molecular_function;GO:0003674//molecular_function	GO:0008150//biological_process;GO:0008150//biological_process
ENSDARG00000045269	51.5	12.5	9.5	2.345	-2.01834	1.97106e-05	0.000634389	yes	PTS	-	-	-	-	-
ENSDARG00000056617	28.5	7	0.7	0.175	-2	0.00289596	0.0377396	yes	rpgra	-	-	-	-	-
ENSDARG00000076872	86	25	13.42	3.355	-2	2.43892e-07	1.3056e-05	yes	MPP4 (2 of 2)	-	-	-	-	-
ENSDARG00000102260	16	4	0.915	0.23	-1.99214	0.00204542	0.0292668	yes	TMPRSS6	-	-	-	-	-
ENSDARG00000009594	780.5	200.5	51.04	12.875	-1.98706	8.79974e-14	1.08725e-11	yes	nr1d2b	nuclear receptor subfamily 1, group D, member 2b [Source:ZFIN;Acc:ZDB-GENE-990415-244]	-	GO:0005634//nucleus;GO:0005575//cellular_component;GO:0005622//intracellular;GO:0005623//cell;GO:0043226//organelle	GO:0003677//DNA binding;GO:0043565//sequence-specific DNA binding;GO:0003700//sequence-specific DNA binding transcription factor activity;GO:0003707//steroid hormone receptor activity;GO:0008270//zinc ion binding;GO:0046872//metal ion binding;GO:0003674//molecular_function;GO:0043167//ion binding;GO:0004871//signal transducer activity;GO:0001071//nucleic acid binding transcription factor activity	GO:0006355//regulation of transcription, DNA-templated;GO:0006351//transcription, DNA-templated;GO:0043401//steroid hormone mediated signaling pathway;GO:0007165//signal transduction;GO:0008150//biological_process;GO:0009058//biosynthetic process;GO:0034641//cellular nitrogen compound metabolic process
ENSDARG00000062632	16	4	0.395	0.1	-1.98185	0.00335831	0.0421122	yes	duox	dual oxidase [Source:ZFIN;Acc:ZDB-GENE-091117-14]	-	GO:0005575//cellular_component	GO:0003674//molecular_function;GO:0016491//oxidoreductase activity	GO:0008150//biological_process;GO:0009058//biosynthetic process;GO:0006950//response to stress;GO:0002376//immune system process;GO:0040011//locomotion;GO:0048870//cell motility
ENSDARG00000045737	36	9	7.07	1.795	-1.97773	3.30692e-05	0.000981907	yes	guca1g	guanylate cyclase activator 1g [Source:ZFIN;Acc:ZDB-GENE-050120-1]	-	-	GO:0005509//calcium ion binding;GO:0008048//calcium sensitive guanylate cyclase activator activity;GO:0030250//guanylate cyclase activator activity;GO:0046872//metal ion binding;GO:0003674//molecular_function;GO:0043167//ion binding;GO:0030234//enzyme regulator activity	GO:0031284//positive regulation of guanylate cyclase activity;GO:0008150//biological_process
ENSDARG00000056028	315.5	81	21.675	5.575	-1.95899	5.25336e-14	6.68073e-12	yes	slc22a7a	solute carrier family 22 (organic anion transporter), member 7a [Source:ZFIN;Acc:ZDB-GENE-050506-52]	-	GO:0016021//integral component of membrane;GO:0016020//membrane;GO:0005575//cellular_component	GO:0022857//transmembrane transporter activity;GO:0003674//molecular_function	GO:0055085//transmembrane transport;GO:0006810//transport;GO:0008150//biological_process
ENSDARG00000012126	210.5	53.5	14.93	3.845	-1.95716	1.07869e-11	1.06926e-09	yes	zgc:109965	zgc:109965 [Source:ZFIN;Acc:ZDB-GENE-050913-21]	-	GO:0016020//membrane;GO:0005575//cellular_component	-	GO:0009966//regulation of signal transduction;GO:0008150//biological_process
ENSDARG00000075264	53.5	15.5	3.475	0.9	-1.94902	9.40007e-06	0.000329825	yes	FAM124A	-	-	-	-	-
ENSDARG00000054911	316.5	82	45.55	11.885	-1.93831	2.04904e-08	1.36272e-06	yes	tmsb	thymosin, beta [Source:ZFIN;Acc:ZDB-GENE-050307-5]	ko04810//Regulation of actin cytoskeleton	GO:0005575//cellular_component;GO:0005622//intracellular;GO:0005623//cell;GO:0005737//cytoplasm;GO:0005856//cytoskeleton;GO:0043226//organelle	GO:0003674//molecular_function;GO:0008092//cytoskeletal protein binding	GO:0007010//cytoskeleton organization;GO:0008150//biological_process
ENSDARG00000029894	65	17	5.655	1.485	-1.92906	1.38307e-06	6.16352e-05	yes	slc2a15a	solute carrier family 2 (facilitated glucose transporter), member 15a [Source:ZFIN;Acc:ZDB-GENE-060531-109]	-	GO:0016021//integral component of membrane;GO:0016020//membrane;GO:0005887//integral component of plasma membrane;GO:0005575//cellular_component;GO:0005623//cell;GO:0005886//plasma membrane	GO:0005355//glucose transmembrane transporter activity;GO:0005215//transporter activity;GO:0005351//sugar:proton symporter activity;GO:0022857//transmembrane transporter activity;GO:0022891//substrate-specific transmembrane transporter activity;GO:0003674//molecular_function	GO:0046323//glucose import;GO:0055085//transmembrane transport;GO:0035428//hexose transmembrane transport;GO:0006810//transport;GO:0008150//biological_process
ENSDARG00000063288	203.5	56.5	20.915	5.525	-1.92049	5.23789e-09	3.77215e-07	yes	slc2a11b	-	-	GO:0016021//integral component of membrane;GO:0016020//membrane;GO:0005887//integral component of plasma membrane;GO:0005575//cellular_component;GO:0005623//cell;GO:0005886//plasma membrane	GO:0005215//transporter activity;GO:0022857//transmembrane transporter activity;GO:0005355//glucose transmembrane transporter activity;GO:0005351//sugar:proton symporter activity;GO:0022891//substrate-specific transmembrane transporter activity;GO:0003674//molecular_function	GO:0055085//transmembrane transport;GO:0046323//glucose import;GO:0035428//hexose transmembrane transport;GO:0006810//transport;GO:0008150//biological_process
ENSDARG00000075295	226	58.5	24.345	6.445	-1.91737	1.41806e-09	1.097e-07	yes	tulp1a	-	-	-	-	-
ENSDARG00000032242	201	53	14.71	3.915	-1.90971	9.15612e-11	8.11905e-09	yes	tnnt2c	troponin T2c, cardiac [Source:ZFIN;Acc:ZDB-GENE-030520-1]	-	GO:0005861//troponin complex;GO:0005575//cellular_component;GO:0005622//intracellular;GO:0005623//cell;GO:0005737//cytoplasm;GO:0005856//cytoskeleton;GO:0043226//organelle;GO:0043234//protein complex	-	GO:0045214//sarcomere organization;GO:0006937//regulation of muscle contraction;GO:0008150//biological_process;GO:0007010//cytoskeleton organization;GO:0022607//cellular component assembly;GO:0030154//cell differentiation;GO:0048646//anatomical structure formation involved in morphogenesis;GO:0048856//anatomical structure development
ENSDARG00000030357	34	10.5	3.8	1.015	-1.90452	0.000203643	0.00457276	yes	zgc:66313	zgc:66313 [Source:ZFIN;Acc:ZDB-GENE-040426-1606]	ko01100//Metabolic pathways;ko04972//Pancreatic secretion;ko04970//Salivary secretion;ko04973//Carbohydrate digestion and absorption;ko00500//Starch and sucrose metabolism	-	GO:0016798//hydrolase activity, acting on glycosyl bonds;GO:0043169//cation binding;GO:0003824//catalytic activity;GO:0016787//hydrolase activity;GO:0004556//alpha-amylase activity;GO:0003674//molecular_function;GO:0043167//ion binding	GO:0005975//carbohydrate metabolic process;GO:0071391//cellular response to estrogen stimulus;GO:0008152//metabolic process;GO:0008150//biological_process
ENSDARG00000016999	10.5	2	1.695	0.455	-1.89735	0.00407377	0.0486278	yes	lin28a	-	-	GO:0005575//cellular_component;GO:0005622//intracellular;GO:0005623//cell;GO:0005737//cytoplasm;GO:0043226//organelle;GO:0005634//nucleus	GO:0003674//molecular_function;GO:0043167//ion binding;GO:0003723//RNA binding	GO:0008150//biological_process;GO:0009790//embryo development;GO:0048856//anatomical structure development;GO:0034641//cellular nitrogen compound metabolic process;GO:0008283//cell proliferation;GO:0030154//cell differentiation;GO:0009056//catabolic process;GO:0034655
ENSDARG00000104710	60	16	5.49	1.475	-1.89609	6.13666e-05	0.00166302	yes	psip1	PC4 and SFRS1 interacting protein 1 [Source:ZFIN;Acc:ZDB-GENE-050522-104]	-	-	GO:0003674//molecular_function;GO:0003674//molecular_function	GO:0008150//biological_process;GO:0008150//biological_process
ENSDARG00000045254	62	16.5	8.72	2.345	-1.89474	5.92014e-06	0.000224329	yes	C7orf50	-	-	-	-	-
ENSDARG00000059053	450.5	148	34.39	9.37	-1.87587	5.5741e-11	5.05393e-09	yes	slc13a4	solute carrier family 13 (sodium/sulfate symporter), member 4 [Source:ZFIN;Acc:ZDB-GENE-070424-71]	-	GO:0016020//membrane;GO:0005575//cellular_component	GO:0005215//transporter activity;GO:0003674//molecular_function	GO:0006814//sodium ion transport;GO:0055085//transmembrane transport;GO:0006810//transport;GO:0008150//biological_process
ENSDARG00000069435	16	4.5	0.695	0.19	-1.87101	0.00301183	0.0390014	yes	cfap58	cilia and flagella associated protein 58 [Source:ZFIN;Acc:ZDB-GENE-060929-128]	-	GO:0005575//cellular_component;GO:0005575//cellular_component	GO:0003674//molecular_function;GO:0003674//molecular_function	GO:0008150//biological_process;GO:0008150//biological_process
ENSDARG00000019949	1058	298.5	99.42	27.31	-1.86411	2.31681e-18	3.82274e-16	yes	serpinh1b	-	-	-	-	-
XLOC_026076	15	4	11.885	3.27	-1.86178	0.00363046	0.0445603	yes	TCONS_00062002	-	-	-	-	-
ENSDARG00000078520	162	50.5	10.83	2.99	-1.85682	7.49147e-06	0.000272389	yes	ikbip	-	-	-	-	-
ENSDARG00000075948	43	12	2.44	0.68	-1.84327	2.04757e-05	0.00065417	yes	slco4a1	-	-	-	-	-
ENSDARG00000087311	35.5	10	3.705	1.04	-1.83289	8.88444e-05	0.00226853	yes	zgc:171951	-	-	-	-	-
ENSDARG00000039747	40	11.5	6.28	1.77	-1.82702	6.97065e-05	0.00185056	yes	-	-	-	-	-	-
ENSDARG00000042780	4228.5	1206.5	38.405	10.855	-1.82293	1.58389e-10	1.36277e-08	yes	apoba	apolipoprotein Ba [Source:ZFIN;Acc:ZDB-GENE-070702-4]	-	GO:0005575//cellular_component;GO:0005622//intracellular;GO:0005623//cell;GO:0005737//cytoplasm;GO:0005783//endoplasmic reticulum;GO:0043226//organelle	GO:0003674//molecular_function	GO:0006810//transport;GO:0008150//biological_process;GO:0006629//lipid metabolic process
ENSDARG00000044676	34	9.5	7.825	2.235	-1.80782	0.000298797	0.00629208	yes	GADD45G (3 of 3)	-	-	-	-	-
ENSDARG00000019498	30	8.5	1.71	0.49	-1.80314	0.000463264	0.0089263	yes	cry5	cryptochrome 5 [Source:ZFIN;Acc:ZDB-GENE-010426-8]	-	-	GO:0003913//DNA photolyase activity;GO:0003914//DNA (6-4) photolyase activity;GO:0016829//lyase activity;GO:0003674//molecular_function	GO:0006281//DNA repair;GO:0009416//response to light stimulus;GO:0008150//biological_process;GO:0006259//DNA metabolic process;GO:0006950//response to stress;GO:0034641//cellular nitrogen compound metabolic process
ENSDARG00000033539	2044.5	609	145.015	41.845	-1.79307	1.23148e-14	1.62968e-12	yes	paics	-	ko01100//Metabolic pathways;ko00230//Purine metabolism	-	GO:0005524//ATP binding;GO:0004639//phosphoribosylaminoimidazolesuccinocarboxamide synthase activity;GO:0003674//molecular_function;GO:0016874//ligase activity;GO:0043167//ion binding;GO:0005524//ATP binding;GO:0004639//phosphoribosylaminoimidazolesuccinocarboxamide synthase activity;GO:0003674//molecular_function;GO:0016874//ligase activity;GO:0043167//ion binding;GO:0005524//ATP binding;GO:0004…	GO:0060041//retina development in camera-type eye;GO:0043009//chordate embryonic development;GO:0043473//pigmentation;GO:0006164//purine nucleotide biosynthetic process;GO:0043010//camera-type eye development;GO:0006189//'de novo' IMP biosynthetic process;GO:0008150//biological_process;GO:0009058//biosynthetic process;GO:0034641//cellular nitrogen compound metabolic process;GO:0044281//small mole…
ENSDARG00000100397	2486.5	725.5	85.83	24.985	-1.78042	5.45788e-20	1.03106e-17	yes	pde6c	-	ko00230//Purine metabolism	-	GO:0016787//hydrolase activity;GO:0004114//3',5'-cyclic-nucleotide phosphodiesterase activity;GO:0008081//phosphoric diester hydrolase activity;GO:0046872//metal ion binding;GO:0003674//molecular_function;GO:0043167//ion binding	GO:0045494//photoreceptor cell maintenance;GO:0060059//embryonic retina morphogenesis in camera-type eye;GO:0007165//signal transduction;GO:0008150//biological_process;GO:0009790//embryo development;GO:0048856//anatomical structure development;GO:0042592//homeostatic process
ENSDARG00000103271	3858.5	1124.5	224.375	65.485	-1.77668	2.80042e-17	4.31994e-15	yes	pla2g15	-	-	-	-	-
XLOC_018434	21	6	1.37	0.4	-1.7761	0.00183859	0.027034	yes	TCONS_00045451	PREDICTED: ataxin-1-like isoform X1 [Maylandia zebra]	-	GO:0031981//nuclear lumen	GO:0005515//protein binding;GO:0003723//RNA binding	GO:0044237//cellular metabolic process;GO:0050896//response to stimulus;GO:0048523//negative regulation of cellular process
ENSDARG00000057652	77	28	3.385	0.99	-1.77366	0.00040938	0.00811599	yes	dbpb	D site albumin promoter binding protein b [Source:ZFIN;Acc:ZDB-GENE-100922-6]	-	-	GO:0043565//sequence-specific DNA binding;GO:0003700//sequence-specific DNA binding transcription factor activity;GO:0001071//nucleic acid binding transcription factor activity;GO:0003674//molecular_function;GO:0003677//DNA binding	GO:0006355//regulation of transcription, DNA-templated;GO:0008150//biological_process
ENSDARG00000053097	250	75.5	19.62	5.815	-1.75447	8.05768e-10	6.38491e-08	yes	hsf2	-	-	GO:0005634//nucleus;GO:0005575//cellular_component;GO:0005622//intracellular;GO:0005623//cell;GO:0043226//organelle	GO:0003700//sequence-specific DNA binding transcription factor activity;GO:0043565//sequence-specific DNA binding;GO:0003677//DNA binding;GO:0003674//molecular_function;GO:0001071//nucleic acid binding transcription factor activity	GO:0006357//regulation of transcription from RNA polymerase II promoter;GO:0006355//regulation of transcription, DNA-templated;GO:0008150//biological_process
ENSDARG00000089063	112	30	9.63	2.855	-1.75405	2.76344e-08	1.80107e-06	yes	lactbl1a	-	-	-	-	-
ENSDARG00000078052	111.5	32.5	11.485	3.41	-1.75191	6.12816e-08	3.70676e-06	yes	emilin3a	-	-	-	-	-
ENSDARG00000088171	32.5	9.5	5.87	1.745	-1.75013	0.000117638	0.00287694	yes	ciartb	-	-	-	-	-
ENSDARG00000016718	95.5	28.5	8.72	2.62	-1.73476	1.80475e-07	9.8844e-06	yes	mmp11b	matrix metallopeptidase 11b [Source:ZFIN;Acc:ZDB-GENE-070817-2]	-	GO:0005575//cellular_component	GO:0003674//molecular_function;GO:0043167//ion binding;GO:0008233//peptidase activity	GO:0008150//biological_process
ENSDARG00000043902	75.5	22	8.015	2.41	-1.73367	6.02619e-06	0.000226373	yes	gabrr1	gamma-aminobutyric acid (GABA) A receptor, rho 1 [Source:ZFIN;Acc:ZDB-GENE-040724-212]	-	GO:0005886//plasma membrane;GO:0016020//membrane;GO:0030054//cell junction;GO:0016021//integral component of membrane;GO:0045202//synapse;GO:0005575//cellular_component;GO:0005623//cell	GO:0005230//extracellular ligand-gated ion channel activity;GO:0003674//molecular_function;GO:0022857//transmembrane transporter activity	GO:0006811//ion transport;GO:0006810//transport;GO:0008150//biological_process
ENSDARG00000101089	401.5	120.5	20.86	6.29	-1.72961	8.07348e-14	1.00706e-11	yes	GART	-	-	-	-	-
ENSDARG00000024746	1334.5	406.5	69.295	20.975	-1.72408	5.81637e-16	8.42405e-14	yes	hsp90aa1.2	-	ko05200//Pathways in cancer;ko04141//Protein processing in endoplasmic reticulum;ko05215//Prostate cancer;ko04914//Progesterone-mediated oocyte maturation;ko04621//NOD-like receptor signaling pathway;ko04612//Antigen processing and presentation	-	GO:0005515//protein binding;GO:0051082//unfolded protein binding;GO:0005524//ATP binding;GO:0003674//molecular_function;GO:0043167//ion binding	GO:0006950//response to stress;GO:0006457//protein folding;GO:0008150//biological_process
ENSDARG00000071394	30	9	5.285	1.61	-1.71484	0.000897961	0.0151798	yes	foxq2	forkhead box Q2 [Source:ZFIN;Acc:ZDB-GENE-050208-663]	-	GO:0005634//nucleus;GO:0005575//cellular_component;GO:0005622//intracellular;GO:0005623//cell;GO:0043226//organelle	GO:0003677//DNA binding;GO:0000981//sequence-specific DNA binding RNA polymerase II transcription factor activity;GO:0043565//sequence-specific DNA binding;GO:0003700//sequence-specific DNA binding transcription factor activity;GO:0001071//nucleic acid binding transcription factor activity;GO:0003674//molecular_function	GO:0006351//transcription, DNA-templated;GO:0006357//regulation of transcription from RNA polymerase II promoter;GO:0009653//anatomical structure morphogenesis;GO:0006355//regulation of transcription, DNA-templated;GO:0030154//cell differentiation;GO:0008150//biological_process;GO:0030154//cell differentiation;GO:0048856//anatomical structure development;GO:0009058//biosynthetic process;GO:003464…
ENSDARG00000002396	123	37.5	8.32	2.555	-1.70326	9.23342e-08	5.37311e-06	yes	cry-dash	-	-	-	-	-
ENSDARG00000102501	33	10	6.485	2.015	-1.68633	0.000497368	0.00943009	yes	hoxa5a	homeobox A5a [Source:ZFIN;Acc:ZDB-GENE-000823-9]	-	GO:0005634//nucleus;GO:0005575//cellular_component;GO:0005622//intracellular;GO:0005623//cell;GO:0043226//organelle	GO:0003677//DNA binding;GO:0043565//sequence-specific DNA binding;GO:0003700//sequence-specific DNA binding transcription factor activity;GO:0001071//nucleic acid binding transcription factor activity;GO:0003674//molecular_function	GO:0006351//transcription, DNA-templated;GO:0006355//regulation of transcription, DNA-templated;GO:0007275//multicellular organismal development;GO:0008150//biological_process;GO:0009058//biosynthetic process;GO:0034641//cellular nitrogen compound metabolic process
ENSDARG00000056160	2746	861	146.31	45.875	-1.67325	1.94066e-18	3.24313e-16	yes	hspd1	-	ko05152//Tuberculosis;ko03018//RNA degradation;ko04940//Type I diabetes mellitus	GO:0005737//cytoplasm;GO:0005759//mitochondrial matrix;GO:0005575//cellular_component;GO:0005622//intracellular;GO:0005623//cell;GO:0005739//mitochondrion;GO:0043226//organelle	GO:0005524//ATP binding;GO:0000166//nucleotide binding;GO:0003674//molecular_function;GO:0043167//ion binding	GO:0042246//tissue regeneration;GO:0006457//protein folding;GO:0031101//fin regeneration;GO:0042026//protein refolding;GO:0008150//biological_process;GO:0006950//response to stress;GO:0040007//growth;GO:0048856//anatomical structure development
ENSDARG00000013134	27	8.5	3.955	1.255	-1.65599	0.00124797	0.0199354	yes	CABZ01071407.1	Uncharacterized protein [Source:UniProtKB/TrEMBL;Acc:E7F4U2]	-	GO:0016021//integral component of membrane;GO:0005575//cellular_component	-	-
ENSDARG00000035257	81	25.5	11.905	3.78	-1.65511	1.38732e-05	0.000463092	yes	akr1a1a	aldo-keto reductase family 1, member A1a (aldehyde reductase) [Source:ZFIN;Acc:ZDB-GENE-040808-44]	ko01100//Metabolic pathways;ko00010//Glycolysis / Gluconeogenesis;ko00561//Glycerolipid metabolism	GO:0005575//cellular_component;GO:0005575//cellular_component	GO:0003674//molecular_function;GO:0016491//oxidoreductase activity;GO:0003674//molecular_function;GO:0016491//oxidoreductase activity	GO:0008150//biological_process;GO:0008150//biological_process
ENSDARG00000063518	399	127	24.195	7.695	-1.65272	5.54404e-11	5.0536e-09	yes	CPN2	carboxypeptidase N, polypeptide 2 [Source:HGNC Symbol;Acc:HGNC:2313]	-	GO:0005575//cellular_component;GO:0005575//cellular_component	-	GO:0008150//biological_process;GO:0008150//biological_process
ENSDARG00000102967	32	10	9.045	2.885	-1.64855	0.0013766	0.0216193	yes	-	-	-	-	-	-
ENSDARG00000037961	501.5	160	47.545	15.18	-1.64712	7.79718e-10	6.19733e-08	yes	rcn3	-	-	-	GO:0005509//calcium ion binding;GO:0003674//molecular_function;GO:0043167//ion binding	-
ENSDARG00000026820	580	187	17.82	5.775	-1.6256	1.98278e-14	2.57169e-12	yes	gc3	guanylyl cyclase 3 [Source:ZFIN;Acc:ZDB-GENE-011128-9]	-	GO:0016020//membrane;GO:0016021//integral component of membrane;GO:0005575//cellular_component	GO:0016849//phosphorus-oxygen lyase activity;GO:0004672//protein kinase activity;GO:0016829//lyase activity;GO:0005524//ATP binding;GO:0004383//guanylate cyclase activity;GO:0000166//nucleotide binding;GO:0016772//transferase activity, transferring phosphorus-containing groups;GO:0003674//molecular_function;GO:0043167//ion binding;GO:0016301//kinase activity	GO:0006182//cGMP biosynthetic process;GO:0006468//protein phosphorylation;GO:0035556//intracellular signal transduction;GO:0009190//cyclic nucleotide biosynthetic process;GO:0008150//biological_process;GO:0009058//biosynthetic process;GO:0034641//cellular nitrogen compound metabolic process;GO:0044281//small molecule metabolic process;GO:0007165//signal transduction;GO:0006464//cellular protein m…
ENSDARG00000091558	43	14	8.2	2.66	-1.6242	8.74909e-05	0.00223616	yes	si:ch211-251f6.7	si:ch211-251f6.7 [Source:ZFIN;Acc:ZDB-GENE-091113-57]	-	GO:0005575//cellular_component;GO:0005622//intracellular;GO:0005623//cell;GO:0005737//cytoplasm;GO:0005764//lysosome;GO:0005773//vacuole;GO:0043226//organelle	GO:0003674//molecular_function;GO:0008289//lipid binding;GO:0043167//ion binding	GO:0006914//autophagy;GO:0006950//response to stress;GO:0008150//biological_process;GO:0009056//catabolic process;GO:0061024//membrane organization
ENSDARG00000079795	44	14	13.755	4.465	-1.62322	8.05327e-05	0.00209112	yes	VSTM5	-	-	-	-	-
ENSDARG00000000887	33	11.5	5.795	1.885	-1.62024	0.000640639	0.011552	yes	GTSF1 (1 of 2)	-	-	GO:0005575//cellular_component;GO:0005575//cellular_component	-	-
ENSDARG00000098058	748	240.5	231.565	75.385	-1.61907	2.73103e-11	2.59847e-09	yes	im:7150988	-	-	-	-	-
ENSDARG00000012563	102	33	8.78	2.87	-1.61317	5.0932e-07	2.53825e-05	yes	pdss2	prenyl (decaprenyl) diphosphate synthase, subunit 2 [Source:ZFIN;Acc:ZDB-GENE-040718-43]	ko00900//Terpenoid backbone biosynthesis	GO:0005575//cellular_component;GO:0005575//cellular_component	-	GO:0008299//isoprenoid biosynthetic process;GO:0006629//lipid metabolic process;GO:0008150//biological_process;GO:0009058//biosynthetic process
ENSDARG00000069030	93.5	30.5	4.49	1.48	-1.60112	7.1666e-05	0.00188911	yes	skor1a	-	-	GO:0005634//nucleus;GO:0005737//cytoplasm;GO:0005575//cellular_component;GO:0005622//intracellular;GO:0005623//cell;GO:0005737//cytoplasm;GO:0005634//nucleus;GO:0043226//organelle	GO:0046332//SMAD binding;GO:0003714//transcription corepressor activity;GO:0000988//protein binding transcription factor activity;GO:0003674//molecular_function	GO:0000122//negative regulation of transcription from RNA polymerase II promoter;GO:0030514//negative regulation of BMP signaling pathway;GO:0030512//negative regulation of transforming growth factor beta receptor signaling pathway;GO:0008150//biological_process
ENSDARG00000044402	156.5	51.5	31.135	10.37	-1.58612	4.84353e-06	0.000186791	yes	nop16	NOP16 nucleolar protein homolog (yeast) [Source:ZFIN;Acc:ZDB-GENE-040718-267]	-	GO:0005575//cellular_component;GO:0005622//intracellular;GO:0005623//cell;GO:0005634//nucleus;GO:0005730//nucleolus;GO:0043226//organelle	-	GO:0008150//biological_process;GO:0042254//ribosome biogenesis
ENSDARG00000017251	24.5	8	5.085	1.7	-1.58071	0.00166292	0.0249869	yes	smtlb	somatolactin beta [Source:ZFIN;Acc:ZDB-GENE-060123-1]	-	GO:0005576//extracellular region;GO:0005575//cellular_component	GO:0005179//hormone activity;GO:0003674//molecular_function	GO:0043434//response to peptide hormone;GO:0051877//pigment granule aggregation in cell center;GO:0008150//biological_process;GO:0043473//pigmentation
ENSDARG00000069607	77.5	26	6.85	2.305	-1.57134	8.76457e-06	0.000311002	yes	SUSD3 (2 of 2)	sushi domain containing 3 [Source:HGNC Symbol;Acc:HGNC:28391]	-	GO:0005575//cellular_component;GO:0005575//cellular_component	GO:0003674//molecular_function;GO:0003674//molecular_function	GO:0008150//biological_process;GO:0008150//biological_process
ENSDARG00000104814	3532.5	1183	674.59	228.05	-1.56466	1.59481e-15	2.23531e-13	yes	wu:fc46h12	-	-	-	-	-
ENSDARG00000007480	138.5	46.5	11.31	3.825	-1.56407	1.5898e-07	8.81833e-06	yes	rpe65a	retinal pigment epithelium-specific protein 65a [Source:ZFIN;Acc:ZDB-GENE-040426-1717]	-	GO:0005575//cellular_component;GO:0005623//cell;GO:0005886//plasma membrane;GO:0005622//intracellular;GO:0005737//cytoplasm	GO:0003674//molecular_function;GO:0043167//ion binding	GO:0008150//biological_process;GO:0050877//neurological system process
ENSDARG00000053448	563.5	189	103.745	35.105	-1.56329	3.5554e-12	3.72246e-10	yes	si:ch211-251f6.6	si:ch211-251f6.6 [Source:ZFIN;Acc:ZDB-GENE-030131-3219]	-	GO:0005765//lysosomal membrane;GO:0000421//autophagic vacuole membrane;GO:0005575//cellular_component;GO:0005622//intracellular;GO:0005623//cell;GO:0005737//cytoplasm;GO:0005773//vacuole;GO:0043226//organelle;GO:0005764//lysosome	GO:0032266//phosphatidylinositol-3-phosphate binding;GO:0003674//molecular_function;GO:0008289//lipid binding;GO:0043167//ion binding	GO:0000046//autophagic vacuole fusion;GO:0006914//autophagy;GO:0006950//response to stress;GO:0008150//biological_process;GO:0009056//catabolic process;GO:0061024//membrane organization
ENSDARG00000059857	34	13.5	6.05	2.055	-1.5578	0.00333952	0.0419257	yes	blvra	biliverdin reductase A [Source:ZFIN;Acc:ZDB-GENE-060929-312]	ko00860//Porphyrin and chlorophyll metabolism	GO:0005737//cytoplasm;GO:0005575//cellular_component;GO:0005622//intracellular;GO:0005623//cell	GO:0004074//biliverdin reductase activity;GO:0008270//zinc ion binding;GO:0016491//oxidoreductase activity;GO:0003674//molecular_function;GO:0043167//ion binding	GO:0042167//heme catabolic process;GO:0055114//oxidation-reduction process;GO:0008150//biological_process;GO:0009056//catabolic process;GO:0034641//cellular nitrogen compound metabolic process;GO:0051186//cofactor metabolic process
ENSDARG00000102393	206	69.5	12.67	4.305	-1.55733	2.90809e-08	1.88124e-06	yes	arl3l1	ADP-ribosylation factor-like 3, like 1 [Source:ZFIN;Acc:ZDB-GENE-040426-1649]	-	GO:0005622//intracellular;GO:0005575//cellular_component;GO:0005623//cell	GO:0005525//GTP binding;GO:0000166//nucleotide binding;GO:0003674//molecular_function;GO:0043167//ion binding	GO:0048841//regulation of axon extension involved in axon guidance;GO:0007264//small GTPase mediated signal transduction;GO:0007165//signal transduction;GO:0008150//biological_process;GO:0030154//cell differentiation;GO:0048856//anatomical structure development
ENSDARG00000018530	31	10.5	3.735	1.27	-1.55628	0.00162982	0.0245888	yes	mapkapk2b	mitogen-activated protein kinase-activated protein kinase 2b [Source:ZFIN;Acc:ZDB-GENE-071018-1]	-	GO:0005634//nucleus;GO:0005737//cytoplasm;GO:0005575//cellular_component;GO:0005622//intracellular;GO:0005623//cell;GO:0005737//cytoplasm;GO:0005634//nucleus;GO:0043226//organelle	GO:0016740//transferase activity;GO:0051019//mitogen-activated protein kinase binding;GO:0009931//calcium-dependent protein serine/threonine kinase activity;GO:0004672//protein kinase activity;GO:0005524//ATP binding;GO:0016301//kinase activity;GO:0000166//nucleotide binding;GO:0005516//calmodulin binding;GO:0016772//transferase activity, transferring phosphorus-containing groups;GO:0004871//sign…	GO:0006954//inflammatory response;GO:0035924//cellular response to vascular endothelial growth factor stimulus;GO:0034097//response to cytokine;GO:0048010//vascular endothelial growth factor receptor signaling pathway;GO:0002224//toll-like receptor signaling pathway;GO:0006468//protein phosphorylation;GO:0018105//peptidyl-serine phosphorylation;GO:0016310//phosphorylation;GO:0046777//protein auto…
ENSDARG00000029071	136.5	47.5	17.105	5.825	-1.55409	2.26964e-06	9.55889e-05	yes	creld2	cysteine-rich with EGF-like domains 2 [Source:ZFIN;Acc:ZDB-GENE-040426-1626]	-	GO:0005575//cellular_component;GO:0005576//extracellular region;GO:0005622//intracellular;GO:0005623//cell;GO:0005737//cytoplasm;GO:0005783//endoplasmic reticulum;GO:0043226//organelle	-	-
ENSDARG00000071651	26.5	9	3.52	1.2	-1.55254	0.00138219	0.0216809	yes	si:dkey-19a16.13	-	-	-	-	-
ENSDARG00000036832	36485	12459	4360.34	1490.81	-1.54834	1.00856e-12	1.11412e-10	yes	cyt1l	-	-	GO:0005882//intermediate filament;GO:0005575//cellular_component;GO:0005622//intracellular;GO:0005623//cell;GO:0005856//cytoskeleton;GO:0043226//organelle;GO:0043234//protein complex	GO:0005198//structural molecule activity;GO:0003674//molecular_function	-
ENSDARG00000071097	68.5	24	4.93	1.695	-1.5403	4.64472e-05	0.00131047	yes	si:ch73-367f21.4	-	-	-	GO:0001071//nucleic acid binding transcription factor activity;GO:0003674//molecular_function	GO:0008150//biological_process
ENSDARG00000071601	899	307	207.6	71.41	-1.53961	6.571e-10	5.25478e-08	yes	pvalb9	parvalbumin 9 [Source:ZFIN;Acc:ZDB-GENE-030805-4]	-	-	GO:0046872//metal ion binding;GO:0005509//calcium ion binding;GO:0003674//molecular_function;GO:0043167//ion binding	-
ENSDARG00000070477	168.5	54	13.27	4.575	-1.53632	9.22207e-08	5.37311e-06	yes	dnajc2	-	-	GO:0005575//cellular_component;GO:0005622//intracellular;GO:0005623//cell;GO:0005634//nucleus;GO:0043226//organelle;GO:0005737//cytoplasm;GO:0005829//cytosol	GO:0003674//molecular_function;GO:0032182//small conjugating protein binding;GO:0042393//histone binding	GO:0008150//biological_process;GO:0009058//biosynthetic process;GO:0034641//cellular nitrogen compound metabolic process;GO:0051276//chromosome organization
ENSDARG00000011334	155	55	15.42	5.325	-1.53395	1.79504e-06	7.72221e-05	yes	ncaldb	neurocalcin delta b [Source:ZFIN;Acc:ZDB-GENE-040808-37]	-	GO:0005575//cellular_component;GO:0005575//cellular_component;GO:0005575//cellular_component;GO:0005575//cellular_component	GO:0003674//molecular_function;GO:0043167//ion binding;GO:0003674//molecular_function;GO:0043167//ion binding;GO:0003674//molecular_function;GO:0043167//ion binding;GO:0003674//molecular_function;GO:0043167//ion binding	-
ENSDARG00000098401	34.5	11.5	27.915	9.64	-1.53394	0.00043103	0.0084552	yes	fam136a	-	-	-	-	-
ENSDARG00000058865	117.5	40.5	13.145	4.565	-1.52583	1.29302e-06	5.82195e-05	yes	endog	endonuclease G [Source:ZFIN;Acc:ZDB-GENE-050522-402]	ko04210//Apoptosis	GO:0005739//mitochondrion;GO:0005575//cellular_component;GO:0005622//intracellular;GO:0005623//cell;GO:0005737//cytoplasm;GO:0005739//mitochondrion;GO:0043226//organelle	GO:0016787//hydrolase activity;GO:0046872//metal ion binding;GO:0003676//nucleic acid binding;GO:0004518//nuclease activity;GO:0003674//molecular_function;GO:0004518//nuclease activity;GO:0043167//ion binding	GO:0006309//apoptotic DNA fragmentation;GO:0006259//DNA metabolic process;GO:0008150//biological_process;GO:0008219//cell death;GO:0009056//catabolic process;GO:0034641//cellular nitrogen compound metabolic process;GO:0034655
ENSDARG00000103846	3481.5	1202.5	201.645	70.2	-1.52227	1.71402e-15	2.38955e-13	yes	hspa5	heat shock protein 5 [Source:ZFIN;Acc:ZDB-GENE-031001-11]	ko04141//Protein processing in endoplasmic reticulum;ko04612//Antigen processing and presentation;ko05020//Prion diseases;ko03060//Protein export	GO:0005576//extracellular region;GO:0005575//cellular_component;GO:0005576//extracellular region	GO:0005524//ATP binding;GO:0000166//nucleotide binding;GO:0003674//molecular_function;GO:0043167//ion binding	GO:0001878//response to yeast;GO:0008150//biological_process
ENSDARG00000039958	64	22	9.335	3.255	-1.51999	0.00076206	0.0132916	yes	utp11l	UTP11-like, U3 small nucleolar ribonucleoprotein (yeast) [Source:ZFIN;Acc:ZDB-GENE-030131-8093]	-	GO:0032040//small-subunit processome;GO:0019013//viral nucleocapsid;GO:0030529//ribonucleoprotein complex;GO:0005730//nucleolus;GO:0019012//virion;GO:0005634//nucleus;GO:0005575//cellular_component;GO:0005622//intracellular;GO:0005623//cell;GO:0043226//organelle;GO:0005730//nucleolus	-	GO:0006364//rRNA processing;GO:0042274//ribosomal small subunit biogenesis;GO:0008150//biological_process;GO:0042254//ribosome biogenesis;GO:0034641//cellular nitrogen compound metabolic process
ENSDARG00000029898	55.5	19	3.15	1.1	-1.51785	0.000448489	0.00870596	yes	CNGA1 (2 of 2)	cyclic nucleotide gated channel alpha 1 [Source:HGNC Symbol;Acc:HGNC:2148]	-	GO:0016020//membrane;GO:0005887//integral component of plasma membrane;GO:0016021//integral component of membrane;GO:0005575//cellular_component;GO:0005623//cell;GO:0005886//plasma membrane;GO:0016020//membrane;GO:0005887//integral component of plasma membrane;GO:0016021//integral component of membrane;GO:0005575//cellular_component;GO:0005623//cell;GO:0005886//plasma membrane	GO:0005222//intracellular cAMP activated cation channel activity;GO:0005249//voltage-gated potassium channel activity;GO:0030553//cGMP binding;GO:0005223//intracellular cGMP activated cation channel activity;GO:0005216//ion channel activity;GO:0003674//molecular_function;GO:0022857//transmembrane transporter activity;GO:0043167//ion binding;GO:0005222//intracellular cAMP activated cation channel …	GO:0007603//phototransduction, visible light;GO:0042391//regulation of membrane potential;GO:0006811//ion transport;GO:0006810//transport;GO:0055085//transmembrane transport;GO:0008150//biological_process;GO:0007165//signal transduction;GO:0007603//phototransduction, visible light;GO:0042391//regulation of membrane potential;GO:0006811//ion transport;GO:0006810//transport;GO:0055085//transmembran…
ENSDARG00000041595	546	191.5	44.83	15.67	-1.51646	6.71109e-08	4.03129e-06	yes	ces3	carboxylesterase 3 [Source:ZFIN;Acc:ZDB-GENE-030131-9563]	-	GO:0005615//extracellular space;GO:0005575//cellular_component;GO:0005576//extracellular region;GO:0005615//extracellular space	GO:0052689//carboxylic ester hydrolase activity;GO:0016787//hydrolase activity;GO:0003674//molecular_function	-
ENSDARG00000101200	163	57	13.175	4.61	-1.51496	1.82412e-07	9.96956e-06	yes	zgc:112964	zgc:112964 [Source:ZFIN;Acc:ZDB-GENE-050306-47]	-	GO:0005575//cellular_component;GO:0005575//cellular_component	GO:0003674//molecular_function;GO:0003674//molecular_function	GO:0007160//cell-matrix adhesion;GO:0007155//cell adhesion;GO:0008150//biological_process
ENSDARG00000009386	68.5	22.5	9.97	3.49	-1.51437	9.17584e-05	0.00232699	yes	MPP4 (1 of 2)	-	-	-	-	-
ENSDARG00000028442	34	11	4.705	1.65	-1.51173	0.00108546	0.0177751	yes	rsg1	-	-	-	-	-
ENSDARG00000037278	64.5	22.5	8.77	3.08	-1.50965	3.56752e-05	0.00104854	yes	lrata	-	-	-	-	-
ENSDARG00000079815	82.5	28.5	28.15	9.89	-1.50909	1.98837e-05	0.000637598	yes	lyrm7	-	-	-	-	-
ENSDARG00000078918	227.5	77.5	41.805	14.69	-1.50884	3.55443e-08	2.2601e-06	yes	comtd1	-	-	-	-	-
ENSDARG00000042988	309.5	128	13.07	4.6	-1.50655	8.0877e-08	4.80288e-06	yes	slc24a2	solute carrier family 24 (sodium/potassium/calcium exchanger), member 2 [Source:ZFIN;Acc:ZDB-GENE-060825-277]	-	GO:0016021//integral component of membrane;GO:0016020//membrane;GO:0005575//cellular_component	GO:0008273//calcium, potassium:sodium antiporter activity;GO:0003674//molecular_function;GO:0022857//transmembrane transporter activity	GO:0007601//visual perception;GO:0055085//transmembrane transport;GO:0006811//ion transport;GO:0006810//transport;GO:0008150//biological_process;GO:0050877//neurological system process
ENSDARG00000076192	541	189	60.475	21.315	-1.50447	1.42992e-10	1.23847e-08	yes	ankrd1b	ankyrin repeat domain 1b (cardiac muscle) [Source:ZFIN;Acc:ZDB-GENE-070820-13]	-	GO:0030017//sarcomere;GO:0005575//cellular_component;GO:0005622//intracellular;GO:0005623//cell;GO:0005737//cytoplasm;GO:0043226//organelle	GO:0031432//titin binding;GO:0003674//molecular_function;GO:0008092//cytoskeletal protein binding	GO:0042692//muscle cell differentiation;GO:0008150//biological_process;GO:0030154//cell differentiation;GO:0048856//anatomical structure development
ENSDARG00000033175	485	167	207.87	73.29	-1.50399	2.02823e-11	1.95837e-09	yes	snrpe	small nuclear ribonucleoprotein polypeptide E [Source:ZFIN;Acc:ZDB-GENE-040426-1112]	ko03040//Spliceosome	GO:0005575//cellular_component;GO:0005622//intracellular;GO:0005623//cell;GO:0005634//nucleus;GO:0043226//organelle;GO:0005737//cytoplasm;GO:0043234//protein complex;GO:0005829//cytosol	GO:0003674//molecular_function;GO:0003723//RNA binding	GO:0006397//mRNA processing;GO:0008150//biological_process;GO:0034641//cellular nitrogen compound metabolic process;GO:0022607//cellular component assembly;GO:0022618//ribonucleoprotein complex assembly;GO:0065003
ENSDARG00000098392	717.5	252	28.9	10.19	-1.50392	1.08463e-12	1.19309e-10	yes	si:ch73-28h20.1	-	-	-	-	-
ENSDARG00000057427	679.5	221.5	25.095	8.855	-1.50284	1.9041e-13	2.28755e-11	yes	sv2ba	synaptic vesicle glycoprotein 2Ba [Source:ZFIN;Acc:ZDB-GENE-070209-134]	-	GO:0016021//integral component of membrane;GO:0016020//membrane;GO:0005575//cellular_component	GO:0022857//transmembrane transporter activity;GO:0005215//transporter activity;GO:0003674//molecular_function	GO:0055085//transmembrane transport;GO:0006810//transport;GO:0008150//biological_process
ENSDARG00000028664	29.5	12	3.445	1.22	-1.49762	0.00382988	0.0464612	yes	ahsa1a	AHA1, activator of heat shock protein ATPase homolog 1a [Source:ZFIN;Acc:ZDB-GENE-030131-1869]	-	-	GO:0051087//chaperone binding;GO:0001671//ATPase activator activity;GO:0003674//molecular_function;GO:0030234//enzyme regulator activity	GO:0048702//embryonic neurocranium morphogenesis;GO:0006950//response to stress;GO:0008150//biological_process;GO:0009790//embryo development;GO:0048856//anatomical structure development
ENSDARG00000088040	145	51	29.765	10.55	-1.49637	6.73505e-07	3.23357e-05	yes	MDP1	-	-	-	-	-
ENSDARG00000002771	70	24.5	3.14	1.115	-1.49372	3.88742e-05	0.00113235	yes	SLC4A5 (1 of 2)	-	-	-	-	-
ENSDARG00000057575	274.5	97	22.075	7.845	-1.49257	2.80979e-09	2.10492e-07	yes	pnp4a	purine nucleoside phosphorylase 4a [Source:ZFIN;Acc:ZDB-GENE-040625-83]	-	GO:0005737//cytoplasm;GO:0005575//cellular_component;GO:0005622//intracellular;GO:0005623//cell;GO:0005737//cytoplasm	GO:0004731//purine-nucleoside phosphorylase activity;GO:0016740//transferase activity;GO:0016763//transferase activity, transferring pentosyl groups;GO:0016757//transferase activity, transferring glycosyl groups;GO:0003824//catalytic activity;GO:0003674//molecular_function	GO:0043101//purine-containing compound salvage;GO:0006139//nucleobase-containing compound metabolic process;GO:0009116//nucleoside metabolic process;GO:0008150//biological_process;GO:0034641//cellular nitrogen compound metabolic process;GO:0044281//small molecule metabolic process;GO:0009058//biosynthetic process
ENSDARG00000100917	93	33.5	3.135	1.115	-1.49142	0.000539343	0.0100505	yes	slc30a8	solute carrier family 30 (zinc transporter), member 8 [Source:ZFIN;Acc:ZDB-GENE-060315-10]	-	GO:0016021//integral component of membrane;GO:0005575//cellular_component	GO:0005385//zinc ion transmembrane transporter activity;GO:0008324//cation transmembrane transporter activity;GO:0003674//molecular_function;GO:0022857//transmembrane transporter activity	GO:0055085//transmembrane transport;GO:0006812//cation transport;GO:0006829//zinc ion transport;GO:0006810//transport;GO:0008150//biological_process
ENSDARG00000042851	87.5	30.5	25.76	9.21	-1.48386	6.02343e-06	0.000226373	yes	srp9	signal recognition particle 9 [Source:ZFIN;Acc:ZDB-GENE-040426-1106]	ko03060//Protein export	GO:0030529//ribonucleoprotein complex;GO:0005786//signal recognition particle, endoplasmic reticulum targeting;GO:0048500//signal recognition particle;GO:0005737//cytoplasm;GO:0005575//cellular_component;GO:0005622//intracellular;GO:0005623//cell	GO:0008312//7S RNA binding;GO:0003723//RNA binding;GO:0003674//molecular_function	GO:0045900//negative regulation of translational elongation;GO:0006614//SRP-dependent cotranslational protein targeting to membrane;GO:0006605//protein targeting;GO:0006810//transport;GO:0008150//biological_process;GO:0061024//membrane organization
ENSDARG00000086756	115	40.5	30.66	10.97	-1.48279	1.85575e-05	0.000600985	yes	RGS9BP	-	-	-	-	-
ENSDARG00000098646	247	88	14.015	5.03	-1.47834	5.14938e-09	3.71868e-07	yes	mthfd2	methylenetetrahydrofolate dehydrogenase (NADP+ dependent) 2, methenyltetrahydrofolate cyclohydrolase [Source:ZFIN;Acc:ZDB-GENE-040704-20]	ko01100//Metabolic pathways;ko00670//One carbon pool by folate	GO:0005739//mitochondrion;GO:0005575//cellular_component;GO:0005622//intracellular;GO:0005623//cell;GO:0005737//cytoplasm;GO:0005739//mitochondrion;GO:0043226//organelle	GO:0004477//methenyltetrahydrofolate cyclohydrolase activity;GO:0016787//hydrolase activity;GO:0003824//catalytic activity;GO:0004488//methylenetetrahydrofolate dehydrogenase (NADP+) activity;GO:0004487//methylenetetrahydrofolate dehydrogenase (NAD+) activity;GO:0003674//molecular_function;GO:0016491//oxidoreductase activity;GO:0016810//hydrolase activity, acting on carbon-nitrogen (but not pepti…	GO:0055114//oxidation-reduction process;GO:0009396//folic acid-containing compound biosynthetic process;GO:0006730//one-carbon metabolic process;GO:0008150//biological_process;GO:0044281//small molecule metabolic process;GO:0006520//cellular amino acid metabolic process;GO:0009058//biosynthetic process;GO:0034641//cellular nitrogen compound metabolic process;GO:0051186//cofactor metabolic process
ENSDARG00000021112	113.5	40	25.02	8.995	-1.47589	1.9407e-05	0.000625389	yes	c1d	-	-	-	-	-
ENSDARG00000005023	813.5	266	64.915	23.36	-1.47451	4.8368e-15	6.56747e-13	yes	fkbp9	FK506 binding protein 9 [Source:ZFIN;Acc:ZDB-GENE-040801-23]	-	GO:0005789//endoplasmic reticulum membrane;GO:0005575//cellular_component;GO:0005622//intracellular;GO:0005623//cell;GO:0005737//cytoplasm;GO:0005783//endoplasmic reticulum;GO:0043226//organelle	GO:0005528//FK506 binding;GO:0003755//peptidyl-prolyl cis-trans isomerase activity;GO:0005509//calcium ion binding;GO:0003674//molecular_function;GO:0043167//ion binding;GO:0016853//isomerase activity	GO:0061077//chaperone-mediated protein folding;GO:0006457//protein folding;GO:0008150//biological_process
ENSDARG00000098376	140.5	50.5	13.145	4.735	-1.47308	2.33605e-06	9.8227e-05	yes	si:ch211-207l14.1	-	-	-	-	-
ENSDARG00000067848	275.5	99.5	51.345	18.5	-1.4727	3.96409e-08	2.48423e-06	yes	nmrk2	-	-	GO:0005575//cellular_component;GO:0005575//cellular_component	-	-
ENSDARG00000015088	358.5	129	22.16	8.04	-1.46269	8.85489e-08	5.19926e-06	yes	dnajb11	DnaJ (Hsp40) homolog, subfamily B, member 11 [Source:ZFIN;Acc:ZDB-GENE-031113-9]	ko04141//Protein processing in endoplasmic reticulum	-	GO:0051082//unfolded protein binding;GO:0003674//molecular_function	GO:0006457//protein folding;GO:0008150//biological_process
ENSDARG00000055638	37.5	13.5	3.745	1.36	-1.46136	0.000549479	0.0101884	yes	ankrd33aa	-	-	-	-	-
ENSDARG00000088549	30.5	11	1.21	0.44	-1.45943	0.00158236	0.0240537	yes	si:ch73-25i22.2	-	-	-	-	-
ENSDARG00000029100	254	91.5	21.39	7.78	-1.45909	1.36812e-07	7.65386e-06	yes	chchd1	coiled-coil-helix-coiled-coil-helix domain containing 1 [Source:ZFIN;Acc:ZDB-GENE-060810-176]	-	GO:0005575//cellular_component;GO:0005575//cellular_component	GO:0003674//molecular_function;GO:0003674//molecular_function	GO:0008150//biological_process;GO:0008150//biological_process
ENSDARG00000033370	36	13	12.22	4.465	-1.45251	0.00222989	0.0310044	yes	ppil3	peptidylprolyl isomerase (cyclophilin)-like 3 [Source:ZFIN;Acc:ZDB-GENE-040625-159]	-	GO:0005575//cellular_component;GO:0005575//cellular_component	GO:0003755//peptidyl-prolyl cis-trans isomerase activity;GO:0016853//isomerase activity;GO:0003674//molecular_function	GO:0000413//protein peptidyl-prolyl isomerization;GO:0006457//protein folding;GO:0008150//biological_process;GO:0006464//cellular protein modification process
ENSDARG00000078647	48	17.5	4.705	1.725	-1.4476	0.000377915	0.00760205	yes	samsn1b	SAM domain, SH3 domain and nuclear localisation signals 1b [Source:ZFIN;Acc:ZDB-GENE-041010-135]	-	GO:0005575//cellular_component;GO:0005575//cellular_component	GO:0003674//molecular_function;GO:0003674//molecular_function	GO:0008150//biological_process;GO:0008150//biological_process
ENSDARG00000045601	93.5	34	4.8	1.76	-1.44746	7.20846e-06	0.00026431	yes	cax1	cation/H+ exchanger protein 1 [Source:ZFIN;Acc:ZDB-GENE-030131-3044]	-	GO:0016020//membrane;GO:0012505//endomembrane system;GO:0016021//integral component of membrane;GO:0005575//cellular_component;GO:0005623//cell	GO:0003674//molecular_function;GO:0003674//molecular_function	GO:0006816//calcium ion transport;GO:0014032//neural crest cell development;GO:0055085//transmembrane transport;GO:0006810//transport;GO:0008150//biological_process;GO:0030154//cell differentiation;GO:0048856//anatomical structure development
ENSDARG00000045792	44.5	18.5	1.69	0.62	-1.44668	0.00130419	0.0206437	yes	si:dkey-106n21.1	si:dkey-106n21.1 [Source:ZFIN;Acc:ZDB-GENE-131120-167]	-	-	GO:0003674//molecular_function;GO:0003674//molecular_function	GO:0006810//transport;GO:0008150//biological_process;GO:0055085//transmembrane transport;GO:0006810//transport;GO:0008150//biological_process;GO:0055085//transmembrane transport
ENSDARG00000062902	64.5	25.5	6.105	2.24	-1.44649	0.000954738	0.0160477	yes	TULP2	-	-	-	-	-
ENSDARG00000043035	185.5	67	8.935	3.29	-1.44138	7.78254e-08	4.63221e-06	yes	capn3b	calpain 3b [Source:ZFIN;Acc:ZDB-GENE-041001-149]	-	GO:0005622//intracellular;GO:0005737//cytoplasm;GO:0005575//cellular_component;GO:0005623//cell;GO:0005737//cytoplasm	GO:0004198//calcium-dependent cysteine-type endopeptidase activity;GO:0008233//peptidase activity;GO:0005509//calcium ion binding;GO:0016787//hydrolase activity;GO:0008234//cysteine-type peptidase activity;GO:0003674//molecular_function;GO:0043167//ion binding	GO:0043066//negative regulation of apoptotic process;GO:0006508//proteolysis;GO:0045214//sarcomere organization;GO:0030163//protein catabolic process;GO:0008150//biological_process;GO:0009056//catabolic process;GO:0007010//cytoskeleton organization;GO:0022607//cellular component assembly;GO:0030154//cell differentiation;GO:0048646//anatomical structure formation involved in morphogenesis;GO:00488…
ENSDARG00000056167	993	359.5	276.43	101.83	-1.44075	4.89664e-11	4.52679e-09	yes	hspe1	-	-	GO:0005737//cytoplasm;GO:0005575//cellular_component;GO:0005622//intracellular;GO:0005623//cell;GO:0005737//cytoplasm;GO:0005575//cellular_component;GO:0005622//intracellular;GO:0005623//cell;GO:0005737//cytoplasm;GO:0005575//cellular_component;GO:0005622//intracellular;GO:0005623//cell	-	GO:0006457//protein folding;GO:0008150//biological_process;GO:0006457//protein folding;GO:0008150//biological_process;GO:0006457//protein folding;GO:0008150//biological_process
ENSDARG00000060797	184.5	67.5	8.95	3.305	-1.43724	1.25356e-07	7.089e-06	yes	pfkmb	phosphofructokinase, muscle b [Source:ZFIN;Acc:ZDB-GENE-081114-1]	ko01100//Metabolic pathways;ko00010//Glycolysis / Gluconeogenesis;ko00030//Pentose phosphate pathway;ko00051//Fructose and mannose metabolism;ko00052//Galactose metabolism	GO:0005737//cytoplasm;GO:0005575//cellular_component;GO:0005622//intracellular;GO:0005623//cell	GO:0005524//ATP binding;GO:0003872//6-phosphofructokinase activity;GO:0016740//transferase activity;GO:0016301//kinase activity;GO:0000166//nucleotide binding;GO:0003674//molecular_function;GO:0043167//ion binding	GO:0016310//phosphorylation;GO:0006002//fructose 6-phosphate metabolic process;GO:0006096//glycolytic process;GO:0005975//carbohydrate metabolic process;GO:0006091//generation of precursor metabolites and energy;GO:0008150//biological_process;GO:0009056//catabolic process;GO:0034641//cellular nitrogen compound metabolic process;GO:0034655;GO:0044281//small molecule metabolic process;GO:0051186//c…
ENSDARG00000079462	44	16	7.705	2.855	-1.4323	0.00384694	0.046603	yes	si:ch211-131k2.3	-	-	-	-	-
ENSDARG00000000551	389	141.5	22.365	8.295	-1.43093	1.15106e-09	8.98444e-08	yes	slc1a4	-	-	GO:0016020//membrane;GO:0016021//integral component of membrane;GO:0005575//cellular_component	GO:0015293//symporter activity;GO:0017153//sodium:dicarboxylate symporter activity;GO:0003674//molecular_function;GO:0022857//transmembrane transporter activity	GO:0006810//transport;GO:0006835//dicarboxylic acid transport;GO:0008150//biological_process
ENSDARG00000007788	604	240.5	28.725	10.66	-1.4301	5.63601e-10	4.52094e-08	yes	atp2b1b	ATPase, Ca++ transporting, plasma membrane 1b [Source:ZFIN;Acc:ZDB-GENE-080409-1]	-	GO:0016020//membrane;GO:0016021//integral component of membrane;GO:0005575//cellular_component	GO:0016787//hydrolase activity;GO:0000166//nucleotide binding;GO:0005388//calcium-transporting ATPase activity;GO:0005524//ATP binding;GO:0046872//metal ion binding;GO:0003674//molecular_function;GO:0043167//ion binding;GO:0016887//ATPase activity;GO:0022857//transmembrane transporter activity	GO:0006810//transport;GO:0070588//calcium ion transmembrane transport;GO:0006811//ion transport;GO:0006816//calcium ion transport;GO:0008150//biological_process;GO:0055085//transmembrane transport
ENSDARG00000035861	48.5	18	1.75	0.65	-1.42884	0.00103187	0.0171017	yes	si:rp71-39b20.4	si:rp71-39b20.4 [Source:ZFIN;Acc:ZDB-GENE-070912-704]	-	GO:0005575//cellular_component;GO:0005623//cell;GO:0005886//plasma membrane;GO:0043234//protein complex	GO:0003674//molecular_function;GO:0022857//transmembrane transporter activity	GO:0006810//transport;GO:0008150//biological_process;GO:0006461//protein complex assembly;GO:0022607//cellular component assembly;GO:0065003;GO:0055085//transmembrane transport
ENSDARG00000053746	46.5	17	4.72	1.755	-1.42732	0.000601462	0.0110036	yes	OSBPL1A (1 of 2)	-	-	-	-	-
ENSDARG00000057108	34.5	13.5	3.275	1.22	-1.42461	0.00157896	0.02403	yes	serpine3	serpin peptidase inhibitor, clade E (nexin, plasminogen activator inhibitor type 1), member 3 [Source:ZFIN;Acc:ZDB-GENE-050309-223]	-	GO:0005615//extracellular space;GO:0005575//cellular_component;GO:0005576//extracellular region;GO:0005615//extracellular space	GO:0004867//serine-type endopeptidase inhibitor activity;GO:0003674//molecular_function;GO:0030234//enzyme regulator activity	-
ENSDARG00000015524	774	286	57.045	21.355	-1.41753	2.66043e-11	2.54057e-09	yes	prps1a	phosphoribosyl pyrophosphate synthetase 1A [Source:ZFIN;Acc:ZDB-GENE-011212-5]	ko01100//Metabolic pathways;ko00230//Purine metabolism;ko00030//Pentose phosphate pathway	-	GO:0000287//magnesium ion binding;GO:0004749//ribose phosphate diphosphokinase activity;GO:0003674//molecular_function;GO:0043167//ion binding	GO:0009156//ribonucleoside monophosphate biosynthetic process;GO:0044249//cellular biosynthetic process;GO:0009165//nucleotide biosynthetic process;GO:0008150//biological_process;GO:0009058//biosynthetic process;GO:0034641//cellular nitrogen compound metabolic process;GO:0044281//small molecule metabolic process
ENSDARG00000070985	124	43	66.32	24.85	-1.4162	4.59702e-06	0.00017834	yes	mrps21	-	-	GO:0005840//ribosome;GO:0044391;GO:0005575//cellular_component;GO:0005622//intracellular;GO:0005623//cell;GO:0005737//cytoplasm;GO:0043226//organelle	GO:0003735//structural constituent of ribosome;GO:0003674//molecular_function;GO:0005198//structural molecule activity	GO:0006412//translation;GO:0008150//biological_process;GO:0009058//biosynthetic process
ENSDARG00000074807	241	89	11.67	4.375	-1.41545	1.55966e-08	1.05611e-06	yes	tbrg4	-	-	-	-	-
ENSDARG00000069495	24.5	9	5.425	2.035	-1.41459	0.00398316	0.0477869	yes	tmem179b	-	-	-	-	-
ENSDARG00000097959	736	250.5	946.095	355.97	-1.41023	2.69634e-12	2.83441e-10	yes	si:dkey-248g15.3	-	-	-	-	-
ENSDARG00000099933	66.5	25	9.54	3.605	-1.40399	9.72138e-05	0.0024534	yes	ppa1a	pyrophosphatase (inorganic) 1a [Source:ZFIN;Acc:ZDB-GENE-040426-1695]	ko00190//Oxidative phosphorylation	GO:0005737//cytoplasm;GO:0005575//cellular_component;GO:0005622//intracellular;GO:0005623//cell	GO:0004427//inorganic diphosphatase activity;GO:0000287//magnesium ion binding;GO:0003674//molecular_function;GO:0043167//ion binding	GO:0006796//phosphate-containing compound metabolic process;GO:0008150//biological_process
ENSDARG00000092360	120.5	45	22.835	8.65	-1.40047	3.36371e-06	0.000135327	yes	C8H22orf39	-	-	-	-	-
ENSDARG00000099819	189	77.5	26.37	9.99	-1.40034	2.78813e-06	0.000115011	yes	sb:cb1058	-	-	-	-	-
ENSDARG00000075622	92	34.5	12.335	4.675	-1.39972	1.30336e-05	0.000438432	yes	zgc:174938	zgc:174938 [Source:ZFIN;Acc:ZDB-GENE-070928-44]	-	-	GO:0008081//phosphoric diester hydrolase activity;GO:0003674//molecular_function	GO:0006629//lipid metabolic process;GO:0008150//biological_process
ENSDARG00000102558	925.5	344.5	354.165	134.235	-1.39966	1.15434e-11	1.13991e-09	yes	pde6h	-	-	GO:0005575//cellular_component;GO:0005575//cellular_component	GO:0004114//3',5'-cyclic-nucleotide phosphodiesterase activity;GO:0030553//cGMP binding;GO:0003674//molecular_function;GO:0043167//ion binding	GO:0007601//visual perception;GO:0008150//biological_process;GO:0050877//neurological system process
ENSDARG00000027529	145	55	15.385	5.835	-1.39872	1.00006e-05	0.000347159	yes	hmox1a	heme oxygenase 1a [Source:ZFIN;Acc:ZDB-GENE-030131-3102]	ko00860//Porphyrin and chlorophyll metabolism;ko04978//Mineral absorption	-	GO:0004392//heme oxygenase (decyclizing) activity;GO:0046872//metal ion binding;GO:0003674//molecular_function;GO:0043167//ion binding;GO:0016491//oxidoreductase activity	GO:0055114//oxidation-reduction process;GO:0006788//heme oxidation;GO:0001666//response to hypoxia;GO:0071466//cellular response to xenobiotic stimulus;GO:0008150//biological_process;GO:0006950//response to stress;GO:0009056//catabolic process;GO:0034641//cellular nitrogen compound metabolic process;GO:0051186//cofactor metabolic process
ENSDARG00000036995	212	75	99.845	37.95	-1.39559	1.10705e-07	6.32911e-06	yes	lsm6	LSM6 homolog, U6 small nuclear RNA associated (S. cerevisiae) [Source:ZFIN;Acc:ZDB-GENE-040625-50]	ko03040//Spliceosome;ko03018//RNA degradation	GO:0005732//small nucleolar ribonucleoprotein complex;GO:0005634//nucleus;GO:0046540//U4/U6 x U5 tri-snRNP complex;GO:0030529//ribonucleoprotein complex;GO:0005681//spliceosomal complex;GO:0005730//nucleolus;GO:0005688//U6 snRNP;GO:0000932//cytoplasmic mRNA processing body;GO:0005575//cellular_component;GO:0005622//intracellular;GO:0005623//cell;GO:0005737//cytoplasm;GO:0043226//organelle;GO:0005…	GO:0003723//RNA binding;GO:0003674//molecular_function	GO:0006397//mRNA processing;GO:0008380//RNA splicing;GO:0030490//maturation of SSU-rRNA;GO:0000398//mRNA splicing, via spliceosome;GO:0008150//biological_process;GO:0034641//cellular nitrogen compound metabolic process;GO:0042254//ribosome biogenesis
ENSDARG00000092787	133.5	50	48.42	18.43	-1.39355	5.10018e-06	0.000195458	yes	TMEM261	-	-	-	-	-
ENSDARG00000027236	920.5	342	131.895	50.275	-1.39148	9.56783e-11	8.45537e-09	yes	rs1a	-	-	GO:0005575//cellular_component;GO:0005575//cellular_component	GO:0070492//oligosaccharide binding;GO:0003674//molecular_function	-
ENSDARG00000074528	28	10.5	8.335	3.18	-1.39016	0.0023752	0.0325902	yes	PRTFDC1 (2 of 2)	-	-	-	-	-
ENSDARG00000036721	382	148	35.91	13.805	-1.37919	3.01045e-09	2.24236e-07	yes	tomm40l	translocase of outer mitochondrial membrane 40 homolog, like [Source:ZFIN;Acc:ZDB-GENE-040426-2319]	-	GO:0005741//mitochondrial outer membrane;GO:0005575//cellular_component;GO:0005622//intracellular;GO:0005623//cell;GO:0005737//cytoplasm;GO:0005739//mitochondrion;GO:0043226//organelle	-	GO:0055085//transmembrane transport;GO:0006810//transport;GO:0008150//biological_process
ENSDARG00000075161	367	139.5	75.005	28.9	-1.37592	2.98488e-09	2.22968e-07	yes	defbl1	defensin, beta-like 1 [Source:ZFIN;Acc:ZDB-GENE-070207-1]	-	GO:0005576//extracellular region;GO:0005575//cellular_component	-	GO:0006952//defense response;GO:0042742//defense response to bacterium;GO:0006950//response to stress;GO:0008150//biological_process
ENSDARG00000070923	100	38	13.655	5.27	-1.37355	3.23523e-05	0.000966122	yes	zgc:158296	zgc:158296 [Source:ZFIN;Acc:ZDB-GENE-070112-1272]	ko04144//Endocytosis;ko04510//Focal adhesion;ko05100//Bacterial invasion of epithelial cells	GO:0016020//membrane;GO:0000139//Golgi membrane;GO:0005794//Golgi apparatus;GO:0005901//caveola;GO:0005886//plasma membrane;GO:0005575//cellular_component;GO:0005623//cell;GO:0005622//intracellular;GO:0005737//cytoplasm;GO:0043226//organelle	-	-
ENSDARG00000062834	240	93.5	24.25	9.36	-1.3734	6.78965e-08	4.06911e-06	yes	ecsit	-	ko04010//MAPK signaling pathway	-	-	-
ENSDARG00000079233	44.5	17	2.055	0.795	-1.37011	0.000646604	0.0116255	yes	E2F2	E2F transcription factor 2 [Source:HGNC Symbol;Acc:HGNC:3114]	ko05200//Pathways in cancer;ko04110//Cell cycle;ko05215//Prostate cancer;ko05222//Small cell lung cancer;ko05212//Pancreatic cancer;ko05218//Melanoma;ko05220//Chronic myeloid leukemia;ko05214//Glioma;ko05223//Non-small cell lung cancer;ko05219//Bladder cancer	GO:0005575//cellular_component;GO:0005622//intracellular;GO:0005623//cell;GO:0043234//protein complex;GO:0005634//nucleus;GO:0043226//organelle	GO:0003674//molecular_function;GO:0003677//DNA binding;GO:0001071//nucleic acid binding transcription factor activity	GO:0008150//biological_process;GO:0009058//biosynthetic process;GO:0034641//cellular nitrogen compound metabolic process
ENSDARG00000079973	78	30	5.15	1.995	-1.36818	4.67919e-05	0.00131838	yes	pus10	pseudouridylate synthase 10 [Source:ZFIN;Acc:ZDB-GENE-080204-5]	-	GO:0005575//cellular_component;GO:0005575//cellular_component	GO:0003723//RNA binding;GO:0009982//pseudouridine synthase activity;GO:0003674//molecular_function;GO:0016853//isomerase activity	GO:0009451//RNA modification;GO:0001522//pseudouridine synthesis;GO:0008150//biological_process;GO:0034641//cellular nitrogen compound metabolic process
ENSDARG00000076055	122.5	47	3.33	1.29	-1.36815	2.1062e-05	0.000671254	yes	rpgrip1	-	-	-	-	-
ENSDARG00000078095	123	60.5	4.78	1.855	-1.36559	0.00384083	0.0465506	yes	cipcb	-	-	-	-	-
ENSDARG00000100442	795	309	40.54	15.785	-1.36079	2.15701e-08	1.42724e-06	yes	cfh	complement factor H [Source:ZFIN;Acc:ZDB-GENE-050208-661]	-	GO:0005575//cellular_component;GO:0005575//cellular_component	GO:0003674//molecular_function;GO:0003674//molecular_function	GO:0008150//biological_process;GO:0008150//biological_process
ENSDARG00000088634	50	18	3.285	1.28	-1.35975	0.000313749	0.00650711	yes	adcy1b	-	-	-	-	-
ENSDARG00000010933	154	56	4.01	1.565	-1.35744	7.55593e-07	3.60775e-05	yes	cacna1fa	-	-	-	-	-
ENSDARG00000100116	433.5	167	142.06	55.565	-1.35425	4.40187e-10	3.57498e-08	yes	mrps24	mitochondrial ribosomal protein S24 [Source:ZFIN;Acc:ZDB-GENE-050522-393]	-	GO:0005840//ribosome;GO:0005739//mitochondrion;GO:0030529//ribonucleoprotein complex;GO:0005762//mitochondrial large ribosomal subunit;GO:0005575//cellular_component;GO:0005622//intracellular;GO:0005623//cell;GO:0005737//cytoplasm;GO:0043226//organelle	GO:0003735//structural constituent of ribosome;GO:0003674//molecular_function;GO:0003735//structural constituent of ribosome;GO:0005198//structural molecule activity	GO:0006412//translation;GO:0006412//translation;GO:0008150//biological_process;GO:0009058//biosynthetic process
ENSDARG00000007697	4489.5	1726.5	1524.58	596.73	-1.35326	1.09203e-12	1.19619e-10	yes	fabp7a	-	ko03320//PPAR signaling pathway	-	GO:0008289//lipid binding;GO:0005215//transporter activity;GO:0005504//fatty acid binding;GO:0003674//molecular_function;GO:0043167//ion binding	GO:0006810//transport;GO:0008150//biological_process
ENSDARG00000075169	41.5	16	2.03	0.795	-1.35245	0.00118635	0.0191151	yes	bbs1	Bardet-Biedl syndrome 1 [Source:ZFIN;Acc:ZDB-GENE-060126-1]	-	GO:0005930//axoneme;GO:0034464//BBSome;GO:0036064//ciliary basal body;GO:0005813//centrosome;GO:0005575//cellular_component;GO:0005622//intracellular;GO:0005623//cell;GO:0005815//microtubule organizing center;GO:0005856//cytoskeleton;GO:0043226//organelle;GO:0005929//cilium;GO:0043234//protein complex;GO:0005737//cytoplasm	GO:0005119//smoothened binding;GO:0005113//patched binding;GO:0003674//molecular_function	GO:0060026//convergent extension;GO:0033339//pectoral fin development;GO:0007368//determination of left/right symmetry;GO:0032402//melanosome transport;GO:0070121//Kupffer's vesicle development;GO:0060028//convergent extension involved in axis elongation;GO:0007369//gastrulation;GO:0008593//regulation of Notch signaling pathway;GO:0060027//convergent extension involved in gastrulation;GO:0003341/…
ENSDARG00000054446	105	41.5	8.255	3.235	-1.3515	0.000372575	0.00751783	yes	ccdc43	-	-	-	-	-
ENSDARG00000069583	1553.5	608	158.045	61.975	-1.35058	2.15349e-10	1.81101e-08	yes	CNDP1	-	-	GO:0005575//cellular_component;GO:0005575//cellular_component	GO:0016787//hydrolase activity;GO:0008237//metallopeptidase activity;GO:0003674//molecular_function;GO:0008233//peptidase activity	GO:0008152//metabolic process;GO:0006508//proteolysis;GO:0008150//biological_process
ENSDARG00000071669	110.5	43	10.08	3.955	-1.34975	1.09655e-05	0.000377137	yes	smyd5	SMYD family member 5 [Source:ZFIN;Acc:ZDB-GENE-040912-39]	-	-	GO:0003674//molecular_function;GO:0003674//molecular_function	GO:0008150//biological_process;GO:0008150//biological_process
ENSDARG00000039605	3182	1257	170.945	67.385	-1.34303	4.6735e-09	3.42242e-07	yes	mat1a	methionine adenosyltransferase I, alpha [Source:ZFIN;Acc:ZDB-GENE-030131-6127]	ko01100//Metabolic pathways;ko00270//Cysteine and methionine metabolism	GO:0005829//cytosol;GO:0005575//cellular_component;GO:0005622//intracellular;GO:0005623//cell;GO:0005737//cytoplasm;GO:0005829//cytosol	GO:0016740//transferase activity;GO:0005524//ATP binding;GO:0004478//methionine adenosyltransferase activity;GO:0000166//nucleotide binding;GO:0046872//metal ion binding;GO:0003674//molecular_function;GO:0043167//ion binding;GO:0016765//transferase activity, transferring alkyl or aryl (other than methyl) groups	GO:0006556//S-adenosylmethionine biosynthetic process;GO:0006730//one-carbon metabolic process;GO:0008150//biological_process;GO:0044281//small molecule metabolic process;GO:0006790//sulfur compound metabolic process;GO:0009058//biosynthetic process;GO:0034641//cellular nitrogen compound metabolic process;GO:0051186//cofactor metabolic process
ENSDARG00000045155	209	82.5	105.975	41.89	-1.33905	3.78548e-07	1.95035e-05	yes	phf5a	-	ko03040//Spliceosome	-	-	-
ENSDARG00000052700	190	75	11.525	4.56	-1.33766	1.22465e-06	5.53322e-05	yes	SLC9B1	solute carrier family 9, subfamily B (NHA1, cation proton antiporter 1), member 1 [Source:HGNC Symbol;Acc:HGNC:24244]	-	GO:0005575//cellular_component	GO:0003674//molecular_function;GO:0022857//transmembrane transporter activity	GO:0006810//transport;GO:0008150//biological_process
ENSDARG00000063624	374.5	148	17.945	7.115	-1.33465	9.34263e-09	6.56502e-07	yes	gfm1	G elongation factor, mitochondrial 1 [Source:ZFIN;Acc:ZDB-GENE-061013-79]	-	GO:0005575//cellular_component;GO:0005622//intracellular;GO:0005623//cell;GO:0005737//cytoplasm;GO:0005739//mitochondrion;GO:0043226//organelle	GO:0003674//molecular_function;GO:0003723//RNA binding;GO:0008135//translation factor activity, nucleic acid binding;GO:0043167//ion binding;GO:0003924//GTPase activity	GO:0006412//translation;GO:0008150//biological_process;GO:0009058//biosynthetic process;GO:0007005//mitochondrion organization
ENSDARG00000010962	219.5	88.5	43.205	17.19	-1.32963	2.26711e-06	9.55889e-05	yes	fkbp7	FK506 binding protein 7 [Source:ZFIN;Acc:ZDB-GENE-030616-182]	-	GO:0005789//endoplasmic reticulum membrane;GO:0005575//cellular_component;GO:0005622//intracellular;GO:0005623//cell;GO:0005737//cytoplasm;GO:0005783//endoplasmic reticulum;GO:0043226//organelle	GO:0003755//peptidyl-prolyl cis-trans isomerase activity;GO:0005528//FK506 binding;GO:0005509//calcium ion binding;GO:0003674//molecular_function;GO:0043167//ion binding;GO:0016853//isomerase activity	GO:0061077//chaperone-mediated protein folding;GO:0006457//protein folding;GO:0008150//biological_process
ENSDARG00000089921	38	15	8.84	3.52	-1.32847	0.00160909	0.0243323	yes	smim4	-	-	-	-	-
ENSDARG00000027428	38.5	15.5	5.88	2.345	-1.32623	0.00350704	0.0435997	yes	rpp30	ribonuclease P/MRP 30 subunit [Source:ZFIN;Acc:ZDB-GENE-050320-45]	ko03013//RNA transport;ko03008//Ribosome biogenesis in eukaryotes	GO:0005655//nucleolar ribonuclease P complex;GO:0005840//ribosome;GO:0005575//cellular_component;GO:0005622//intracellular;GO:0005623//cell;GO:0005737//cytoplasm;GO:0043226//organelle;GO:0005634//nucleus;GO:0005730//nucleolus	GO:0003824//catalytic activity;GO:0004526//ribonuclease P activity;GO:0004540//ribonuclease activity;GO:0003723//RNA binding;GO:0003735//structural constituent of ribosome;GO:0003674//molecular_function;GO:0005198//structural molecule activity;GO:0003723//RNA binding;GO:0004518//nuclease activity	GO:0008033//tRNA processing;GO:0006412//translation;GO:0008150//biological_process;GO:0034641//cellular nitrogen compound metabolic process;GO:0009058//biosynthetic process;GO:0006399//tRNA metabolic process
ENSDARG00000021345	48	19	3.435	1.37	-1.32613	0.000589043	0.0108357	yes	prph2l	peripherin 2, like [Source:ZFIN;Acc:ZDB-GENE-041001-147]	-	GO:0016020//membrane;GO:0016021//integral component of membrane;GO:0005575//cellular_component	-	GO:0007601//visual perception;GO:0008150//biological_process;GO:0050877//neurological system process
ENSDARG00000071288	59.5	23.5	2.54	1.015	-1.32335	0.000359876	0.00731823	yes	samhd1	-	-	-	-	-
ENSDARG00000097813	96.5	38	21.235	8.5	-1.32091	2.82869e-05	0.000860488	yes	-	-	-	-	-	-
ENSDARG00000087873	187	74.5	13.99	5.615	-1.31704	9.31569e-06	0.000327746	yes	si:ch211-170n20.3	-	-	-	-	-
ENSDARG00000020814	75.5	30	16.135	6.485	-1.31502	0.000216218	0.00480955	yes	faimb	Fas apoptotic inhibitory molecule b [Source:ZFIN;Acc:ZDB-GENE-040718-91]	-	GO:0005575//cellular_component;GO:0005575//cellular_component	GO:0003674//molecular_function;GO:0003674//molecular_function	GO:0043066//negative regulation of apoptotic process;GO:0008150//biological_process
ENSDARG00000099306	614.5	246	95.98	38.655	-1.31208	3.11788e-08	2.00699e-06	yes	FBXO2	F-box protein 2 [Source:HGNC Symbol;Acc:HGNC:13581]	ko04141//Protein processing in endoplasmic reticulum;ko04120//Ubiquitin mediated proteolysis	GO:0005575//cellular_component;GO:0005575//cellular_component	-	-
ENSDARG00000014963	53.5	21.5	9.065	3.655	-1.31044	0.00099658	0.0166224	yes	triap1	TP53 regulated inhibitor of apoptosis 1 [Source:ZFIN;Acc:ZDB-GENE-050417-161]	-	GO:0005758//mitochondrial intermembrane space;GO:0005575//cellular_component;GO:0005622//intracellular;GO:0005623//cell;GO:0005737//cytoplasm;GO:0005739//mitochondrion;GO:0043226//organelle	-	GO:0048793//pronephros development;GO:0008150//biological_process;GO:0048856//anatomical structure development
ENSDARG00000071339	30	11.5	9.04	3.645	-1.3104	0.00315111	0.0403089	yes	mef2bnb	-	-	-	-	-
ENSDARG00000069116	265	106	57.44	23.19	-1.30855	3.12971e-07	1.63183e-05	yes	timm10	translocase of inner mitochondrial membrane 10 homolog (yeast) [Source:ZFIN;Acc:ZDB-GENE-040718-427]	-	GO:0005575//cellular_component;GO:0005622//intracellular;GO:0005623//cell;GO:0005737//cytoplasm;GO:0005739//mitochondrion;GO:0043226//organelle	GO:0003674//molecular_function;GO:0008565//protein transporter activity;GO:0043167//ion binding	GO:0006810//transport;GO:0008150//biological_process
ENSDARG00000056099	98	40	22.895	9.255	-1.30673	7.61355e-05	0.00199325	yes	gtf2h5	-	ko03420//Nucleotide excision repair;ko03022//Basal transcription factors	-	-	-
ENSDARG00000092115	2815	1190.5	247.125	100.005	-1.30517	7.16259e-11	6.39482e-09	yes	eif4a1a	eukaryotic translation initiation factor 4A1A [Source:ZFIN;Acc:ZDB-GENE-031030-2]	ko03013//RNA transport	-	GO:0016787//hydrolase activity;GO:0004386//helicase activity;GO:0003676//nucleic acid binding;GO:0000166//nucleotide binding;GO:0005524//ATP binding;GO:0003743//translation initiation factor activity;GO:0003674//molecular_function;GO:0003723//RNA binding;GO:0008135//translation factor activity, nucleic acid binding;GO:0043167//ion binding	GO:0006413//translational initiation;GO:0006412//translation;GO:0008150//biological_process;GO:0009058//biosynthetic process
ENSDARG00000003941	180.5	73	11.685	4.73	-1.30475	4.02347e-06	0.000158447	yes	rrs1	RRS1 ribosome biogenesis regulator homolog (S. cerevisiae) [Source:ZFIN;Acc:ZDB-GENE-030131-9345]	-	GO:0005634//nucleus;GO:0005575//cellular_component;GO:0005622//intracellular;GO:0005623//cell;GO:0043226//organelle	GO:0003674//molecular_function;GO:0003674//molecular_function	GO:0042254//ribosome biogenesis;GO:0008150//biological_process
ENSDARG00000015134	56.5	23	3.565	1.445	-1.30283	0.00148052	0.0229063	yes	camkk1b	calcium/calmodulin-dependent protein kinase kinase 1, alpha b [Source:ZFIN;Acc:ZDB-GENE-080722-13]	-	GO:0005575//cellular_component;GO:0005575//cellular_component;GO:0005575//cellular_component;GO:0005575//cellular_component	GO:0016301//kinase activity;GO:0000166//nucleotide binding;GO:0004672//protein kinase activity;GO:0005524//ATP binding;GO:0004674//protein serine/threonine kinase activity;GO:0016740//transferase activity;GO:0016772//transferase activity, transferring phosphorus-containing groups;GO:0003674//molecular_function;GO:0043167//ion binding;GO:0016301//kinase activity;GO:0000166//nucleotide binding;GO:0…	GO:0006468//protein phosphorylation;GO:0016310//phosphorylation;GO:0008150//biological_process;GO:0006464//cellular protein modification process;GO:0006468//protein phosphorylation;GO:0016310//phosphorylation;GO:0008150//biological_process;GO:0006464//cellular protein modification process
ENSDARG00000016122	92	37	14.18	5.755	-1.30097	7.89541e-05	0.00205833	yes	ptrhd1	peptidyl-tRNA hydrolase domain containing 1 [Source:ZFIN;Acc:ZDB-GENE-081110-2]	-	-	GO:0004045//aminoacyl-tRNA hydrolase activity;GO:0003674//molecular_function	-
ENSDARG00000103234	110	44	15.62	6.34	-1.30084	8.22196e-05	0.00211623	yes	ppie	peptidylprolyl isomerase E (cyclophilin E) [Source:ZFIN;Acc:ZDB-GENE-050417-167]	ko03040//Spliceosome	-	GO:0003723//RNA binding;GO:0003755//peptidyl-prolyl cis-trans isomerase activity;GO:0016853//isomerase activity;GO:0000166//nucleotide binding;GO:0003676//nucleic acid binding;GO:0003674//molecular_function	GO:0006457//protein folding;GO:0000413//protein peptidyl-prolyl isomerization;GO:0006464//cellular protein modification process;GO:0008150//biological_process
ENSDARG00000005776	284	115.5	35.53	14.45	-1.29797	9.66529e-07	4.45972e-05	yes	guk1b	guanylate kinase 1b [Source:ZFIN;Acc:ZDB-GENE-020916-1]	ko01100//Metabolic pathways;ko00230//Purine metabolism	-	GO:0004385//guanylate kinase activity;GO:0016740//transferase activity;GO:0016301//kinase activity;GO:0003674//molecular_function	GO:0016310//phosphorylation;GO:0006163//purine nucleotide metabolic process;GO:0008150//biological_process;GO:0034641//cellular nitrogen compound metabolic process;GO:0044281//small molecule metabolic process
ENSDARG00000054164	165	66	52.51	21.375	-1.29667	2.17462e-06	9.20332e-05	yes	mrps17	mitochondrial ribosomal protein S17 [Source:ZFIN;Acc:ZDB-GENE-050522-390]	-	GO:0005622//intracellular;GO:0005840//ribosome;GO:0005575//cellular_component;GO:0005623//cell;GO:0005737//cytoplasm;GO:0043226//organelle	GO:0003735//structural constituent of ribosome;GO:0003674//molecular_function;GO:0005198//structural molecule activity	GO:0006412//translation;GO:0008150//biological_process;GO:0009058//biosynthetic process
ENSDARG00000004199	51.5	21	5.095	2.075	-1.29597	0.00130342	0.0206437	yes	spam1	sperm adhesion molecule 1 [Source:ZFIN;Acc:ZDB-GENE-050506-63]	-	GO:0005575//cellular_component;GO:0005575//cellular_component	GO:0016798//hydrolase activity, acting on glycosyl bonds;GO:0003824//catalytic activity;GO:0004415//hyalurononglucosaminidase activity;GO:0016787//hydrolase activity;GO:0003674//molecular_function	GO:0008152//metabolic process;GO:0005975//carbohydrate metabolic process;GO:0008150//biological_process
ENSDARG00000051762	78.5	31.5	10.135	4.13	-1.29513	0.0001548	0.00366876	yes	DNAJA4	-	-	-	-	-
ENSDARG00000001782	76	32	5.46	2.225	-1.2951	0.000259565	0.005611	yes	prkacba	protein kinase, cAMP-dependent, catalytic, beta a [Source:ZFIN;Acc:ZDB-GENE-040426-1351]	ko04010//MAPK signaling pathway;ko04020//Calcium signaling pathway;ko04310//Wnt signaling pathway;ko04062//Chemokine signaling pathway;ko04910//Insulin signaling pathway;ko04114//Oocyte meiosis;ko04270//Vascular smooth muscle contraction;ko04916//Melanogenesis;ko04725//Cholinergic synapse;ko04912//GnRH signaling pathway;ko04540//Gap junction;ko05414//Dilated cardiomyopathy;ko04724//Glutamatergic …	GO:0005575//cellular_component;GO:0005575//cellular_component	GO:0016740//transferase activity;GO:0005524//ATP binding;GO:0004672//protein kinase activity;GO:0004674//protein serine/threonine kinase activity;GO:0016301//kinase activity;GO:0000166//nucleotide binding;GO:0016772//transferase activity, transferring phosphorus-containing groups;GO:0003674//molecular_function;GO:0043167//ion binding	GO:0006468//protein phosphorylation;GO:0016310//phosphorylation;GO:0008150//biological_process;GO:0006464//cellular protein modification process
ENSDARG00000099667	377.5	151	147.015	59.935	-1.29449	3.343e-08	2.1466e-06	yes	snrpg	-	-	-	-	-
ENSDARG00000007377	681	277.5	53.13	21.665	-1.29416	1.16291e-09	9.04985e-08	yes	odc1	-	ko01100//Metabolic pathways;ko00330//Arginine and proline metabolism;ko00480//Glutathione metabolism	GO:0005737//cytoplasm;GO:0005575//cellular_component;GO:0005622//intracellular;GO:0005623//cell;GO:0005737//cytoplasm	GO:0003824//catalytic activity;GO:0004586//ornithine decarboxylase activity;GO:0003674//molecular_function;GO:0016829//lyase activity	GO:0042462//eye photoreceptor cell development;GO:0033387//putrescine biosynthetic process from ornithine;GO:0006596//polyamine biosynthetic process;GO:0008150//biological_process;GO:0009058//biosynthetic process;GO:0034641//cellular nitrogen compound metabolic process;GO:0006520//cellular amino acid metabolic process;GO:0044281//small molecule metabolic process;GO:0030154//cell differentiation;G…
ENSDARG00000097964	39	16	1.91	0.78	-1.29203	0.00251621	0.0340193	yes	arhgef33	Rho guanine nucleotide exchange factor (GEF) 33 [Source:ZFIN;Acc:ZDB-GENE-131121-574]	-	-	-	GO:0008150//biological_process
ENSDARG00000010023	155	62.5	10.895	4.455	-1.29017	0.000269723	0.00580172	yes	CU856539.1	-	-	-	-	-
ENSDARG00000105195	143.5	58.5	8.135	3.33	-1.28862	0.000170838	0.00395185	yes	dnajc21	-	-	-	-	-
ENSDARG00000007382	82	34	8.765	3.595	-1.28576	0.0003001	0.00630428	yes	ubtd1a	-	-	GO:0005575//cellular_component;GO:0005575//cellular_component	GO:0003674//molecular_function;GO:0003674//molecular_function	-
ENSDARG00000097652	37	15	6.83	2.805	-1.28388	0.00209236	0.0297101	yes	si:dkey-234i14.2	-	-	-	-	-
ENSDARG00000075058	87.5	36	4.33	1.78	-1.28249	8.65511e-05	0.002215	yes	gabra6a	gamma-aminobutyric acid (GABA) A receptor, alpha 6a [Source:ZFIN;Acc:ZDB-GENE-040426-1692]	-	GO:0030054//cell junction;GO:0016021//integral component of membrane;GO:0016020//membrane;GO:0045202//synapse;GO:0005886//plasma membrane;GO:0005575//cellular_component;GO:0005623//cell	GO:0005216//ion channel activity;GO:0005230//extracellular ligand-gated ion channel activity;GO:0004890//GABA-A receptor activity;GO:0003674//molecular_function;GO:0004871//signal transducer activity;GO:0022857//transmembrane transporter activity	GO:0006810//transport;GO:0006811//ion transport;GO:0008150//biological_process
ENSDARG00000036190	234	95	46.45	19.105	-1.28173	2.61021e-05	0.00080151	yes	txnl4a	-	ko03040//Spliceosome	GO:0005682//U5 snRNP;GO:0005681//spliceosomal complex;GO:0046540//U4/U6 x U5 tri-snRNP complex;GO:0005575//cellular_component;GO:0005622//intracellular;GO:0005623//cell;GO:0005634//nucleus;GO:0043226//organelle	-	GO:0000245//spliceosomal complex assembly;GO:0007067//mitosis;GO:0007049//cell cycle;GO:0008150//biological_process;GO:0006397//mRNA processing;GO:0022607//cellular component assembly;GO:0022618//ribonucleoprotein complex assembly;GO:0034641//cellular nitrogen compound metabolic process;GO:0065003
ENSDARG00000095224	56.5	23	2.09	0.86	-1.28109	0.000742906	0.0130158	yes	camkmt	-	-	-	-	-
ENSDARG00000068156	92.5	37.5	30.015	12.36	-1.28	0.000175783	0.00403758	yes	chchd7	coiled-coil-helix-coiled-coil-helix domain containing 7 [Source:ZFIN;Acc:ZDB-GENE-080204-55]	-	GO:0005575//cellular_component;GO:0005575//cellular_component	GO:0003674//molecular_function;GO:0003674//molecular_function	GO:0008150//biological_process;GO:0008150//biological_process
ENSDARG00000016088	143	58	24.34	10.06	-1.2747	8.9206e-05	0.00227331	yes	rtn2a	reticulon 2a [Source:ZFIN;Acc:ZDB-GENE-060420-1]	-	GO:0016020//membrane;GO:0016021//integral component of membrane;GO:0005783//endoplasmic reticulum;GO:0012505//endomembrane system;GO:0005575//cellular_component;GO:0005623//cell;GO:0005622//intracellular;GO:0005737//cytoplasm;GO:0043226//organelle	GO:0003674//molecular_function;GO:0003674//molecular_function	GO:0008150//biological_process;GO:0008150//biological_process
ENSDARG00000033973	146.5	60	23.275	9.62	-1.27467	5.14798e-05	0.00142774	yes	mrps23	mitochondrial ribosomal protein S23 [Source:ZFIN;Acc:ZDB-GENE-040801-134]	-	GO:0005840//ribosome;GO:0030529//ribonucleoprotein complex;GO:0005575//cellular_component;GO:0005622//intracellular;GO:0005623//cell;GO:0005737//cytoplasm;GO:0043226//organelle	GO:0003735//structural constituent of ribosome;GO:0003674//molecular_function;GO:0005198//structural molecule activity	GO:0006412//translation;GO:0008150//biological_process;GO:0009058//biosynthetic process
ENSDARG00000069314	42.5	17.5	8.605	3.56	-1.2733	0.00255894	0.0343697	yes	tmem199	-	-	-	-	-
ENSDARG00000007009	63	26	4.73	1.96	-1.27099	0.000369022	0.00746347	yes	hoxa11b	-	-	-	-	-
ENSDARG00000063014	176	72	7.71	3.195	-1.27091	5.17643e-05	0.00143404	yes	dbpa	D site albumin promoter binding protein a [Source:ZFIN;Acc:ZDB-GENE-060503-802]	-	-	GO:0043565//sequence-specific DNA binding;GO:0003700//sequence-specific DNA binding transcription factor activity;GO:0001071//nucleic acid binding transcription factor activity;GO:0003674//molecular_function;GO:0003677//DNA binding	GO:0006355//regulation of transcription, DNA-templated;GO:0008150//biological_process
ENSDARG00000078773	120	49.5	22.225	9.225	-1.26856	2.47885e-05	0.000771257	yes	tmem70	-	-	-	-	-
ENSDARG00000033320	217	92	30.255	12.56	-1.26834	3.08945e-06	0.00012565	yes	sar1ab	-	ko04141//Protein processing in endoplasmic reticulum	GO:0005794//Golgi apparatus;GO:0005622//intracellular;GO:0005783//endoplasmic reticulum;GO:0005575//cellular_component;GO:0005623//cell;GO:0005737//cytoplasm;GO:0043226//organelle	GO:0000166//nucleotide binding;GO:0005525//GTP binding;GO:0003674//molecular_function;GO:0043167//ion binding	GO:0006810//transport;GO:0006886//intracellular protein transport;GO:0016192//vesicle-mediated transport;GO:0015031//protein transport;GO:0008150//biological_process
ENSDARG00000012076	49364	20380	8565.92	3556.38	-1.2682	3.76823e-08	2.37864e-06	yes	apoa1a	apolipoprotein A-Ia [Source:ZFIN;Acc:ZDB-GENE-990415-14]	ko03320//PPAR signaling pathway;ko04975//Fat digestion and absorption;ko05143//African trypanosomiasis;ko04977//Vitamin digestion and absorption	GO:0005575//cellular_component;GO:0005576//extracellular region;GO:0005615//extracellular space	GO:0003674//molecular_function;GO:0030234//enzyme regulator activity;GO:0008289//lipid binding;GO:0043167//ion binding	GO:0008150//biological_process;GO:0042592//homeostatic process;GO:0022607//cellular component assembly;GO:0065003;GO:0006629//lipid metabolic process;GO:0034641//cellular nitrogen compound metabolic process;GO:0044281//small molecule metabolic process;GO:0006810//transport;GO:0006950//response to stress;GO:0030154//cell differentiation;GO:0048856//anatomical structure development;GO:0009058//bios…
ENSDARG00000051981	89.5	37	8.615	3.58	-1.26689	0.000107514	0.00266494	yes	STX3 (2 of 2)	-	ko04130//SNARE interactions in vesicular transport	GO:0016021//integral component of membrane;GO:0016020//membrane;GO:0012505//endomembrane system;GO:0005886//plasma membrane;GO:0031201//SNARE complex;GO:0008021//synaptic vesicle;GO:0005575//cellular_component;GO:0005622//intracellular;GO:0005623//cell;GO:0005737//cytoplasm;GO:0016023//cytoplasmic membrane-bounded vesicle;GO:0043226//organelle;GO:0043234//protein complex;GO:0005886//plasma membra…	GO:0005484//SNAP receptor activity;GO:0000149//SNARE binding;GO:0003674//molecular_function	GO:0006886//intracellular protein transport;GO:0031629//synaptic vesicle fusion to presynaptic membrane;GO:0048278//vesicle docking;GO:0016192//vesicle-mediated transport;GO:0006810//transport;GO:0008150//biological_process;GO:0007267//cell-cell signaling;GO:0061024//membrane organization
ENSDARG00000044562	2276	937.5	399.365	166.13	-1.2654	7.69251e-11	6.84449e-09	yes	cycsb	cytochrome c, somatic b [Source:ZFIN;Acc:ZDB-GENE-040625-38]	ko05200//Pathways in cancer;ko05010//Alzheimer's disease;ko05016//Huntington's disease;ko05152//Tuberculosis;ko05164//Influenza A;ko05145//Toxoplasmosis;ko05012//Parkinson's disease;ko04210//Apoptosis;ko05222//Small cell lung cancer;ko05210//Colorectal cancer;ko04115//p53 signaling pathway;ko05014//Amyotrophic lateral sclerosis (ALS);ko05416//Viral myocarditis	GO:0005758//mitochondrial intermembrane space;GO:0005575//cellular_component;GO:0005622//intracellular;GO:0005623//cell;GO:0005737//cytoplasm;GO:0005739//mitochondrion;GO:0043226//organelle	GO:0009055//electron carrier activity;GO:0003674//molecular_function	GO:0006122//mitochondrial electron transport, ubiquinol to cytochrome c;GO:0043280//positive regulation of cysteine-type endopeptidase activity involved in apoptotic process;GO:0006123//mitochondrial electron transport, cytochrome c to oxygen;GO:0006091//generation of precursor metabolites and energy;GO:0008150//biological_process;GO:0034641//cellular nitrogen compound metabolic process;GO:004428…
ENSDARG00000054980	254	103.5	51.53	21.44	-1.26511	0.000195746	0.00442211	yes	ebna1bp2	-	-	-	GO:0003674//molecular_function;GO:0003674//molecular_function	GO:0008150//biological_process;GO:0008150//biological_process
ENSDARG00000016706	942	384	74.72	31.2	-1.25995	1.26897e-09	9.84588e-08	yes	atic	5-aminoimidazole-4-carboxamide ribonucleotide formyltransferase/IMP cyclohydrolase [Source:ZFIN;Acc:ZDB-GENE-011212-4]	ko01100//Metabolic pathways;ko00230//Purine metabolism;ko00670//One carbon pool by folate	-	GO:0004643//phosphoribosylaminoimidazolecarboxamide formyltransferase activity;GO:0003824//catalytic activity;GO:0003937//IMP cyclohydrolase activity;GO:0003674//molecular_function;GO:0016810//hydrolase activity, acting on carbon-nitrogen (but not peptide) bonds	GO:0006164//purine nucleotide biosynthetic process;GO:0008150//biological_process;GO:0009058//biosynthetic process;GO:0034641//cellular nitrogen compound metabolic process;GO:0044281//small molecule metabolic process
ENSDARG00000093381	65	27	3.71	1.55	-1.25915	0.000441786	0.00862724	yes	tgm2l	-	-	-	-	-
ENSDARG00000055514	667	268	523.8	218.92	-1.25861	1.91813e-09	1.46644e-07	yes	icn2	ictacalcin 2 [Source:ZFIN;Acc:ZDB-GENE-070822-9]	-	GO:0005575//cellular_component;GO:0005575//cellular_component	GO:0046872//metal ion binding;GO:0005509//calcium ion binding;GO:0003674//molecular_function;GO:0043167//ion binding	GO:0008150//biological_process;GO:0008150//biological_process
ENSDARG00000088717	138	62	42.125	17.685	-1.25215	0.0001757	0.00403758	yes	C6H2orf40 (2 of 2)	-	-	-	-	-
ENSDARG00000031098	279	117	21.895	9.215	-1.24855	3.62414e-07	1.87092e-05	yes	timm50	-	-	-	-	-
ENSDARG00000103760	72.5	30.5	4.145	1.745	-1.24815	0.000402513	0.0079981	yes	cfhl2	complement factor H like 2 [Source:ZFIN;Acc:ZDB-GENE-041114-123]	-	GO:0005575//cellular_component;GO:0005575//cellular_component	GO:0003674//molecular_function;GO:0003674//molecular_function	GO:0008150//biological_process;GO:0008150//biological_process
ENSDARG00000091465	80	33.5	8.645	3.64	-1.24793	0.000574656	0.0106025	yes	si:dkey-66a8.7	si:dkey-66a8.7 [Source:ZFIN;Acc:ZDB-GENE-131127-421]	-	-	-	GO:0006629//lipid metabolic process;GO:0008150//biological_process;GO:0006629//lipid metabolic process;GO:0008150//biological_process
ENSDARG00000017634	922.5	380.5	61.025	25.705	-1.24735	1.69061e-10	1.44034e-08	yes	pdcb	phosducin b [Source:ZFIN;Acc:ZDB-GENE-031023-2]	-	GO:0005575//cellular_component;GO:0005575//cellular_component	-	-
ENSDARG00000022340	123.5	51	18.985	8	-1.24679	0.000199161	0.0044837	yes	ufc1	ubiquitin-fold modifier conjugating enzyme 1 [Source:ZFIN;Acc:ZDB-GENE-040801-268]	-	GO:0005575//cellular_component	GO:0003674//molecular_function	-
ENSDARG00000103133	50	21	3.2	1.35	-1.24511	0.00216716	0.0304406	yes	hoxc12b	homeobox C12b [Source:ZFIN;Acc:ZDB-GENE-000329-17]	-	GO:0005634//nucleus;GO:0005575//cellular_component;GO:0005622//intracellular;GO:0005623//cell;GO:0043226//organelle	GO:0003677//DNA binding;GO:0043565//sequence-specific DNA binding;GO:0003674//molecular_function	GO:0006355//regulation of transcription, DNA-templated;GO:0008150//biological_process
ENSDARG00000004727	76.5	32	11.81	4.995	-1.24145	0.000376738	0.00759008	yes	cmss1	-	-	-	-	-
ENSDARG00000069159	28.5	8	1.205	0.51	-1.24046	0.00157219	0.0239691	yes	rab38b	-	-	-	-	-
ENSDARG00000044380	89.5	37.5	8.92	3.78	-1.23866	0.00132257	0.0208587	yes	rbmx2	RNA binding motif protein, X-linked 2 [Source:ZFIN;Acc:ZDB-GENE-050626-88]	-	GO:0005575//cellular_component;GO:0005575//cellular_component	GO:0000166//nucleotide binding;GO:0003676//nucleic acid binding;GO:0003674//molecular_function	GO:0008150//biological_process;GO:0008150//biological_process
ENSDARG00000045843	640	285	86.415	36.655	-1.23727	6.8066e-08	4.06991e-06	yes	apex1	-	ko03410//Base excision repair	-	-	-
ENSDARG00000036386	385.5	171	59.255	25.16	-1.2358	8.46837e-06	0.000302924	yes	rbm4.1	RNA binding motif protein 4.1 [Source:ZFIN;Acc:ZDB-GENE-030131-3902]	-	GO:0005575//cellular_component;GO:0005622//intracellular;GO:0005623//cell;GO:0005634//nucleus;GO:0043226//organelle	GO:0003674//molecular_function;GO:0003723//RNA binding;GO:0043167//ion binding	-
ENSDARG00000012234	337	140.5	31.125	13.255	-1.23154	2.26845e-07	1.22546e-05	yes	psme3	proteasome (prosome, macropain) activator subunit 3 (PA28 gamma; Ki) [Source:ZFIN;Acc:ZDB-GENE-991110-19]	ko05160//Hepatitis C;ko03050//Proteasome;ko04612//Antigen processing and presentation	GO:0008537//proteasome activator complex;GO:0000502//proteasome complex;GO:0005575//cellular_component;GO:0005622//intracellular;GO:0005623//cell;GO:0043234//protein complex	-	-
ENSDARG00000059075	110	48	28.265	12.04	-1.23118	0.000227658	0.00502118	yes	nip7	NIP7, nucleolar pre-rRNA processing protein [Source:ZFIN;Acc:ZDB-GENE-050522-256]	-	GO:0005575//cellular_component;GO:0005622//intracellular;GO:0005623//cell;GO:0005634//nucleus;GO:0043226//organelle;GO:0005730//nucleolus	GO:0003674//molecular_function;GO:0003723//RNA binding	GO:0008150//biological_process;GO:0022607//cellular component assembly;GO:0022618//ribonucleoprotein complex assembly;GO:0042254//ribosome biogenesis;GO:0065003
ENSDARG00000063177	293	124	25.755	10.975	-1.23063	3.37318e-06	0.000135499	yes	manf	mesencephalic astrocyte-derived neurotrophic factor [Source:ZFIN;Acc:ZDB-GENE-060929-640]	-	GO:0005575//cellular_component;GO:0005575//cellular_component	GO:0003674//molecular_function;GO:0003674//molecular_function	GO:0071542//dopaminergic neuron differentiation;GO:0008150//biological_process;GO:0030154//cell differentiation;GO:0048856//anatomical structure development
ENSDARG00000068886	226.5	95	79.15	33.765	-1.22906	3.53041e-06	0.000141162	yes	mrpl14	mitochondrial ribosomal protein L14 [Source:ZFIN;Acc:ZDB-GENE-040426-1066]	-	GO:0005575//cellular_component;GO:0005622//intracellular;GO:0005623//cell;GO:0005737//cytoplasm;GO:0005840//ribosome;GO:0043226//organelle;GO:0005739//mitochondrion	GO:0003674//molecular_function;GO:0003735//structural constituent of ribosome;GO:0005198//structural molecule activity	GO:0006412//translation;GO:0008150//biological_process;GO:0009058//biosynthetic process
ENSDARG00000099880	47	20	6.485	2.77	-1.22722	0.00418401	0.0496935	yes	SP6	Sp6 transcription factor [Source:HGNC Symbol;Acc:HGNC:14530]	-	-	GO:0046872//metal ion binding;GO:0003676//nucleic acid binding;GO:0003674//molecular_function;GO:0043167//ion binding;GO:0046872//metal ion binding;GO:0003676//nucleic acid binding;GO:0003674//molecular_function;GO:0043167//ion binding	-
ENSDARG00000088711	873	370	178.12	76.145	-1.22603	1.37767e-08	9.42672e-07	yes	lgals1l1	-	-	GO:0005575//cellular_component;GO:0005575//cellular_component	GO:0016936//galactoside binding;GO:0030246//carbohydrate binding;GO:0003674//molecular_function	GO:0008150//biological_process;GO:0008150//biological_process
ENSDARG00000037178	82	39	6.935	2.965	-1.22586	0.00123439	0.0197669	yes	zic2b	zic family member 2 (odd-paired homolog, Drosophila) b [Source:ZFIN;Acc:ZDB-GENE-030219-92]	ko04340//Hedgehog signaling pathway	-	GO:0046872//metal ion binding;GO:0003676//nucleic acid binding;GO:0003674//molecular_function;GO:0043167//ion binding	GO:0030902//hindbrain development;GO:0048385//regulation of retinoic acid receptor signaling pathway;GO:0014032//neural crest cell development;GO:0048703//embryonic viscerocranium morphogenesis;GO:0008150//biological_process;GO:0009790//embryo development;GO:0048856//anatomical structure development;GO:0030154//cell differentiation
ENSDARG00000015221	104.5	43.5	10.13	4.34	-1.22287	0.000485304	0.00924065	yes	nsrp1	-	-	-	-	-
ENSDARG00000069920	414.5	173	211.585	90.73	-1.22159	2.23281e-08	1.46993e-06	yes	cox17	-	ko01100//Metabolic pathways;ko00190//Oxidative phosphorylation	GO:0005758//mitochondrial intermembrane space;GO:0005575//cellular_component;GO:0005622//intracellular;GO:0005623//cell;GO:0005737//cytoplasm;GO:0005739//mitochondrion;GO:0043226//organelle	GO:0016531//copper chaperone activity;GO:0005507//copper ion binding;GO:0003674//molecular_function;GO:0043167//ion binding	GO:0006825//copper ion transport;GO:0046688//response to copper ion;GO:0008150//biological_process;GO:0006810//transport
ENSDARG00000035332	59.5	26	5.385	2.31	-1.22105	0.000793225	0.0137405	yes	C10H21orf59	-	-	-	-	-
ENSDARG00000070230	171	72	8.415	3.61	-1.22096	8.1851e-05	0.00211623	yes	aldh1l2	aldehyde dehydrogenase 1 family, member L2 [Source:ZFIN;Acc:ZDB-GENE-100426-6]	ko00670//One carbon pool by folate	GO:0005575//cellular_component;GO:0005622//intracellular;GO:0005623//cell;GO:0005737//cytoplasm	GO:0003674//molecular_function;GO:0008168//methyltransferase activity;GO:0016491//oxidoreductase activity	GO:0008150//biological_process;GO:0009058//biosynthetic process;GO:0044281//small molecule metabolic process
ENSDARG00000070168	43.5	19	6.575	2.825	-1.21874	0.00364675	0.0447392	yes	sod3a	superoxide dismutase 3, extracellular a [Source:ZFIN;Acc:ZDB-GENE-050309-208]	-	GO:0005737//cytoplasm;GO:0005615//extracellular space;GO:0005575//cellular_component;GO:0005576//extracellular region;GO:0005615//extracellular space;GO:0005622//intracellular;GO:0005623//cell;GO:0005737//cytoplasm	GO:0005507//copper ion binding;GO:0046872//metal ion binding;GO:0004784//superoxide dismutase activity;GO:0008270//zinc ion binding;GO:0016491//oxidoreductase activity;GO:0003674//molecular_function;GO:0043167//ion binding	GO:0019430//removal of superoxide radicals;GO:0055114//oxidation-reduction process;GO:0006801//superoxide metabolic process;GO:0008150//biological_process;GO:0006950//response to stress
ENSDARG00000023003	101.5	43	25.03	10.79	-1.21396	0.000109277	0.00270033	yes	ccdc12	coiled-coil domain containing 12 [Source:ZFIN;Acc:ZDB-GENE-040801-108]	ko03040//Spliceosome	GO:0005575//cellular_component;GO:0005575//cellular_component	GO:0003674//molecular_function;GO:0003674//molecular_function	GO:0008150//biological_process;GO:0008150//biological_process
ENSDARG00000035427	119	51	12.35	5.325	-1.21366	0.00037856	0.00760328	yes	surf6	surfeit 6 [Source:ZFIN;Acc:ZDB-GENE-040426-1333]	-	-	-	GO:0007507//heart development;GO:0008150//biological_process;GO:0048856//anatomical structure development;GO:0007507//heart development;GO:0008150//biological_process;GO:0048856//anatomical structure development
ENSDARG00000055463	89.5	38.5	4.22	1.82	-1.2133	0.000245412	0.00534047	yes	lrit3a	info leucine-rich repeat, immunoglobulin-like and transmembrane domains 3a [Source:ZFIN;Acc:ZDB-GENE-080723-63]	-	GO:0005575//cellular_component;GO:0005575//cellular_component	-	GO:0008150//biological_process;GO:0008150//biological_process
ENSDARG00000043395	70.5	30	6.65	2.87	-1.2123	0.000451355	0.00875507	yes	crip3	cysteine-rich protein 3 [Source:ZFIN;Acc:ZDB-GENE-130530-620]	-	-	GO:0003674//molecular_function;GO:0043167//ion binding	-
ENSDARG00000100025	63	27	8.29	3.58	-1.21141	0.00102848	0.0170742	yes	C24H16orf91	-	-	-	-	-
ENSDARG00000044143	66	29	2.125	0.92	-1.20776	0.000994179	0.0165971	yes	nol8	-	-	-	GO:0003676//nucleic acid binding;GO:0000166//nucleotide binding;GO:0003674//molecular_function	-
ENSDARG00000101481	240.5	103.5	29.665	12.855	-1.20643	2.93822e-06	0.000120439	yes	rbp5	retinol binding protein 1a, cellular [Source:ZFIN;Acc:ZDB-GENE-020320-1]	-	-	GO:0005215//transporter activity;GO:0008289//lipid binding;GO:0003674//molecular_function	GO:0006810//transport;GO:0008150//biological_process
ENSDARG00000069099	337.5	144.5	44.395	19.25	-1.20554	5.10181e-07	2.53825e-05	yes	tmco1	-	-	GO:0016021//integral component of membrane;GO:0016020//membrane;GO:0005575//cellular_component	GO:0003674//molecular_function;GO:0003674//molecular_function	GO:0008150//biological_process;GO:0008150//biological_process
ENSDARG00000104540	99.5	44	7.345	3.19	-1.20321	0.00030593	0.00639321	yes	cyp2aa4	-	-	-	-	-
ENSDARG00000094324	253	109.5	6.405	2.785	-1.20152	1.7727e-06	7.63873e-05	yes	efemp2a	EGF containing fibulin-like extracellular matrix protein 2a [Source:ZFIN;Acc:ZDB-GENE-041212-8]	-	-	GO:0005509//calcium ion binding;GO:0003674//molecular_function;GO:0043167//ion binding	-
ENSDARG00000023299	477.5	205.5	119.28	51.9	-1.20055	1.05941e-07	6.07004e-06	yes	nhp2l1b	NHP2 non-histone chromosome protein 2-like 1b (S. cerevisiae) [Source:ZFIN;Acc:ZDB-GENE-030131-9670]	ko03040//Spliceosome;ko03008//Ribosome biogenesis in eukaryotes	GO:0030529//ribonucleoprotein complex;GO:0005730//nucleolus;GO:0005575//cellular_component;GO:0005622//intracellular;GO:0005623//cell;GO:0005634//nucleus;GO:0043226//organelle	GO:0003723//RNA binding;GO:0003674//molecular_function	GO:0061053//somite development;GO:0042254//ribosome biogenesis;GO:0008150//biological_process;GO:0009790//embryo development;GO:0048856//anatomical structure development
ENSDARG00000055760	195	84.5	8.695	3.785	-1.19989	7.63766e-06	0.000276547	yes	srm	spermidine synthase [Source:ZFIN;Acc:ZDB-GENE-040426-1183]	ko01100//Metabolic pathways;ko00330//Arginine and proline metabolism;ko00480//Glutathione metabolism;ko00270//Cysteine and methionine metabolism;ko00410//beta-Alanine metabolism	GO:0005575//cellular_component;GO:0005575//cellular_component	GO:0003824//catalytic activity;GO:0016740//transferase activity;GO:0003674//molecular_function	GO:0006595//polyamine metabolic process;GO:0008150//biological_process;GO:0034641//cellular nitrogen compound metabolic process
ENSDARG00000098408	105	46	5.155	2.245	-1.19926	0.00277475	0.0364422	yes	stbd1	starch binding domain 1 [Source:ZFIN;Acc:ZDB-GENE-120817-2]	-	-	GO:0030246//carbohydrate binding;GO:2001070//starch binding;GO:0003674//molecular_function	-
ENSDARG00000011673	42	18	7.21	3.14	-1.19923	0.00271941	0.0358781	yes	si:ch211-246m6.5	-	-	-	-	-
ENSDARG00000038027	132.5	63.5	15.58	6.795	-1.19715	0.000433725	0.00849528	yes	nol12	nucleolar protein 12 [Source:ZFIN;Acc:ZDB-GENE-040426-1035]	-	GO:0005575//cellular_component;GO:0005622//intracellular;GO:0005623//cell;GO:0005634//nucleus;GO:0005730//nucleolus;GO:0043226//organelle;GO:0005575//cellular_component;GO:0005622//intracellular;GO:0005623//cell;GO:0005634//nucleus;GO:0005730//nucleolus;GO:0043226//organelle	GO:0003674//molecular_function;GO:0003723//RNA binding;GO:0019843//rRNA binding;GO:0003674//molecular_function;GO:0003723//RNA binding;GO:0019843//rRNA binding	GO:0008150//biological_process;GO:0008150//biological_process
ENSDARG00000103981	96	42	15.44	6.735	-1.19692	0.00285761	0.0373236	yes	bhlha9	-	-	-	-	-
ENSDARG00000037997	4125	1772	250.145	109.295	-1.19454	9.62102e-07	4.44716e-05	yes	tubb5	tubulin, beta 5 [Source:ZFIN;Acc:ZDB-GENE-031110-4]	ko04145//Phagosome;ko04540//Gap junction;ko05130//Pathogenic Escherichia coli infection	GO:0005856//cytoskeleton;GO:0043234//protein complex;GO:0005874//microtubule;GO:0005737//cytoplasm;GO:0005575//cellular_component;GO:0005622//intracellular;GO:0005623//cell;GO:0005856//cytoskeleton;GO:0043226//organelle	GO:0000166//nucleotide binding;GO:0003924//GTPase activity;GO:0005525//GTP binding;GO:0005200//structural constituent of cytoskeleton;GO:0005198//structural molecule activity;GO:0003674//molecular_function;GO:0005198//structural molecule activity;GO:0043167//ion binding	GO:0007017//microtubule-based process;GO:0051258//protein polymerization;GO:0006461//protein complex assembly;GO:0008150//biological_process;GO:0022607//cellular component assembly;GO:0065003
ENSDARG00000099960	148	60	13.955	6.1	-1.1939	7.3487e-06	0.000267945	yes	elovl1a	ELOVL fatty acid elongase 1a [Source:ZFIN;Acc:ZDB-GENE-041010-66]	-	GO:0016020//membrane;GO:0016021//integral component of membrane;GO:0005575//cellular_component	GO:0016740//transferase activity;GO:0003674//molecular_function	GO:0006629//lipid metabolic process;GO:0006631//fatty acid metabolic process;GO:0006633//fatty acid biosynthetic process;GO:0008150//biological_process;GO:0009058//biosynthetic process;GO:0044281//small molecule metabolic process
ENSDARG00000077405	441.5	185.5	11.055	4.84	-1.19162	0.0018396	0.027034	yes	PSIP1 (1 of 2)	-	-	-	-	-
ENSDARG00000030270	4082	1765.5	594.87	260.5	-1.19129	3.28048e-10	2.69786e-08	yes	tnnt3a	-	-	GO:0005861//troponin complex;GO:0005575//cellular_component;GO:0005622//intracellular;GO:0005623//cell;GO:0005737//cytoplasm;GO:0005856//cytoskeleton;GO:0043226//organelle;GO:0043234//protein complex	-	GO:0030239//myofibril assembly;GO:0045214//sarcomere organization;GO:0006937//regulation of muscle contraction;GO:0006942//regulation of striated muscle contraction;GO:0008150//biological_process;GO:0007010//cytoskeleton organization;GO:0022607//cellular component assembly;GO:0030154//cell differentiation;GO:0048646//anatomical structure formation involved in morphogenesis;GO:0048856//anatomical …
ENSDARG00000007285	317.5	139	120.855	52.975	-1.18989	1.20695e-06	5.47222e-05	yes	mrpl57	-	-	GO:0005575//cellular_component;GO:0005622//intracellular;GO:0005623//cell;GO:0005737//cytoplasm;GO:0005739//mitochondrion;GO:0043226//organelle;GO:0005840//ribosome	-	-
ENSDARG00000037158	152	66.5	10.285	4.51	-1.18934	4.08566e-05	0.00117824	yes	rcc1	regulator of chromosome condensation 1 [Source:ZFIN;Acc:ZDB-GENE-040426-2216]	-	GO:0005575//cellular_component;GO:0005575//cellular_component	-	GO:0008150//biological_process;GO:0008150//biological_process
ENSDARG00000040695	115	43	13.395	5.875	-1.18903	8.39684e-06	0.000301108	yes	fkbp14	FK506 binding protein 14 [Source:ZFIN;Acc:ZDB-GENE-040801-210]	-	GO:0005789//endoplasmic reticulum membrane;GO:0005575//cellular_component;GO:0005622//intracellular;GO:0005623//cell;GO:0005737//cytoplasm;GO:0005783//endoplasmic reticulum;GO:0043226//organelle	GO:0005528//FK506 binding;GO:0003755//peptidyl-prolyl cis-trans isomerase activity;GO:0005509//calcium ion binding;GO:0003674//molecular_function;GO:0043167//ion binding;GO:0016853//isomerase activity	GO:0061077//chaperone-mediated protein folding;GO:0006457//protein folding;GO:0000413//protein peptidyl-prolyl isomerization;GO:0006464//cellular protein modification process;GO:0008150//biological_process
ENSDARG00000053652	116	50.5	16.82	7.38	-1.18848	8.20007e-05	0.00211623	yes	ndufaf6	NADH dehydrogenase (ubiquinone) complex I, assembly factor 6 [Source:ZFIN;Acc:ZDB-GENE-100112-1]	-	-	GO:0003674//molecular_function	-
ENSDARG00000030630	61.5	28	3.43	1.505	-1.18845	0.00322679	0.0410354	yes	mfsd2aa	-	-	-	-	-
ENSDARG00000024195	250	101	20.405	8.965	-1.18655	7.53349e-07	3.60363e-05	yes	znf395b	zinc finger protein 395b [Source:ZFIN;Acc:ZDB-GENE-041001-193]	-	-	GO:0046872//metal ion binding;GO:0003674//molecular_function;GO:0043167//ion binding	-
ENSDARG00000011999	129	56	31.205	13.715	-1.18602	5.76526e-05	0.00157548	yes	ybey	ybeY metallopeptidase [Source:ZFIN;Acc:ZDB-GENE-030131-437]	-	-	GO:0004222//metalloendopeptidase activity;GO:0003674//molecular_function;GO:0008233//peptidase activity	GO:0006364//rRNA processing;GO:0008150//biological_process;GO:0034641//cellular nitrogen compound metabolic process;GO:0042254//ribosome biogenesis
ENSDARG00000071212	194	85	9.275	4.08	-1.18478	2.51286e-05	0.000779883	yes	p3h1	-	-	-	-	-
ENSDARG00000093957	560	243	124.13	54.615	-1.18448	2.6669e-08	1.74251e-06	yes	si:dkey-251i10.2	si:dkey-251i10.2 [Source:ZFIN;Acc:ZDB-GENE-050506-102]	-	GO:0005575//cellular_component	GO:0003674//molecular_function	-
ENSDARG00000040334	1806.5	786	119.18	52.44	-1.1844	3.46433e-10	2.8401e-08	yes	mat2aa	-	-	-	-	-
ENSDARG00000038862	151	62	5.815	2.56	-1.18364	6.47625e-06	0.000240507	yes	kcnb2	-	-	GO:0005575//cellular_component;GO:0005623//cell;GO:0005886//plasma membrane;GO:0043234//protein complex;GO:0005575//cellular_component;GO:0005623//cell;GO:0005886//plasma membrane;GO:0043234//protein complex	GO:0003674//molecular_function;GO:0022857//transmembrane transporter activity;GO:0003674//molecular_function;GO:0022857//transmembrane transporter activity	GO:0006810//transport;GO:0008150//biological_process;GO:0006461//protein complex assembly;GO:0022607//cellular component assembly;GO:0065003;GO:0055085//transmembrane transport;GO:0006810//transport;GO:0008150//biological_process;GO:0006461//protein complex assembly;GO:0022607//cellular component assembly;GO:0065003;GO:0055085//transmembrane transport
ENSDARG00000034424	405.5	168.5	26.685	11.775	-1.1803	1.61373e-08	1.0899e-06	yes	atp1b2b	ATPase, Na+/K+ transporting, beta 2b polypeptide [Source:ZFIN;Acc:ZDB-GENE-010718-1]	ko04260//Cardiac muscle contraction;ko04972//Pancreatic secretion;ko04971//Gastric acid secretion;ko04970//Salivary secretion;ko04976//Bile secretion;ko04961//Endocrine and other factor-regulated calcium reabsorption;ko04973//Carbohydrate digestion and absorption;ko04960//Aldosterone-regulated sodium reabsorption;ko04974//Protein digestion and absorption;ko04964//Proximal tubule bicarbonate recla…	GO:0005890//sodium:potassium-exchanging ATPase complex;GO:0005575//cellular_component;GO:0005623//cell;GO:0005886//plasma membrane;GO:0043234//protein complex	-	GO:0048840//otolith development;GO:0042472//inner ear morphogenesis;GO:0007507//heart development;GO:0001964//startle response;GO:0006814//sodium ion transport;GO:0048923//posterior lateral line neuromast hair cell differentiation;GO:0006813//potassium ion transport;GO:0006810//transport;GO:0008150//biological_process;GO:0030154//cell differentiation;GO:0048856//anatomical structure development;G…
ENSDARG00000076290	1201.5	525.5	63.865	28.185	-1.1801	3.1344e-05	0.00093924	yes	calr	calreticulin [Source:ZFIN;Acc:ZDB-GENE-030131-4042]	ko04141//Protein processing in endoplasmic reticulum;ko04145//Phagosome;ko05142//Chagas disease (American trypanosomiasis);ko04612//Antigen processing and presentation	GO:0005783//endoplasmic reticulum;GO:0005575//cellular_component;GO:0005622//intracellular;GO:0005623//cell;GO:0005737//cytoplasm;GO:0043226//organelle	GO:0051082//unfolded protein binding;GO:0005509//calcium ion binding;GO:0003674//molecular_function;GO:0043167//ion binding	GO:0006457//protein folding;GO:0008150//biological_process
ENSDARG00000019713	170	72.5	6.765	2.99	-1.17794	2.29717e-05	0.000722403	yes	oatx	-	-	-	-	-
ENSDARG00000099358	264.5	122.5	24.8	10.965	-1.17743	4.09723e-06	0.00016047	yes	hccsb	-	ko00860//Porphyrin and chlorophyll metabolism	GO:0005739//mitochondrion;GO:0005575//cellular_component;GO:0005622//intracellular;GO:0005623//cell;GO:0005737//cytoplasm;GO:0043226//organelle	GO:0004408//holocytochrome-c synthase activity;GO:0003674//molecular_function;GO:0016829//lyase activity	-
ENSDARG00000069241	48	21	10.97	4.855	-1.17602	0.00321654	0.040925	yes	ttc32	-	-	-	-	-
ENSDARG00000022525	61.5	27	9.87	4.37	-1.17542	0.00175395	0.0260099	yes	mchr1b	-	-	GO:0005575//cellular_component	GO:0003674//molecular_function;GO:0004871//signal transducer activity	GO:0007165//signal transduction;GO:0008150//biological_process
ENSDARG00000036775	49	21.5	10.495	4.65	-1.1744	0.00395219	0.0474809	yes	dtd2	-	-	-	-	-
ENSDARG00000017741	1124.5	514	102.855	45.585	-1.17398	1.45881e-08	9.95583e-07	yes	g3bp1	-	-	GO:0005622//intracellular;GO:0005575//cellular_component;GO:0005623//cell	GO:0000166//nucleotide binding;GO:0003676//nucleic acid binding;GO:0003674//molecular_function	GO:0006810//transport;GO:0008150//biological_process
ENSDARG00000104654	61.5	25.5	82.15	36.41	-1.17393	0.00149823	0.0231017	yes	zgc:194626	zgc:194626 [Source:ZFIN;Acc:ZDB-GENE-081022-131]	-	GO:0005575//cellular_component;GO:0005575//cellular_component	GO:0003674//molecular_function;GO:0003674//molecular_function	GO:0042742//defense response to bacterium;GO:0006950//response to stress;GO:0008150//biological_process
ENSDARG00000040440	549.5	240.5	141.84	62.87	-1.17382	8.94834e-08	5.24232e-06	yes	snrpd2	small nuclear ribonucleoprotein D2 polypeptide [Source:ZFIN;Acc:ZDB-GENE-040914-10]	ko03040//Spliceosome	GO:0030529//ribonucleoprotein complex;GO:0030532//small nuclear ribonucleoprotein complex;GO:0019012//virion;GO:0019013//viral nucleocapsid;GO:0005575//cellular_component;GO:0005622//intracellular;GO:0005623//cell;GO:0005634//nucleus;GO:0043226//organelle	-	GO:0008380//RNA splicing;GO:0008150//biological_process;GO:0034641//cellular nitrogen compound metabolic process
ENSDARG00000005738	157.5	69	18.595	8.245	-1.17332	0.00130744	0.0206826	yes	rpf1	-	-	-	-	-
ENSDARG00000074790	801.5	353	107.36	47.615	-1.17297	1.12201e-08	7.80019e-07	yes	C23H20orf24	-	-	-	-	-
ENSDARG00000017605	43	19	4.775	2.12	-1.17144	0.00331536	0.041814	yes	rpp40	ribonuclease P/MRP 40 subunit [Source:ZFIN;Acc:ZDB-GENE-040625-161]	ko03013//RNA transport;ko03008//Ribosome biogenesis in eukaryotes	GO:0005575//cellular_component;GO:0005575//cellular_component	GO:0003674//molecular_function;GO:0003674//molecular_function	GO:0008150//biological_process;GO:0008150//biological_process
ENSDARG00000062481	39	16	3.31	1.47	-1.17102	0.00175515	0.026013	yes	mlphb	-	-	-	-	-
ENSDARG00000102765	434	204	17.56	7.805	-1.16982	4.65032e-07	2.34042e-05	yes	lonp1	lon peptidase 1, mitochondrial [Source:ZFIN;Acc:ZDB-GENE-030131-4006]	-	GO:0005759//mitochondrial matrix;GO:0005739//mitochondrion;GO:0005575//cellular_component;GO:0005622//intracellular;GO:0005623//cell;GO:0005737//cytoplasm;GO:0043226//organelle	GO:0003677//DNA binding;GO:0004176//ATP-dependent peptidase activity;GO:0004252//serine-type endopeptidase activity;GO:0005524//ATP binding;GO:0043565//sequence-specific DNA binding;GO:0003697//single-stranded DNA binding;GO:0016787//hydrolase activity;GO:0008233//peptidase activity;GO:0070361//mitochondrial light strand promoter anti-sense binding;GO:0000166//nucleotide binding;GO:0008236//serin…	GO:0034599//cellular response to oxidative stress;GO:0090296//regulation of mitochondrial DNA replication;GO:0006515//misfolded or incompletely synthesized protein catabolic process;GO:0006508//proteolysis;GO:0030163//protein catabolic process;GO:0070407//oxidation-dependent protein catabolic process;GO:0007005//mitochondrion organization;GO:0051131//chaperone-mediated protein complex assembly;GO…
ENSDARG00000092337	295.5	123.5	54.1	24.065	-1.16869	2.81424e-05	0.000857095	yes	-	-	-	-	-	-
ENSDARG00000057099	131	58	7.45	3.315	-1.16823	0.000184321	0.00421513	yes	papss1	3'-phosphoadenosine 5'-phosphosulfate synthase 1 [Source:ZFIN;Acc:ZDB-GENE-080721-5]	ko01100//Metabolic pathways;ko00230//Purine metabolism;ko00450//Selenocompound metabolism;ko00920//Sulfur metabolism	GO:0005575//cellular_component;GO:0005575//cellular_component	GO:0004020//adenylylsulfate kinase activity;GO:0005524//ATP binding;GO:0004781//sulfate adenylyltransferase (ATP) activity;GO:0003674//molecular_function;GO:0016779//nucleotidyltransferase activity;GO:0043167//ion binding;GO:0016301//kinase activity	GO:0000103//sulfate assimilation;GO:0050428//3'-phosphoadenosine 5'-phosphosulfate biosynthetic process;GO:0006790//sulfur compound metabolic process;GO:0008150//biological_process;GO:0009058//biosynthetic process;GO:0034641//cellular nitrogen compound metabolic process;GO:0044281//small molecule metabolic process
[truncated: 6,206 more rows]
