# Supplementary material for: Transcriptome Analysis Reveals Increases in Visceral Lipogenesis and Storage and Activation of the Antigen Processing and Presentation Pathway during the Mouth-Opening Stage in Zebrafish Larvae
Source: Int J Mol Sci. 2017 Jul 31;18(8):1634. doi: 10.3390/ijms18081634 (PMC5578024; doi:10.3390/ijms18081634)
Supplement: Supplementary file 1 [file ijms-18-01634-s001.zip › Table S3.xlsx]

## Sheet: Sheet1
Table S3 All DEGs during the mouth-opening stage
id	ENDO_fpkm	MIX_fpkm	EXO_fpkm	Description	Pathway	GO Component	GO Function	GO Process
ENSDARG00000000019	29.18	24.255	13.74	ubiquitin-conjugating enzyme E2H (UBC8 homolog, yeast) [Source:ZFIN;Acc:ZDB-GENE-030616-67]	ko04120//Ubiquitin mediated proteolysis	GO:0005737//cytoplasm;GO:0005575//cellular_component;GO:0005622//intracellular;GO:0005623//cell;GO:0005737//cytoplasm	GO:0016874//ligase activity;GO:0031625//ubiquitin protein ligase binding;GO:0003674//molecular_function;GO:0019899//enzyme binding	GO:0006511//ubiquitin-dependent protein catabolic process;GO:0008150//biological_process;GO:0009056//catabolic process
ENSDARG00000000175	4.595	2.925	1.805	-	-	-	-	-
ENSDARG00000000369	11.265	10.715	3.785	protein kinase, AMP-activated, gamma 3b non-catalytic subunit [Source:ZFIN;Acc:ZDB-GENE-060421-6938]	ko04910//Insulin signaling pathway;ko05410//Hypertrophic cardiomyopathy (HCM);ko04920//Adipocytokine signaling pathway	GO:0005575//cellular_component;GO:0005575//cellular_component	-	GO:0008150//biological_process;GO:0008150//biological_process
ENSDARG00000000551	22.365	8.295	15.69	-	-	GO:0016020//membrane;GO:0016021//integral component of membrane;GO:0005575//cellular_component	GO:0015293//symporter activity;GO:0017153//sodium:dicarboxylate symporter activity;GO:0003674//molecular_function;GO:0022857//transmembrane transporter activity	GO:0006810//transport;GO:0006835//dicarboxylic acid transport;GO:0008150//biological_process
ENSDARG00000000563	1.23	4.625	5.735	-	-	-	-	-
ENSDARG00000000690	7.18	5.13	2.915	synaptophysin-like 2b [Source:ZFIN;Acc:ZDB-GENE-050417-309]	-	GO:0030285//integral component of synaptic vesicle membrane;GO:0016021//integral component of membrane;GO:0016020//membrane;GO:0008021//synaptic vesicle;GO:0005575//cellular_component;GO:0005622//intracellular;GO:0005623//cell;GO:0005737//cytoplasm;GO:0016023//cytoplasmic membrane-bounded vesicle;GO:0043226//organelle	GO:0005215//transporter activity;GO:0003674//molecular_function	GO:0006810//transport;GO:0008150//biological_process
ENSDARG00000000887	5.795	1.885	1.2	-	-	GO:0005575//cellular_component;GO:0005575//cellular_component	-	-
ENSDARG00000001154	1.775	1.82	4.3	RIMS binding protein 2 [Source:ZFIN;Acc:ZDB-GENE-040724-96]	-	-	GO:0005515//protein binding;GO:0003674//molecular_function	-
ENSDARG00000001210	44.8	36.11	21.07	ADP-ribosylation factor-like 14 effector protein [Source:ZFIN;Acc:ZDB-GENE-060825-216]	-	-	GO:0003676//nucleic acid binding;GO:0003674//molecular_function	GO:0008150//biological_process;GO:0008150//biological_process
ENSDARG00000001303	0.19	0.375	1.585	-	ko03050//Proteasome	GO:0005737//cytoplasm;GO:0005839//proteasome core complex;GO:0005634//nucleus;GO:0000502//proteasome complex;GO:0005575//cellular_component;GO:0005622//intracellular;GO:0005623//cell;GO:0043234//protein complex;GO:0043226//organelle	GO:0004298//threonine-type endopeptidase activity;GO:0004175//endopeptidase activity;GO:0008233//peptidase activity;GO:0016787//hydrolase activity;GO:0003674//molecular_function	GO:0006508//proteolysis;GO:0051603//proteolysis involved in cellular protein catabolic process;GO:0008150//biological_process;GO:0009056//catabolic process
ENSDARG00000001313	6.84	7.58	0.98	G2/M-phase specific E3 ubiquitin protein ligase [Source:ZFIN;Acc:ZDB-GENE-030616-400]	-	-	GO:0046872//metal ion binding;GO:0004842//ubiquitin-protein ligase activity;GO:0016874//ligase activity;GO:0008270//zinc ion binding;GO:0003674//molecular_function;GO:0043167//ion binding;GO:0005515//protein binding	-
ENSDARG00000001437	6.44	5.885	32.24	solute carrier family 2 (facilitated glucose transporter), member 1a [Source:ZFIN;Acc:ZDB-GENE-030131-3158]	ko05200//Pathways in cancer;ko05211//Renal cell carcinoma;ko04920//Adipocytokine signaling pathway;ko04976//Bile secretion	GO:0005886//plasma membrane;GO:0016021//integral component of membrane;GO:0016020//membrane;GO:0005887//integral component of plasma membrane;GO:0005575//cellular_component;GO:0005623//cell;GO:0005886//plasma membrane	GO:0005355//glucose transmembrane transporter activity;GO:0005351//sugar:proton symporter activity;GO:0005215//transporter activity;GO:0022857//transmembrane transporter activity;GO:0022891//substrate-specific transmembrane transporter activity;GO:0003674//molecular_function	GO:0061300//cerebellum vasculature development;GO:0035428//hexose transmembrane transport;GO:0006810//transport;GO:0055085//transmembrane transport;GO:0043066//negative regulation of apoptotic process;GO:0046323//glucose import;GO:0001885//endothelial cell development;GO:0008643//carbohydrate transport;GO:0008150//biological_process;GO:0030154//cell differentiation;GO:0048856//anatomical structur…
ENSDARG00000001442	1.39	2.195	0.99	-	-	-	-	-
ENSDARG00000001549	4.15	4.56	2.08	sp3a transcription factor [Source:ZFIN;Acc:ZDB-GENE-070410-111]	-	GO:0005634//nucleus;GO:0005575//cellular_component;GO:0005622//intracellular;GO:0005623//cell;GO:0043226//organelle	GO:0003700//sequence-specific DNA binding transcription factor activity;GO:0000987//core promoter proximal region sequence-specific DNA binding;GO:0000981//sequence-specific DNA binding RNA polymerase II transcription factor activity;GO:0046872//metal ion binding;GO:0003676//nucleic acid binding;GO:0003674//molecular_function;GO:0043167//ion binding;GO:0001071//nucleic acid binding transcription …	GO:0006357//regulation of transcription from RNA polymerase II promoter;GO:0006355//regulation of transcription, DNA-templated;GO:0008150//biological_process
ENSDARG00000001558	25.415	27.94	5.09	kinesin family member C1 [Source:ZFIN;Acc:ZDB-GENE-000208-21]	-	GO:0005874//microtubule;GO:0005871//kinesin complex;GO:0005575//cellular_component;GO:0005622//intracellular;GO:0005623//cell;GO:0005856//cytoskeleton;GO:0043226//organelle;GO:0043234//protein complex;GO:0005874//microtubule;GO:0005871//kinesin complex;GO:0005575//cellular_component;GO:0005622//intracellular;GO:0005623//cell;GO:0005856//cytoskeleton;GO:0043226//organelle;GO:0043234//protein compl…	GO:0005524//ATP binding;GO:0003777//microtubule motor activity;GO:0008017//microtubule binding;GO:0016887//ATPase activity;GO:0008569//minus-end-directed microtubule motor activity;GO:0000166//nucleotide binding;GO:0003674//molecular_function;GO:0016887//ATPase activity;GO:0008092//cytoskeletal protein binding;GO:0043167//ion binding;GO:0005524//ATP binding;GO:0003777//microtubule motor activity;…	GO:0000070//mitotic sister chromatid segregation;GO:0007018//microtubule-based movement;GO:0051225//spindle assembly;GO:0006461//protein complex assembly;GO:0007010//cytoskeleton organization;GO:0007049//cell cycle;GO:0008150//biological_process;GO:0022607//cellular component assembly;GO:0065003;GO:0007059//chromosome segregation;GO:0007067//mitosis;GO:0051276//chromosome organization;GO:0000070/…
ENSDARG00000001559	0.765	0.97	1.695	-	-	-	-	-
ENSDARG00000001572	0.125	0.21	0.665	-	-	-	GO:0005515//protein binding;GO:0003674//molecular_function	-
ENSDARG00000001656	0.075	0.44	0.81	proteasome (prosome, macropain) subunit, beta type, 10 [Source:ZFIN;Acc:ZDB-GENE-001208-2]	ko03050//Proteasome	GO:0000502//proteasome complex;GO:0005839//proteasome core complex;GO:0005737//cytoplasm;GO:0005634//nucleus;GO:0005575//cellular_component;GO:0005622//intracellular;GO:0005623//cell;GO:0043226//organelle;GO:0043234//protein complex	GO:0016787//hydrolase activity;GO:0004175//endopeptidase activity;GO:0004298//threonine-type endopeptidase activity;GO:0008233//peptidase activity;GO:0003674//molecular_function	GO:0051603//proteolysis involved in cellular protein catabolic process;GO:0006508//proteolysis;GO:0008150//biological_process;GO:0009056//catabolic process
ENSDARG00000001712	0.43	0.615	0.935	-	ko04270//Vascular smooth muscle contraction	-	-	-
ENSDARG00000001733	10.3	7.285	4.685	-	-	GO:0005575//cellular_component;GO:0005622//intracellular;GO:0005623//cell;GO:0005737//cytoplasm	GO:0005515//protein binding;GO:0003674//molecular_function	GO:0006810//transport;GO:0008150//biological_process;GO:0016192//vesicle-mediated transport
ENSDARG00000001754	14.79	10.245	27.225	-	-	-	-	-
ENSDARG00000001760	8.545	4.755	3.805	-	-	-	-	-
ENSDARG00000001767	4.525	6.765	2.635	solute carrier family 29 (equilibrative nucleoside transporter), member 2 [Source:ZFIN;Acc:ZDB-GENE-050220-15]	-	GO:0005887//integral component of plasma membrane;GO:0016021//integral component of membrane;GO:0005575//cellular_component;GO:0005623//cell;GO:0005886//plasma membrane	GO:0005337//nucleoside transmembrane transporter activity;GO:0003674//molecular_function;GO:0022857//transmembrane transporter activity	GO:0015858//nucleoside transport;GO:0006810//transport;GO:0008150//biological_process
ENSDARG00000001782	5.46	2.225	0.605	protein kinase, cAMP-dependent, catalytic, beta a [Source:ZFIN;Acc:ZDB-GENE-040426-1351]	ko04010//MAPK signaling pathway;ko04020//Calcium signaling pathway;ko04310//Wnt signaling pathway;ko04062//Chemokine signaling pathway;ko04910//Insulin signaling pathway;ko04114//Oocyte meiosis;ko04270//Vascular smooth muscle contraction;ko04916//Melanogenesis;ko04725//Cholinergic synapse;ko04912//GnRH signaling pathway;ko04540//Gap junction;ko05414//Dilated cardiomyopathy;ko04724//Glutamatergic …	GO:0005575//cellular_component;GO:0005575//cellular_component	GO:0016740//transferase activity;GO:0005524//ATP binding;GO:0004672//protein kinase activity;GO:0004674//protein serine/threonine kinase activity;GO:0016301//kinase activity;GO:0000166//nucleotide binding;GO:0016772//transferase activity, transferring phosphorus-containing groups;GO:0003674//molecular_function;GO:0043167//ion binding	GO:0006468//protein phosphorylation;GO:0016310//phosphorylation;GO:0008150//biological_process;GO:0006464//cellular protein modification process
ENSDARG00000001859	3.83	2.42	1.07	-	-	-	-	-
ENSDARG00000001870	96.785	188.49	230.515	ATPase, Na+/K+ transporting, alpha 1a polypeptide, tandem duplicate 4 [Source:ZFIN;Acc:ZDB-GENE-001212-4]	-	GO:0016020//membrane;GO:0016021//integral component of membrane;GO:0005575//cellular_component	GO:0016787//hydrolase activity;GO:0000166//nucleotide binding;GO:0005524//ATP binding;GO:0046872//metal ion binding;GO:0005391//sodium:potassium-exchanging ATPase activity;GO:0003674//molecular_function;GO:0016887//ATPase activity;GO:0022857//transmembrane transporter activity;GO:0043167//ion binding	GO:0006813//potassium ion transport;GO:0006814//sodium ion transport;GO:0006810//transport;GO:0008150//biological_process
ENSDARG00000001873	47.315	21.31	19.19	phosphoglycerate dehydrogenase [Source:ZFIN;Acc:ZDB-GENE-030131-647]	ko01100//Metabolic pathways;ko00260//Glycine, serine and threonine metabolism	GO:0005575//cellular_component;GO:0005575//cellular_component	GO:0016616//oxidoreductase activity, acting on the CH-OH group of donors, NAD or NADP as acceptor;GO:0051287//NAD binding;GO:0004617//phosphoglycerate dehydrogenase activity;GO:0003674//molecular_function;GO:0016491//oxidoreductase activity	GO:0055114//oxidation-reduction process;GO:0006564//L-serine biosynthetic process;GO:0008152//metabolic process;GO:0008150//biological_process;GO:0006520//cellular amino acid metabolic process;GO:0009058//biosynthetic process;GO:0044281//small molecule metabolic process
ENSDARG00000001881	0.555	1.11	2.29	calcium channel, voltage-dependent, beta 3a [Source:ZFIN;Acc:ZDB-GENE-060221-2]	ko04010//MAPK signaling pathway;ko05414//Dilated cardiomyopathy;ko04260//Cardiac muscle contraction;ko05410//Hypertrophic cardiomyopathy (HCM);ko05412//Arrhythmogenic right ventricular cardiomyopathy (ARVC)	GO:0005891//voltage-gated calcium channel complex;GO:0005575//cellular_component;GO:0005623//cell;GO:0005886//plasma membrane;GO:0043234//protein complex	GO:0005245//voltage-gated calcium channel activity;GO:0008331//high voltage-gated calcium channel activity;GO:0003674//molecular_function;GO:0022857//transmembrane transporter activity	GO:0007528//neuromuscular junction development;GO:0007268//synaptic transmission;GO:0070588//calcium ion transmembrane transport;GO:0006810//transport;GO:0008150//biological_process;GO:0055085//transmembrane transport;GO:0007267//cell-cell signaling
ENSDARG00000001889	678.575	377.445	208.42	tubulin, alpha 1a [Source:ZFIN;Acc:ZDB-GENE-090507-4]	ko04145//Phagosome;ko04540//Gap junction;ko05130//Pathogenic Escherichia coli infection	GO:0005737//cytoplasm;GO:0043234//protein complex;GO:0005874//microtubule;GO:0005856//cytoskeleton;GO:0005575//cellular_component;GO:0005622//intracellular;GO:0005623//cell;GO:0043226//organelle;GO:0005737//cytoplasm;GO:0043234//protein complex;GO:0005874//microtubule;GO:0005856//cytoskeleton;GO:0005575//cellular_component;GO:0005622//intracellular;GO:0005623//cell;GO:0043226//organelle	GO:0003924//GTPase activity;GO:0005525//GTP binding;GO:0000166//nucleotide binding;GO:0005200//structural constituent of cytoskeleton;GO:0003674//molecular_function;GO:0005198//structural molecule activity;GO:0043167//ion binding;GO:0003924//GTPase activity;GO:0005525//GTP binding;GO:0000166//nucleotide binding;GO:0005200//structural constituent of cytoskeleton;GO:0003674//molecular_function;GO:0…	GO:0021634//optic nerve formation;GO:0043066//negative regulation of apoptotic process;GO:0007017//microtubule-based process;GO:0051258//protein polymerization;GO:0006461//protein complex assembly;GO:0008150//biological_process;GO:0022607//cellular component assembly;GO:0065003;GO:0048646//anatomical structure formation involved in morphogenesis;GO:0048856//anatomical structure development;GO:002…
ENSDARG00000001897	13.325	20.43	32.97	-	ko04142//Lysosome;ko00511//Other glycan degradation	GO:0005575//cellular_component;GO:0005575//cellular_component	GO:0016160//amylase activity;GO:0015924;GO:0015927//trehalase activity;GO:0052736//beta-glucanase activity;GO:0016798//hydrolase activity, acting on glycosyl bonds;GO:0003824//catalytic activity;GO:0004559//alpha-mannosidase activity;GO:0015923//mannosidase activity;GO:0008933//lytic transglycosylase activity;GO:0015925;GO:0015928//fucosidase activity;GO:0052769;GO:0046872//metal ion binding;GO:0…	GO:0005975//carbohydrate metabolic process;GO:0006013//mannose metabolic process;GO:0008152//metabolic process;GO:0008150//biological_process
ENSDARG00000001913	4.3	3.255	1.445	palmdelphin a [Source:ZFIN;Acc:ZDB-GENE-070705-48]	-	-	-	GO:0008150//biological_process
ENSDARG00000001968	1.255	2.515	2.69	dedicator of cytokinesis 5 [Source:ZFIN;Acc:ZDB-GENE-080108-4]	-	-	GO:0005085//guanyl-nucleotide exchange factor activity;GO:0003674//molecular_function	GO:0007520//myoblast fusion;GO:0007264//small GTPase mediated signal transduction;GO:0007165//signal transduction;GO:0008150//biological_process;GO:0030154//cell differentiation;GO:0048646//anatomical structure formation involved in morphogenesis;GO:0048856//anatomical structure development
ENSDARG00000001993	25.595	19.09	10.15	myosin, heavy chain b [Source:ZFIN;Acc:ZDB-GENE-081124-1]	ko04810//Regulation of actin cytoskeleton;ko04530//Tight junction;ko04270//Vascular smooth muscle contraction;ko05414//Dilated cardiomyopathy;ko04260//Cardiac muscle contraction;ko05410//Hypertrophic cardiomyopathy (HCM);ko05416//Viral myocarditis	GO:0005575//cellular_component;GO:0005622//intracellular;GO:0005623//cell;GO:0005856//cytoskeleton;GO:0043226//organelle;GO:0043234//protein complex	GO:0003674//molecular_function;GO:0043167//ion binding;GO:0008092//cytoskeletal protein binding	-
ENSDARG00000001999	2.46	1.965	1.17	ADAM metallopeptidase with thrombospondin type 1 motif, 18 [Source:ZFIN;Acc:ZDB-GENE-070815-1]	-	GO:0031012//extracellular matrix;GO:0005575//cellular_component	GO:0004222//metalloendopeptidase activity;GO:0003674//molecular_function;GO:0008233//peptidase activity;GO:0008270//zinc ion binding;GO:0043167//ion binding	GO:0006508//proteolysis;GO:0008150//biological_process
ENSDARG00000002097	0.215	0.145	2.835	-	-	-	-	-
ENSDARG00000002165	6.215	9.25	21.775	proteasome (prosome, macropain) activator subunit 1 (PA28 alpha) [Source:ZFIN;Acc:ZDB-GENE-991110-17]	ko03050//Proteasome;ko04612//Antigen processing and presentation	GO:0008537//proteasome activator complex;GO:0000502//proteasome complex;GO:0005575//cellular_component;GO:0005622//intracellular;GO:0005623//cell;GO:0043234//protein complex	-	-
ENSDARG00000002174	7.57	7.555	2.925	integrin alpha FG-GAP repeat containing 2 [Source:ZFIN;Acc:ZDB-GENE-041008-161]	-	-	GO:0003674//molecular_function;GO:0003674//molecular_function	-
ENSDARG00000002193	1163.04	1134.62	512.54	rhodopsin [Source:ZFIN;Acc:ZDB-GENE-990415-271]	ko04744//Phototransduction	GO:0005575//cellular_component;GO:0005623//cell;GO:0005929//cilium;GO:0043226//organelle	GO:0003674//molecular_function;GO:0004871//signal transducer activity	GO:0007165//signal transduction;GO:0008150//biological_process;GO:0050877//neurological system process;GO:0006464//cellular protein modification process
ENSDARG00000002210	17.115	17.09	7.5	-	-	-	-	-
ENSDARG00000002215	16.86	10.545	5.865	RNA 3'-terminal phosphate cyclase [Source:ZFIN;Acc:ZDB-GENE-030131-9687]	-	GO:0005634//nucleus;GO:0005575//cellular_component;GO:0005622//intracellular;GO:0005623//cell;GO:0005634//nucleus;GO:0043226//organelle	GO:0005524//ATP binding;GO:0003963//RNA-3'-phosphate cyclase activity;GO:0000166//nucleotide binding;GO:0003824//catalytic activity;GO:0003723//RNA binding;GO:0003674//molecular_function;GO:0003723//RNA binding;GO:0016874//ligase activity;GO:0043167//ion binding	GO:0006396//RNA processing;GO:0008150//biological_process;GO:0034641//cellular nitrogen compound metabolic process
ENSDARG00000002219	1.655	2.23	4.225	-	-	-	-	-
ENSDARG00000002235	19.75	21.46	10.685	matrix metallopeptidase 14a (membrane-inserted) [Source:ZFIN;Acc:ZDB-GENE-030901-1]	ko04912//GnRH signaling pathway	GO:0031012//extracellular matrix;GO:0005575//cellular_component	GO:0008270//zinc ion binding;GO:0004222//metalloendopeptidase activity;GO:0005509//calcium ion binding;GO:0008237//metallopeptidase activity;GO:0016787//hydrolase activity;GO:0008233//peptidase activity;GO:0046872//metal ion binding;GO:0003674//molecular_function;GO:0043167//ion binding	GO:0009948//anterior/posterior axis specification;GO:0051216//cartilage development;GO:0048701//embryonic cranial skeleton morphogenesis;GO:0060027//convergent extension involved in gastrulation;GO:0030010//establishment of cell polarity;GO:0042074//cell migration involved in gastrulation;GO:0006508//proteolysis;GO:0003407//neural retina development;GO:0031290//retinal ganglion cell axon guidance…
ENSDARG00000002240	176.425	113.195	83.16	proteasome (prosome, macropain) subunit, beta type, 6 [Source:ZFIN;Acc:ZDB-GENE-990415-216]	ko03050//Proteasome	GO:0005634//nucleus;GO:0005839//proteasome core complex;GO:0000502//proteasome complex;GO:0005737//cytoplasm;GO:0005575//cellular_component;GO:0005622//intracellular;GO:0005623//cell;GO:0043234//protein complex;GO:0043226//organelle	GO:0008233//peptidase activity;GO:0004175//endopeptidase activity;GO:0016787//hydrolase activity;GO:0004298//threonine-type endopeptidase activity;GO:0003674//molecular_function	GO:0051603//proteolysis involved in cellular protein catabolic process;GO:0006508//proteolysis;GO:0008150//biological_process;GO:0009056//catabolic process
ENSDARG00000002249	6.57	16.31	14.545	-	ko01100//Metabolic pathways;ko00590//Arachidonic acid metabolism	-	GO:0016491//oxidoreductase activity;GO:0004497//monooxygenase activity;GO:0016705//oxidoreductase activity, acting on paired donors, with incorporation or reduction of molecular oxygen;GO:0020037//heme binding;GO:0046872//metal ion binding;GO:0005506//iron ion binding;GO:0003674//molecular_function;GO:0043167//ion binding;GO:0016491//oxidoreductase activity;GO:0004497//monooxygenase activity;GO:0…	GO:0055114//oxidation-reduction process;GO:0008150//biological_process;GO:0055114//oxidation-reduction process;GO:0008150//biological_process
ENSDARG00000002259	1.25	2.995	3.965	carbonic anhydrase XV c [Source:ZFIN;Acc:ZDB-GENE-061013-737]	-	GO:0005575//cellular_component;GO:0005575//cellular_component	GO:0004089//carbonate dehydratase activity;GO:0046872//metal ion binding;GO:0008270//zinc ion binding;GO:0003674//molecular_function;GO:0043167//ion binding;GO:0016829//lyase activity	GO:0006730//one-carbon metabolic process;GO:0008150//biological_process;GO:0044281//small molecule metabolic process
ENSDARG00000002285	5.69	2.975	2.595	-	-	-	-	-
ENSDARG00000002293	3.465	3.06	1.165	-	-	-	-	-
ENSDARG00000002396	8.32	2.555	10.955	-	-	-	-	-
ENSDARG00000002403	22.535	20.025	5.375	nucleolar and spindle associated protein 1 [Source:ZFIN;Acc:ZDB-GENE-030827-5]	-	GO:0005575//cellular_component;GO:0005622//intracellular;GO:0005623//cell;GO:0005634//nucleus;GO:0043226//organelle;GO:0005856//cytoskeleton;GO:0043234//protein complex;GO:0005737//cytoplasm;GO:0005730//nucleolus	GO:0003674//molecular_function;GO:0008092//cytoskeletal protein binding;GO:0003677//DNA binding	GO:0008150//biological_process;GO:0030154//cell differentiation;GO:0040011//locomotion;GO:0048856//anatomical structure development;GO:0048870//cell motility;GO:0007049//cell cycle;GO:0051301//cell division;GO:0007067//mitosis;GO:0007010//cytoskeleton organization
ENSDARG00000002406	1.135	0.965	0.175	zinc finger, MYND-type containing 10 [Source:ZFIN;Acc:ZDB-GENE-040426-1218]	-	GO:0005575//cellular_component;GO:0005622//intracellular;GO:0005623//cell;GO:0005737//cytoplasm;GO:0005815//microtubule organizing center;GO:0005856//cytoskeleton;GO:0043226//organelle	GO:0003674//molecular_function;GO:0043167//ion binding	GO:0006461//protein complex assembly;GO:0008150//biological_process;GO:0022607//cellular component assembly;GO:0065003;GO:0000902//cell morphogenesis;GO:0048646//anatomical structure formation involved in morphogenesis;GO:0048856//anatomical structure development
ENSDARG00000002411	1.33	1.865	3.015	-	-	-	-	-
ENSDARG00000002479	4.11	4.97	1.98	excision repair cross-complementation group 6-like [Source:ZFIN;Acc:ZDB-GENE-060531-56]	-	GO:0005575//cellular_component;GO:0005622//intracellular;GO:0005623//cell;GO:0005694//chromosome;GO:0043226//organelle;GO:0043234//protein complex	GO:0003674//molecular_function;GO:0004386//helicase activity;GO:0043167//ion binding;GO:0003677//DNA binding	GO:0007049//cell cycle;GO:0007067//mitosis;GO:0008150//biological_process;GO:0051301//cell division
ENSDARG00000002507	4.305	3.97	2.09	-	ko04810//Regulation of actin cytoskeleton;ko04510//Focal adhesion;ko05414//Dilated cardiomyopathy;ko05410//Hypertrophic cardiomyopathy (HCM);ko05412//Arrhythmogenic right ventricular cardiomyopathy (ARVC);ko04512//ECM-receptor interaction	GO:0005575//cellular_component;GO:0005623//cell;GO:0005886//plasma membrane;GO:0043234//protein complex	-	GO:0007155//cell adhesion;GO:0008150//biological_process;GO:0007165//signal transduction
ENSDARG00000002508	0.71	0.035	1.75	-	-	-	-	-
ENSDARG00000002523	93.94	96.39	46.59	hydroxysteroid dehydrogenase like 2 [Source:ZFIN;Acc:ZDB-GENE-030131-1066]	-	GO:0005575//cellular_component;GO:0005622//intracellular;GO:0005623//cell;GO:0005737//cytoplasm;GO:0005777//peroxisome;GO:0043226//organelle;GO:0005575//cellular_component;GO:0005622//intracellular;GO:0005623//cell;GO:0005737//cytoplasm;GO:0005777//peroxisome;GO:0043226//organelle	GO:0003674//molecular_function;GO:0016491//oxidoreductase activity;GO:0003674//molecular_function;GO:0016491//oxidoreductase activity	GO:0008150//biological_process;GO:0008150//biological_process
ENSDARG00000002576	3.09	1.725	6.075	calcium binding protein 5a [Source:ZFIN;Acc:ZDB-GENE-040426-1655]	-	-	GO:0005509//calcium ion binding;GO:0003674//molecular_function;GO:0043167//ion binding	-
ENSDARG00000002589	3218.7	2825.33	824.61	myosin light chain, phosphorylatable, fast skeletal muscle b [Source:ZFIN;Acc:ZDB-GENE-040912-115]	ko04810//Regulation of actin cytoskeleton;ko04510//Focal adhesion;ko04530//Tight junction;ko04670//Leukocyte transendothelial migration	GO:0005575//cellular_component;GO:0005575//cellular_component	GO:0005509//calcium ion binding;GO:0003674//molecular_function;GO:0043167//ion binding	-
ENSDARG00000002600	6.01	9.44	14.035	proprotein convertase subtilisin/kexin type 1 [Source:ZFIN;Acc:ZDB-GENE-071009-1]	-	-	GO:0016787//hydrolase activity;GO:0008236//serine-type peptidase activity;GO:0004252//serine-type endopeptidase activity;GO:0008233//peptidase activity;GO:0003674//molecular_function	GO:0006508//proteolysis;GO:0008150//biological_process
ENSDARG00000002601	4.73	2.535	2.295	iroquois homeobox 7 [Source:ZFIN;Acc:ZDB-GENE-020103-1]	-	GO:0005634//nucleus;GO:0005575//cellular_component;GO:0005622//intracellular;GO:0005623//cell;GO:0043226//organelle	GO:0043565//sequence-specific DNA binding;GO:0003677//DNA binding;GO:0003674//molecular_function	GO:0030182//neuron differentiation;GO:0060041//retina development in camera-type eye;GO:0010842//retina layer formation;GO:0006355//regulation of transcription, DNA-templated;GO:0021575//hindbrain morphogenesis;GO:0030902//hindbrain development;GO:0060059//embryonic retina morphogenesis in camera-type eye;GO:0008150//biological_process;GO:0009790//embryo development;GO:0048856//anatomical structu…
ENSDARG00000002609	3.515	2.61	5.405	-	-	-	-	-
ENSDARG00000002613	34.43	21.1	15.045	replication protein A3 [Source:ZFIN;Acc:ZDB-GENE-040426-977]	ko03420//Nucleotide excision repair;ko03030//DNA replication;ko03440//Homologous recombination;ko03430//Mismatch repair	GO:0005634//nucleus;GO:0005575//cellular_component;GO:0005622//intracellular;GO:0005623//cell;GO:0043226//organelle	GO:0003677//DNA binding;GO:0003674//molecular_function	GO:0006260//DNA replication;GO:0006281//DNA repair;GO:0006310//DNA recombination;GO:0006259//DNA metabolic process;GO:0008150//biological_process;GO:0034641//cellular nitrogen compound metabolic process;GO:0006950//response to stress;GO:0009058//biosynthetic process
ENSDARG00000002690	17.96	10.965	7.245	RAB interacting factor [Source:ZFIN;Acc:ZDB-GENE-040718-216]	-	-	GO:0005085//guanyl-nucleotide exchange factor activity;GO:0003674//molecular_function;GO:0005085//guanyl-nucleotide exchange factor activity;GO:0003674//molecular_function;GO:0005085//guanyl-nucleotide exchange factor activity;GO:0003674//molecular_function	GO:0007264//small GTPase mediated signal transduction;GO:0007165//signal transduction;GO:0008150//biological_process;GO:0007264//small GTPase mediated signal transduction;GO:0007165//signal transduction;GO:0008150//biological_process;GO:0007264//small GTPase mediated signal transduction;GO:0007165//signal transduction;GO:0008150//biological_process
ENSDARG00000002696	631.715	730.47	272.82	-	-	-	-	-
ENSDARG00000002732	34.565	37.335	12.865	spondin 2b, extracellular matrix protein [Source:ZFIN;Acc:ZDB-GENE-990415-161]	-	GO:0005578//proteinaceous extracellular matrix;GO:0005575//cellular_component;GO:0005576//extracellular region;GO:0005578//proteinaceous extracellular matrix;GO:0005578//proteinaceous extracellular matrix;GO:0005575//cellular_component;GO:0005576//extracellular region;GO:0005578//proteinaceous extracellular matrix	GO:0003674//molecular_function;GO:0003674//molecular_function;GO:0003674//molecular_function;GO:0003674//molecular_function	-
ENSDARG00000002758	9.445	7.225	18.09	-	-	-	-	GO:0042981//regulation of apoptotic process;GO:0008150//biological_process
ENSDARG00000002764	18.475	29.65	13.75	-	-	-	-	-
ENSDARG00000002771	3.14	1.115	1.82	-	-	-	-	-
ENSDARG00000002794	0.905	1.53	4.505	-	-	-	-	-
ENSDARG00000002795	12.155	10.89	5.855	myeloid ecotropic viral integration site 3 [Source:ZFIN;Acc:ZDB-GENE-010406-2]	-	GO:0005737//cytoplasm;GO:0005634//nucleus;GO:0005575//cellular_component;GO:0005622//intracellular;GO:0005623//cell;GO:0005634//nucleus;GO:0043226//organelle;GO:0005737//cytoplasm	GO:0003677//DNA binding;GO:0043565//sequence-specific DNA binding;GO:0005515//protein binding;GO:0003674//molecular_function	GO:0030902//hindbrain development;GO:0035066//positive regulation of histone acetylation;GO:0006355//regulation of transcription, DNA-templated;GO:0045944//positive regulation of transcription from RNA polymerase II promoter;GO:0031017//exocrine pancreas development;GO:0031016//pancreas development;GO:0008150//biological_process;GO:0048856//anatomical structure development
ENSDARG00000002816	0.59	0.815	1.88	-	ko04010//MAPK signaling pathway	GO:0005575//cellular_component;GO:0005622//intracellular;GO:0005623//cell;GO:0005737//cytoplasm;GO:0005783//endoplasmic reticulum;GO:0043226//organelle;GO:0005886//plasma membrane	GO:0003674//molecular_function	GO:0007165//signal transduction;GO:0008150//biological_process
ENSDARG00000002933	8.25	4.74	3.02	gastrulation brain homeobox 2 [Source:ZFIN;Acc:ZDB-GENE-020509-2]	-	GO:0005634//nucleus;GO:0005575//cellular_component;GO:0005622//intracellular;GO:0005623//cell;GO:0043226//organelle	GO:0003677//DNA binding;GO:0043565//sequence-specific DNA binding;GO:0003674//molecular_function	GO:0030902//hindbrain development;GO:0021549//cerebellum development;GO:0006355//regulation of transcription, DNA-templated;GO:0008150//biological_process;GO:0048856//anatomical structure development
ENSDARG00000002937	22.925	18.29	10.89	Meis homeobox 1 a [Source:ZFIN;Acc:ZDB-GENE-020122-3]	-	GO:0005634//nucleus;GO:0005575//cellular_component;GO:0005622//intracellular;GO:0005623//cell;GO:0043226//organelle	GO:0003677//DNA binding;GO:0003674//molecular_function	GO:0006355//regulation of transcription, DNA-templated;GO:0007420//brain development;GO:0008150//biological_process;GO:0048856//anatomical structure development
ENSDARG00000002956	0.415	0.65	1.03	-	ko04810//Regulation of actin cytoskeleton;ko05152//Tuberculosis	-	-	-
ENSDARG00000002986	4.26	11.925	26.51	-	ko01100//Metabolic pathways;ko00230//Purine metabolism	GO:0005575//cellular_component;GO:0005575//cellular_component	GO:0016810//hydrolase activity, acting on carbon-nitrogen (but not peptide) bonds;GO:0008892//guanine deaminase activity;GO:0016787//hydrolase activity;GO:0008270//zinc ion binding;GO:0003674//molecular_function;GO:0043167//ion binding	GO:0006147//guanine catabolic process;GO:0008150//biological_process;GO:0009056//catabolic process;GO:0034641//cellular nitrogen compound metabolic process;GO:0044281//small molecule metabolic process
ENSDARG00000003017	22.765	18.055	9.92	zgc:55512 [Source:ZFIN;Acc:ZDB-GENE-030131-4195]	ko04120//Ubiquitin mediated proteolysis	GO:0033503//HULC complex;GO:0000790//nuclear chromatin;GO:0005737//cytoplasm;GO:0005575//cellular_component;GO:0005622//intracellular;GO:0005623//cell;GO:0005737//cytoplasm;GO:0000228//nuclear chromosome;GO:0005634//nucleus;GO:0005694//chromosome;GO:0043226//organelle;GO:0043234//protein complex	GO:0019787//small conjugating protein ligase activity;GO:0016874//ligase activity;GO:0031625//ubiquitin protein ligase binding;GO:0003674//molecular_function;GO:0019899//enzyme binding	GO:0043161//proteasome-mediated ubiquitin-dependent protein catabolic process;GO:0016574//histone ubiquitination;GO:0006281//DNA repair;GO:0000209//protein polyubiquitination;GO:0006464//cellular protein modification process;GO:0008150//biological_process;GO:0006259//DNA metabolic process;GO:0006950//response to stress;GO:0034641//cellular nitrogen compound metabolic process;GO:0051276//chromosom…
ENSDARG00000003046	1.55	0.96	2.12	-	-	-	-	-
ENSDARG00000003061	19.57	12.35	4.36	-	ko04514//Cell adhesion molecules (CAMs)	GO:0016020//membrane;GO:0016021//integral component of membrane;GO:0005575//cellular_component;GO:0016020//membrane;GO:0016021//integral component of membrane;GO:0005575//cellular_component	GO:0003674//molecular_function;GO:0003674//molecular_function;GO:0003674//molecular_function;GO:0003674//molecular_function	-
ENSDARG00000003113	41.23	179.04	186.3	-	-	-	-	-
ENSDARG00000003146	2.595	1.555	3.915	-	-	-	-	-
ENSDARG00000003181	13.74	7.92	5.06	sulfotransferase family 1, cytosolic sulfotransferase 4 [Source:ZFIN;Acc:ZDB-GENE-040426-2054]	-	GO:0005575//cellular_component;GO:0005575//cellular_component	GO:0018721;GO:0018724;GO:0018727;GO:0050694//galactose 3-O-sulfotransferase activity;GO:0080131//hydroxyjasmonate sulfotransferase activity;GO:0001537//N-acetylgalactosamine 4-O-sulfotransferase activity;GO:0016232//HNK-1 sulfotransferase activity;GO:0018722;GO:0018725;GO:0019111;GO:0050698//proteoglycan sulfotransferase activity;GO:0004394//heparan sulfate 2-O-sulfotransferase activity;GO:001674…	-
ENSDARG00000003200	5.46	6.885	1.505	-	-	GO:0005634//nucleus;GO:0005575//cellular_component;GO:0005622//intracellular;GO:0005623//cell;GO:0043226//organelle	GO:0003677//DNA binding;GO:0003700//sequence-specific DNA binding transcription factor activity;GO:0043565//sequence-specific DNA binding;GO:0000981//sequence-specific DNA binding RNA polymerase II transcription factor activity;GO:0001071//nucleic acid binding transcription factor activity;GO:0003674//molecular_function	GO:0006355//regulation of transcription, DNA-templated;GO:0030154//cell differentiation;GO:0006357//regulation of transcription from RNA polymerase II promoter;GO:0006351//transcription, DNA-templated;GO:0009653//anatomical structure morphogenesis;GO:0008150//biological_process;GO:0048856//anatomical structure development;GO:0009058//biosynthetic process;GO:0034641//cellular nitrogen compound met…
ENSDARG00000003203	5.135	8.3	20.87	Rh family, C glycoprotein a [Source:ZFIN;Acc:ZDB-GENE-070424-81]	-	GO:0016021//integral component of membrane;GO:0016020//membrane;GO:0005575//cellular_component	GO:0008519//ammonium transmembrane transporter activity;GO:0003674//molecular_function;GO:0022857//transmembrane transporter activity	GO:0015696//ammonium transport;GO:0006810//transport;GO:0008150//biological_process
ENSDARG00000003250	0.485	0.875	1.38	phosphatidylinositol-4,5-bisphosphate 3-kinase, catalytic subunit delta [Source:ZFIN;Acc:ZDB-GENE-040426-1128]	ko05200//Pathways in cancer;ko04810//Regulation of actin cytoskeleton;ko04510//Focal adhesion;ko04062//Chemokine signaling pathway;ko04910//Insulin signaling pathway;ko04670//Leukocyte transendothelial migration;ko05164//Influenza A;ko04722//Neurotrophin signaling pathway;ko05160//Hepatitis C;ko05145//Toxoplasmosis;ko05215//Prostate cancer;ko04725//Cholinergic synapse;ko05142//Chagas disease (Ame…	GO:0005942//phosphatidylinositol 3-kinase complex;GO:0005886//plasma membrane;GO:0005575//cellular_component;GO:0005623//cell;GO:0005886//plasma membrane;GO:0043234//protein complex	GO:0035005//1-phosphatidylinositol-4-phosphate 3-kinase activity;GO:0046934//phosphatidylinositol-4,5-bisphosphate 3-kinase activity;GO:0016740//transferase activity;GO:0016773//phosphotransferase activity, alcohol group as acceptor;GO:0016301//kinase activity;GO:0000166//nucleotide binding;GO:0016303//1-phosphatidylinositol-3-kinase activity;GO:0005524//ATP binding;GO:0016772//transferase activi…	GO:0048696//regulation of collateral sprouting in absence of injury;GO:0048015//phosphatidylinositol-mediated signaling;GO:0016310//phosphorylation;GO:0046854//phosphatidylinositol phosphorylation;GO:0006629//lipid metabolic process;GO:0008150//biological_process;GO:0007165//signal transduction;GO:0030154//cell differentiation;GO:0048856//anatomical structure development
ENSDARG00000003259	8.16	8.425	3.475	lysyl oxidase [Source:ZFIN;Acc:ZDB-GENE-040426-2398]	-	GO:0005575//cellular_component;GO:0005575//cellular_component	GO:0016641//oxidoreductase activity, acting on the CH-NH2 group of donors, oxygen as acceptor;GO:0005507//copper ion binding;GO:0003674//molecular_function;GO:0043167//ion binding;GO:0016491//oxidoreductase activity	GO:0051216//cartilage development;GO:0022008//neurogenesis;GO:0007517//muscle organ development;GO:0055114//oxidation-reduction process;GO:0008150//biological_process;GO:0048856//anatomical structure development;GO:0030154//cell differentiation
ENSDARG00000003326	2.945	7.47	1.715	calcium channel, voltage-dependent, gamma subunit 5a [Source:ZFIN;Acc:ZDB-GENE-120104-4]	ko04010//MAPK signaling pathway;ko05414//Dilated cardiomyopathy;ko04260//Cardiac muscle contraction;ko05410//Hypertrophic cardiomyopathy (HCM);ko05412//Arrhythmogenic right ventricular cardiomyopathy (ARVC)	GO:0005575//cellular_component;GO:0005575//cellular_component	GO:0003674//molecular_function;GO:0022857//transmembrane transporter activity;GO:0003674//molecular_function;GO:0022857//transmembrane transporter activity	GO:0006810//transport;GO:0008150//biological_process;GO:0055085//transmembrane transport;GO:0006810//transport;GO:0008150//biological_process;GO:0055085//transmembrane transport
ENSDARG00000003380	7.325	16.155	17.04	polyamine oxidase (exo-N4-amino) [Source:HGNC Symbol;Acc:HGNC:20837]	ko04146//Peroxisome	-	GO:0003674//molecular_function;GO:0016491//oxidoreductase activity	-
ENSDARG00000003421	3.985	4.39	8.17	-	-	-	GO:0003674//molecular_function;GO:0003723//RNA binding;GO:0003729//mRNA binding	-
ENSDARG00000003449	0.92	1.225	1.91	phosphodiesterase 10A [Source:ZFIN;Acc:ZDB-GENE-040426-1115]	-	-	GO:0046872//metal ion binding;GO:0008081//phosphoric diester hydrolase activity;GO:0016787//hydrolase activity;GO:0004114//3',5'-cyclic-nucleotide phosphodiesterase activity;GO:0003674//molecular_function;GO:0043167//ion binding	GO:0007165//signal transduction;GO:0008150//biological_process
ENSDARG00000003462	1.4	2.435	2.99	ferrochelatase [Source:ZFIN;Acc:ZDB-GENE-000928-1]	ko01100//Metabolic pathways;ko00860//Porphyrin and chlorophyll metabolism	GO:0005739//mitochondrion;GO:0005575//cellular_component;GO:0005622//intracellular;GO:0005623//cell;GO:0005737//cytoplasm;GO:0005739//mitochondrion;GO:0043226//organelle	GO:0004325//ferrochelatase activity;GO:0016829//lyase activity;GO:0003674//molecular_function	GO:0043249//erythrocyte maturation;GO:0006779//porphyrin-containing compound biosynthetic process;GO:0006783//heme biosynthetic process;GO:0008150//biological_process;GO:0009058//biosynthetic process;GO:0034641//cellular nitrogen compound metabolic process;GO:0051186//cofactor metabolic process;GO:0002376//immune system process;GO:0021700//developmental maturation;GO:0030154//cell differentiation…
ENSDARG00000003469	28.17	21.1	9.265	neuronal differentiation 4 [Source:ZFIN;Acc:ZDB-GENE-030730-1]	-	GO:0005634//nucleus;GO:0005575//cellular_component;GO:0005622//intracellular;GO:0005623//cell;GO:0043226//organelle	GO:0003677//DNA binding;GO:0046983//protein dimerization activity;GO:0003674//molecular_function	GO:0007399//nervous system development;GO:0071698//olfactory placode development;GO:0030154//cell differentiation;GO:0006351//transcription, DNA-templated;GO:0001839//neural plate morphogenesis;GO:0006355//regulation of transcription, DNA-templated;GO:0050769//positive regulation of neurogenesis;GO:0007275//multicellular organismal development;GO:0008150//biological_process;GO:0048856//anatomical…
ENSDARG00000003475	2.485	5.26	7.15	-	-	-	GO:0018721;GO:0018724;GO:0018727;GO:0050694//galactose 3-O-sulfotransferase activity;GO:0080131//hydroxyjasmonate sulfotransferase activity;GO:0001537//N-acetylgalactosamine 4-O-sulfotransferase activity;GO:0008146//sulfotransferase activity;GO:0016232//HNK-1 sulfotransferase activity;GO:0018722;GO:0018725;GO:0019111;GO:0050698//proteoglycan sulfotransferase activity;GO:0004394//heparan sulfate 2…	GO:0006805//xenobiotic metabolic process;GO:0008150//biological_process
ENSDARG00000003517	34.075	22.815	12.135	inositol(myo)-1(or 4)-monophosphatase 1 [Source:ZFIN;Acc:ZDB-GENE-040718-245]	ko01100//Metabolic pathways;ko04070//Phosphatidylinositol signaling system;ko00562//Inositol phosphate metabolism	-	-	GO:0046854//phosphatidylinositol phosphorylation;GO:0006629//lipid metabolic process;GO:0008150//biological_process
ENSDARG00000003523	6.17	3.12	1.18	-	-	-	-	-
ENSDARG00000003527	23.715	17.95	39.375	-	-	-	-	-
ENSDARG00000003533	1.605	2.14	0.745	-	-	-	-	-
ENSDARG00000003544	2.46	2.7	5.055	adenosine deaminase, RNA-specific, B1b [Source:ZFIN;Acc:ZDB-GENE-030219-15]	-	-	GO:0003674//molecular_function;GO:0016810//hydrolase activity, acting on carbon-nitrogen (but not peptide) bonds;GO:0003723//RNA binding	-
ENSDARG00000003570	190.725	87.175	238.035	heat shock protein 90, beta (grp94), member 1 [Source:ZFIN;Acc:ZDB-GENE-031002-1]	ko05200//Pathways in cancer;ko04141//Protein processing in endoplasmic reticulum;ko05215//Prostate cancer;ko04621//NOD-like receptor signaling pathway	-	GO:0005524//ATP binding;GO:0051082//unfolded protein binding;GO:0003674//molecular_function;GO:0043167//ion binding	GO:0006457//protein folding;GO:0006950//response to stress;GO:0035889//otolith tethering;GO:0008150//biological_process;GO:0048856//anatomical structure development
ENSDARG00000003607	20.895	15.445	10.275	-	-	GO:0005634//nucleus;GO:0005575//cellular_component;GO:0005622//intracellular;GO:0005623//cell;GO:0043226//organelle	GO:0043565//sequence-specific DNA binding;GO:0003700//sequence-specific DNA binding transcription factor activity;GO:0003707//steroid hormone receptor activity;GO:0004879//ligand-activated sequence-specific DNA binding RNA polymerase II transcription factor activity;GO:0046872//metal ion binding;GO:0003677//DNA binding;GO:0008270//zinc ion binding;GO:0003674//molecular_function;GO:0043167//ion bi…	GO:0006355//regulation of transcription, DNA-templated;GO:0006351//transcription, DNA-templated;GO:0043401//steroid hormone mediated signaling pathway;GO:0007165//signal transduction;GO:0008150//biological_process;GO:0009058//biosynthetic process;GO:0034641//cellular nitrogen compound metabolic process
ENSDARG00000003615	7.01	23.43	20.29	solute carrier family 26 (anion exchanger), member 3, tandem duplicate 2 [Source:ZFIN;Acc:ZDB-GENE-041210-179]	-	GO:0016020//membrane;GO:0016021//integral component of membrane;GO:0005887//integral component of plasma membrane;GO:0005575//cellular_component;GO:0005623//cell;GO:0005886//plasma membrane	GO:0008271//secondary active sulfate transmembrane transporter activity;GO:0015116//sulfate transmembrane transporter activity;GO:0015301//anion:anion antiporter activity;GO:0003674//molecular_function;GO:0022857//transmembrane transporter activity	GO:0006821//chloride transport;GO:0008272//sulfate transport;GO:0015701//bicarbonate transport;GO:0055085//transmembrane transport;GO:0006810//transport;GO:0008150//biological_process
ENSDARG00000003642	14.865	11.975	5.645	-	-	GO:0005575//cellular_component;GO:0005575//cellular_component	GO:0046872//metal ion binding;GO:0003674//molecular_function;GO:0043167//ion binding	-
ENSDARG00000003732	2.065	0.42	0.31	microphthalmia-associated transcription factor a [Source:ZFIN;Acc:ZDB-GENE-990910-11]	ko05200//Pathways in cancer;ko04916//Melanogenesis;ko04380//Osteoclast differentiation;ko05218//Melanoma	GO:0005634//nucleus;GO:0005654//nucleoplasm;GO:0005575//cellular_component;GO:0005622//intracellular;GO:0005623//cell;GO:0005654//nucleoplasm;GO:0043226//organelle	GO:0003700//sequence-specific DNA binding transcription factor activity;GO:0000981//sequence-specific DNA binding RNA polymerase II transcription factor activity;GO:0046983//protein dimerization activity;GO:0003674//molecular_function;GO:0001071//nucleic acid binding transcription factor activity	GO:0006351//transcription, DNA-templated;GO:0030318//melanocyte differentiation;GO:0006357//regulation of transcription from RNA polymerase II promoter;GO:0043473//pigmentation;GO:0045670//regulation of osteoclast differentiation;GO:0042981//regulation of apoptotic process;GO:0006355//regulation of transcription, DNA-templated;GO:0008150//biological_process;GO:0002376//immune system process;GO:00…
ENSDARG00000003749	20.115	10.705	8.98	polymerase (DNA directed), beta [Source:ZFIN;Acc:ZDB-GENE-040830-1]	ko03410//Base excision repair	GO:0005634//nucleus;GO:0005575//cellular_component;GO:0005622//intracellular;GO:0005623//cell;GO:0043226//organelle	GO:0003677//DNA binding;GO:0003674//molecular_function;GO:0003887//DNA-directed DNA polymerase activity;GO:0016779//nucleotidyltransferase activity;GO:0034061	GO:0006281//DNA repair;GO:0006259//DNA metabolic process;GO:0006950//response to stress;GO:0008150//biological_process;GO:0034641//cellular nitrogen compound metabolic process
ENSDARG00000003750	14.6	6.995	9.185	phosphoribosylformylglycinamidine synthase [Source:ZFIN;Acc:ZDB-GENE-030131-4420]	ko01100//Metabolic pathways;ko00230//Purine metabolism	GO:0005737//cytoplasm;GO:0005575//cellular_component;GO:0005622//intracellular;GO:0005623//cell;GO:0005737//cytoplasm	GO:0004642//phosphoribosylformylglycinamidine synthase activity;GO:0003824//catalytic activity;GO:0005524//ATP binding;GO:0003674//molecular_function;GO:0043167//ion binding;GO:0016874//ligase activity	GO:0006189//'de novo' IMP biosynthetic process;GO:0006164//purine nucleotide biosynthetic process;GO:0009156//ribonucleoside monophosphate biosynthetic process;GO:0006541//glutamine metabolic process;GO:0006520//cellular amino acid metabolic process;GO:0008150//biological_process;GO:0044281//small molecule metabolic process;GO:0009058//biosynthetic process;GO:0034641//cellular nitrogen compound m…
ENSDARG00000003797	1.895	3.795	1.01	-	-	-	-	-
ENSDARG00000003820	9.685	5.77	11.75	nuclear receptor subfamily 1, group D, member 2a [Source:ZFIN;Acc:ZDB-GENE-040504-1]	-	GO:0005634//nucleus;GO:0005575//cellular_component;GO:0005622//intracellular;GO:0005623//cell;GO:0043226//organelle	GO:0046872//metal ion binding;GO:0003677//DNA binding;GO:0003700//sequence-specific DNA binding transcription factor activity;GO:0003707//steroid hormone receptor activity;GO:0008270//zinc ion binding;GO:0043565//sequence-specific DNA binding;GO:0004887//thyroid hormone receptor activity;GO:0001071//nucleic acid binding transcription factor activity;GO:0003674//molecular_function;GO:0004871//sign…	GO:0032922//circadian regulation of gene expression;GO:0006355//regulation of transcription, DNA-templated;GO:0006351//transcription, DNA-templated;GO:0043401//steroid hormone mediated signaling pathway;GO:0007165//signal transduction;GO:0008150//biological_process;GO:0009058//biosynthetic process;GO:0034641//cellular nitrogen compound metabolic process
ENSDARG00000003860	101.805	67.155	50.36	chromobox homolog 3a (HP1 gamma homolog, Drosophila) [Source:ZFIN;Acc:ZDB-GENE-030131-1158]	-	GO:0005634//nucleus;GO:0005575//cellular_component;GO:0005622//intracellular;GO:0005623//cell;GO:0043226//organelle	-	-
ENSDARG00000003869	34.71	35.305	16.23	-	-	-	-	-
ENSDARG00000003902	14.69	259.615	734.8	cathepsin L.1 [Source:ZFIN;Acc:ZDB-GENE-040718-61]	-	GO:0005575//cellular_component;GO:0005575//cellular_component	GO:0016787//hydrolase activity;GO:0008234//cysteine-type peptidase activity;GO:0008233//peptidase activity;GO:0003674//molecular_function	GO:0006508//proteolysis;GO:0008150//biological_process
ENSDARG00000003903	0.435	1.245	1.545	hyaluronan and proteoglycan link protein 2 [Source:ZFIN;Acc:ZDB-GENE-030131-8089]	-	GO:0005578//proteinaceous extracellular matrix;GO:0005575//cellular_component;GO:0005576//extracellular region;GO:0005578//proteinaceous extracellular matrix	GO:0042802//identical protein binding;GO:0005515//protein binding;GO:0005540//hyaluronic acid binding;GO:0005201//extracellular matrix structural constituent;GO:0003674//molecular_function;GO:0005198//structural molecule activity	GO:0007155//cell adhesion;GO:0007417//central nervous system development;GO:0001501//skeletal system development;GO:0008150//biological_process;GO:0048856//anatomical structure development;GO:0007155//cell adhesion
ENSDARG00000003909	0.96	4.145	6.495	finTRIM family, member 1 [Source:ZFIN;Acc:ZDB-GENE-070705-491]	-	-	GO:0003674//molecular_function;GO:0043167//ion binding	-
ENSDARG00000003931	29.72	66.235	56.775	CNDP dipeptidase 2 (metallopeptidase M20 family) [Source:ZFIN;Acc:ZDB-GENE-030131-5499]	ko01100//Metabolic pathways;ko00330//Arginine and proline metabolism;ko00410//beta-Alanine metabolism;ko00340//Histidine metabolism	GO:0005575//cellular_component;GO:0005575//cellular_component;GO:0005575//cellular_component;GO:0005575//cellular_component	GO:0016805//dipeptidase activity;GO:0034701//tripeptidase activity;GO:0008237//metallopeptidase activity;GO:0016787//hydrolase activity;GO:0003674//molecular_function;GO:0008233//peptidase activity;GO:0016805//dipeptidase activity;GO:0034701//tripeptidase activity;GO:0008237//metallopeptidase activity;GO:0016787//hydrolase activity;GO:0003674//molecular_function;GO:0008233//peptidase activity	GO:0008152//metabolic process;GO:0006508//proteolysis;GO:0008150//biological_process;GO:0008152//metabolic process;GO:0006508//proteolysis;GO:0008150//biological_process
ENSDARG00000003934	11.24	8.5	5.09	nucleoredoxin-like 2 [Source:ZFIN;Acc:ZDB-GENE-041212-55]	-	GO:0005575//cellular_component;GO:0005575//cellular_component	-	GO:0045494//photoreceptor cell maintenance;GO:0007600//sensory perception;GO:0008150//biological_process;GO:0050877//neurological system process;GO:0042592//homeostatic process
ENSDARG00000003941	11.685	4.73	5.71	RRS1 ribosome biogenesis regulator homolog (S. cerevisiae) [Source:ZFIN;Acc:ZDB-GENE-030131-9345]	-	GO:0005634//nucleus;GO:0005575//cellular_component;GO:0005622//intracellular;GO:0005623//cell;GO:0043226//organelle	GO:0003674//molecular_function;GO:0003674//molecular_function	GO:0042254//ribosome biogenesis;GO:0008150//biological_process
ENSDARG00000003971	12.235	8.74	5.84	ISL LIM homeobox 2a [Source:ZFIN;Acc:ZDB-GENE-980526-562]	-	GO:0005575//cellular_component;GO:0005622//intracellular;GO:0005623//cell;GO:0005634//nucleus;GO:0043226//organelle	GO:0003674//molecular_function;GO:0003677//DNA binding;GO:0043167//ion binding	GO:0008150//biological_process;GO:0048856//anatomical structure development;GO:0000902//cell morphogenesis;GO:0030154//cell differentiation;GO:0040007//growth;GO:0040011//locomotion
ENSDARG00000003973	5.585	4.425	10.375	cysteine and histidine-rich domain (CHORD) containing 1a [Source:ZFIN;Acc:ZDB-GENE-050626-79]	-	GO:0005575//cellular_component;GO:0005575//cellular_component	-	GO:0008150//biological_process;GO:0008150//biological_process
ENSDARG00000003977	2.65	4.91	6.83	zgc:153896 [Source:ZFIN;Acc:ZDB-GENE-060825-119]	ko01100//Metabolic pathways;ko00600//Sphingolipid metabolism	GO:0005575//cellular_component;GO:0005575//cellular_component	GO:0003824//catalytic activity;GO:0003674//molecular_function	GO:0008152//metabolic process;GO:0008150//biological_process
ENSDARG00000003989	0.38	0.65	0.975	corticotropin releasing hormone receptor 1 [Source:ZFIN;Acc:ZDB-GENE-081231-1]	ko04080//Neuroactive ligand-receptor interaction;ko04730//Long-term depression	GO:0005575//cellular_component	GO:0003674//molecular_function;GO:0004871//signal transducer activity	GO:0007165//signal transduction;GO:0008150//biological_process
ENSDARG00000004023	30.35	18.715	14.63	ISL LIM homeobox 1 [Source:ZFIN;Acc:ZDB-GENE-980526-112]	-	GO:0005575//cellular_component;GO:0005622//intracellular;GO:0005623//cell;GO:0005634//nucleus;GO:0043226//organelle	GO:0003674//molecular_function;GO:0003677//DNA binding;GO:0043167//ion binding	GO:0008150//biological_process;GO:0030154//cell differentiation;GO:0048856//anatomical structure development;GO:0000902//cell morphogenesis;GO:0040007//growth
ENSDARG00000004049	8.46	6.195	4.125	myristoylated alanine-rich protein kinase C substrate a [Source:ZFIN;Acc:ZDB-GENE-050522-145]	-	GO:0005575//cellular_component;GO:0005575//cellular_component	GO:0016301//kinase activity;GO:0005516//calmodulin binding;GO:0016740//transferase activity;GO:0003674//molecular_function	GO:0007420//brain development;GO:0035914//skeletal muscle cell differentiation;GO:0060541//respiratory system development;GO:0016310//phosphorylation;GO:0010842//retina layer formation;GO:0008150//biological_process;GO:0048646//anatomical structure formation involved in morphogenesis;GO:0048856//anatomical structure development;GO:0030154//cell differentiation
ENSDARG00000004060	27.695	24.74	88.79	basic helix-loop-helix family, member e40 [Source:ZFIN;Acc:ZDB-GENE-030131-3133]	-	GO:0005634//nucleus;GO:0005575//cellular_component;GO:0005622//intracellular;GO:0005623//cell;GO:0043226//organelle	GO:0046983//protein dimerization activity;GO:0003677//DNA binding;GO:0003674//molecular_function	GO:0032922//circadian regulation of gene expression;GO:0006355//regulation of transcription, DNA-templated;GO:0045892//negative regulation of transcription, DNA-templated;GO:0045475//locomotor rhythm;GO:0006351//transcription, DNA-templated;GO:0008150//biological_process;GO:0009058//biosynthetic process;GO:0034641//cellular nitrogen compound metabolic process
ENSDARG00000004130	4.14	2.22	1.98	mevalonate kinase [Source:ZFIN;Acc:ZDB-GENE-041114-37]	ko01100//Metabolic pathways;ko04146//Peroxisome;ko00900//Terpenoid backbone biosynthesis	GO:0005737//cytoplasm;GO:0005575//cellular_component;GO:0005622//intracellular;GO:0005623//cell	GO:0016301//kinase activity;GO:0000166//nucleotide binding;GO:0016773//phosphotransferase activity, alcohol group as acceptor;GO:0005524//ATP binding;GO:0004496//mevalonate kinase activity;GO:0016740//transferase activity;GO:0003674//molecular_function;GO:0043167//ion binding	GO:0008299//isoprenoid biosynthetic process;GO:0016310//phosphorylation;GO:0008152//metabolic process;GO:0008150//biological_process;GO:0006629//lipid metabolic process;GO:0009058//biosynthetic process
ENSDARG00000004131	2.065	2.34	0.69	-	-	-	-	-
ENSDARG00000004169	73.125	46.095	29.645	stathmin 1a [Source:ZFIN;Acc:ZDB-GENE-031006-14]	-	GO:0043005//neuron projection;GO:0005737//cytoplasm;GO:0005575//cellular_component;GO:0005622//intracellular;GO:0005623//cell;GO:0005737//cytoplasm	GO:0015631//tubulin binding;GO:0003674//molecular_function;GO:0008092//cytoskeletal protein binding	GO:0007019//microtubule depolymerization;GO:0031175//neuron projection development;GO:0051493//regulation of cytoskeleton organization;GO:0031110//regulation of microtubule polymerization or depolymerization;GO:0008150//biological_process;GO:0030154//cell differentiation;GO:0048856//anatomical structure development;GO:0007010//cytoskeleton organization
ENSDARG00000004176	1.915	1.075	0.48	-	-	-	-	-
ENSDARG00000004199	5.095	2.075	0.23	sperm adhesion molecule 1 [Source:ZFIN;Acc:ZDB-GENE-050506-63]	-	GO:0005575//cellular_component;GO:0005575//cellular_component	GO:0016798//hydrolase activity, acting on glycosyl bonds;GO:0003824//catalytic activity;GO:0004415//hyalurononglucosaminidase activity;GO:0016787//hydrolase activity;GO:0003674//molecular_function	GO:0008152//metabolic process;GO:0005975//carbohydrate metabolic process;GO:0008150//biological_process
ENSDARG00000004232	10.79	6.335	2.93	deltaB [Source:ZFIN;Acc:ZDB-GENE-980526-114]	ko04330//Notch signaling pathway	GO:0005575//cellular_component	GO:0003674//molecular_function;GO:0043167//ion binding	GO:0007165//signal transduction;GO:0008150//biological_process;GO:0048856//anatomical structure development;GO:0030154//cell differentiation
ENSDARG00000004243	0.32	0.56	1.16	acid-sensing (proton-gated) ion channel family member 4b [Source:ZFIN;Acc:ZDB-GENE-040513-6]	-	GO:0005575//cellular_component;GO:0005623//cell;GO:0005886//plasma membrane;GO:0005575//cellular_component;GO:0005623//cell;GO:0005886//plasma membrane;GO:0005575//cellular_component;GO:0005623//cell;GO:0005886//plasma membrane	GO:0003674//molecular_function;GO:0022857//transmembrane transporter activity;GO:0003674//molecular_function;GO:0022857//transmembrane transporter activity;GO:0003674//molecular_function;GO:0022857//transmembrane transporter activity	GO:0006810//transport;GO:0008150//biological_process;GO:0055085//transmembrane transport;GO:0006810//transport;GO:0008150//biological_process;GO:0055085//transmembrane transport;GO:0006810//transport;GO:0008150//biological_process;GO:0055085//transmembrane transport
ENSDARG00000004256	0.87	0.645	0.29	-	-	-	-	-
ENSDARG00000004296	301.155	217.05	122.135	alpha-1-microglobulin/bikunin precursor [Source:ZFIN;Acc:ZDB-GENE-040426-1608]	-	GO:0005576//extracellular region;GO:0005575//cellular_component	GO:0004867//serine-type endopeptidase inhibitor activity;GO:0036094//small molecule binding;GO:0003674//molecular_function;GO:0030234//enzyme regulator activity	-
ENSDARG00000004311	11.965	9.85	2.335	-	ko04144//Endocytosis	GO:0005575//cellular_component;GO:0005575//cellular_component	-	-
ENSDARG00000004322	1.63	2.375	0.82	-	-	-	-	-
ENSDARG00000004358	42.11	22.78	14.605	-	-	-	-	-
ENSDARG00000004427	111.99	75.87	44.68	-	-	-	-	-
ENSDARG00000004447	1.9	1.055	0.74	-	-	-	-	-
ENSDARG00000004472	8.975	6.355	3.705	-	-	GO:0005575//cellular_component;GO:0005622//intracellular;GO:0005623//cell;GO:0005856//cytoskeleton;GO:0043226//organelle;GO:0005737//cytoplasm	GO:0003674//molecular_function;GO:0016746//transferase activity, transferring acyl groups	GO:0008150//biological_process;GO:0006464//cellular protein modification process;GO:0030154//cell differentiation;GO:0048856//anatomical structure development
ENSDARG00000004497	14.345	10.51	6.545	tetraspanin 33 [Source:ZFIN;Acc:ZDB-GENE-040718-361]	-	GO:0005575//cellular_component;GO:0016021//integral component of membrane	GO:0003674//molecular_function	-
ENSDARG00000004527	67.355	30.34	34.44	protein (peptidylprolyl cis/trans isomerase) NIMA-interacting, 4 (parvulin) [Source:ZFIN;Acc:ZDB-GENE-050522-117]	-	GO:0005575//cellular_component;GO:0005622//intracellular;GO:0005623//cell;GO:0005634//nucleus;GO:0043226//organelle;GO:0005856//cytoskeleton;GO:0005737//cytoplasm	GO:0003674//molecular_function;GO:0016853//isomerase activity;GO:0003677//DNA binding	-
ENSDARG00000004537	3.07	3.95	6.415	-	ko00310//Lysine degradation	GO:0005634//nucleus;GO:0035097//histone methyltransferase complex;GO:0005575//cellular_component;GO:0005622//intracellular;GO:0005623//cell;GO:0005654//nucleoplasm;GO:0043226//organelle;GO:0043234//protein complex	GO:0016740//transferase activity;GO:0008168//methyltransferase activity;GO:0003677//DNA binding;GO:0008270//zinc ion binding;GO:0018024//histone-lysine N-methyltransferase activity;GO:0046872//metal ion binding;GO:0042800//histone methyltransferase activity (H3-K4 specific);GO:0003674//molecular_function;GO:0043167//ion binding	GO:0048823//nucleate erythrocyte development;GO:0035556//intracellular signal transduction;GO:0048339//paraxial mesoderm development;GO:0032259//methylation;GO:0030097//hemopoiesis;GO:0051568//histone H3-K4 methylation;GO:0006355//regulation of transcription, DNA-templated;GO:0008150//biological_process;GO:0006464//cellular protein modification process;GO:0051276//chromosome organization;GO:00023…
ENSDARG00000004576	4.27	3.96	1.575	-	-	-	-	-
ENSDARG00000004588	67.51	47.345	30.655	-	-	-	-	-
ENSDARG00000004597	0.765	0.71	2.025	-	-	-	-	-
ENSDARG00000004647	2.2	2.36	1.15	spindle and centriole associated protein 1 [Source:ZFIN;Acc:ZDB-GENE-041212-64]	-	GO:0005575//cellular_component;GO:0005575//cellular_component	GO:0003674//molecular_function;GO:0003674//molecular_function	GO:0008150//biological_process;GO:0008150//biological_process
ENSDARG00000004648	2.07	1.4	2.965	-	-	-	-	GO:0006810//transport;GO:0006811//ion transport;GO:0051260//protein homooligomerization;GO:0006461//protein complex assembly;GO:0008150//biological_process;GO:0022607//cellular component assembly;GO:0065003
ENSDARG00000004692	9.91	6.4	4.95	-	-	-	-	-
ENSDARG00000004712	4.225	3.115	2.09	T-box, brain, 1b [Source:ZFIN;Acc:ZDB-GENE-000323-1]	-	GO:0005634//nucleus;GO:0005575//cellular_component;GO:0005622//intracellular;GO:0005623//cell;GO:0043226//organelle	GO:0003700//sequence-specific DNA binding transcription factor activity;GO:0003677//DNA binding;GO:0003674//molecular_function;GO:0001071//nucleic acid binding transcription factor activity	GO:0006351//transcription, DNA-templated;GO:0006355//regulation of transcription, DNA-templated;GO:0008150//biological_process;GO:0009058//biosynthetic process;GO:0034641//cellular nitrogen compound metabolic process
ENSDARG00000004713	40.29	29.345	4.94	MAD2 mitotic arrest deficient-like 1 (yeast) [Source:ZFIN;Acc:ZDB-GENE-030515-3]	ko04114//Oocyte meiosis;ko04110//Cell cycle;ko04914//Progesterone-mediated oocyte maturation	-	-	GO:0007094//mitotic spindle assembly checkpoint;GO:0007049//cell cycle;GO:0008150//biological_process
ENSDARG00000004724	3.9	9.06	9.905	-	-	GO:0005634//nucleus;GO:0005575//cellular_component;GO:0005622//intracellular;GO:0005623//cell;GO:0043226//organelle	GO:0003676//nucleic acid binding;GO:0008270//zinc ion binding;GO:0003746//translation elongation factor activity;GO:0003677//DNA binding;GO:0003674//molecular_function;GO:0003723//RNA binding;GO:0008135//translation factor activity, nucleic acid binding;GO:0043167//ion binding	GO:0006414//translational elongation;GO:0006351//transcription, DNA-templated;GO:0006355//regulation of transcription, DNA-templated;GO:0032784//regulation of DNA-templated transcription, elongation;GO:0006357//regulation of transcription from RNA polymerase II promoter;GO:0006412//translation;GO:0008150//biological_process;GO:0009058//biosynthetic process;GO:0034641//cellular nitrogen compound m…
ENSDARG00000004727	11.81	4.995	6.335	-	-	-	-	-
ENSDARG00000004748	19.615	58.25	26.7	zgc:100868 [Source:ZFIN;Acc:ZDB-GENE-040801-33]	-	GO:0005575//cellular_component;GO:0005575//cellular_component	GO:0016787//hydrolase activity;GO:0008236//serine-type peptidase activity;GO:0004252//serine-type endopeptidase activity;GO:0008233//peptidase activity;GO:0003674//molecular_function	GO:0006508//proteolysis;GO:0008150//biological_process
ENSDARG00000004754	36.82	16.56	49.28	heat shock protein 4a [Source:ZFIN;Acc:ZDB-GENE-040426-2832]	-	-	GO:0005524//ATP binding;GO:0000166//nucleotide binding;GO:0003674//molecular_function;GO:0043167//ion binding	-
ENSDARG00000004789	0.265	0.39	0.6	-	-	-	-	-
ENSDARG00000004830	157.695	128.495	76.36	-	ko04910//Insulin signaling pathway	GO:0005575//cellular_component;GO:0005622//intracellular;GO:0005623//cell;GO:0005737//cytoplasm;GO:0005768//endosome;GO:0043226//organelle	GO:0003674//molecular_function	GO:0007155//cell adhesion;GO:0008150//biological_process
ENSDARG00000004840	25.925	21.7	11.68	-	-	-	GO:0046872//metal ion binding;GO:0003674//molecular_function;GO:0043167//ion binding;GO:0046872//metal ion binding;GO:0003674//molecular_function;GO:0043167//ion binding	GO:0007165//signal transduction;GO:0035556//intracellular signal transduction;GO:0008150//biological_process;GO:0007165//signal transduction;GO:0035556//intracellular signal transduction;GO:0008150//biological_process
ENSDARG00000004880	3.07	3.185	1.085	acyl-CoA synthetase medium-chain family member 3 [Source:ZFIN;Acc:ZDB-GENE-080220-22]	ko01100//Metabolic pathways;ko00650//Butanoate metabolism;ko00785//Lipoic acid metabolism	GO:0005575//cellular_component;GO:0005575//cellular_component	GO:0003824//catalytic activity;GO:0003674//molecular_function	GO:0008152//metabolic process;GO:0008150//biological_process
ENSDARG00000004931	0.875	1.095	2.185	-	ko04020//Calcium signaling pathway;ko05414//Dilated cardiomyopathy;ko04260//Cardiac muscle contraction;ko05410//Hypertrophic cardiomyopathy (HCM);ko05412//Arrhythmogenic right ventricular cardiomyopathy (ARVC);ko04961//Endocrine and other factor-regulated calcium reabsorption;ko04974//Protein digestion and absorption;ko04978//Mineral absorption	GO:0016021//integral component of membrane;GO:0016020//membrane;GO:0005575//cellular_component	GO:0005432//calcium:sodium antiporter activity;GO:0003674//molecular_function;GO:0022857//transmembrane transporter activity	GO:0006816//calcium ion transport;GO:0035725//sodium ion transmembrane transport;GO:0055085//transmembrane transport;GO:0007154//cell communication;GO:0008150//biological_process;GO:0006810//transport
ENSDARG00000004937	10.28	7.435	2.245	-	ko05200//Pathways in cancer;ko04120//Ubiquitin mediated proteolysis;ko04110//Cell cycle;ko05222//Small cell lung cancer	-	-	-
ENSDARG00000004954	1.765	3.26	3.89	-	-	-	-	GO:0048675//axon extension;GO:0001889//liver development;GO:0008150//biological_process;GO:0048856//anatomical structure development;GO:0000902//cell morphogenesis;GO:0030154//cell differentiation;GO:0040007//growth
ENSDARG00000004964	5.705	33.415	52.3	cytochrome P450, family 4, subfamily T, polypeptide 8 [Source:ZFIN;Acc:ZDB-GENE-031219-3]	-	-	GO:0016491//oxidoreductase activity;GO:0004497//monooxygenase activity;GO:0016705//oxidoreductase activity, acting on paired donors, with incorporation or reduction of molecular oxygen;GO:0005506//iron ion binding;GO:0046872//metal ion binding;GO:0020037//heme binding;GO:0003674//molecular_function;GO:0043167//ion binding	GO:0055114//oxidation-reduction process;GO:0008150//biological_process
ENSDARG00000004979	12.17	10.58	24.68	ELOVL fatty acid elongase 5 [Source:ZFIN;Acc:ZDB-GENE-040407-2]	ko00062//Fatty acid elongation in mitochondria;ko01040//Biosynthesis of unsaturated fatty acids	GO:0005887//integral component of plasma membrane;GO:0016020//membrane;GO:0016021//integral component of membrane;GO:0005575//cellular_component;GO:0005623//cell;GO:0005886//plasma membrane	GO:0009922//fatty acid elongase activity;GO:0016740//transferase activity;GO:0003674//molecular_function;GO:0016746//transferase activity, transferring acyl groups	GO:0042761//very long-chain fatty acid biosynthetic process;GO:0030497//fatty acid elongation;GO:0006629//lipid metabolic process;GO:0042759//long-chain fatty acid biosynthetic process;GO:0006631//fatty acid metabolic process;GO:0019368//fatty acid elongation, unsaturated fatty acid;GO:0006633//fatty acid biosynthetic process;GO:0008150//biological_process;GO:0009058//biosynthetic process;GO:0044…
ENSDARG00000005004	3.39	5.37	7.825	-	-	-	-	-
ENSDARG00000005023	64.915	23.36	29.33	FK506 binding protein 9 [Source:ZFIN;Acc:ZDB-GENE-040801-23]	-	GO:0005789//endoplasmic reticulum membrane;GO:0005575//cellular_component;GO:0005622//intracellular;GO:0005623//cell;GO:0005737//cytoplasm;GO:0005783//endoplasmic reticulum;GO:0043226//organelle	GO:0005528//FK506 binding;GO:0003755//peptidyl-prolyl cis-trans isomerase activity;GO:0005509//calcium ion binding;GO:0003674//molecular_function;GO:0043167//ion binding;GO:0016853//isomerase activity	GO:0061077//chaperone-mediated protein folding;GO:0006457//protein folding;GO:0008150//biological_process
ENSDARG00000005058	15.48	18.44	5.425	non-SMC condensin I complex, subunit D2 [Source:ZFIN;Acc:ZDB-GENE-050506-59]	-	GO:0005634//nucleus;GO:0005575//cellular_component;GO:0005622//intracellular;GO:0005623//cell;GO:0043226//organelle	-	GO:0000070//mitotic sister chromatid segregation;GO:0007049//cell cycle;GO:0030261//chromosome condensation;GO:0007076//mitotic chromosome condensation;GO:0007067//mitosis;GO:0051301//cell division;GO:0008150//biological_process;GO:0006259//DNA metabolic process;GO:0007059//chromosome segregation;GO:0034641//cellular nitrogen compound metabolic process;GO:0051276//chromosome organization
ENSDARG00000005098	7.03	6.15	1.32	zgc:86764 [Source:ZFIN;Acc:ZDB-GENE-040718-435]	-	GO:0005575//cellular_component;GO:0005575//cellular_component	GO:0008017//microtubule binding;GO:0003674//molecular_function;GO:0008092//cytoskeletal protein binding	GO:0000226//microtubule cytoskeleton organization;GO:0000910//cytokinesis;GO:0007049//cell cycle;GO:0008150//biological_process;GO:0051301//cell division;GO:0007010//cytoskeleton organization
ENSDARG00000005154	2.195	3.44	6.305	aspartoacylase [Source:ZFIN;Acc:ZDB-GENE-080204-11]	ko00250//Alanine, aspartate and glutamate metabolism;ko00340//Histidine metabolism	GO:0005575//cellular_component;GO:0005622//intracellular;GO:0005623//cell;GO:0005737//cytoplasm;GO:0005634//nucleus;GO:0043226//organelle	GO:0003674//molecular_function;GO:0043167//ion binding;GO:0016810//hydrolase activity, acting on carbon-nitrogen (but not peptide) bonds	-
ENSDARG00000005176	7.835	3.785	2.375	zgc:101040 [Source:ZFIN;Acc:ZDB-GENE-040801-107]	ko01100//Metabolic pathways;ko00983//Drug metabolism - other enzymes;ko00232//Caffeine metabolism	GO:0005575//cellular_component;GO:0005575//cellular_component	GO:0016746//transferase activity, transferring acyl groups;GO:0016740//transferase activity;GO:0016407//acetyltransferase activity;GO:0003674//molecular_function	GO:0008152//metabolic process;GO:0008150//biological_process
ENSDARG00000005216	5.64	2.825	1.24	-	-	-	-	-
ENSDARG00000005251	63.33	34.045	24.83	-	ko01100//Metabolic pathways;ko00030//Pentose phosphate pathway;ko00040//Pentose and glucuronate interconversions	GO:0005829//cytosol;GO:0005575//cellular_component;GO:0005622//intracellular;GO:0005623//cell;GO:0005737//cytoplasm;GO:0005829//cytosol	GO:0004750//ribulose-phosphate 3-epimerase activity;GO:0003824//catalytic activity;GO:0046872//metal ion binding;GO:0016853//isomerase activity;GO:0016857//racemase and epimerase activity, acting on carbohydrates and derivatives;GO:0003674//molecular_function;GO:0043167//ion binding	GO:0005975//carbohydrate metabolic process;GO:0009052//pentose-phosphate shunt, non-oxidative branch;GO:0019323;GO:0006098//pentose-phosphate shunt;GO:0044262//cellular carbohydrate metabolic process;GO:0008152//metabolic process;GO:0008150//biological_process;GO:0034641//cellular nitrogen compound metabolic process;GO:0044281//small molecule metabolic process;GO:0051186//cofactor metabolic proce…
ENSDARG00000005271	1.38	1.62	3.54	-	-	-	-	-
ENSDARG00000005274	2.71	2.565	1.005	-	ko03440//Homologous recombination	GO:0005634//nucleus;GO:0005575//cellular_component;GO:0005622//intracellular;GO:0005623//cell;GO:0043226//organelle	GO:0000150//recombinase activity;GO:0003674//molecular_function	GO:0045002//double-strand break repair via single-strand annealing;GO:0006310//DNA recombination;GO:0000724//double-strand break repair via homologous recombination;GO:0006281//DNA repair;GO:0006259//DNA metabolic process;GO:0006950//response to stress;GO:0008150//biological_process;GO:0034641//cellular nitrogen compound metabolic process
ENSDARG00000005335	0.49	1.685	6.01	solute carrier family 22 (organic cation/zwitterion transporter), member 4 [Source:ZFIN;Acc:ZDB-GENE-040426-1517]	-	GO:0016021//integral component of membrane;GO:0016020//membrane;GO:0005575//cellular_component	GO:0022857//transmembrane transporter activity;GO:0005215//transporter activity;GO:0003674//molecular_function	GO:0001887//selenium compound metabolic process;GO:0015698//inorganic anion transport;GO:0055085//transmembrane transport;GO:0050787//detoxification of mercury ion;GO:0051597//response to methylmercury;GO:0008150//biological_process;GO:0006810//transport
ENSDARG00000005454	18.185	19.15	2.335	-	ko03013//RNA transport	GO:0005737//cytoplasm;GO:0015630//microtubule cytoskeleton;GO:0005575//cellular_component;GO:0005622//intracellular;GO:0005623//cell;GO:0005856//cytoskeleton;GO:0043226//organelle;GO:0005737//cytoplasm	GO:0003674//molecular_function;GO:0003674//molecular_function	GO:0008283//cell proliferation;GO:0000226//microtubule cytoskeleton organization;GO:0021987//cerebral cortex development;GO:0008150//biological_process;GO:0048856//anatomical structure development;GO:0007010//cytoskeleton organization;GO:0008283//cell proliferation
ENSDARG00000005462	9.85	13.055	3.115	kinesin family member 4 [Source:ZFIN;Acc:ZDB-GENE-040426-1545]	-	GO:0005871//kinesin complex;GO:0005874//microtubule;GO:0005575//cellular_component;GO:0005622//intracellular;GO:0005623//cell;GO:0005856//cytoskeleton;GO:0043226//organelle;GO:0043234//protein complex	GO:0008574//plus-end-directed microtubule motor activity;GO:0000166//nucleotide binding;GO:0003777//microtubule motor activity;GO:0005524//ATP binding;GO:0008017//microtubule binding;GO:0016887//ATPase activity;GO:0003674//molecular_function;GO:0016887//ATPase activity;GO:0008092//cytoskeletal protein binding;GO:0043167//ion binding	GO:0007018//microtubule-based movement;GO:0008150//biological_process
ENSDARG00000005464	8.565	6.775	2.98	deoxyribonuclease I-like 3 [Source:ZFIN;Acc:ZDB-GENE-040426-2170]	-	GO:0005634//nucleus;GO:0005575//cellular_component;GO:0005622//intracellular;GO:0005623//cell;GO:0005634//nucleus;GO:0043226//organelle	GO:0016787//hydrolase activity;GO:0004520//endodeoxyribonuclease activity;GO:0004518//nuclease activity;GO:0016888//endodeoxyribonuclease activity, producing 5'-phosphomonoesters;GO:0004519//endonuclease activity;GO:0004536//deoxyribonuclease activity;GO:0003674//molecular_function	GO:0006308//DNA catabolic process;GO:0000737//DNA catabolic process, endonucleolytic;GO:0006259//DNA metabolic process;GO:0008150//biological_process;GO:0009056//catabolic process;GO:0034641//cellular nitrogen compound metabolic process;GO:0034655
ENSDARG00000005485	151.605	152.015	56.06	upper zone of growth plate and cartilage matrix associated b [Source:ZFIN;Acc:ZDB-GENE-040426-2368]	-	GO:0005575//cellular_component;GO:0005576//extracellular region;GO:0005578//proteinaceous extracellular matrix	GO:0003674//molecular_function	GO:0008150//biological_process;GO:0009790//embryo development;GO:0048856//anatomical structure development
ENSDARG00000005541	18.56	22.06	10.645	-	-	-	-	-
ENSDARG00000005551	76.85	34.82	38.46	-	-	-	GO:0000166//nucleotide binding;GO:0003676//nucleic acid binding;GO:0003674//molecular_function	-
ENSDARG00000005565	2.055	9.8	15.68	ectonucleoside triphosphate diphosphohydrolase 8 [Source:ZFIN;Acc:ZDB-GENE-040724-142]	ko00230//Purine metabolism;ko00240//Pyrimidine metabolism	-	GO:0016787//hydrolase activity;GO:0003674//molecular_function	-
ENSDARG00000005578	7.8	6.07	17.575	UDP-glucose pyrophosphorylase 2a [Source:ZFIN;Acc:ZDB-GENE-090311-46]	ko01100//Metabolic pathways;ko00520//Amino sugar and nucleotide sugar metabolism;ko00500//Starch and sucrose metabolism;ko00052//Galactose metabolism;ko00040//Pentose and glucuronate interconversions	-	GO:0003983//UTP:glucose-1-phosphate uridylyltransferase activity;GO:0070569//uridylyltransferase activity;GO:0003674//molecular_function;GO:0016779//nucleotidyltransferase activity	GO:0008152//metabolic process;GO:0006011//UDP-glucose metabolic process;GO:0008150//biological_process;GO:0034641//cellular nitrogen compound metabolic process;GO:0044281//small molecule metabolic process
ENSDARG00000005590	4.765	4.725	2.285	metal response element binding transcription factor 2 [Source:ZFIN;Acc:ZDB-GENE-060512-94]	-	GO:0005575//cellular_component;GO:0005575//cellular_component	GO:0008270//zinc ion binding;GO:0046872//metal ion binding;GO:0003674//molecular_function;GO:0043167//ion binding	-
ENSDARG00000005619	3.5	2.59	0.64	NIMA-related kinase 2 [Source:ZFIN;Acc:ZDB-GENE-040426-752]	-	GO:0005737//cytoplasm;GO:0005634//nucleus;GO:0005813//centrosome;GO:0005575//cellular_component;GO:0005622//intracellular;GO:0005623//cell;GO:0005815//microtubule organizing center;GO:0005856//cytoskeleton;GO:0043226//organelle;GO:0005634//nucleus;GO:0005737//cytoplasm	GO:0016301//kinase activity;GO:0004674//protein serine/threonine kinase activity;GO:0016772//transferase activity, transferring phosphorus-containing groups;GO:0004672//protein kinase activity;GO:0005524//ATP binding;GO:0016740//transferase activity;GO:0003674//molecular_function;GO:0043167//ion binding	GO:0007059//chromosome segregation;GO:0006468//protein phosphorylation;GO:0006468//protein phosphorylation;GO:0046548//retinal rod cell development;GO:0016310//phosphorylation;GO:0007017//microtubule-based process;GO:0009966//regulation of signal transduction;GO:0008150//biological_process;GO:0030154//cell differentiation;GO:0048856//anatomical structure development;GO:0006464//cellular protein m…
ENSDARG00000005704	20.26	22.6	43.84	-	-	-	-	-
ENSDARG00000005713	9.58	35.595	17.45	-	-	-	-	-
ENSDARG00000005738	18.595	8.245	15.485	-	-	-	-	-
ENSDARG00000005749	3.565	7.785	11.46	cullin-associated and neddylation-dissociated 2 (putative) [Source:ZFIN;Acc:ZDB-GENE-060503-645]	-	GO:0005634//nucleus;GO:0005575//cellular_component;GO:0005622//intracellular;GO:0005623//cell;GO:0005634//nucleus;GO:0043226//organelle	-	GO:0010265//SCF complex assembly;GO:0016567//protein ubiquitination;GO:0006464//cellular protein modification process;GO:0008150//biological_process;GO:0006461//protein complex assembly;GO:0022607//cellular component assembly;GO:0065003
ENSDARG00000005762	4.37	2.67	1.915	-	-	GO:0005575//cellular_component;GO:0043234//protein complex;GO:0005576//extracellular region;GO:0005578//proteinaceous extracellular matrix	-	-
ENSDARG00000005772	24.97	20.73	54.48	-	-	-	-	-
ENSDARG00000005776	35.53	14.45	7.765	guanylate kinase 1b [Source:ZFIN;Acc:ZDB-GENE-020916-1]	ko01100//Metabolic pathways;ko00230//Purine metabolism	-	GO:0004385//guanylate kinase activity;GO:0016740//transferase activity;GO:0016301//kinase activity;GO:0003674//molecular_function	GO:0016310//phosphorylation;GO:0006163//purine nucleotide metabolic process;GO:0008150//biological_process;GO:0034641//cellular nitrogen compound metabolic process;GO:0044281//small molecule metabolic process
ENSDARG00000005789	21.395	26.07	10.04	-	ko01100//Metabolic pathways;ko00230//Purine metabolism;ko00500//Starch and sucrose metabolism;ko00760//Nicotinate and nicotinamide metabolism;ko00770//Pantothenate and CoA biosynthesis;ko00740//Riboflavin metabolism	GO:0005886//plasma membrane;GO:0005575//cellular_component;GO:0005623//cell	GO:0030247//polysaccharide binding;GO:0003676//nucleic acid binding;GO:0003824//catalytic activity;GO:0004551//nucleotide diphosphatase activity;GO:0016787//hydrolase activity;GO:0046872//metal ion binding;GO:0005044//scavenger receptor activity;GO:0004528//phosphodiesterase I activity;GO:0003674//molecular_function;GO:0004518//nuclease activity;GO:0043167//ion binding	GO:0006955//immune response;GO:0055062//phosphate ion homeostasis;GO:0008152//metabolic process;GO:0030500//regulation of bone mineralization;GO:0008150//biological_process;GO:0042592//homeostatic process;GO:0002376//immune system process
ENSDARG00000005894	1.105	4.91	8.825	-	-	-	-	-
ENSDARG00000005897	7.815	5.76	18.7	deoxyribose-phosphate aldolase (putative) [Source:ZFIN;Acc:ZDB-GENE-041010-200]	ko00030//Pentose phosphate pathway	GO:0005737//cytoplasm;GO:0005575//cellular_component;GO:0005622//intracellular;GO:0005623//cell	GO:0004139//deoxyribose-phosphate aldolase activity;GO:0016829//lyase activity;GO:0003824//catalytic activity;GO:0003674//molecular_function	GO:0009264//deoxyribonucleotide catabolic process;GO:0016052//carbohydrate catabolic process;GO:0005975//carbohydrate metabolic process;GO:0008150//biological_process;GO:0009056//catabolic process;GO:0034641//cellular nitrogen compound metabolic process;GO:0034655;GO:0044281//small molecule metabolic process
ENSDARG00000005913	3.505	22.02	14.43	-	-	-	-	-
ENSDARG00000005993	9.58	8.56	0.92	-	-	GO:0005575//cellular_component;GO:0005575//cellular_component	GO:0008017//microtubule binding;GO:0003674//molecular_function;GO:0008092//cytoskeletal protein binding	GO:0000910//cytokinesis;GO:0000226//microtubule cytoskeleton organization;GO:0007010//cytoskeleton organization;GO:0008150//biological_process;GO:0007049//cell cycle;GO:0051301//cell division
ENSDARG00000006011	0.525	0.41	0.895	-	-	-	-	-
ENSDARG00000006029	59.89	149.67	108.645	leukotriene A4 hydrolase [Source:ZFIN;Acc:ZDB-GENE-040426-2477]	ko01100//Metabolic pathways;ko00590//Arachidonic acid metabolism	GO:0005737//cytoplasm;GO:0005575//cellular_component;GO:0005622//intracellular;GO:0005623//cell	GO:0046872//metal ion binding;GO:0008233//peptidase activity;GO:0004463//leukotriene-A4 hydrolase activity;GO:0008237//metallopeptidase activity;GO:0008270//zinc ion binding;GO:0016787//hydrolase activity;GO:0003674//molecular_function;GO:0043167//ion binding	GO:0006954//inflammatory response;GO:0006508//proteolysis;GO:0019370//leukotriene biosynthetic process;GO:0006629//lipid metabolic process;GO:0008150//biological_process;GO:0009058//biosynthetic process;GO:0044281//small molecule metabolic process;GO:0006950//response to stress
ENSDARG00000006031	34.665	70.965	87.645	4-aminobutyrate aminotransferase [Source:ZFIN;Acc:ZDB-GENE-031006-4]	ko01100//Metabolic pathways;ko00280//Valine, leucine and isoleucine degradation;ko00640//Propanoate metabolism;ko00410//beta-Alanine metabolism;ko00250//Alanine, aspartate and glutamate metabolism;ko00650//Butanoate metabolism	-	GO:0030170//pyridoxal phosphate binding;GO:0003824//catalytic activity;GO:0016740//transferase activity;GO:0003867//4-aminobutyrate transaminase activity;GO:0008483//transaminase activity;GO:0003674//molecular_function;GO:0043167//ion binding	GO:0009448//gamma-aminobutyric acid metabolic process;GO:0006520//cellular amino acid metabolic process;GO:0008150//biological_process;GO:0044281//small molecule metabolic process
ENSDARG00000006038	14.915	9.245	6.41	AE binding protein 2 [Source:ZFIN;Acc:ZDB-GENE-040426-2885]	-	GO:0005575//cellular_component;GO:0005622//intracellular;GO:0005623//cell;GO:0005634//nucleus;GO:0043226//organelle;GO:0005654//nucleoplasm;GO:0043234//protein complex	GO:0003674//molecular_function;GO:0003677//DNA binding;GO:0043167//ion binding	GO:0008150//biological_process;GO:0051276//chromosome organization;GO:0009058//biosynthetic process;GO:0034641//cellular nitrogen compound metabolic process
ENSDARG00000006092	123.905	105.415	56.035	RAD21 homolog (S. pombe) a [Source:ZFIN;Acc:ZDB-GENE-030131-994]	ko04110//Cell cycle	GO:0000228//nuclear chromosome;GO:0005575//cellular_component;GO:0005622//intracellular;GO:0005623//cell;GO:0005634//nucleus;GO:0005694//chromosome;GO:0043226//organelle	GO:0043565//sequence-specific DNA binding;GO:0003674//molecular_function;GO:0003677//DNA binding	GO:0007064//mitotic sister chromatid cohesion;GO:0043280//positive regulation of cysteine-type endopeptidase activity involved in apoptotic process;GO:0006357//regulation of transcription from RNA polymerase II promoter;GO:0008150//biological_process;GO:0008219//cell death;GO:0007049//cell cycle;GO:0007059//chromosome segregation;GO:0007067//mitosis;GO:0051276//chromosome organization
ENSDARG00000006215	52.545	83.69	122.36	aldo-keto reductase family 1, member B1 (aldose reductase) [Source:ZFIN;Acc:ZDB-GENE-040625-7]	-	GO:0005575//cellular_component;GO:0005575//cellular_component	GO:0016491//oxidoreductase activity;GO:0003674//molecular_function	GO:0055114//oxidation-reduction process;GO:0008150//biological_process
ENSDARG00000006242	127.465	83	44.445	-	-	GO:0005575//cellular_component;GO:0005575//cellular_component	GO:0008138//protein tyrosine/serine/threonine phosphatase activity;GO:0016791//phosphatase activity;GO:0003674//molecular_function	GO:0016311//dephosphorylation;GO:0006470//protein dephosphorylation;GO:0006464//cellular protein modification process;GO:0008150//biological_process
ENSDARG00000006266	6.62	10.43	13.905	signal transducer and activator of transcription 1, 91kDa [Source:ZFIN;Acc:ZDB-GENE-980526-499]	ko05200//Pathways in cancer;ko04062//Chemokine signaling pathway;ko05152//Tuberculosis;ko05164//Influenza A;ko05160//Hepatitis C;ko05145//Toxoplasmosis;ko04630//Jak-STAT signaling pathway;ko04380//Osteoclast differentiation;ko05162//Measles;ko04620//Toll-like receptor signaling pathway;ko05212//Pancreatic cancer;ko05140//Leishmaniasis	GO:0005634//nucleus;GO:0005737//cytoplasm;GO:0005575//cellular_component;GO:0005622//intracellular;GO:0005623//cell;GO:0043226//organelle	GO:0003677//DNA binding;GO:0003700//sequence-specific DNA binding transcription factor activity;GO:0004871//signal transducer activity;GO:0003674//molecular_function;GO:0001071//nucleic acid binding transcription factor activity	GO:0006351//transcription, DNA-templated;GO:0006355//regulation of transcription, DNA-templated;GO:0007165//signal transduction;GO:0008150//biological_process;GO:0009058//biosynthetic process;GO:0034641//cellular nitrogen compound metabolic process
ENSDARG00000006308	0.31	1.875	2.4	protein tyrosine phosphatase, non-receptor type 18 [Source:ZFIN;Acc:ZDB-GENE-050320-12]	-	-	GO:0016787//hydrolase activity;GO:0016791//phosphatase activity;GO:0004721//phosphoprotein phosphatase activity;GO:0004725//protein tyrosine phosphatase activity;GO:0003674//molecular_function	GO:0016311//dephosphorylation;GO:0006470//protein dephosphorylation;GO:0006464//cellular protein modification process;GO:0008150//biological_process
ENSDARG00000006383	2.53	2.885	6.98	-	-	GO:0005575//cellular_component;GO:0005623//cell;GO:0005886//plasma membrane;GO:0005622//intracellular;GO:0005737//cytoplasm	-	GO:0006810//transport;GO:0008150//biological_process;GO:0016192//vesicle-mediated transport
ENSDARG00000006408	60.295	30.065	40.87	high mobility group box 3b [Source:ZFIN;Acc:ZDB-GENE-050417-290]	-	GO:0005634//nucleus;GO:0005575//cellular_component;GO:0005622//intracellular;GO:0005623//cell;GO:0005634//nucleus;GO:0043226//organelle	GO:0003682//chromatin binding;GO:0003677//DNA binding;GO:0003674//molecular_function	GO:0006338//chromatin remodeling;GO:0006355//regulation of transcription, DNA-templated;GO:0008150//biological_process;GO:0051276//chromosome organization
ENSDARG00000006427	413.865	1106.29	1473.44	fatty acid binding protein 2, intestinal [Source:ZFIN;Acc:ZDB-GENE-991019-5]	ko03320//PPAR signaling pathway;ko04975//Fat digestion and absorption	-	GO:0008289//lipid binding;GO:0005215//transporter activity;GO:0003674//molecular_function	GO:0006810//transport;GO:0008150//biological_process
ENSDARG00000006447	0.385	2.395	2.355	-	-	-	-	GO:0006810//transport;GO:0008150//biological_process
ENSDARG00000006456	36.99	27.45	11.58	platelet-derived growth factor receptor-like [Source:ZFIN;Acc:ZDB-GENE-040426-901]	-	-	GO:0005515//protein binding;GO:0042802//identical protein binding;GO:0003674//molecular_function	-
ENSDARG00000006491	4.12	5.89	8.33	1-acylglycerol-3-phosphate O-acyltransferase 9, like [Source:ZFIN;Acc:ZDB-GENE-060531-19]	ko01100//Metabolic pathways;ko00564//Glycerophospholipid metabolism;ko00561//Glycerolipid metabolism	GO:0005575//cellular_component;GO:0005622//intracellular;GO:0005623//cell;GO:0005737//cytoplasm;GO:0005783//endoplasmic reticulum;GO:0043226//organelle	GO:0003674//molecular_function;GO:0016746//transferase activity, transferring acyl groups	GO:0006629//lipid metabolic process;GO:0008150//biological_process;GO:0009058//biosynthetic process
ENSDARG00000006501	1.525	2.675	3.8	-	-	-	-	-
ENSDARG00000006514	38.02	31.39	17.175	-	-	-	-	-
ENSDARG00000006522	0.82	4.615	4.97	-	-	-	-	-
ENSDARG00000006526	59.055	142.665	129.465	fibronectin 1b [Source:ZFIN;Acc:ZDB-GENE-030131-6545]	-	GO:0005576//extracellular region;GO:0005575//cellular_component	-	GO:0001756//somitogenesis;GO:0003128//heart field specification;GO:0008150//biological_process;GO:0048646//anatomical structure formation involved in morphogenesis;GO:0048856//anatomical structure development;GO:0009790//embryo development
ENSDARG00000006544	3.8	4.775	1.16	-	-	-	-	-
ENSDARG00000006545	12.36	8.48	4.72	-	-	GO:0005575//cellular_component;GO:0005575//cellular_component;GO:0005575//cellular_component;GO:0005575//cellular_component	GO:0003674//molecular_function;GO:0003674//molecular_function;GO:0003674//molecular_function;GO:0003674//molecular_function	GO:0008150//biological_process;GO:0008150//biological_process;GO:0008150//biological_process;GO:0008150//biological_process
ENSDARG00000006566	15.78	12.315	7.18	nemo-like kinase, type 1 [Source:ZFIN;Acc:ZDB-GENE-040701-1]	ko04010//MAPK signaling pathway;ko04310//Wnt signaling pathway;ko04520//Adherens junction	-	GO:0004674//protein serine/threonine kinase activity;GO:0004672//protein kinase activity;GO:0004707//MAP kinase activity;GO:0005524//ATP binding;GO:0016740//transferase activity;GO:0016301//kinase activity;GO:0000166//nucleotide binding;GO:0016772//transferase activity, transferring phosphorus-containing groups;GO:0003674//molecular_function;GO:0043167//ion binding;GO:0004871//signal transducer a…	GO:0050769//positive regulation of neurogenesis;GO:0045746//negative regulation of Notch signaling pathway;GO:0016310//phosphorylation;GO:0006468//protein phosphorylation;GO:0030177//positive regulation of Wnt signaling pathway;GO:0008150//biological_process;GO:0006464//cellular protein modification process;GO:0030154//cell differentiation;GO:0048856//anatomical structure development
ENSDARG00000006588	22.04	141.68	84.14	-	-	GO:0005575//cellular_component;GO:0005575//cellular_component	GO:0003674//molecular_function;GO:0003674//molecular_function	GO:0008150//biological_process;GO:0008150//biological_process
ENSDARG00000006598	3.48	4.165	1.075	serum/glucocorticoid regulated kinase 2b [Source:ZFIN;Acc:ZDB-GENE-060929-44]	ko04960//Aldosterone-regulated sodium reabsorption	GO:0005575//cellular_component;GO:0005575//cellular_component	GO:0016740//transferase activity;GO:0005524//ATP binding;GO:0004672//protein kinase activity;GO:0016301//kinase activity;GO:0000166//nucleotide binding;GO:0016772//transferase activity, transferring phosphorus-containing groups;GO:0004674//protein serine/threonine kinase activity;GO:0003674//molecular_function;GO:0043167//ion binding	GO:0006468//protein phosphorylation;GO:0016310//phosphorylation;GO:0008150//biological_process;GO:0006464//cellular protein modification process
ENSDARG00000006640	7.315	5.455	3.325	-	-	GO:0005737//cytoplasm;GO:0005634//nucleus;GO:0005575//cellular_component;GO:0005622//intracellular;GO:0005623//cell;GO:0005634//nucleus;GO:0043226//organelle;GO:0005737//cytoplasm	GO:0003677//DNA binding;GO:0005515//protein binding;GO:0003700//sequence-specific DNA binding transcription factor activity;GO:0000981//sequence-specific DNA binding RNA polymerase II transcription factor activity;GO:0001071//nucleic acid binding transcription factor activity;GO:0003674//molecular_function;GO:0003677//DNA binding	GO:0042074//cell migration involved in gastrulation;GO:0001706//endoderm formation;GO:0048382//mesendoderm development;GO:0001714//endodermal cell fate specification;GO:0006357//regulation of transcription from RNA polymerase II promoter;GO:0006355//regulation of transcription, DNA-templated;GO:0048263//determination of dorsal identity;GO:0055109//invagination involved in gastrulation with mouth …
ENSDARG00000006760	5.33	4.485	13.935	-	-	-	-	-
ENSDARG00000006775	0.495	0.745	0.365	-	-	-	-	-
ENSDARG00000006791	9.895	16.18	3.88	-	ko04710//Circadian rhythm - mammal;ko04711//Circadian rhythm - fly	GO:0005634//nucleus;GO:0005667//transcription factor complex;GO:0005737//cytoplasm;GO:0005575//cellular_component;GO:0005622//intracellular;GO:0005623//cell;GO:0043234//protein complex;GO:0043226//organelle	GO:0005515//protein binding;GO:0003677//DNA binding;GO:0046983//protein dimerization activity;GO:0000976//transcription regulatory region sequence-specific DNA binding;GO:0003700//sequence-specific DNA binding transcription factor activity;GO:0046982//protein heterodimerization activity;GO:0004871//signal transducer activity;GO:0003674//molecular_function;GO:0001071//nucleic acid binding transcri…	GO:0009648//photoperiodism;GO:0009416//response to light stimulus;GO:0006355//regulation of transcription, DNA-templated;GO:0045893//positive regulation of transcription, DNA-templated;GO:0007623//circadian rhythm;GO:0045892//negative regulation of transcription, DNA-templated;GO:0006351//transcription, DNA-templated;GO:0007165//signal transduction;GO:0008150//biological_process;GO:0009058//biosy…
ENSDARG00000006811	7.83	13.22	22.21	sulfotransferase family 1, cytosolic sulfotransferase 6 [Source:ZFIN;Acc:ZDB-GENE-040718-343]	-	GO:0005575//cellular_component;GO:0005575//cellular_component	GO:0016232//HNK-1 sulfotransferase activity;GO:0018722;GO:0018725;GO:0019111;GO:0050698//proteoglycan sulfotransferase activity;GO:0004394//heparan sulfate 2-O-sulfotransferase activity;GO:0004304//estrone sulfotransferase activity;GO:0017095//heparan sulfate 6-O-sulfotransferase activity;GO:0018723;GO:0018726;GO:0034930//1-hydroxypyrene sulfotransferase activity;GO:0051922;GO:0001517//N-acetylgl…	-
ENSDARG00000006848	0.645	1.17	1.465	-	-	-	-	-
ENSDARG00000006859	33.905	25.8	16.485	-	-	GO:0005575//cellular_component;GO:0005623//cell;GO:0005886//plasma membrane	GO:0003674//molecular_function	GO:0008150//biological_process
ENSDARG00000006865	6.51	3.475	1.94	-	-	GO:0030054//cell junction;GO:0016021//integral component of membrane;GO:0045211//postsynaptic membrane;GO:0016020//membrane;GO:0045202//synapse;GO:0005886//plasma membrane;GO:0005887//integral component of plasma membrane;GO:0005575//cellular_component;GO:0005623//cell	GO:0016594//glycine binding;GO:0016934//extracellular-glycine-gated chloride channel activity;GO:0005230//extracellular ligand-gated ion channel activity;GO:0022824//transmitter-gated ion channel activity;GO:0003674//molecular_function;GO:0022857//transmembrane transporter activity;GO:0043167//ion binding	GO:0045664//regulation of neuron differentiation;GO:0043200//response to amino acid;GO:0006810//transport;GO:0006811//ion transport;GO:0006821//chloride transport;GO:0007417//central nervous system development;GO:0008150//biological_process;GO:0048856//anatomical structure development;GO:0030154//cell differentiation
ENSDARG00000006889	11.8	6.83	5.685	metallophosphoesterase domain containing 2a [Source:ZFIN;Acc:ZDB-GENE-050417-241]	-	GO:0005575//cellular_component;GO:0005575//cellular_component;GO:0005575//cellular_component;GO:0005575//cellular_component	GO:0016787//hydrolase activity;GO:0003674//molecular_function;GO:0016787//hydrolase activity;GO:0003674//molecular_function	-
ENSDARG00000006894	0.34	0.75	1.27	opioid receptor, kappa 1 [Source:ZFIN;Acc:ZDB-GENE-030729-1]	ko04080//Neuroactive ligand-receptor interaction	GO:0016021//integral component of membrane;GO:0043005//neuron projection;GO:0016020//membrane;GO:0005887//integral component of plasma membrane;GO:0005575//cellular_component;GO:0005623//cell;GO:0005886//plasma membrane	GO:0004930//G-protein coupled receptor activity;GO:0004871//signal transducer activity;GO:0004985//opioid receptor activity;GO:0042923//neuropeptide binding;GO:0042277//peptide binding;GO:0038048//dynorphin receptor activity;GO:0003674//molecular_function	GO:0007165//signal transduction;GO:0007186//G-protein coupled receptor signaling pathway;GO:0007218//neuropeptide signaling pathway;GO:0007268//synaptic transmission;GO:0019233//sensory perception of pain;GO:0007187//G-protein coupled receptor signaling pathway, coupled to cyclic nucleotide second messenger;GO:0008150//biological_process;GO:0050877//neurological system process;GO:0007267//cell-ce…
ENSDARG00000006900	21.43	11.515	10.445	-	ko01100//Metabolic pathways;ko00230//Purine metabolism;ko00983//Drug metabolism - other enzymes	GO:0005634//nucleus;GO:0005737//cytoplasm;GO:0005575//cellular_component;GO:0005622//intracellular;GO:0005623//cell;GO:0043226//organelle	GO:0003824//catalytic activity;GO:0003938//IMP dehydrogenase activity;GO:0016491//oxidoreductase activity;GO:0046872//metal ion binding;GO:0003674//molecular_function;GO:0043167//ion binding	GO:0055114//oxidation-reduction process;GO:0006164//purine nucleotide biosynthetic process;GO:0006177//GMP biosynthetic process;GO:0008150//biological_process;GO:0009058//biosynthetic process;GO:0034641//cellular nitrogen compound metabolic process;GO:0044281//small molecule metabolic process
ENSDARG00000006983	17.525	11.58	7.01	-	-	-	-	-
ENSDARG00000007009	4.73	1.96	2.05	-	-	-	-	-
ENSDARG00000007024	95.61	179.17	208.15	urate oxidase [Source:ZFIN;Acc:ZDB-GENE-030826-24]	ko01100//Metabolic pathways;ko00230//Purine metabolism;ko00232//Caffeine metabolism	GO:0005777//peroxisome;GO:0005575//cellular_component;GO:0005622//intracellular;GO:0005623//cell;GO:0005737//cytoplasm;GO:0043226//organelle	GO:0016491//oxidoreductase activity;GO:0004846//urate oxidase activity;GO:0003674//molecular_function	GO:0006144//purine nucleobase metabolic process;GO:0019628//urate catabolic process;GO:0055114//oxidation-reduction process;GO:0008150//biological_process;GO:0009056//catabolic process;GO:0034641//cellular nitrogen compound metabolic process;GO:0044281//small molecule metabolic process
ENSDARG00000007040	1.165	5.205	23.965	-	-	-	-	-
ENSDARG00000007080	1.605	5.19	18.715	Rh family, C glycoprotein, like 1 [Source:ZFIN;Acc:ZDB-GENE-060209-2]	-	GO:0005575//cellular_component;GO:0005575//cellular_component	GO:0003674//molecular_function;GO:0022857//transmembrane transporter activity;GO:0003674//molecular_function;GO:0022857//transmembrane transporter activity	GO:0006810//transport;GO:0008150//biological_process;GO:0006810//transport;GO:0008150//biological_process
ENSDARG00000007086	0.97	5.36	3.99	-	-	GO:0016021//integral component of membrane;GO:0005887//integral component of plasma membrane;GO:0016020//membrane;GO:0005575//cellular_component;GO:0005623//cell;GO:0005886//plasma membrane	GO:0015105//arsenite transmembrane transporter activity;GO:0005372//water transmembrane transporter activity;GO:0015168//glycerol transmembrane transporter activity;GO:0005215//transporter activity;GO:0015254//glycerol channel activity;GO:0015250//water channel activity;GO:0015204//urea transmembrane transporter activity;GO:0003674//molecular_function;GO:0022857//transmembrane transporter activity	GO:0009992//cellular water homeostasis;GO:0006810//transport;GO:0071918//urea transmembrane transport;GO:0008150//biological_process;GO:0055085//transmembrane transport;GO:0042592//homeostatic process
ENSDARG00000007097	5.62	3.28	1.8	hairy-related 13 [Source:ZFIN;Acc:ZDB-GENE-050228-1]	-	GO:0005634//nucleus;GO:0005575//cellular_component;GO:0005622//intracellular;GO:0005623//cell;GO:0043226//organelle	GO:0003677//DNA binding;GO:0046983//protein dimerization activity;GO:0003674//molecular_function	GO:0006351//transcription, DNA-templated;GO:0006355//regulation of transcription, DNA-templated;GO:0008150//biological_process;GO:0009058//biosynthetic process;GO:0034641//cellular nitrogen compound metabolic process
ENSDARG00000007099	23.23	13.29	7.97	-	-	-	-	-
ENSDARG00000007127	20.635	16.91	8.87	acetyl-CoA acetyltransferase 2 [Source:ZFIN;Acc:ZDB-GENE-990714-22]	ko01100//Metabolic pathways;ko00280//Valine, leucine and isoleucine degradation;ko00310//Lysine degradation;ko00380//Tryptophan metabolism;ko00620//Pyruvate metabolism;ko00071//Fatty acid metabolism;ko00640//Propanoate metabolism;ko04975//Fat digestion and absorption;ko00650//Butanoate metabolism;ko00630//Glyoxylate and dicarboxylate metabolism;ko00900//Terpenoid backbone biosynthesis;ko00072//Sy…	-	GO:0016740//transferase activity;GO:0016747//transferase activity, transferring acyl groups other than amino-acyl groups;GO:0003824//catalytic activity;GO:0003674//molecular_function;GO:0016746//transferase activity, transferring acyl groups	GO:0008152//metabolic process;GO:0008150//biological_process
ENSDARG00000007130	24.52	12.525	34.635	mRNA turnover 4 homolog (S. cerevisiae) [Source:ZFIN;Acc:ZDB-GENE-050417-142]	-	GO:0005575//cellular_component;GO:0005622//intracellular;GO:0005623//cell	GO:0003674//molecular_function	GO:0008150//biological_process;GO:0042254//ribosome biogenesis
ENSDARG00000007151	0.505	0.205	1.15	potassium channel, subfamily K, member 2b [Source:ZFIN;Acc:ZDB-GENE-051120-69]	-	GO:0005887//integral component of plasma membrane;GO:0016020//membrane;GO:0016021//integral component of membrane;GO:0005575//cellular_component;GO:0005623//cell;GO:0005886//plasma membrane	GO:0005267//potassium channel activity;GO:0015271//outward rectifier potassium channel activity;GO:0022841//potassium ion leak channel activity;GO:0003674//molecular_function;GO:0022857//transmembrane transporter activity	GO:0006811//ion transport;GO:0071805//potassium ion transmembrane transport;GO:0030322//stabilization of membrane potential;GO:0006810//transport;GO:0008150//biological_process;GO:0055085//transmembrane transport
ENSDARG00000007196	40.39	27.68	19.64	ribonucleic acid export 1 [Source:ZFIN;Acc:ZDB-GENE-040426-1029]	ko03013//RNA transport;ko05164//Influenza A	GO:0005575//cellular_component;GO:0005622//intracellular;GO:0005623//cell;GO:0005737//cytoplasm	-	-
ENSDARG00000007217	5.99	3.185	6.97	WD repeat domain 55 [Source:ZFIN;Acc:ZDB-GENE-040924-7]	-	-	GO:0005515//protein binding;GO:0003674//molecular_function	-
ENSDARG00000007221	12.005	13.42	2.675	-	-	GO:0005575//cellular_component	GO:0003674//molecular_function;GO:0016301//kinase activity;GO:0043167//ion binding	GO:0008150//biological_process;GO:0006464//cellular protein modification process
ENSDARG00000007250	13.735	8.855	6.2	-	ko04130//SNARE interactions in vesicular transport	-	-	-
ENSDARG00000007276	78.195	1720.1	3663.37	-	-	-	-	-
ENSDARG00000007278	4.22	3.91	1.02	epithelial cell transforming 2 [Source:ZFIN;Acc:ZDB-GENE-040831-2]	-	GO:0005634//nucleus;GO:0005737//cytoplasm;GO:0005575//cellular_component;GO:0005622//intracellular;GO:0005623//cell;GO:0043226//organelle	GO:0005085//guanyl-nucleotide exchange factor activity;GO:0005089//Rho guanyl-nucleotide exchange factor activity;GO:0005096//GTPase activator activity;GO:0003674//molecular_function;GO:0030234//enzyme regulator activity	GO:0035023//regulation of Rho protein signal transduction;GO:0000910//cytokinesis;GO:0045666//positive regulation of neuron differentiation;GO:0035556//intracellular signal transduction;GO:0000902//cell morphogenesis;GO:0008150//biological_process;GO:0048856//anatomical structure development;GO:0007165//signal transduction;GO:0030154//cell differentiation;GO:0007049//cell cycle;GO:0051301//cell d…
ENSDARG00000007285	120.855	52.975	71.075	-	-	GO:0005575//cellular_component;GO:0005622//intracellular;GO:0005623//cell;GO:0005737//cytoplasm;GO:0005739//mitochondrion;GO:0043226//organelle;GO:0005840//ribosome	-	-
ENSDARG00000007315	17.04	11.815	6.845	-	-	GO:0000793//condensed chromosome;GO:0016021//integral component of membrane;GO:0042175//nuclear outer membrane-endoplasmic reticulum membrane network;GO:0005575//cellular_component;GO:0005623//cell;GO:0005622//intracellular;GO:0005694//chromosome;GO:0043226//organelle	GO:0003682//chromatin binding;GO:0003677//DNA binding;GO:0003674//molecular_function	GO:0007084//mitotic nuclear envelope reassembly;GO:0007049//cell cycle;GO:0008150//biological_process;GO:0061024//membrane organization
ENSDARG00000007344	4.09	8.25	6.5	titin-cap (telethonin) [Source:ZFIN;Acc:ZDB-GENE-070501-5]	-	GO:0030018//Z disc;GO:0005575//cellular_component;GO:0005622//intracellular;GO:0005623//cell;GO:0005737//cytoplasm;GO:0043226//organelle	-	GO:0033292//T-tubule organization;GO:0060047//heart contraction;GO:0055001//muscle cell development;GO:0008150//biological_process;GO:0030154//cell differentiation;GO:0048856//anatomical structure development;GO:0003013;GO:0007009//plasma membrane organization;GO:0061024//membrane organization
ENSDARG00000007358	0.025	0.44	0.07	-	ko04062//Chemokine signaling pathway;ko04060//Cytokine-cytokine receptor interaction	-	-	-
ENSDARG00000007359	27.77	15.49	10.645	ubiquitin-like 4A [Source:HGNC Symbol;Acc:HGNC:12505]	-	GO:0005575//cellular_component;GO:0005622//intracellular;GO:0005623//cell;GO:0005737//cytoplasm;GO:0005829//cytosol;GO:0043234//protein complex	GO:0003674//molecular_function	GO:0006810//transport;GO:0008150//biological_process
ENSDARG00000007366	8.15	7.69	3.47	-	-	-	-	-
ENSDARG00000007370	2.885	1.42	1.035	-	-	GO:0042383//sarcolemma;GO:0016021//integral component of membrane;GO:0030315//T-tubule;GO:0005575//cellular_component;GO:0005623//cell;GO:0005886//plasma membrane	GO:0005509//calcium ion binding;GO:0003674//molecular_function;GO:0043167//ion binding	GO:0001778//plasma membrane repair;GO:0048644//muscle organ morphogenesis;GO:0033292//T-tubule organization;GO:0007009//plasma membrane organization;GO:0008150//biological_process;GO:0030154//cell differentiation;GO:0048856//anatomical structure development;GO:0061024//membrane organization;GO:0006950//response to stress
ENSDARG00000007377	53.13	21.665	17.255	-	ko01100//Metabolic pathways;ko00330//Arginine and proline metabolism;ko00480//Glutathione metabolism	GO:0005737//cytoplasm;GO:0005575//cellular_component;GO:0005622//intracellular;GO:0005623//cell;GO:0005737//cytoplasm	GO:0003824//catalytic activity;GO:0004586//ornithine decarboxylase activity;GO:0003674//molecular_function;GO:0016829//lyase activity	GO:0042462//eye photoreceptor cell development;GO:0033387//putrescine biosynthetic process from ornithine;GO:0006596//polyamine biosynthetic process;GO:0008150//biological_process;GO:0009058//biosynthetic process;GO:0034641//cellular nitrogen compound metabolic process;GO:0006520//cellular amino acid metabolic process;GO:0044281//small molecule metabolic process;GO:0030154//cell differentiation;G…
ENSDARG00000007382	8.765	3.595	4.36	-	-	GO:0005575//cellular_component;GO:0005575//cellular_component	GO:0003674//molecular_function;GO:0003674//molecular_function	-
ENSDARG00000007396	17.62	15.84	8.41	Rho family GTPase 3b [Source:ZFIN;Acc:ZDB-GENE-040718-331]	-	GO:0016020//membrane;GO:0005622//intracellular;GO:0005575//cellular_component;GO:0005623//cell	GO:0005525//GTP binding;GO:0000166//nucleotide binding;GO:0003674//molecular_function;GO:0043167//ion binding	GO:0007264//small GTPase mediated signal transduction;GO:0007165//signal transduction;GO:0008150//biological_process
ENSDARG00000007406	4.57	2.845	1.92	paired-like homeobox 2a [Source:ZFIN;Acc:ZDB-GENE-000223-14]	-	GO:0005634//nucleus;GO:0005575//cellular_component;GO:0005622//intracellular;GO:0005623//cell;GO:0043226//organelle	GO:0003677//DNA binding;GO:0043565//sequence-specific DNA binding;GO:0003674//molecular_function	GO:0003357//noradrenergic neuron differentiation;GO:0048666//neuron development;GO:0007420//brain development;GO:0006355//regulation of transcription, DNA-templated;GO:0021703//locus ceruleus development;GO:0008150//biological_process;GO:0048856//anatomical structure development;GO:0030154//cell differentiation
ENSDARG00000007407	12.975	8.455	3.765	-	-	-	-	-
ENSDARG00000007421	53.535	53.08	21.93	formimidoyltransferase cyclodeaminase [Source:ZFIN;Acc:ZDB-GENE-030131-9643]	ko01100//Metabolic pathways;ko00340//Histidine metabolism;ko00670//One carbon pool by folate	GO:0005794//Golgi apparatus;GO:0005575//cellular_component;GO:0005622//intracellular;GO:0005623//cell;GO:0005737//cytoplasm;GO:0005794//Golgi apparatus;GO:0043226//organelle	GO:0016740//transferase activity;GO:0005542//folic acid binding;GO:0003824//catalytic activity;GO:0003674//molecular_function;GO:0043167//ion binding	GO:0008152//metabolic process;GO:0044237//cellular metabolic process;GO:0008150//biological_process
ENSDARG00000007429	6.72	4.31	2.545	-	-	-	-	-
ENSDARG00000007430	6.73	4.66	2.84	PR domain containing 12b [Source:ZFIN;Acc:ZDB-GENE-041114-172]	-	-	GO:0046872//metal ion binding;GO:0003676//nucleic acid binding;GO:0003674//molecular_function;GO:0043167//ion binding	GO:0021521//ventral spinal cord interneuron specification;GO:0008150//biological_process;GO:0030154//cell differentiation;GO:0048856//anatomical structure development
ENSDARG00000007436	2.13	1.975	0.965	-	-	GO:0005575//cellular_component;GO:0005623//cell;GO:0005886//plasma membrane	GO:0003674//molecular_function;GO:0004871//signal transducer activity	GO:0008150//biological_process;GO:0007165//signal transduction;GO:0003013
ENSDARG00000007443	3.33	2.445	1.635	F-box and leucine-rich repeat protein 18 [Source:ZFIN;Acc:ZDB-GENE-050913-65]	-	GO:0005575//cellular_component;GO:0005575//cellular_component	GO:0003674//molecular_function;GO:0003674//molecular_function	GO:0008150//biological_process;GO:0008150//biological_process
ENSDARG00000007465	0.635	0.41	0.97	-	-	-	-	-
ENSDARG00000007480	11.31	3.825	16.4	retinal pigment epithelium-specific protein 65a [Source:ZFIN;Acc:ZDB-GENE-040426-1717]	-	GO:0005575//cellular_component;GO:0005623//cell;GO:0005886//plasma membrane;GO:0005622//intracellular;GO:0005737//cytoplasm	GO:0003674//molecular_function;GO:0043167//ion binding	GO:0008150//biological_process;GO:0050877//neurological system process
ENSDARG00000007490	0.885	1.045	2.375	adrenoceptor beta 1 [Source:ZFIN;Acc:ZDB-GENE-081022-145]	ko04080//Neuroactive ligand-receptor interaction;ko04144//Endocytosis;ko04020//Calcium signaling pathway;ko04540//Gap junction;ko05414//Dilated cardiomyopathy;ko04970//Salivary secretion	GO:0005886//plasma membrane;GO:0016020//membrane;GO:0016021//integral component of membrane;GO:0005575//cellular_component;GO:0005623//cell	GO:0004930//G-protein coupled receptor activity;GO:0004871//signal transducer activity;GO:0004935//adrenergic receptor activity;GO:0003674//molecular_function	GO:0002027//regulation of heart rate;GO:0007186//G-protein coupled receptor signaling pathway;GO:0007165//signal transduction;GO:0008150//biological_process
ENSDARG00000007561	0.12	0.15	0.39	-	-	-	-	-
ENSDARG00000007582	0.075	0.3	0.425	si:ch1073-155h21.1 [Source:ZFIN;Acc:ZDB-GENE-030131-2664]	-	GO:0016021//integral component of membrane;GO:0005886//plasma membrane;GO:0016020//membrane;GO:0005575//cellular_component;GO:0005623//cell	GO:0004930//G-protein coupled receptor activity;GO:0004871//signal transducer activity;GO:0003674//molecular_function	GO:0007186//G-protein coupled receptor signaling pathway;GO:0007165//signal transduction;GO:0008150//biological_process
ENSDARG00000007641	4.775	2.7	1.16	muscle segment homeobox E [Source:ZFIN;Acc:ZDB-GENE-980526-312]	-	GO:0005634//nucleus;GO:0005575//cellular_component;GO:0005622//intracellular;GO:0005623//cell;GO:0043226//organelle	GO:0003677//DNA binding;GO:0043565//sequence-specific DNA binding;GO:0003674//molecular_function	GO:0043049//otic placode formation;GO:0006355//regulation of transcription, DNA-templated;GO:0008150//biological_process;GO:0009790//embryo development;GO:0048646//anatomical structure formation involved in morphogenesis;GO:0048856//anatomical structure development
ENSDARG00000007682	234.9	258.125	95.94	-	-	-	-	GO:0008150//biological_process;GO:0048856//anatomical structure development;GO:0030154//cell differentiation;GO:0008283//cell proliferation
ENSDARG00000007697	1524.58	596.73	413.12	-	ko03320//PPAR signaling pathway	-	GO:0008289//lipid binding;GO:0005215//transporter activity;GO:0005504//fatty acid binding;GO:0003674//molecular_function;GO:0043167//ion binding	GO:0006810//transport;GO:0008150//biological_process
ENSDARG00000007734	5.11	5.145	2.115	oligonucleotide/oligosaccharide-binding fold containing 1 [Source:ZFIN;Acc:ZDB-GENE-040426-1390]	-	GO:0005575//cellular_component;GO:0005622//intracellular;GO:0005623//cell;GO:0005634//nucleus;GO:0043226//organelle;GO:0005694//chromosome;GO:0000228//nuclear chromosome	GO:0003674//molecular_function;GO:0003677//DNA binding	GO:0006259//DNA metabolic process;GO:0008150//biological_process;GO:0034641//cellular nitrogen compound metabolic process;GO:0042592//homeostatic process;GO:0051276//chromosome organization
ENSDARG00000007755	23.625	15.84	11.015	-	-	-	-	-
ENSDARG00000007769	0.555	4.41	5.005	-	-	GO:0005575//cellular_component;GO:0005575//cellular_component	GO:0018721;GO:0018724;GO:0018727;GO:0050694//galactose 3-O-sulfotransferase activity;GO:0080131//hydroxyjasmonate sulfotransferase activity;GO:0001537//N-acetylgalactosamine 4-O-sulfotransferase activity;GO:0016232//HNK-1 sulfotransferase activity;GO:0018722;GO:0018725;GO:0019111;GO:0050698//proteoglycan sulfotransferase activity;GO:0004394//heparan sulfate 2-O-sulfotransferase activity;GO:000814…	-
ENSDARG00000007783	0.175	0.345	0.68	-	-	GO:0031234//extrinsic component of cytoplasmic side of plasma membrane;GO:0005575//cellular_component;GO:0005622//intracellular;GO:0005623//cell;GO:0005886//plasma membrane	GO:0004713//protein tyrosine kinase activity;GO:0004672//protein kinase activity;GO:0005524//ATP binding;GO:0016740//transferase activity;GO:0005102//receptor binding;GO:0016772//transferase activity, transferring phosphorus-containing groups;GO:0016301//kinase activity;GO:0000166//nucleotide binding;GO:0004715//non-membrane spanning protein tyrosine kinase activity;GO:0003674//molecular_function…	GO:0016310//phosphorylation;GO:0030217//T cell differentiation;GO:0007169//transmembrane receptor protein tyrosine kinase signaling pathway;GO:0006468//protein phosphorylation;GO:0071375//cellular response to peptide hormone stimulus;GO:0050853//B cell receptor signaling pathway;GO:0045087//innate immune response;GO:0038083//peptidyl-tyrosine autophosphorylation;GO:0042127//regulation of cell pro…
ENSDARG00000007788	28.725	10.66	10.17	ATPase, Ca++ transporting, plasma membrane 1b [Source:ZFIN;Acc:ZDB-GENE-080409-1]	-	GO:0016020//membrane;GO:0016021//integral component of membrane;GO:0005575//cellular_component	GO:0016787//hydrolase activity;GO:0000166//nucleotide binding;GO:0005388//calcium-transporting ATPase activity;GO:0005524//ATP binding;GO:0046872//metal ion binding;GO:0003674//molecular_function;GO:0043167//ion binding;GO:0016887//ATPase activity;GO:0022857//transmembrane transporter activity	GO:0006810//transport;GO:0070588//calcium ion transmembrane transport;GO:0006811//ion transport;GO:0006816//calcium ion transport;GO:0008150//biological_process;GO:0055085//transmembrane transport
ENSDARG00000007836	1201.65	618.92	159.625	-	ko04145//Phagosome;ko04142//Lysosome;ko05323//Rheumatoid arthritis;ko04612//Antigen processing and presentation	-	GO:0016787//hydrolase activity;GO:0008234//cysteine-type peptidase activity;GO:0008233//peptidase activity;GO:0003674//molecular_function	GO:0006508//proteolysis;GO:0008150//biological_process
ENSDARG00000007856	0.38	1.32	1.55	-	-	-	-	-
ENSDARG00000007885	2.55	2.505	1.225	Fanconi anemia, complementation group L [Source:ZFIN;Acc:ZDB-GENE-040426-1045]	ko04120//Ubiquitin mediated proteolysis	GO:0043240//Fanconi anaemia nuclear complex;GO:0005575//cellular_component;GO:0005622//intracellular;GO:0005623//cell;GO:0005634//nucleus;GO:0005654//nucleoplasm;GO:0043226//organelle;GO:0043234//protein complex	GO:0046872//metal ion binding;GO:0008270//zinc ion binding;GO:0004842//ubiquitin-protein ligase activity;GO:0003674//molecular_function;GO:0043167//ion binding	GO:0016567//protein ubiquitination;GO:0048599//oocyte development;GO:0006281//DNA repair;GO:0006259//DNA metabolic process;GO:0006950//response to stress;GO:0008150//biological_process;GO:0034641//cellular nitrogen compound metabolic process;GO:0000003//reproduction;GO:0030154//cell differentiation;GO:0048856//anatomical structure development;GO:0006464//cellular protein modification process
ENSDARG00000007891	6.53	4.195	2.52	-	-	GO:0005575//cellular_component;GO:0005622//intracellular;GO:0005623//cell;GO:0005634//nucleus;GO:0043226//organelle;GO:0005737//cytoplasm	GO:0001071//nucleic acid binding transcription factor activity;GO:0003674//molecular_function;GO:0003677//DNA binding	GO:0002376//immune system process;GO:0008150//biological_process;GO:0048856//anatomical structure development;GO:0009790//embryo development;GO:0030154//cell differentiation;GO:0009058//biosynthetic process;GO:0034641//cellular nitrogen compound metabolic process
ENSDARG00000007906	0.165	3.74	7.73	-	-	GO:0005575//cellular_component	GO:0003674//molecular_function;GO:0043167//ion binding	-
ENSDARG00000007918	14.005	7.215	19.275	-	-	-	-	-
ENSDARG00000007941	21.475	16.4	10.135	H6 family homeobox 4 [Source:ZFIN;Acc:ZDB-GENE-060825-142]	-	GO:0005634//nucleus;GO:0005575//cellular_component;GO:0005622//intracellular;GO:0005623//cell;GO:0043226//organelle	GO:0003677//DNA binding;GO:0043565//sequence-specific DNA binding;GO:0003674//molecular_function	GO:1900052//regulation of retinoic acid biosynthetic process;GO:0006355//regulation of transcription, DNA-templated;GO:0008150//biological_process
ENSDARG00000007971	7.405	8.88	1.035	CDC28 protein kinase regulatory subunit 1B [Source:ZFIN;Acc:ZDB-GENE-040801-112]	-	GO:0005575//cellular_component;GO:0005575//cellular_component	GO:0016538//cyclin-dependent protein serine/threonine kinase regulator activity;GO:0003674//molecular_function;GO:0030234//enzyme regulator activity	GO:0051301//cell division;GO:0007049//cell cycle;GO:0008150//biological_process
ENSDARG00000007975	24.585	28.565	11.98	ferritin, heavy polypeptide 1b [Source:ZFIN;Acc:ZDB-GENE-040912-30]	-	GO:0005575//cellular_component;GO:0005575//cellular_component	GO:0008199//ferric iron binding;GO:0046872//metal ion binding;GO:0003674//molecular_function;GO:0043167//ion binding	GO:0006879//cellular iron ion homeostasis;GO:0006826//iron ion transport;GO:0006810//transport;GO:0008150//biological_process;GO:0042592//homeostatic process
ENSDARG00000007976	3.27	1.83	6.21	-	-	-	-	-
ENSDARG00000007982	9.665	6.215	4.825	one cut homeobox 1 [Source:ZFIN;Acc:ZDB-GENE-040426-1469]	-	GO:0005634//nucleus;GO:0005575//cellular_component;GO:0005622//intracellular;GO:0005623//cell;GO:0043226//organelle	GO:0003677//DNA binding;GO:0001077//RNA polymerase II core promoter proximal region sequence-specific DNA binding transcription factor activity involved in positive regulation of transcription;GO:0001071//nucleic acid binding transcription factor activity;GO:0003674//molecular_function	GO:0001889//liver development;GO:0030154//cell differentiation;GO:0006355//regulation of transcription, DNA-templated;GO:0035622//intrahepatic bile duct development;GO:0006351//transcription, DNA-templated;GO:0008150//biological_process;GO:0009058//biosynthetic process;GO:0034641//cellular nitrogen compound metabolic process;GO:0048856//anatomical structure development;GO:0030154//cell differenti…
ENSDARG00000007989	128.38	78.53	52.62	-	-	-	-	-
ENSDARG00000007990	2.165	1.8	0.955	wilms tumor 1b [Source:ZFIN;Acc:ZDB-GENE-050420-319]	-	GO:0005737//cytoplasm;GO:0005634//nucleus;GO:0005575//cellular_component;GO:0005622//intracellular;GO:0005623//cell;GO:0005634//nucleus;GO:0043226//organelle;GO:0005737//cytoplasm;GO:0005737//cytoplasm;GO:0005634//nucleus;GO:0005575//cellular_component;GO:0005622//intracellular;GO:0005623//cell;GO:0005634//nucleus;GO:0043226//organelle;GO:0005737//cytoplasm	GO:0046872//metal ion binding;GO:0003676//nucleic acid binding;GO:0003700//sequence-specific DNA binding transcription factor activity;GO:0001071//nucleic acid binding transcription factor activity;GO:0003674//molecular_function;GO:0043167//ion binding;GO:0046872//metal ion binding;GO:0003676//nucleic acid binding;GO:0003700//sequence-specific DNA binding transcription factor activity;GO:0001071/…	GO:0048793//pronephros development;GO:0071371//cellular response to gonadotropin stimulus;GO:0072112//glomerular visceral epithelial cell differentiation;GO:0006355//regulation of transcription, DNA-templated;GO:0043066//negative regulation of apoptotic process;GO:0071320//cellular response to cAMP;GO:0008285//negative regulation of cell proliferation;GO:0008150//biological_process;GO:0030154//ce…
ENSDARG00000008022	3.39	3.985	1.2	kinesin family member 18A [Source:ZFIN;Acc:ZDB-GENE-040426-862]	-	GO:0005871//kinesin complex;GO:0005874//microtubule;GO:0005575//cellular_component;GO:0005622//intracellular;GO:0005623//cell;GO:0005856//cytoskeleton;GO:0043226//organelle;GO:0043234//protein complex	GO:0005524//ATP binding;GO:0003777//microtubule motor activity;GO:0016887//ATPase activity;GO:0008017//microtubule binding;GO:0008574//plus-end-directed microtubule motor activity;GO:0000166//nucleotide binding;GO:0003674//molecular_function;GO:0016887//ATPase activity;GO:0008092//cytoskeletal protein binding;GO:0043167//ion binding	GO:0000070//mitotic sister chromatid segregation;GO:0007018//microtubule-based movement;GO:0007019//microtubule depolymerization;GO:0007010//cytoskeleton organization;GO:0008150//biological_process;GO:0007049//cell cycle;GO:0007059//chromosome segregation;GO:0007067//mitosis;GO:0051276//chromosome organization
ENSDARG00000008029	0.18	8.265	26.76	meprin A, alpha (PABA peptide hydrolase), tandem duplicate 2 [Source:ZFIN;Acc:ZDB-GENE-041001-208]	-	GO:0016020//membrane;GO:0005575//cellular_component	GO:0046872//metal ion binding;GO:0008237//metallopeptidase activity;GO:0004222//metalloendopeptidase activity;GO:0008270//zinc ion binding;GO:0016787//hydrolase activity;GO:0008233//peptidase activity;GO:0003674//molecular_function;GO:0043167//ion binding	GO:0045766//positive regulation of angiogenesis;GO:0006508//proteolysis;GO:0008150//biological_process
ENSDARG00000008131	11.73	9.105	5.375	SRY (sex determining region Y)-box 1b [Source:ZFIN;Acc:ZDB-GENE-060322-5]	-	GO:0005575//cellular_component;GO:0005622//intracellular;GO:0005623//cell;GO:0005634//nucleus;GO:0043226//organelle;GO:0043234//protein complex	GO:0001071//nucleic acid binding transcription factor activity;GO:0003674//molecular_function;GO:0003677//DNA binding	GO:0008150//biological_process
ENSDARG00000008155	31.085	21.175	13.655	-	ko01100//Metabolic pathways;ko00330//Arginine and proline metabolism;ko00480//Glutathione metabolism;ko00270//Cysteine and methionine metabolism;ko00410//beta-Alanine metabolism	GO:0005575//cellular_component;GO:0005575//cellular_component	GO:0016768//spermine synthase activity;GO:0003824//catalytic activity;GO:0016740//transferase activity;GO:0003674//molecular_function;GO:0016765//transferase activity, transferring alkyl or aryl (other than methyl) groups	GO:0006597//spermine biosynthetic process;GO:0008150//biological_process;GO:0009058//biosynthetic process;GO:0034641//cellular nitrogen compound metabolic process
ENSDARG00000008263	1.42	3.305	3.38	-	-	-	-	-
ENSDARG00000008275	14.935	38.185	19.7	-	-	GO:0005575//cellular_component;GO:0005575//cellular_component	-	GO:2000312//regulation of kainate selective glutamate receptor activity;GO:0008150//biological_process
ENSDARG00000008278	10.28	7.795	4.685	REST corepressor 2 [Source:ZFIN;Acc:ZDB-GENE-040426-1812]	-	GO:0005575//cellular_component;GO:0005622//intracellular;GO:0005623//cell;GO:0005634//nucleus;GO:0043226//organelle	GO:0003674//molecular_function;GO:0003682//chromatin binding;GO:0003677//DNA binding	GO:0008150//biological_process;GO:0009058//biosynthetic process;GO:0034641//cellular nitrogen compound metabolic process
ENSDARG00000008305	12.06	8.32	4.75	-	-	-	-	-
ENSDARG00000008380	33.655	21.505	15.12	bromodomain containing 7 [Source:ZFIN;Acc:ZDB-GENE-040426-2687]	-	-	GO:0030246//carbohydrate binding;GO:0003674//molecular_function	-
ENSDARG00000008388	15.11	14.42	7.32	matrix metallopeptidase 14b (membrane-inserted) [Source:ZFIN;Acc:ZDB-GENE-030901-2]	ko04912//GnRH signaling pathway	GO:0031012//extracellular matrix;GO:0005575//cellular_component	GO:0016787//hydrolase activity;GO:0008233//peptidase activity;GO:0004222//metalloendopeptidase activity;GO:0008237//metallopeptidase activity;GO:0008270//zinc ion binding;GO:0046872//metal ion binding;GO:0005509//calcium ion binding;GO:0003674//molecular_function;GO:0043167//ion binding	GO:0009948//anterior/posterior axis specification;GO:0051216//cartilage development;GO:0060027//convergent extension involved in gastrulation;GO:0060026//convergent extension;GO:0030307//positive regulation of cell growth;GO:0006508//proteolysis;GO:0030010//establishment of cell polarity;GO:0030335//positive regulation of cell migration;GO:0042074//cell migration involved in gastrulation;GO:00081…
ENSDARG00000008398	0.97	1.47	2.48	-	ko04010//MAPK signaling pathway;ko04020//Calcium signaling pathway;ko05010//Alzheimer's disease;ko04270//Vascular smooth muscle contraction;ko04725//Cholinergic synapse;ko04912//GnRH signaling pathway;ko05414//Dilated cardiomyopathy;ko04724//Glutamatergic synapse;ko04260//Cardiac muscle contraction;ko05410//Hypertrophic cardiomyopathy (HCM);ko04720//Long-term potentiation;ko05412//Arrhythmogenic …	GO:0005886//plasma membrane;GO:0005891//voltage-gated calcium channel complex;GO:0016020//membrane;GO:0016021//integral component of membrane;GO:0005575//cellular_component;GO:0005623//cell;GO:0005886//plasma membrane;GO:0043234//protein complex	GO:0005245//voltage-gated calcium channel activity;GO:0005262//calcium channel activity;GO:0005216//ion channel activity;GO:0008331//high voltage-gated calcium channel activity;GO:0005244//voltage-gated ion channel activity;GO:0003674//molecular_function;GO:0022857//transmembrane transporter activity	GO:0003007//heart morphogenesis;GO:0008016//regulation of heart contraction;GO:0070509//calcium ion import;GO:0034765//regulation of ion transmembrane transport;GO:0006816//calcium ion transport;GO:0055085//transmembrane transport;GO:0070588//calcium ion transmembrane transport;GO:0006810//transport;GO:0048701//embryonic cranial skeleton morphogenesis;GO:0006811//ion transport;GO:0008150//biologi…
ENSDARG00000008403	5.365	5.495	1.285	-	-	-	-	-
ENSDARG00000008433	6.26	5.24	31.865	unc-45 homolog B (C. elegans) [Source:ZFIN;Acc:ZDB-GENE-020919-3]	-	GO:0005575//cellular_component;GO:0005622//intracellular;GO:0005623//cell;GO:0005737//cytoplasm;GO:0043226//organelle	GO:0003674//molecular_function;GO:0005515//protein binding;GO:0005488//binding	GO:0008150//biological_process;GO:0048856//anatomical structure development;GO:0030154//cell differentiation;GO:0007010//cytoskeleton organization;GO:0022607//cellular component assembly;GO:0048646//anatomical structure formation involved in morphogenesis
ENSDARG00000008450	3.595	2.86	1.31	-	-	-	-	-
ENSDARG00000008491	32.75	63.67	99.44	retinol dehydrogenase 13 (all-trans/9-cis) [Source:HGNC Symbol;Acc:HGNC:19978]	-	-	GO:0016491//oxidoreductase activity;GO:0003674//molecular_function	GO:0008152//metabolic process;GO:0008150//biological_process
ENSDARG00000008502	92.855	126.81	203.415	-	-	-	-	-
ENSDARG00000008553	4.825	8.865	9.935	zgc:136872 [Source:ZFIN;Acc:ZDB-GENE-060421-5204]	-	GO:0005737//cytoplasm;GO:0005622//intracellular;GO:0005575//cellular_component;GO:0005623//cell;GO:0005737//cytoplasm	GO:0005509//calcium ion binding;GO:0008233//peptidase activity;GO:0004198//calcium-dependent cysteine-type endopeptidase activity;GO:0016787//hydrolase activity;GO:0008234//cysteine-type peptidase activity;GO:0003674//molecular_function;GO:0043167//ion binding	GO:0006508//proteolysis;GO:0008150//biological_process
ENSDARG00000008660	14.475	9.315	6.605	coronin, actin binding protein, 1B [Source:ZFIN;Acc:ZDB-GENE-040123-3]	-	GO:0015629//actin cytoskeleton;GO:0005575//cellular_component;GO:0005622//intracellular;GO:0005623//cell;GO:0005856//cytoskeleton;GO:0043226//organelle	GO:0051015//actin filament binding;GO:0003674//molecular_function;GO:0008092//cytoskeletal protein binding	GO:0030036//actin cytoskeleton organization;GO:0007010//cytoskeleton organization;GO:0008150//biological_process
ENSDARG00000008740	13.41	6.21	19.3	ESF1, nucleolar pre-rRNA processing protein, homolog (S. cerevisiae) [Source:ZFIN;Acc:ZDB-GENE-030131-4917]	-	GO:0005634//nucleus;GO:0005575//cellular_component;GO:0005622//intracellular;GO:0005623//cell;GO:0043226//organelle	-	-
ENSDARG00000008788	4.745	12.765	22.56	-	-	GO:0005634//nucleus;GO:0005737//cytoplasm;GO:0005575//cellular_component;GO:0005622//intracellular;GO:0005623//cell;GO:0005737//cytoplasm;GO:0005634//nucleus;GO:0043226//organelle	GO:0004674//protein serine/threonine kinase activity;GO:0004672//protein kinase activity;GO:0005524//ATP binding;GO:0009931//calcium-dependent protein serine/threonine kinase activity;GO:0016740//transferase activity;GO:0016772//transferase activity, transferring phosphorus-containing groups;GO:0005516//calmodulin binding;GO:0004683//calmodulin-dependent protein kinase activity;GO:0016301//kinase…	GO:0045475//locomotor rhythm;GO:0016310//phosphorylation;GO:0006468//protein phosphorylation;GO:0035556//intracellular signal transduction;GO:0018105//peptidyl-serine phosphorylation;GO:0046777//protein autophosphorylation;GO:0006464//cellular protein modification process;GO:0008150//biological_process;GO:0007165//signal transduction
ENSDARG00000008790	0.395	0.96	2	-	-	-	-	-
ENSDARG00000008803	182.605	128.085	73.68	myristoylated alanine-rich protein kinase C substrate b [Source:ZFIN;Acc:ZDB-GENE-030131-1921]	-	GO:0005575//cellular_component;GO:0005575//cellular_component	GO:0016740//transferase activity;GO:0016301//kinase activity;GO:0005516//calmodulin binding;GO:0003674//molecular_function	GO:0010842//retina layer formation;GO:0003381//epithelial cell morphogenesis involved in gastrulation;GO:0007420//brain development;GO:0035914//skeletal muscle cell differentiation;GO:0007369//gastrulation;GO:0060541//respiratory system development;GO:0060027//convergent extension involved in gastrulation;GO:0016310//phosphorylation;GO:0008150//biological_process;GO:0009790//embryo development;GO…
ENSDARG00000008811	2.18	2.62	0.575	CKLF-like MARVEL transmembrane domain containing 3 [Source:ZFIN;Acc:ZDB-GENE-040801-206]	-	GO:0016021//integral component of membrane;GO:0016020//membrane;GO:0005575//cellular_component	GO:0003674//molecular_function;GO:0003674//molecular_function	GO:0008150//biological_process;GO:0008150//biological_process
ENSDARG00000008859	7.845	11.215	16.66	myosin regulatory light chain interacting protein a [Source:ZFIN;Acc:ZDB-GENE-030131-7831]	-	GO:0005575//cellular_component;GO:0005622//intracellular;GO:0005623//cell;GO:0005856//cytoskeleton;GO:0043226//organelle;GO:0005737//cytoplasm;GO:0005829//cytosol	GO:0003674//molecular_function;GO:0016874//ligase activity;GO:0043167//ion binding	GO:0008150//biological_process;GO:0006464//cellular protein modification process;GO:0009790//embryo development;GO:0048856//anatomical structure development
ENSDARG00000008861	12.06	6.03	3.365	-	-	-	-	-
ENSDARG00000008880	3.975	8.96	6.83	ubiquitin specific peptidase 28 [Source:ZFIN;Acc:ZDB-GENE-041008-142]	-	GO:0005575//cellular_component;GO:0005622//intracellular;GO:0005623//cell;GO:0005634//nucleus;GO:0043226//organelle	GO:0003674//molecular_function;GO:0008233//peptidase activity;GO:0003674//molecular_function;GO:0005515//protein binding	GO:0008150//biological_process;GO:0009056//catabolic process;GO:0006464//cellular protein modification process;GO:0006950//response to stress;GO:0007049//cell cycle;GO:0048856//anatomical structure development;GO:0006511//ubiquitin-dependent protein catabolic process;GO:0008150//biological_process;GO:0009056//catabolic process
ENSDARG00000008886	15.72	9.39	4.69	muscle segment homeobox B [Source:ZFIN;Acc:ZDB-GENE-980526-26]	-	GO:0005575//cellular_component;GO:0005622//intracellular;GO:0005623//cell;GO:0005634//nucleus;GO:0043226//organelle	GO:0003674//molecular_function;GO:0003677//DNA binding	GO:0008150//biological_process;GO:0009790//embryo development;GO:0048646//anatomical structure formation involved in morphogenesis;GO:0048856//anatomical structure development;GO:0006950//response to stress;GO:0040007//growth
ENSDARG00000008936	62.61	31.275	38.3	SEC11 homolog A (S. cerevisiae) [Source:ZFIN;Acc:ZDB-GENE-040718-227]	ko03060//Protein export	GO:0016020//membrane;GO:0016021//integral component of membrane;GO:0005575//cellular_component	GO:0016787//hydrolase activity;GO:0008236//serine-type peptidase activity;GO:0008233//peptidase activity;GO:0003674//molecular_function	GO:0006508//proteolysis;GO:0006465//signal peptide processing;GO:0008150//biological_process;GO:0034641//cellular nitrogen compound metabolic process
ENSDARG00000008948	0.03	0.001	1.315	phospholipase A2, group III [Source:HGNC Symbol;Acc:HGNC:17934]	ko01100//Metabolic pathways;ko04010//MAPK signaling pathway;ko04270//Vascular smooth muscle contraction;ko05145//Toxoplasmosis;ko04912//GnRH signaling pathway;ko04666//Fc gamma R-mediated phagocytosis;ko04724//Glutamatergic synapse;ko04972//Pancreatic secretion;ko04370//VEGF signaling pathway;ko04664//Fc epsilon RI signaling pathway;ko04730//Long-term depression;ko00564//Glycerophospholipid metab…	GO:0005576//extracellular region;GO:0005575//cellular_component	GO:0004623//phospholipase A2 activity;GO:0005509//calcium ion binding;GO:0003674//molecular_function;GO:0043167//ion binding	GO:0006644//phospholipid metabolic process;GO:0016042//lipid catabolic process;GO:0006629//lipid metabolic process;GO:0008150//biological_process;GO:0009056//catabolic process
ENSDARG00000008969	267.41	201.51	129.45	fibrinogen beta chain [Source:ZFIN;Acc:ZDB-GENE-030131-9261]	-	GO:0005577//fibrinogen complex;GO:0005575//cellular_component;GO:0005576//extracellular region;GO:0005615//extracellular space;GO:0043234//protein complex	GO:0005102//receptor binding;GO:0030674//protein binding, bridging;GO:0003674//molecular_function	GO:0072378//blood coagulation, fibrin clot formation;GO:0030168//platelet activation;GO:0051258//protein polymerization;GO:0007165//signal transduction;GO:0008150//biological_process;GO:0006461//protein complex assembly;GO:0022607//cellular component assembly;GO:0065003;GO:0006950//response to stress
ENSDARG00000008976	2.46	2.18	4.85	midasin homolog (yeast) [Source:ZFIN;Acc:ZDB-GENE-041001-138]	ko03008//Ribosome biogenesis in eukaryotes	GO:0005575//cellular_component;GO:0005622//intracellular;GO:0005623//cell;GO:0005634//nucleus;GO:0043226//organelle	GO:0003674//molecular_function;GO:0043167//ion binding	-
ENSDARG00000008982	40.485	38.335	13.66	calsequestrin 2 [Source:ZFIN;Acc:ZDB-GENE-010724-12]	-	-	GO:0005509//calcium ion binding;GO:0003674//molecular_function;GO:0043167//ion binding	-
ENSDARG00000009001	65.72	32.505	38.97	protein disulfide isomerase family A, member 6 [Source:ZFIN;Acc:ZDB-GENE-030131-879]	ko04141//Protein processing in endoplasmic reticulum	GO:0005783//endoplasmic reticulum;GO:0005575//cellular_component;GO:0005622//intracellular;GO:0005623//cell;GO:0005737//cytoplasm;GO:0005783//endoplasmic reticulum;GO:0043226//organelle	GO:0003756//protein disulfide isomerase activity;GO:0016853//isomerase activity;GO:0003674//molecular_function	GO:0034976//response to endoplasmic reticulum stress;GO:0006457//protein folding;GO:0045454//cell redox homeostasis;GO:0043277//apoptotic cell clearance;GO:0006810//transport;GO:0008150//biological_process;GO:0016192//vesicle-mediated transport;GO:0042592//homeostatic process;GO:0006457//protein folding;GO:0006950//response to stress
ENSDARG00000009014	24.855	22.43	8.745	collagen, type XI, alpha 1b [Source:ZFIN;Acc:ZDB-GENE-070912-607]	-	GO:0005581//collagen trimer;GO:0005575//cellular_component;GO:0043234//protein complex	GO:0005201//extracellular matrix structural constituent;GO:0003674//molecular_function;GO:0005198//structural molecule activity	-
ENSDARG00000009087	0.68	2.025	12.33	-	ko05152//Tuberculosis;ko04612//Antigen processing and presentation	GO:0016020//membrane;GO:0005575//cellular_component	GO:0042289//MHC class II protein binding;GO:0003674//molecular_function	GO:0048884//neuromast development;GO:0006886//intracellular protein transport;GO:0048839//inner ear development;GO:0019882//antigen processing and presentation;GO:0006955//immune response;GO:0002376//immune system process;GO:0008150//biological_process;GO:0048856//anatomical structure development;GO:0006810//transport
ENSDARG00000009113	5.59	2.97	2.63	phosphatidylinositol glycan anchor biosynthesis, class C [Source:ZFIN;Acc:ZDB-GENE-030131-2714]	ko01100//Metabolic pathways;ko00563//Glycosylphosphatidylinositol(GPI)-anchor biosynthesis	GO:0016021//integral component of membrane;GO:0005575//cellular_component	GO:0017176//phosphatidylinositol N-acetylglucosaminyltransferase activity;GO:0003674//molecular_function;GO:0016757//transferase activity, transferring glycosyl groups	GO:0006506//GPI anchor biosynthetic process;GO:0006464//cellular protein modification process;GO:0006629//lipid metabolic process;GO:0008150//biological_process;GO:0009058//biosynthetic process
ENSDARG00000009134	15.48	12.24	5.93	H2.0-like homeo box 1 (Drosophila) [Source:ZFIN;Acc:ZDB-GENE-030131-5304]	-	GO:0005634//nucleus;GO:0005575//cellular_component;GO:0005622//intracellular;GO:0005623//cell;GO:0043226//organelle	GO:0003677//DNA binding;GO:0043565//sequence-specific DNA binding;GO:0003674//molecular_function	GO:0002040//sprouting angiogenesis;GO:0006355//regulation of transcription, DNA-templated;GO:0008150//biological_process;GO:0048646//anatomical structure formation involved in morphogenesis;GO:0048856//anatomical structure development
ENSDARG00000009153	0.785	22.965	54.115	phospholipase A2, group IB (pancreas) [Source:ZFIN;Acc:ZDB-GENE-070117-1]	ko01100//Metabolic pathways;ko04010//MAPK signaling pathway;ko04270//Vascular smooth muscle contraction;ko05145//Toxoplasmosis;ko04912//GnRH signaling pathway;ko04666//Fc gamma R-mediated phagocytosis;ko04724//Glutamatergic synapse;ko04972//Pancreatic secretion;ko04370//VEGF signaling pathway;ko04664//Fc epsilon RI signaling pathway;ko04730//Long-term depression;ko00564//Glycerophospholipid metab…	GO:0005575//cellular_component;GO:0005576//extracellular region	GO:0003674//molecular_function;GO:0043167//ion binding	GO:0006629//lipid metabolic process;GO:0008150//biological_process;GO:0009056//catabolic process
ENSDARG00000009161	0.04	0.175	0.555	-	-	-	-	-
ENSDARG00000009262	2.06	2.645	4.265	fatty acyl CoA reductase 2 [Source:HGNC Symbol;Acc:HGNC:25531]	ko04146//Peroxisome	-	GO:0080019//fatty-acyl-CoA reductase (alcohol-forming) activity;GO:0003674//molecular_function;GO:0016491//oxidoreductase activity	-
ENSDARG00000009273	13.525	10.135	5.55	protein phosphatase, Mg2+/Mn2+ dependent, 1Da [Source:ZFIN;Acc:ZDB-GENE-040426-815]	ko04115//p53 signaling pathway	-	GO:0004721//phosphoprotein phosphatase activity;GO:0016787//hydrolase activity;GO:0003824//catalytic activity;GO:0046872//metal ion binding;GO:0004722//protein serine/threonine phosphatase activity;GO:0003674//molecular_function;GO:0016791//phosphatase activity;GO:0043167//ion binding	GO:0006470//protein dephosphorylation;GO:0006464//cellular protein modification process;GO:0008150//biological_process
ENSDARG00000009386	9.97	3.49	2.735	-	-	-	-	-
ENSDARG00000009401	41.23	28.295	14.15	versican b [Source:ZFIN;Acc:ZDB-GENE-030131-2185]	-	GO:0005578//proteinaceous extracellular matrix;GO:0005575//cellular_component;GO:0005576//extracellular region;GO:0005578//proteinaceous extracellular matrix	GO:0005509//calcium ion binding;GO:0005540//hyaluronic acid binding;GO:0005201//extracellular matrix structural constituent;GO:0003674//molecular_function;GO:0005198//structural molecule activity;GO:0043167//ion binding	GO:0001957//intramembranous ossification;GO:0007155//cell adhesion;GO:0007417//central nervous system development;GO:0001501//skeletal system development;GO:0008150//biological_process;GO:0048856//anatomical structure development
ENSDARG00000009438	17.45	15.685	7.655	-	-	GO:0005634//nucleus;GO:0005575//cellular_component;GO:0005622//intracellular;GO:0005623//cell;GO:0005634//nucleus;GO:0043226//organelle	GO:0000978//RNA polymerase II core promoter proximal region sequence-specific DNA binding;GO:0003677//DNA binding;GO:0003705//RNA polymerase II distal enhancer sequence-specific DNA binding transcription factor activity;GO:0046983//protein dimerization activity;GO:0003674//molecular_function;GO:0001071//nucleic acid binding transcription factor activity	GO:0014823//response to activity;GO:0007519//skeletal muscle tissue development;GO:0007517//muscle organ development;GO:0045663//positive regulation of myoblast differentiation;GO:0048743//positive regulation of skeletal muscle fiber development;GO:0035914//skeletal muscle cell differentiation;GO:0006355//regulation of transcription, DNA-templated;GO:0008150//biological_process;GO:0030154//cell d…
ENSDARG00000009443	14.19	495.22	1098.09	zgc:92137 [Source:ZFIN;Acc:ZDB-GENE-040801-179]	-	-	GO:0016787//hydrolase activity;GO:0043169//cation binding;GO:0003824//catalytic activity;GO:0004556//alpha-amylase activity;GO:0016798//hydrolase activity, acting on glycosyl bonds;GO:0003674//molecular_function;GO:0043167//ion binding	GO:0008152//metabolic process;GO:0005975//carbohydrate metabolic process;GO:0008150//biological_process
ENSDARG00000009493	1.91	1.865	3.965	mitogen-activated protein kinase kinase kinase 13 [Source:HGNC Symbol;Acc:HGNC:6852]	ko04010//MAPK signaling pathway	-	GO:0003674//molecular_function;GO:0016301//kinase activity;GO:0004871//signal transducer activity;GO:0043167//ion binding;GO:0003674//molecular_function;GO:0016301//kinase activity;GO:0004871//signal transducer activity;GO:0043167//ion binding	GO:0008150//biological_process;GO:0006464//cellular protein modification process;GO:0008150//biological_process;GO:0006464//cellular protein modification process
ENSDARG00000009594	51.04	12.875	89.54	nuclear receptor subfamily 1, group D, member 2b [Source:ZFIN;Acc:ZDB-GENE-990415-244]	-	GO:0005634//nucleus;GO:0005575//cellular_component;GO:0005622//intracellular;GO:0005623//cell;GO:0043226//organelle	GO:0003677//DNA binding;GO:0043565//sequence-specific DNA binding;GO:0003700//sequence-specific DNA binding transcription factor activity;GO:0003707//steroid hormone receptor activity;GO:0008270//zinc ion binding;GO:0046872//metal ion binding;GO:0003674//molecular_function;GO:0043167//ion binding;GO:0004871//signal transducer activity;GO:0001071//nucleic acid binding transcription factor activity	GO:0006355//regulation of transcription, DNA-templated;GO:0006351//transcription, DNA-templated;GO:0043401//steroid hormone mediated signaling pathway;GO:0007165//signal transduction;GO:0008150//biological_process;GO:0009058//biosynthetic process;GO:0034641//cellular nitrogen compound metabolic process
ENSDARG00000009612	1.42	18.58	57.62	-	ko00520//Amino sugar and nucleotide sugar metabolism	GO:0005576//extracellular region;GO:0005575//cellular_component;GO:0005576//extracellular region	GO:0004553//hydrolase activity, hydrolyzing O-glycosyl compounds;GO:0008061//chitin binding;GO:0004568//chitinase activity;GO:0003674//molecular_function;GO:0016798//hydrolase activity, acting on glycosyl bonds	GO:0005975//carbohydrate metabolic process;GO:0006030//chitin metabolic process;GO:0006032//chitin catabolic process;GO:0008150//biological_process;GO:0009056//catabolic process
ENSDARG00000009637	225.385	40.6	108.02	zgc:73075 [Source:ZFIN;Acc:ZDB-GENE-040426-1661]	-	GO:0005575//cellular_component;GO:0005575//cellular_component	GO:0005509//calcium ion binding;GO:0046872//metal ion binding;GO:0003674//molecular_function;GO:0043167//ion binding	-
ENSDARG00000009673	0.28	0.49	1.255	-	-	-	-	-
ENSDARG00000009702	0.475	1.515	2.455	-	-	-	-	-
ENSDARG00000009738	0.52	1.46	1.495	calcium channel, voltage-dependent, beta 4a subunit [Source:ZFIN;Acc:ZDB-GENE-080320-2]	ko04010//MAPK signaling pathway;ko05414//Dilated cardiomyopathy;ko04260//Cardiac muscle contraction;ko05410//Hypertrophic cardiomyopathy (HCM);ko05412//Arrhythmogenic right ventricular cardiomyopathy (ARVC)	GO:0005891//voltage-gated calcium channel complex;GO:0005575//cellular_component;GO:0005623//cell;GO:0005886//plasma membrane;GO:0043234//protein complex	GO:0008331//high voltage-gated calcium channel activity;GO:0005245//voltage-gated calcium channel activity;GO:0003674//molecular_function;GO:0022857//transmembrane transporter activity	GO:0070588//calcium ion transmembrane transport;GO:0055113//epiboly involved in gastrulation with mouth forming second;GO:0007268//synaptic transmission;GO:0007528//neuromuscular junction development;GO:0008150//biological_process;GO:0007267//cell-cell signaling;GO:0009790//embryo development;GO:0048856//anatomical structure development;GO:0006810//transport;GO:0055085//transmembrane transport
ENSDARG00000009783	9.13	13.095	6.54	disrupted in renal carcinoma 2 [Source:ZFIN;Acc:ZDB-GENE-040912-167]	-	GO:0016021//integral component of membrane;GO:0005575//cellular_component	GO:0003674//molecular_function;GO:0003674//molecular_function	GO:0055085//transmembrane transport;GO:0006810//transport;GO:0008150//biological_process
ENSDARG00000009822	8.25	6.945	4	-	-	-	GO:0003674//molecular_function;GO:0003677//DNA binding	GO:0008150//biological_process;GO:0000902//cell morphogenesis;GO:0030154//cell differentiation;GO:0048856//anatomical structure development;GO:0009058//biosynthetic process;GO:0034641//cellular nitrogen compound metabolic process
ENSDARG00000009823	20.425	14.29	10.075	POU class 3 homeobox 1 [Source:ZFIN;Acc:ZDB-GENE-980526-372]	-	GO:0005575//cellular_component;GO:0005622//intracellular;GO:0005623//cell;GO:0005634//nucleus;GO:0043226//organelle	GO:0001071//nucleic acid binding transcription factor activity;GO:0003674//molecular_function;GO:0003677//DNA binding	GO:0008150//biological_process;GO:0048856//anatomical structure development;GO:0009058//biosynthetic process;GO:0034641//cellular nitrogen compound metabolic process;GO:0030154//cell differentiation
ENSDARG00000009825	8.025	7.1	2.77	matrix metallopeptidase 23bb [Source:ZFIN;Acc:ZDB-GENE-050417-448]	-	GO:0031012//extracellular matrix;GO:0005575//cellular_component	GO:0016787//hydrolase activity;GO:0008233//peptidase activity;GO:0004222//metalloendopeptidase activity;GO:0008270//zinc ion binding;GO:0046872//metal ion binding;GO:0008237//metallopeptidase activity;GO:0003674//molecular_function;GO:0043167//ion binding	GO:0001889//liver development;GO:0006508//proteolysis;GO:0008150//biological_process;GO:0048856//anatomical structure development
ENSDARG00000009844	6.705	32.24	34.015	dual specificity phosphatase 23a [Source:ZFIN;Acc:ZDB-GENE-030131-2554]	-	-	GO:0016791//phosphatase activity;GO:0016787//hydrolase activity;GO:0008138//protein tyrosine/serine/threonine phosphatase activity;GO:0004725//protein tyrosine phosphatase activity;GO:0003674//molecular_function	GO:0006470//protein dephosphorylation;GO:0016311//dephosphorylation;GO:0008150//biological_process;GO:0006464//cellular protein modification process
ENSDARG00000009862	13.93	9.935	6.3	mRNA decapping enzyme [Source:ZFIN;Acc:ZDB-GENE-040311-1]	ko03018//RNA degradation	-	GO:0016787//hydrolase activity;GO:0003824//catalytic activity;GO:0003674//molecular_function	GO:0000290//deadenylation-dependent decapping of nuclear-transcribed mRNA;GO:0008150//biological_process;GO:0009056//catabolic process;GO:0034641//cellular nitrogen compound metabolic process;GO:0034655
ENSDARG00000009871	78.1	40.525	32.775	small nuclear ribonucleoprotein polypeptide C [Source:ZFIN;Acc:ZDB-GENE-020419-26]	ko03040//Spliceosome	GO:0005575//cellular_component;GO:0005622//intracellular;GO:0005623//cell;GO:0005634//nucleus;GO:0043226//organelle	GO:0003674//molecular_function;GO:0043167//ion binding;GO:0003723//RNA binding;GO:0003729//mRNA binding	GO:0006397//mRNA processing;GO:0008150//biological_process;GO:0022607//cellular component assembly;GO:0022618//ribonucleoprotein complex assembly;GO:0034641//cellular nitrogen compound metabolic process;GO:0065003
ENSDARG00000010023	10.895	4.455	17.87	-	-	-	-	-
ENSDARG00000010130	9.055	40.615	42.28	-	-	-	-	-
ENSDARG00000010146	0.625	2.37	13.2	carboxypeptidase A2 (pancreatic) [Source:ZFIN;Acc:ZDB-GENE-040801-182]	-	GO:0005575//cellular_component;GO:0005575//cellular_component	GO:0004181//metallocarboxypeptidase activity;GO:0008270//zinc ion binding;GO:0016787//hydrolase activity;GO:0008233//peptidase activity;GO:0004180//carboxypeptidase activity;GO:0003674//molecular_function;GO:0043167//ion binding	GO:0006508//proteolysis;GO:0008150//biological_process
ENSDARG00000010154	9.625	8.835	4.415	-	-	-	-	-
ENSDARG00000010186	1.255	0.855	2	-	-	GO:0016459//myosin complex;GO:0005575//cellular_component;GO:0005622//intracellular;GO:0005623//cell;GO:0005856//cytoskeleton;GO:0043226//organelle;GO:0043234//protein complex	GO:0005524//ATP binding;GO:0004672//protein kinase activity;GO:0016772//transferase activity, transferring phosphorus-containing groups;GO:0000166//nucleotide binding;GO:0003774//motor activity;GO:0003674//molecular_function;GO:0016301//kinase activity;GO:0043167//ion binding	GO:0006468//protein phosphorylation;GO:0006464//cellular protein modification process;GO:0008150//biological_process
ENSDARG00000010231	1.395	1.36	3.51	protein phosphatase, Mg2+/Mn2+ dependent, 1Na (putative) [Source:ZFIN;Acc:ZDB-GENE-040426-2731]	ko04010//MAPK signaling pathway	-	GO:0016787//hydrolase activity;GO:0000287//magnesium ion binding;GO:0046872//metal ion binding;GO:0030145//manganese ion binding;GO:0004721//phosphoprotein phosphatase activity;GO:0003824//catalytic activity;GO:0004722//protein serine/threonine phosphatase activity;GO:0003674//molecular_function;GO:0016791//phosphatase activity;GO:0043167//ion binding	GO:0006470//protein dephosphorylation;GO:0006464//cellular protein modification process;GO:0008150//biological_process
ENSDARG00000010252	0.225	0.965	1.26	-	-	-	-	-
ENSDARG00000010270	2.365	1.66	0.97	FEZ family zinc finger 1 [Source:ZFIN;Acc:ZDB-GENE-060929-970]	-	GO:0005575//cellular_component;GO:0005622//intracellular;GO:0005623//cell;GO:0005634//nucleus;GO:0043226//organelle	GO:0003674//molecular_function;GO:0043167//ion binding;GO:0003677//DNA binding	GO:0008150//biological_process;GO:0048856//anatomical structure development;GO:0009058//biosynthetic process;GO:0034641//cellular nitrogen compound metabolic process;GO:0030154//cell differentiation
ENSDARG00000010276	1.105	2.16	2.92	prostaglandin-endoperoxide synthase 2b [Source:ZFIN;Acc:ZDB-GENE-041014-323]	ko01100//Metabolic pathways;ko05200//Pathways in cancer;ko05222//Small cell lung cancer;ko04370//VEGF signaling pathway;ko05140//Leishmaniasis;ko00590//Arachidonic acid metabolism	-	GO:0004601//peroxidase activity;GO:0020037//heme binding;GO:0004666//prostaglandin-endoperoxide synthase activity;GO:0003674//molecular_function;GO:0016491//oxidoreductase activity	GO:0019371//cyclooxygenase pathway;GO:0055114//oxidation-reduction process;GO:0006954//inflammatory response;GO:0001516//prostaglandin biosynthetic process;GO:0071407//cellular response to organic cyclic compound;GO:0006979//response to oxidative stress;GO:0008217//regulation of blood pressure;GO:0003013;GO:0008150//biological_process;GO:0006950//response to stress;GO:0006629//lipid metabolic pro…
ENSDARG00000010318	37.085	24.03	8.735	sushi-repeat containing protein, X-linked [Source:ZFIN;Acc:ZDB-GENE-050327-43]	-	-	GO:0003674//molecular_function;GO:0003674//molecular_function	GO:0008150//biological_process;GO:0008150//biological_process
ENSDARG00000010347	3.38	2.905	1.27	-	-	-	-	-
ENSDARG00000010385	8.295	4.39	3.02	septin 4a [Source:ZFIN;Acc:ZDB-GENE-051120-87]	-	-	GO:0005525//GTP binding;GO:0000166//nucleotide binding;GO:0003674//molecular_function;GO:0043167//ion binding	-
ENSDARG00000010420	13.385	60.08	28.925	N-myc downstream regulated 1b [Source:ZFIN;Acc:ZDB-GENE-040426-1648]	-	GO:0005737//cytoplasm;GO:0005575//cellular_component;GO:0005622//intracellular;GO:0005623//cell;GO:0005737//cytoplasm	-	GO:0007165//signal transduction;GO:0007165//signal transduction;GO:0008150//biological_process
ENSDARG00000010432	24.81	16.205	10.545	ELL associated factor 2 [Source:ZFIN;Acc:ZDB-GENE-040625-179]	-	GO:0032783//ELL-EAF complex;GO:0005575//cellular_component;GO:0005622//intracellular;GO:0005623//cell;GO:0005634//nucleus;GO:0005654//nucleoplasm;GO:0043226//organelle;GO:0043234//protein complex	GO:0070016//armadillo repeat domain binding;GO:0008013//beta-catenin binding;GO:0005515//protein binding;GO:0003674//molecular_function	GO:0007507//heart development;GO:0060028//convergent extension involved in axis elongation;GO:0031016//pancreas development;GO:0060029//convergent extension involved in organogenesis;GO:0014812//muscle cell migration;GO:0006355//regulation of transcription, DNA-templated;GO:0030111//regulation of Wnt signaling pathway;GO:0042074//cell migration involved in gastrulation;GO:0008150//biological_proc…
ENSDARG00000010478	23.255	11.55	110.955	heat shock protein 90, alpha (cytosolic), class A member 1, tandem duplicate 1 [Source:ZFIN;Acc:ZDB-GENE-990415-94]	ko05200//Pathways in cancer;ko04141//Protein processing in endoplasmic reticulum;ko05215//Prostate cancer;ko04914//Progesterone-mediated oocyte maturation;ko04621//NOD-like receptor signaling pathway;ko04612//Antigen processing and presentation	GO:0005575//cellular_component;GO:0005622//intracellular;GO:0005623//cell;GO:0005737//cytoplasm;GO:0043226//organelle;GO:0016023//cytoplasmic membrane-bounded vesicle;GO:0005575//cellular_component;GO:0005622//intracellular;GO:0005623//cell;GO:0005737//cytoplasm;GO:0043226//organelle;GO:0016023//cytoplasmic membrane-bounded vesicle	GO:0003674//molecular_function;GO:0043167//ion binding;GO:0030234//enzyme regulator activity;GO:0051082//unfolded protein binding;GO:0003674//molecular_function;GO:0043167//ion binding;GO:0030234//enzyme regulator activity;GO:0051082//unfolded protein binding	GO:0007010//cytoskeleton organization;GO:0008150//biological_process;GO:0022607//cellular component assembly;GO:0030154//cell differentiation;GO:0048646//anatomical structure formation involved in morphogenesis;GO:0048856//anatomical structure development;GO:0006461//protein complex assembly;GO:0065003;GO:0006950//response to stress;GO:0006457//protein folding;GO:0007010//cytoskeleton organizatio…
ENSDARG00000010482	2.315	1.48	1.145	-	-	GO:0005575//cellular_component;GO:0005575//cellular_component	GO:0005044//scavenger receptor activity;GO:0030247//polysaccharide binding;GO:0003674//molecular_function	GO:0006955//immune response;GO:0002376//immune system process;GO:0008150//biological_process
ENSDARG00000010487	35	16.49	12.755	SUMO1 activating enzyme subunit 1 [Source:ZFIN;Acc:ZDB-GENE-040625-21]	ko04120//Ubiquitin mediated proteolysis	GO:0005575//cellular_component;GO:0005622//intracellular;GO:0005623//cell;GO:0005634//nucleus;GO:0043226//organelle;GO:0005737//cytoplasm;GO:0005829//cytosol	GO:0003674//molecular_function;GO:0016874//ligase activity	GO:0008150//biological_process;GO:0042592//homeostatic process;GO:0006464//cellular protein modification process;GO:0002376//immune system process;GO:0048856//anatomical structure development
ENSDARG00000010519	5.91	1.34	27.145	period circadian clock 3 [Source:ZFIN;Acc:ZDB-GENE-000804-1]	ko04710//Circadian rhythm - mammal;ko04711//Circadian rhythm - fly	-	GO:0004871//signal transducer activity;GO:0003674//molecular_function	GO:0009648//photoperiodism;GO:0032922//circadian regulation of gene expression;GO:0007165//signal transduction;GO:0008150//biological_process
ENSDARG00000010555	8.905	6.175	3.755	-	ko01100//Metabolic pathways;ko00010//Glycolysis / Gluconeogenesis;ko00620//Pyruvate metabolism;ko00020//Citrate cycle (TCA cycle);ko00650//Butanoate metabolism;ko00290//Valine, leucine and isoleucine biosynthesis	GO:0043231//intracellular membrane-bounded organelle;GO:0005575//cellular_component;GO:0005622//intracellular;GO:0005623//cell;GO:0043226//organelle	GO:0016491//oxidoreductase activity;GO:0016624//oxidoreductase activity, acting on the aldehyde or oxo group of donors, disulfide as acceptor;GO:0004739//pyruvate dehydrogenase (acetyl-transferring) activity;GO:0003674//molecular_function	GO:0006096//glycolytic process;GO:0055114//oxidation-reduction process;GO:0008152//metabolic process;GO:0008150//biological_process;GO:0005975//carbohydrate metabolic process;GO:0006091//generation of precursor metabolites and energy;GO:0009056//catabolic process;GO:0034641//cellular nitrogen compound metabolic process;GO:0034655;GO:0044281//small molecule metabolic process;GO:0051186//cofactor m…
ENSDARG00000010571	8.425	5.185	2.335	-	-	-	-	-
ENSDARG00000010602	2.915	2.73	1.275	-	-	-	-	-
ENSDARG00000010619	0.905	0.34	0.25	thymocyte selection associated [Source:ZFIN;Acc:ZDB-GENE-041008-160]	-	GO:0005575//cellular_component;GO:0005622//intracellular;GO:0005623//cell;GO:0005634//nucleus;GO:0043226//organelle;GO:0005737//cytoplasm	GO:0003674//molecular_function	GO:0002376//immune system process;GO:0008150//biological_process;GO:0007155//cell adhesion;GO:0030154//cell differentiation;GO:0048856//anatomical structure development;GO:0007165//signal transduction
ENSDARG00000010630	11.055	6.455	4.015	-	-	-	-	-
ENSDARG00000010658	13.865	26.155	32.47	insulin induced gene 1 [Source:ZFIN;Acc:ZDB-GENE-030131-6121]	-	GO:0005575//cellular_component;GO:0005622//intracellular;GO:0005623//cell;GO:0005737//cytoplasm;GO:0005783//endoplasmic reticulum;GO:0043226//organelle	-	GO:0006629//lipid metabolic process;GO:0008150//biological_process;GO:0044281//small molecule metabolic process
ENSDARG00000010680	166.86	77.165	21.74	guanine nucleotide binding protein (G protein), gamma transducing activity polypeptide 2a [Source:ZFIN;Acc:ZDB-GENE-030131-7595]	-	GO:0005886//plasma membrane;GO:0005834//heterotrimeric G-protein complex;GO:0016020//membrane;GO:0005575//cellular_component;GO:0005622//intracellular;GO:0005623//cell;GO:0043234//protein complex	GO:0004871//signal transducer activity;GO:0003674//molecular_function	GO:0007186//G-protein coupled receptor signaling pathway;GO:0007165//signal transduction;GO:0008150//biological_process
ENSDARG00000010710	30.315	18.795	14.8	-	-	-	-	-
ENSDARG00000010717	336.345	159.075	204.76	-	-	-	-	-
ENSDARG00000010729	0.001	0.1	0.225	-	-	-	-	-
ENSDARG00000010758	17.12	11.315	7.55	-	-	GO:0005622//intracellular;GO:0005737//cytoplasm;GO:0005575//cellular_component;GO:0005623//cell;GO:0005737//cytoplasm	GO:0004198//calcium-dependent cysteine-type endopeptidase activity;GO:0008233//peptidase activity;GO:0016787//hydrolase activity;GO:0008234//cysteine-type peptidase activity;GO:0005509//calcium ion binding;GO:0003674//molecular_function;GO:0043167//ion binding	GO:0006508//proteolysis;GO:0008150//biological_process
ENSDARG00000010764	1.195	5.06	8.345	flj13639 [Source:ZFIN;Acc:ZDB-GENE-030131-8104]	-	-	GO:0016491//oxidoreductase activity;GO:0003674//molecular_function	GO:0008152//metabolic process;GO:0008150//biological_process
ENSDARG00000010770	20.125	18.11	9.255	-	-	GO:0005575//cellular_component;GO:0005622//intracellular;GO:0005623//cell;GO:0043234//protein complex;GO:0005634//nucleus;GO:0043226//organelle	GO:0003674//molecular_function;GO:0003677//DNA binding;GO:0001071//nucleic acid binding transcription factor activity	GO:0008150//biological_process;GO:0009058//biosynthetic process;GO:0034641//cellular nitrogen compound metabolic process;GO:0030154//cell differentiation
ENSDARG00000010792	11.475	12.995	4.97	cell division cycle 25B [Source:ZFIN;Acc:ZDB-GENE-000330-5]	ko04010//MAPK signaling pathway;ko04110//Cell cycle;ko04914//Progesterone-mediated oocyte maturation	GO:0005622//intracellular;GO:0005575//cellular_component;GO:0005623//cell	GO:0004725//protein tyrosine phosphatase activity;GO:0003674//molecular_function;GO:0016791//phosphatase activity	GO:0010389//regulation of G2/M transition of mitotic cell cycle;GO:0006470//protein dephosphorylation;GO:0009794//regulation of mitotic cell cycle, embryonic;GO:0008150//biological_process;GO:0006464//cellular protein modification process
ENSDARG00000010823	24.9	16.36	10.985	-	-	-	-	-
ENSDARG00000010878	25.475	14.695	7.79	cyclin-dependent kinase inhibitor 1Ca [Source:ZFIN;Acc:ZDB-GENE-040123-1]	ko04110//Cell cycle	GO:0005634//nucleus;GO:0005575//cellular_component;GO:0005622//intracellular;GO:0005623//cell;GO:0043226//organelle	GO:0016740//transferase activity;GO:0016301//kinase activity;GO:0004861//cyclin-dependent protein serine/threonine kinase inhibitor activity;GO:0003674//molecular_function;GO:0030234//enzyme regulator activity	GO:0001708//cell fate specification;GO:0007346//regulation of mitotic cell cycle;GO:0010001//glial cell differentiation;GO:0045930//negative regulation of mitotic cell cycle;GO:0016310//phosphorylation;GO:0007050//cell cycle arrest;GO:0007049//cell cycle;GO:0008150//biological_process;GO:0030154//cell differentiation;GO:0048856//anatomical structure development
ENSDARG00000010925	2.895	3.995	1.57	-	-	-	-	-
ENSDARG00000010933	4.01	1.565	0.92	-	-	-	-	-
ENSDARG00000010934	1.07	1.12	2.345	-	-	-	-	-
ENSDARG00000010936	10.03	40.89	88.32	-	-	GO:0016021//integral component of membrane;GO:0005575//cellular_component	GO:0042626//ATPase activity, coupled to transmembrane movement of substances;GO:0000166//nucleotide binding;GO:0005524//ATP binding;GO:0015562//efflux transmembrane transporter activity;GO:0019534//toxin transporter activity;GO:0016887//ATPase activity;GO:0015462//protein-transmembrane transporting ATPase activity;GO:0003674//molecular_function;GO:0008565//protein transporter activity;GO:0022857/…	GO:0055085//transmembrane transport;GO:0009636//response to toxic substance;GO:0006810//transport;GO:0008150//biological_process
ENSDARG00000010948	24.055	24.605	4.29	-	-	-	-	-
ENSDARG00000010962	43.205	17.19	24.4	FK506 binding protein 7 [Source:ZFIN;Acc:ZDB-GENE-030616-182]	-	GO:0005789//endoplasmic reticulum membrane;GO:0005575//cellular_component;GO:0005622//intracellular;GO:0005623//cell;GO:0005737//cytoplasm;GO:0005783//endoplasmic reticulum;GO:0043226//organelle	GO:0003755//peptidyl-prolyl cis-trans isomerase activity;GO:0005528//FK506 binding;GO:0005509//calcium ion binding;GO:0003674//molecular_function;GO:0043167//ion binding;GO:0016853//isomerase activity	GO:0061077//chaperone-mediated protein folding;GO:0006457//protein folding;GO:0008150//biological_process
ENSDARG00000011020	157.145	79.06	73.995	heterogeneous nuclear ribonucleoprotein A1a [Source:ZFIN;Acc:ZDB-GENE-040426-1546]	ko03040//Spliceosome	GO:0005575//cellular_component;GO:0005575//cellular_component	GO:0003676//nucleic acid binding;GO:0000166//nucleotide binding;GO:0003674//molecular_function	-
ENSDARG00000011083	0.035	0.075	0.46	si:dkey-42l23.2 [Source:ZFIN;Acc:ZDB-GENE-131121-582]	-	GO:0005575//cellular_component;GO:0005623//cell;GO:0005886//plasma membrane	GO:0003674//molecular_function;GO:0004871//signal transducer activity	GO:0007165//signal transduction;GO:0008150//biological_process;GO:0007267//cell-cell signaling
ENSDARG00000011094	26.65	25.5	5.365	cyclin A2 [Source:ZFIN;Acc:ZDB-GENE-020418-1]	ko05200//Pathways in cancer;ko04110//Cell cycle;ko04914//Progesterone-mediated oocyte maturation;ko05221//Acute myeloid leukemia	GO:0005634//nucleus;GO:0005575//cellular_component;GO:0005622//intracellular;GO:0005623//cell;GO:0043226//organelle	GO:0019901//protein kinase binding;GO:0003674//molecular_function;GO:0019899//enzyme binding	GO:0060041//retina development in camera-type eye;GO:0000079//regulation of cyclin-dependent protein serine/threonine kinase activity;GO:0010389//regulation of G2/M transition of mitotic cell cycle;GO:0008150//biological_process;GO:0048856//anatomical structure development
ENSDARG00000011235	18.305	13.18	8.975	-	-	GO:0005575//cellular_component;GO:0005622//intracellular;GO:0005623//cell;GO:0005634//nucleus;GO:0043226//organelle;GO:0005575//cellular_component;GO:0005622//intracellular;GO:0005623//cell;GO:0005634//nucleus;GO:0043226//organelle	GO:0001071//nucleic acid binding transcription factor activity;GO:0003674//molecular_function;GO:0003677//DNA binding;GO:0001071//nucleic acid binding transcription factor activity;GO:0003674//molecular_function;GO:0003677//DNA binding	GO:0008150//biological_process;GO:0009790//embryo development;GO:0048856//anatomical structure development;GO:0008150//biological_process;GO:0009790//embryo development;GO:0048856//anatomical structure development
ENSDARG00000011259	1.705	1.785	3.77	transient receptor potential cation channel, subfamily M, member 1a [Source:ZFIN;Acc:ZDB-GENE-070112-1372]	-	GO:0016021//integral component of membrane;GO:0016020//membrane;GO:0005575//cellular_component	GO:0005261//cation channel activity;GO:0005216//ion channel activity;GO:0003674//molecular_function;GO:0022857//transmembrane transporter activity	GO:0006810//transport;GO:0034220//ion transmembrane transport;GO:0006811//ion transport;GO:0055085//transmembrane transport;GO:0007216//G-protein coupled glutamate receptor signaling pathway;GO:0071482//cellular response to light stimulus;GO:0008150//biological_process;GO:0007165//signal transduction
ENSDARG00000011262	2.725	2.43	0.81	TRAF-interacting protein [Source:ZFIN;Acc:ZDB-GENE-040801-30]	-	-	GO:0008270//zinc ion binding;GO:0046872//metal ion binding;GO:0003674//molecular_function;GO:0043167//ion binding	-
ENSDARG00000011326	1.8	0.8	0.395	ankyrin repeat domain 45 [Source:ZFIN;Acc:ZDB-GENE-050522-311]	-	GO:0005575//cellular_component;GO:0005575//cellular_component	GO:0003674//molecular_function;GO:0003674//molecular_function;GO:0005515//protein binding	GO:0008150//biological_process;GO:0008150//biological_process
ENSDARG00000011334	15.42	5.325	21.655	neurocalcin delta b [Source:ZFIN;Acc:ZDB-GENE-040808-37]	-	GO:0005575//cellular_component;GO:0005575//cellular_component;GO:0005575//cellular_component;GO:0005575//cellular_component	GO:0003674//molecular_function;GO:0043167//ion binding;GO:0003674//molecular_function;GO:0043167//ion binding;GO:0003674//molecular_function;GO:0043167//ion binding;GO:0003674//molecular_function;GO:0043167//ion binding	-
ENSDARG00000011373	3.75	5.725	12.05	-	ko04010//MAPK signaling pathway;ko04910//Insulin signaling pathway	GO:0005737//cytoplasm;GO:0005634//nucleus;GO:0005575//cellular_component;GO:0005622//intracellular;GO:0005623//cell;GO:0005634//nucleus;GO:0043226//organelle;GO:0005737//cytoplasm	GO:0005524//ATP binding;GO:0004672//protein kinase activity;GO:0005516//calmodulin binding;GO:0016740//transferase activity;GO:0009931//calcium-dependent protein serine/threonine kinase activity;GO:0016301//kinase activity;GO:0000166//nucleotide binding;GO:0016772//transferase activity, transferring phosphorus-containing groups;GO:0004683//calmodulin-dependent protein kinase activity;GO:0003674//…	GO:0016310//phosphorylation;GO:0006468//protein phosphorylation;GO:0046777//protein autophosphorylation;GO:0007166//cell surface receptor signaling pathway;GO:0018105//peptidyl-serine phosphorylation;GO:0035556//intracellular signal transduction;GO:0007165//signal transduction;GO:0008150//biological_process;GO:0006464//cellular protein modification process
ENSDARG00000011407	169.595	143.73	51.51	collagen, type II, alpha 1b [Source:ZFIN;Acc:ZDB-GENE-050302-9]	ko04510//Focal adhesion;ko05146//Amoebiasis;ko04512//ECM-receptor interaction;ko04974//Protein digestion and absorption	GO:0005581//collagen trimer;GO:0005575//cellular_component;GO:0043234//protein complex	GO:0005201//extracellular matrix structural constituent;GO:0003674//molecular_function;GO:0005198//structural molecule activity	GO:0033333//fin development;GO:0033334//fin morphogenesis;GO:0008150//biological_process;GO:0048856//anatomical structure development
ENSDARG00000011510	62.505	36.755	25.405	regulator of chromosome condensation 2 [Source:ZFIN;Acc:ZDB-GENE-040426-2213]	-	GO:0005575//cellular_component;GO:0005622//intracellular;GO:0005623//cell;GO:0005634//nucleus;GO:0005730//nucleolus;GO:0043226//organelle;GO:0005575//cellular_component;GO:0005622//intracellular;GO:0005623//cell;GO:0005634//nucleus;GO:0005730//nucleolus;GO:0043226//organelle	GO:0003674//molecular_function;GO:0003674//molecular_function	GO:0007049//cell cycle;GO:0007067//mitosis;GO:0008150//biological_process;GO:0051301//cell division;GO:0007049//cell cycle;GO:0007067//mitosis;GO:0008150//biological_process;GO:0051301//cell division
ENSDARG00000011519	35.99	30.27	14.655	myosin, light chain 4, alkali; atrial, embryonic [Source:ZFIN;Acc:ZDB-GENE-050626-112]	-	GO:0005575//cellular_component;GO:0005575//cellular_component	GO:0005509//calcium ion binding;GO:0003674//molecular_function;GO:0043167//ion binding	-
ENSDARG00000011521	23.075	36.105	17.035	ureidopropionase, beta [Source:ZFIN;Acc:ZDB-GENE-030131-1380]	ko01100//Metabolic pathways;ko00240//Pyrimidine metabolism;ko00983//Drug metabolism - other enzymes;ko00410//beta-Alanine metabolism;ko00770//Pantothenate and CoA biosynthesis	-	GO:0016810//hydrolase activity, acting on carbon-nitrogen (but not peptide) bonds;GO:0003674//molecular_function	GO:0006807//nitrogen compound metabolic process;GO:0008150//biological_process
ENSDARG00000011579	4.74	4.065	2.165	-	-	-	-	-
ENSDARG00000011581	0.555	1.8	4.76	-	-	-	-	-
ENSDARG00000011583	3.435	3.805	10.17	cryptochrome circadian clock 1b [Source:ZFIN;Acc:ZDB-GENE-010426-3]	-	-	GO:0003913//DNA photolyase activity;GO:0003674//molecular_function;GO:0016829//lyase activity	GO:0006281//DNA repair;GO:0006259//DNA metabolic process;GO:0006950//response to stress;GO:0008150//biological_process;GO:0034641//cellular nitrogen compound metabolic process
ENSDARG00000011594	39.265	27.73	15.11	-	-	GO:0005634//nucleus;GO:0000228//nuclear chromosome;GO:0005575//cellular_component;GO:0005622//intracellular;GO:0005623//cell;GO:0005634//nucleus;GO:0005694//chromosome;GO:0043226//organelle;GO:0043234//protein complex	-	GO:0006337//nucleosome disassembly;GO:0006338//chromatin remodeling;GO:0008285//negative regulation of cell proliferation;GO:0043044//ATP-dependent chromatin remodeling;GO:0006357//regulation of transcription from RNA polymerase II promoter;GO:0006281//DNA repair;GO:0030154//cell differentiation;GO:0008150//biological_process;GO:0030154//cell differentiation;GO:0006259//DNA metabolic process;GO:0…
ENSDARG00000011597	27.9	18.395	11.295	-	-	GO:0010494//cytoplasmic stress granule;GO:0005575//cellular_component;GO:0005622//intracellular;GO:0005623//cell;GO:0005737//cytoplasm;GO:0043226//organelle	GO:0003674//molecular_function;GO:0003723//RNA binding	GO:0034063//stress granule assembly;GO:0010603//regulation of cytoplasmic mRNA processing body assembly;GO:0008150//biological_process;GO:0022607//cellular component assembly;GO:0022618//ribonucleoprotein complex assembly;GO:0065003
ENSDARG00000011615	45.135	34.96	22.03	-	-	GO:0005575//cellular_component;GO:0005575//cellular_component	GO:0003674//molecular_function;GO:0003674//molecular_function	GO:0003211//cardiac ventricle formation;GO:0003210//cardiac atrium formation;GO:0002027//regulation of heart rate;GO:0055010//ventricular cardiac muscle tissue morphogenesis;GO:0008150//biological_process;GO:0048856//anatomical structure development;GO:0048646//anatomical structure formation involved in morphogenesis
ENSDARG00000011640	88.44	58.09	36.65	synaptotagmin Vb [Source:ZFIN;Acc:ZDB-GENE-050522-134]	-	GO:0005886//plasma membrane;GO:0016020//membrane;GO:0030672//synaptic vesicle membrane;GO:0005575//cellular_component;GO:0005622//intracellular;GO:0005623//cell;GO:0005737//cytoplasm;GO:0016023//cytoplasmic membrane-bounded vesicle;GO:0043226//organelle;GO:0005886//plasma membrane	GO:0005509//calcium ion binding;GO:0019905//syntaxin binding;GO:0005544//calcium-dependent phospholipid binding;GO:0030276//clathrin binding;GO:0003674//molecular_function;GO:0008289//lipid binding;GO:0043167//ion binding	GO:0017158//regulation of calcium ion-dependent exocytosis;GO:0016079//synaptic vesicle exocytosis;GO:0048791//calcium ion-dependent exocytosis of neurotransmitter;GO:0006906//vesicle fusion;GO:0048488//synaptic vesicle endocytosis;GO:0006810//transport;GO:0007267//cell-cell signaling;GO:0008150//biological_process;GO:0016192//vesicle-mediated transport;GO:0061024//membrane organization
ENSDARG00000011673	7.21	3.14	1.425	-	-	-	-	-
ENSDARG00000011701	1.955	0.58	0.48	-	-	-	-	-
ENSDARG00000011703	2.46	9.16	1.855	clock circadian regulator a [Source:ZFIN;Acc:ZDB-GENE-990630-14]	ko04710//Circadian rhythm - mammal;ko04711//Circadian rhythm - fly	GO:0005737//cytoplasm;GO:0005634//nucleus;GO:0005667//transcription factor complex;GO:0005575//cellular_component;GO:0005622//intracellular;GO:0005623//cell;GO:0043234//protein complex;GO:0043226//organelle;GO:0005737//cytoplasm;GO:0005634//nucleus;GO:0005667//transcription factor complex;GO:0005575//cellular_component;GO:0005622//intracellular;GO:0005623//cell;GO:0043234//protein complex;GO:0043…	GO:0003677//DNA binding;GO:0005515//protein binding;GO:0004871//signal transducer activity;GO:0046982//protein heterodimerization activity;GO:0046983//protein dimerization activity;GO:0003700//sequence-specific DNA binding transcription factor activity;GO:0001071//nucleic acid binding transcription factor activity;GO:0003674//molecular_function;GO:0003677//DNA binding;GO:0003677//DNA binding;GO:0…	GO:0009648//photoperiodism;GO:0045893//positive regulation of transcription, DNA-templated;GO:0007623//circadian rhythm;GO:0009266//response to temperature stimulus;GO:0006355//regulation of transcription, DNA-templated;GO:0007165//signal transduction;GO:0009416//response to light stimulus;GO:0032922//circadian regulation of gene expression;GO:0006351//transcription, DNA-templated;GO:0008150//bio…
ENSDARG00000011723	5.525	3.495	2.28	-	-	-	-	-
ENSDARG00000011724	8.17	4.84	3.53	MARVEL domain containing 1 [Source:ZFIN;Acc:ZDB-GENE-050208-33]	-	GO:0005575//cellular_component	GO:0003674//molecular_function	GO:0008150//biological_process
ENSDARG00000011743	4.39	2.605	2.005	phosphatidylinositol glycan anchor biosynthesis, class O [Source:ZFIN;Acc:ZDB-GENE-091204-80]	-	-	GO:0003674//molecular_function	-
ENSDARG00000011770	6.615	4.285	10.765	dehydrogenase/reductase (SDR family) member 12 [Source:ZFIN;Acc:ZDB-GENE-060929-1134]	-	GO:0005575//cellular_component;GO:0005575//cellular_component	GO:0016491//oxidoreductase activity;GO:0003674//molecular_function	GO:0008152//metabolic process;GO:0008150//biological_process
ENSDARG00000011785	0.32	0.445	1.19	T-box 6 [Source:ZFIN;Acc:ZDB-GENE-020416-5]	-	GO:0005575//cellular_component;GO:0005622//intracellular;GO:0005623//cell;GO:0005634//nucleus;GO:0043226//organelle	GO:0003674//molecular_function;GO:0003677//DNA binding;GO:0001071//nucleic acid binding transcription factor activity	GO:0008150//biological_process;GO:0030154//cell differentiation;GO:0048856//anatomical structure development;GO:0009790//embryo development;GO:0048646//anatomical structure formation involved in morphogenesis;GO:0009058//biosynthetic process;GO:0034641//cellular nitrogen compound metabolic process
ENSDARG00000011809	1.24	1.27	2.54	microtubule associated monooxygenase, calponin and LIM domain containing 1 [Source:ZFIN;Acc:ZDB-GENE-081022-3]	-	-	GO:0003674//molecular_function;GO:0043167//ion binding;GO:0016491//oxidoreductase activity	GO:0007010//cytoskeleton organization;GO:0008150//biological_process
ENSDARG00000011821	9.57	7.825	4.115	procollagen-lysine, 2-oxoglutarate 5-dioxygenase 2 [Source:ZFIN;Acc:ZDB-GENE-070326-1]	ko00310//Lysine degradation	GO:0005581//collagen trimer;GO:0005783//endoplasmic reticulum;GO:0005575//cellular_component;GO:0005622//intracellular;GO:0005623//cell;GO:0005737//cytoplasm;GO:0043226//organelle;GO:0043234//protein complex	GO:0016491//oxidoreductase activity;GO:0016706//oxidoreductase activity, acting on paired donors, with incorporation or reduction of molecular oxygen, 2-oxoglutarate as one donor, and incorporation of one atom each of oxygen into both donors;GO:0008475//procollagen-lysine 5-dioxygenase activity;GO:0051213//dioxygenase activity;GO:0031418//L-ascorbic acid binding;GO:0016705//oxidoreductase activit…	GO:0055114//oxidation-reduction process;GO:0008150//biological_process
ENSDARG00000011825	2.935	1.785	1.22	centrin 3 [Source:ZFIN;Acc:ZDB-GENE-050522-152]	-	GO:0005575//cellular_component;GO:0005575//cellular_component	GO:0005509//calcium ion binding;GO:0003674//molecular_function;GO:0043167//ion binding	-
ENSDARG00000011845	2.82	3.445	6.365	-	-	-	-	-
ENSDARG00000011884	1.215	0.775	1.925	-	-	-	-	-
ENSDARG00000011890	18.905	29.575	8.295	-	-	-	GO:0003913//DNA photolyase activity;GO:0009881//photoreceptor activity;GO:0003674//molecular_function;GO:0004871//signal transducer activity;GO:0016829//lyase activity	GO:0007165//signal transduction;GO:0006281//DNA repair;GO:0006259//DNA metabolic process;GO:0006950//response to stress;GO:0008150//biological_process;GO:0034641//cellular nitrogen compound metabolic process;GO:0007165//signal transduction
ENSDARG00000011925	57.68	26.61	9.845	-	-	-	-	-
ENSDARG00000011926	8.3	5.585	3.385	tubulin polyglutamylase complex subunit 2 [Source:ZFIN;Acc:ZDB-GENE-040704-49]	-	GO:0005575//cellular_component;GO:0005575//cellular_component	GO:0003674//molecular_function;GO:0003674//molecular_function	GO:0008150//biological_process;GO:0008150//biological_process
ENSDARG00000011929	7.72	19.215	29.165	proteolipid protein 1b [Source:ZFIN;Acc:ZDB-GENE-030710-6]	-	GO:0016021//integral component of membrane;GO:0005575//cellular_component	-	-
ENSDARG00000011934	31.8	56.6	72.305	glycogenin 1a [Source:ZFIN;Acc:ZDB-GENE-040426-2910]	-	-	GO:0016757//transferase activity, transferring glycosyl groups;GO:0003674//molecular_function	-
ENSDARG00000011973	4.24	2.97	1.98	solute carrier family 35 (UDP-GlcA/UDP-GalNAc transporter), member D1a [Source:ZFIN;Acc:ZDB-GENE-040826-5]	-	GO:0016020//membrane;GO:0016021//integral component of membrane;GO:0005575//cellular_component	-	-
ENSDARG00000011989	61.4	28.3	20.715	cone-rod homeobox [Source:ZFIN;Acc:ZDB-GENE-010403-1]	-	GO:0005634//nucleus;GO:0005575//cellular_component;GO:0005622//intracellular;GO:0005623//cell;GO:0043226//organelle	GO:0003677//DNA binding;GO:0003700//sequence-specific DNA binding transcription factor activity;GO:0043565//sequence-specific DNA binding;GO:0003674//molecular_function;GO:0001071//nucleic acid binding transcription factor activity	GO:0001654//eye development;GO:0030182//neuron differentiation;GO:0007601//visual perception;GO:0007275//multicellular organismal development;GO:0046671//negative regulation of retinal cell programmed cell death;GO:0042462//eye photoreceptor cell development;GO:0006355//regulation of transcription, DNA-templated;GO:0008150//biological_process;GO:0030154//cell differentiation;GO:0048856//anatomica…
ENSDARG00000011999	31.205	13.715	19.545	ybeY metallopeptidase [Source:ZFIN;Acc:ZDB-GENE-030131-437]	-	-	GO:0004222//metalloendopeptidase activity;GO:0003674//molecular_function;GO:0008233//peptidase activity	GO:0006364//rRNA processing;GO:0008150//biological_process;GO:0034641//cellular nitrogen compound metabolic process;GO:0042254//ribosome biogenesis
ENSDARG00000012002	8.38	5.855	3.885	-	-	-	-	-
ENSDARG00000012013	2.37	2.455	0.945	carboxypeptidase A6 [Source:ZFIN;Acc:ZDB-GENE-091204-331]	-	-	GO:0003674//molecular_function;GO:0043167//ion binding;GO:0008233//peptidase activity	GO:0008150//biological_process
ENSDARG00000012039	8.865	3.36	2.615	tetratricopeptide repeat domain 26 [Source:ZFIN;Acc:ZDB-GENE-041212-41]	-	GO:0005575//cellular_component;GO:0005623//cell;GO:0043234//protein complex;GO:0005622//intracellular;GO:0005929//cilium;GO:0043226//organelle	-	GO:0007165//signal transduction;GO:0008150//biological_process;GO:0000902//cell morphogenesis;GO:0030154//cell differentiation;GO:0048856//anatomical structure development;GO:0006810//transport;GO:0030705//cytoskeleton-dependent intracellular transport;GO:0022607//cellular component assembly;GO:0048646//anatomical structure formation involved in morphogenesis
ENSDARG00000012044	4.215	4.485	8.855	-	-	GO:0005666//DNA-directed RNA polymerase III complex;GO:0000790//nuclear chromatin;GO:0000228//nuclear chromosome;GO:0005575//cellular_component;GO:0005622//intracellular;GO:0005623//cell;GO:0005634//nucleus;GO:0005694//chromosome;GO:0043226//organelle;GO:0005654//nucleoplasm;GO:0043234//protein complex	GO:0001056//RNA polymerase III activity;GO:0003674//molecular_function;GO:0016779//nucleotidyltransferase activity	GO:0006384//transcription initiation from RNA polymerase III promoter;GO:0006359//regulation of transcription from RNA polymerase III promoter;GO:0008150//biological_process;GO:0009058//biosynthetic process;GO:0034641//cellular nitrogen compound metabolic process
ENSDARG00000012066	64.7	49.22	32.13	decorin [Source:ZFIN;Acc:ZDB-GENE-010102-1]	ko04350//TGF-beta signaling pathway	-	GO:0005515//protein binding;GO:0005518//collagen binding;GO:0003674//molecular_function	GO:0050654//chondroitin sulfate proteoglycan metabolic process;GO:0060028//convergent extension involved in axis elongation;GO:0051216//cartilage development;GO:0008150//biological_process;GO:0048856//anatomical structure development;GO:0040007//growth;GO:0006790//sulfur compound metabolic process;GO:0044281//small molecule metabolic process
ENSDARG00000012073	7.945	8.89	3.56	kinesin family member 15 [Source:ZFIN;Acc:ZDB-GENE-050622-16]	-	GO:0005575//cellular_component;GO:0005622//intracellular;GO:0005623//cell;GO:0005856//cytoskeleton;GO:0043226//organelle;GO:0043234//protein complex	GO:0003674//molecular_function;GO:0008092//cytoskeletal protein binding;GO:0043167//ion binding	GO:0008150//biological_process
ENSDARG00000012076	8565.92	3556.38	6720.41	apolipoprotein A-Ia [Source:ZFIN;Acc:ZDB-GENE-990415-14]	ko03320//PPAR signaling pathway;ko04975//Fat digestion and absorption;ko05143//African trypanosomiasis;ko04977//Vitamin digestion and absorption	GO:0005575//cellular_component;GO:0005576//extracellular region;GO:0005615//extracellular space	GO:0003674//molecular_function;GO:0030234//enzyme regulator activity;GO:0008289//lipid binding;GO:0043167//ion binding	GO:0008150//biological_process;GO:0042592//homeostatic process;GO:0022607//cellular component assembly;GO:0065003;GO:0006629//lipid metabolic process;GO:0034641//cellular nitrogen compound metabolic process;GO:0044281//small molecule metabolic process;GO:0006810//transport;GO:0006950//response to stress;GO:0030154//cell differentiation;GO:0048856//anatomical structure development;GO:0009058//bios…
ENSDARG00000012126	14.93	3.845	3.4	zgc:109965 [Source:ZFIN;Acc:ZDB-GENE-050913-21]	-	GO:0016020//membrane;GO:0005575//cellular_component	-	GO:0009966//regulation of signal transduction;GO:0008150//biological_process
ENSDARG00000012194	53.75	115.455	112.215	-	ko01100//Metabolic pathways;ko04146//Peroxisome;ko03320//PPAR signaling pathway;ko00120//Primary bile acid biosynthesis	-	GO:0016747//transferase activity, transferring acyl groups other than amino-acyl groups;GO:0003824//catalytic activity;GO:0003674//molecular_function;GO:0016746//transferase activity, transferring acyl groups	GO:0008152//metabolic process;GO:0008150//biological_process
ENSDARG00000012234	31.125	13.255	25.5	proteasome (prosome, macropain) activator subunit 3 (PA28 gamma; Ki) [Source:ZFIN;Acc:ZDB-GENE-991110-19]	ko05160//Hepatitis C;ko03050//Proteasome;ko04612//Antigen processing and presentation	GO:0008537//proteasome activator complex;GO:0000502//proteasome complex;GO:0005575//cellular_component;GO:0005622//intracellular;GO:0005623//cell;GO:0043234//protein complex	-	-
ENSDARG00000012269	0.665	4.64	0.27	-	-	-	-	-
ENSDARG00000012271	4.18	1.955	1.355	-	-	-	-	-
ENSDARG00000012274	43.365	25.515	20.675	-	ko04910//Insulin signaling pathway;ko03013//RNA transport;ko04150//mTOR signaling pathway	GO:0005737//cytoplasm;GO:0005575//cellular_component;GO:0005622//intracellular;GO:0005623//cell	GO:0003723//RNA binding;GO:0003743//translation initiation factor activity;GO:0003674//molecular_function;GO:0008135//translation factor activity, nucleic acid binding	GO:0006413//translational initiation;GO:0006412//translation;GO:0008150//biological_process;GO:0009058//biosynthetic process
ENSDARG00000012295	13.645	6.8	6.96	-	-	GO:0005575//cellular_component;GO:0005622//intracellular;GO:0005623//cell;GO:0005737//cytoplasm;GO:0005739//mitochondrion;GO:0043226//organelle	GO:0003674//molecular_function;GO:0043167//ion binding	-
ENSDARG00000012297	4.305	0.33	0.67	-	-	-	-	-
ENSDARG00000012306	5.705	7.49	16.4	synaptotagmin XIII [Source:ZFIN;Acc:ZDB-GENE-050417-135]	-	GO:0005886//plasma membrane;GO:0005575//cellular_component;GO:0005623//cell;GO:0005886//plasma membrane	GO:0019905//syntaxin binding;GO:0030276//clathrin binding;GO:0003674//molecular_function	GO:0006906//vesicle fusion;GO:0016079//synaptic vesicle exocytosis;GO:0048791//calcium ion-dependent exocytosis of neurotransmitter;GO:0006810//transport;GO:0007267//cell-cell signaling;GO:0008150//biological_process;GO:0016192//vesicle-mediated transport;GO:0061024//membrane organization
ENSDARG00000012353	2.005	4.23	5.12	vasoactive intestinal peptide receptor 2 [Source:ZFIN;Acc:ZDB-GENE-010406-4]	ko04080//Neuroactive ligand-receptor interaction	GO:0016020//membrane;GO:0016021//integral component of membrane;GO:0005886//plasma membrane;GO:0005575//cellular_component;GO:0005623//cell	GO:0004930//G-protein coupled receptor activity;GO:0004999//vasoactive intestinal polypeptide receptor activity;GO:0004871//signal transducer activity;GO:0004888//transmembrane signaling receptor activity;GO:0003674//molecular_function	GO:0007186//G-protein coupled receptor signaling pathway;GO:0007188//adenylate cyclase-modulating G-protein coupled receptor signaling pathway;GO:0007165//signal transduction;GO:0007166//cell surface receptor signaling pathway;GO:0008150//biological_process
ENSDARG00000012355	0.225	0.73	1.945	polypeptide N-acetylgalactosaminyltransferase 8a, tandem duplicate 1 [Source:ZFIN;Acc:ZDB-GENE-091015-4]	-	GO:0005575//cellular_component;GO:0005622//intracellular;GO:0005623//cell;GO:0005737//cytoplasm;GO:0005794//Golgi apparatus;GO:0043226//organelle	GO:0003674//molecular_function;GO:0043167//ion binding;GO:0016757//transferase activity, transferring glycosyl groups;GO:0016798//hydrolase activity, acting on glycosyl bonds	GO:0005975//carbohydrate metabolic process;GO:0006464//cellular protein modification process;GO:0008150//biological_process;GO:0009058//biosynthetic process
ENSDARG00000012366	107.345	54.805	13.305	fructose-1,6-bisphosphatase 2 [Source:ZFIN;Acc:ZDB-GENE-040822-23]	ko01100//Metabolic pathways;ko04910//Insulin signaling pathway;ko00010//Glycolysis / Gluconeogenesis;ko00030//Pentose phosphate pathway;ko00051//Fructose and mannose metabolism	-	GO:0016787//hydrolase activity;GO:0042578//phosphoric ester hydrolase activity;GO:0042132//fructose 1,6-bisphosphate 1-phosphatase activity;GO:0003674//molecular_function;GO:0016791//phosphatase activity	GO:0005975//carbohydrate metabolic process;GO:0008150//biological_process
ENSDARG00000012368	4.225	2.995	2.015	tetratricopeptide repeat domain 21B [Source:ZFIN;Acc:ZDB-GENE-031010-34]	-	GO:0005575//cellular_component;GO:0005622//intracellular;GO:0005623//cell;GO:0043234//protein complex	-	GO:0008150//biological_process;GO:0000902//cell morphogenesis;GO:0048856//anatomical structure development;GO:0006810//transport;GO:0030705//cytoskeleton-dependent intracellular transport;GO:0009790//embryo development
ENSDARG00000012381	59.86	99.86	143.48	heat shock cognate 70 [Source:ZFIN;Acc:ZDB-GENE-040426-1221]	ko04010//MAPK signaling pathway;ko04144//Endocytosis;ko04141//Protein processing in endoplasmic reticulum;ko05164//Influenza A;ko03040//Spliceosome;ko05145//Toxoplasmosis;ko05162//Measles;ko04612//Antigen processing and presentation;ko05020//Prion diseases	GO:0005575//cellular_component;GO:0005575//cellular_component	GO:0005524//ATP binding;GO:0000166//nucleotide binding;GO:0003674//molecular_function;GO:0043167//ion binding	-
ENSDARG00000012388	12.2	46.06	56.165	-	ko01100//Metabolic pathways;ko05010//Alzheimer's disease;ko05016//Huntington's disease;ko00190//Oxidative phosphorylation;ko05012//Parkinson's disease;ko04260//Cardiac muscle contraction	-	-	-
ENSDARG00000012405	1372.3	1062.29	518.59	-	ko04510//Focal adhesion;ko05146//Amoebiasis;ko04512//ECM-receptor interaction;ko04974//Protein digestion and absorption	GO:0005581//collagen trimer;GO:0005737//cytoplasm;GO:0005575//cellular_component;GO:0005622//intracellular;GO:0005623//cell;GO:0005737//cytoplasm;GO:0043234//protein complex	GO:0005201//extracellular matrix structural constituent;GO:0003674//molecular_function;GO:0005198//structural molecule activity	GO:0033334//fin morphogenesis;GO:0033333//fin development;GO:0031101//fin regeneration;GO:0030278//regulation of ossification;GO:0033339//pectoral fin development;GO:0008150//biological_process;GO:0048856//anatomical structure development;GO:0006950//response to stress;GO:0040007//growth
ENSDARG00000012422	130.46	106.38	24.715	collagen, type XI, alpha 2 [Source:ZFIN;Acc:ZDB-GENE-000208-23]	ko04510//Focal adhesion;ko05146//Amoebiasis;ko04512//ECM-receptor interaction;ko04974//Protein digestion and absorption	GO:0005581//collagen trimer;GO:0005575//cellular_component;GO:0043234//protein complex	GO:0005201//extracellular matrix structural constituent;GO:0003674//molecular_function;GO:0005198//structural molecule activity	GO:0060536//cartilage morphogenesis;GO:0008150//biological_process;GO:0048856//anatomical structure development
ENSDARG00000012426	19.59	15.035	8.51	-	-	GO:0005882//intermediate filament;GO:0005883//neurofilament;GO:0005575//cellular_component;GO:0005622//intracellular;GO:0005623//cell;GO:0005737//cytoplasm;GO:0005856//cytoskeleton;GO:0043226//organelle;GO:0043234//protein complex	GO:0005198//structural molecule activity;GO:0003674//molecular_function	GO:0008150//biological_process;GO:0008150//biological_process
ENSDARG00000012435	0.07	0.3	0.74	Spi-C transcription factor (Spi-1/PU.1 related) [Source:ZFIN;Acc:ZDB-GENE-040912-47]	-	GO:0005634//nucleus;GO:0005575//cellular_component;GO:0005622//intracellular;GO:0005623//cell;GO:0005634//nucleus;GO:0043226//organelle	GO:0000981//sequence-specific DNA binding RNA polymerase II transcription factor activity;GO:0043565//sequence-specific DNA binding;GO:0003700//sequence-specific DNA binding transcription factor activity;GO:0003677//DNA binding;GO:0003674//molecular_function;GO:0001071//nucleic acid binding transcription factor activity	GO:0030154//cell differentiation;GO:0006355//regulation of transcription, DNA-templated;GO:0008150//biological_process;GO:0030154//cell differentiation
ENSDARG00000012453	15.68	13.73	5.885	-	-	GO:0005575//cellular_component;GO:0005575//cellular_component	-	-
ENSDARG00000012485	14.625	13.925	1.58	aurora kinase A [Source:ZFIN;Acc:ZDB-GENE-040801-161]	ko04114//Oocyte meiosis;ko04914//Progesterone-mediated oocyte maturation	GO:0005876//spindle microtubule;GO:0032133//chromosome passenger complex;GO:0031616//spindle pole centrosome;GO:0000780//condensed nuclear chromosome, centromeric region;GO:0051233//spindle midzone;GO:0005575//cellular_component;GO:0005622//intracellular;GO:0005623//cell;GO:0005856//cytoskeleton;GO:0043226//organelle;GO:0000228//nuclear chromosome;GO:0005634//nucleus;GO:0005694//chromosome;GO:000…	GO:0004674//protein serine/threonine kinase activity;GO:0016772//transferase activity, transferring phosphorus-containing groups;GO:0004672//protein kinase activity;GO:0005524//ATP binding;GO:0016740//transferase activity;GO:0004712//protein serine/threonine/tyrosine kinase activity;GO:0035174//histone serine kinase activity;GO:0016301//kinase activity;GO:0000166//nucleotide binding;GO:0003674//m…	GO:0016310//phosphorylation;GO:0006468//protein phosphorylation;GO:0007067//mitosis;GO:0007052//mitotic spindle organization;GO:0032465//regulation of cytokinesis;GO:0008150//biological_process;GO:0007010//cytoskeleton organization;GO:0007049//cell cycle;GO:0007067//mitosis;GO:0006464//cellular protein modification process
ENSDARG00000012495	8.35	4.495	13.755	M-phase phosphoprotein 10 (U3 small nucleolar ribonucleoprotein) [Source:ZFIN;Acc:ZDB-GENE-030131-2146]	ko03008//Ribosome biogenesis in eukaryotes	GO:0005634//nucleus;GO:0005732//small nucleolar ribonucleoprotein complex;GO:0032040//small-subunit processome;GO:0034457//Mpp10 complex;GO:0005575//cellular_component;GO:0005622//intracellular;GO:0005623//cell;GO:0005730//nucleolus;GO:0043226//organelle;GO:0043234//protein complex	-	GO:0030490//maturation of SSU-rRNA;GO:0006364//rRNA processing;GO:0008150//biological_process;GO:0034641//cellular nitrogen compound metabolic process;GO:0042254//ribosome biogenesis
ENSDARG00000012499	5.74	0.485	17.39	period circadian clock 1b [Source:ZFIN;Acc:ZDB-GENE-040419-1]	ko04710//Circadian rhythm - mammal;ko04711//Circadian rhythm - fly	-	GO:0004871//signal transducer activity;GO:0003674//molecular_function	GO:0009416//response to light stimulus;GO:0007165//signal transduction;GO:0009266//response to temperature stimulus;GO:0008150//biological_process
ENSDARG00000012504	35.685	28.935	13.32	retinaldehyde binding protein 1a [Source:ZFIN;Acc:ZDB-GENE-040426-1662]	-	GO:0005622//intracellular;GO:0005575//cellular_component;GO:0005623//cell	GO:0005215//transporter activity;GO:0003674//molecular_function	GO:0009416//response to light stimulus;GO:0007634//optokinetic behavior;GO:0006810//transport;GO:0008150//biological_process
ENSDARG00000012535	0.2	0.34	0.04	-	ko01100//Metabolic pathways;ko04060//Cytokine-cytokine receptor interaction;ko04630//Jak-STAT signaling pathway;ko04640//Hematopoietic cell lineage;ko00350//Tyrosine metabolism;ko05320//Autoimmune thyroid disease	-	-	-
ENSDARG00000012539	0.41	1.245	2.925	deoxyribonuclease I [Source:ZFIN;Acc:ZDB-GENE-040718-423]	-	GO:0005634//nucleus;GO:0005575//cellular_component;GO:0005622//intracellular;GO:0005623//cell;GO:0005634//nucleus;GO:0043226//organelle	GO:0016787//hydrolase activity;GO:0004520//endodeoxyribonuclease activity;GO:0004518//nuclease activity;GO:0016888//endodeoxyribonuclease activity, producing 5'-phosphomonoesters;GO:0004519//endonuclease activity;GO:0004536//deoxyribonuclease activity;GO:0003674//molecular_function	GO:0006308//DNA catabolic process;GO:0000737//DNA catabolic process, endonucleolytic;GO:0006259//DNA metabolic process;GO:0008150//biological_process;GO:0009056//catabolic process;GO:0034641//cellular nitrogen compound metabolic process;GO:0034655
ENSDARG00000012563	8.78	2.87	4.065	prenyl (decaprenyl) diphosphate synthase, subunit 2 [Source:ZFIN;Acc:ZDB-GENE-040718-43]	ko00900//Terpenoid backbone biosynthesis	GO:0005575//cellular_component;GO:0005575//cellular_component	-	GO:0008299//isoprenoid biosynthetic process;GO:0006629//lipid metabolic process;GO:0008150//biological_process;GO:0009058//biosynthetic process
ENSDARG00000012600	0.42	0.595	1.04	-	-	-	-	-
ENSDARG00000012609	0.795	14.53	63.535	hemopexin [Source:ZFIN;Acc:ZDB-GENE-030131-5773]	-	GO:0005575//cellular_component;GO:0005576//extracellular region;GO:0005575//cellular_component;GO:0005576//extracellular region	-	GO:0006810//transport;GO:0008150//biological_process;GO:0006810//transport;GO:0008150//biological_process
ENSDARG00000012627	20.755	20.055	10.26	cell division cycle 34 homolog (S. cerevisiae) b [Source:ZFIN;Acc:ZDB-GENE-040718-439]	-	GO:0005737//cytoplasm;GO:0005575//cellular_component;GO:0005622//intracellular;GO:0005623//cell;GO:0005737//cytoplasm	GO:0031625//ubiquitin protein ligase binding;GO:0019787//small conjugating protein ligase activity;GO:0016874//ligase activity;GO:0003674//molecular_function;GO:0019899//enzyme binding	GO:0043161//proteasome-mediated ubiquitin-dependent protein catabolic process;GO:0000209//protein polyubiquitination;GO:0006464//cellular protein modification process;GO:0008150//biological_process;GO:0009056//catabolic process
ENSDARG00000012667	22.865	13.565	11.335	-	-	GO:0005634//nucleus;GO:0005575//cellular_component;GO:0005622//intracellular;GO:0005623//cell;GO:0043226//organelle	GO:0000983//RNA polymerase II core promoter sequence-specific DNA binding transcription factor activity;GO:0003700//sequence-specific DNA binding transcription factor activity;GO:0043565//sequence-specific DNA binding;GO:0000977//RNA polymerase II regulatory region sequence-specific DNA binding;GO:0000981//sequence-specific DNA binding RNA polymerase II transcription factor activity;GO:0001105//R…	GO:0003091//renal water homeostasis;GO:0008285//negative regulation of cell proliferation;GO:0030510//regulation of BMP signaling pathway;GO:0045944//positive regulation of transcription from RNA polymerase II promoter;GO:0035136//forelimb morphogenesis;GO:0043066//negative regulation of apoptotic process;GO:0048485//sympathetic nervous system development;GO:0055075//potassium ion homeostasis;GO:…
ENSDARG00000012788	8.465	7.815	4.145	forkhead box A3 [Source:ZFIN;Acc:ZDB-GENE-980526-423]	-	GO:0005634//nucleus;GO:0005575//cellular_component;GO:0005622//intracellular;GO:0005623//cell;GO:0005634//nucleus;GO:0043226//organelle	GO:0043565//sequence-specific DNA binding;GO:0003677//DNA binding;GO:0019904//protein domain specific binding;GO:0003700//sequence-specific DNA binding transcription factor activity;GO:0000981//sequence-specific DNA binding RNA polymerase II transcription factor activity;GO:0008134//transcription factor binding;GO:0003674//molecular_function;GO:0001071//nucleic acid binding transcription factor a…	GO:0048785//hatching gland development;GO:0048319//axial mesoderm morphogenesis;GO:0030154//cell differentiation;GO:0006355//regulation of transcription, DNA-templated;GO:0007420//brain development;GO:0006357//regulation of transcription from RNA polymerase II promoter;GO:0021999//neural plate anterior/posterior regionalization;GO:0033504//floor plate development;GO:0008150//biological_process;GO…
ENSDARG00000012801	6.595	8.83	14.955	-	ko01100//Metabolic pathways;ko00010//Glycolysis / Gluconeogenesis;ko00030//Pentose phosphate pathway;ko00051//Fructose and mannose metabolism;ko00052//Galactose metabolism	-	-	-
ENSDARG00000012829	3.675	19.98	24.62	N-acylsphingosine amidohydrolase 2 [Source:ZFIN;Acc:ZDB-GENE-041112-1]	ko01100//Metabolic pathways;ko00600//Sphingolipid metabolism	GO:0005575//cellular_component;GO:0005623//cell;GO:0005886//plasma membrane;GO:0005622//intracellular;GO:0005737//cytoplasm;GO:0005794//Golgi apparatus;GO:0043226//organelle;GO:0005783//endoplasmic reticulum	GO:0003674//molecular_function;GO:0016810//hydrolase activity, acting on carbon-nitrogen (but not peptide) bonds	GO:0006629//lipid metabolic process;GO:0008150//biological_process;GO:0034641//cellular nitrogen compound metabolic process
ENSDARG00000012881	13.875	36.605	27.785	solute carrier family 4 (anion exchanger), member 1a (Diego blood group) [Source:ZFIN;Acc:ZDB-GENE-010525-1]	-	GO:0016020//membrane;GO:0016021//integral component of membrane;GO:0005887//integral component of plasma membrane;GO:0005575//cellular_component;GO:0005623//cell;GO:0005886//plasma membrane;GO:0016020//membrane;GO:0016021//integral component of membrane;GO:0005887//integral component of plasma membrane;GO:0005575//cellular_component;GO:0005623//cell;GO:0005886//plasma membrane	GO:0005452//inorganic anion exchanger activity;GO:0005515//protein binding;GO:0008509//anion transmembrane transporter activity;GO:0005215//transporter activity;GO:0003674//molecular_function;GO:0022857//transmembrane transporter activity;GO:0005452//inorganic anion exchanger activity;GO:0005515//protein binding;GO:0008509//anion transmembrane transporter activity;GO:0005215//transporter activity…	GO:0035162//embryonic hemopoiesis;GO:0006820//anion transport;GO:0030218//erythrocyte differentiation;GO:0015701//bicarbonate transport;GO:0051453//regulation of intracellular pH;GO:0006810//transport;GO:0008150//biological_process;GO:0042592//homeostatic process;GO:0002376//immune system process;GO:0030154//cell differentiation;GO:0048856//anatomical structure development;GO:0055085//transmembra…
ENSDARG00000012948	2.215	3.52	1.47	-	-	-	-	-
ENSDARG00000013004	15.925	9.45	5.115	thymine-DNA glycosylase, tandem duplicate 1 [Source:ZFIN;Acc:ZDB-GENE-050522-44]	ko03410//Base excision repair	GO:0005575//cellular_component;GO:0005575//cellular_component	GO:0016799//hydrolase activity, hydrolyzing N-glycosyl compounds;GO:0003674//molecular_function;GO:0016798//hydrolase activity, acting on glycosyl bonds	GO:0006281//DNA repair;GO:0006259//DNA metabolic process;GO:0006950//response to stress;GO:0008150//biological_process;GO:0034641//cellular nitrogen compound metabolic process
ENSDARG00000013006	3.145	2.44	1.27	-	-	GO:0005575//cellular_component;GO:0005575//cellular_component	GO:0003674//molecular_function;GO:0003674//molecular_function	GO:0008150//biological_process;GO:0008150//biological_process
ENSDARG00000013050	4.895	4.585	9.62	ATP-binding cassette, sub-family C (CFTR/MRP), member 12 [Source:ZFIN;Acc:ZDB-GENE-050517-25]	ko02010//ABC transporters	GO:0005575//cellular_component	GO:0003674//molecular_function;GO:0016887//ATPase activity;GO:0022857//transmembrane transporter activity;GO:0043167//ion binding	GO:0006810//transport;GO:0008150//biological_process;GO:0055085//transmembrane transport
ENSDARG00000013056	9.435	21.905	31.035	inositol-tetrakisphosphate 1-kinase a [Source:ZFIN;Acc:ZDB-GENE-040426-1953]	ko01100//Metabolic pathways;ko04070//Phosphatidylinositol signaling system;ko00562//Inositol phosphate metabolism	GO:0005575//cellular_component;GO:0005622//intracellular;GO:0005623//cell	GO:0003674//molecular_function;GO:0016301//kinase activity;GO:0043167//ion binding;GO:0016853//isomerase activity	GO:0008150//biological_process;GO:0044281//small molecule metabolic process
ENSDARG00000013057	14.405	10.635	5.26	homeobox B5a [Source:ZFIN;Acc:ZDB-GENE-980526-70]	-	GO:0005575//cellular_component;GO:0005622//intracellular;GO:0005623//cell;GO:0005634//nucleus;GO:0043226//organelle	GO:0001071//nucleic acid binding transcription factor activity;GO:0003674//molecular_function;GO:0003677//DNA binding	GO:0008150//biological_process;GO:0009058//biosynthetic process;GO:0034641//cellular nitrogen compound metabolic process;GO:0048856//anatomical structure development
ENSDARG00000013125	11.78	9.125	5.105	distal-less homeobox 1a [Source:ZFIN;Acc:ZDB-GENE-990415-48]	-	GO:0005575//cellular_component;GO:0005622//intracellular;GO:0005623//cell;GO:0005634//nucleus;GO:0043226//organelle	GO:0003674//molecular_function;GO:0003677//DNA binding	GO:0008150//biological_process;GO:0048856//anatomical structure development
ENSDARG00000013134	3.955	1.255	0.865	Uncharacterized protein [Source:UniProtKB/TrEMBL;Acc:E7F4U2]	-	GO:0016021//integral component of membrane;GO:0005575//cellular_component	-	-
ENSDARG00000013236	7.4	12.745	4.515	-	ko01100//Metabolic pathways;ko00100//Steroid biosynthesis	GO:0016020//membrane;GO:0005737//cytoplasm;GO:0005575//cellular_component;GO:0005622//intracellular;GO:0005623//cell;GO:0005737//cytoplasm	GO:0050660//flavin adenine dinucleotide binding;GO:0003824//catalytic activity;GO:0008762//UDP-N-acetylmuramate dehydrogenase activity;GO:0000246//delta24(24-1) sterol reductase activity;GO:0016491//oxidoreductase activity;GO:0016614//oxidoreductase activity, acting on CH-OH group of donors;GO:0003674//molecular_function;GO:0043167//ion binding	GO:0055114//oxidation-reduction process;GO:0008202//steroid metabolic process;GO:0006629//lipid metabolic process;GO:0008150//biological_process
ENSDARG00000013240	1.065	2.2	3.815	-	-	GO:0005615//extracellular space;GO:0005576//extracellular region;GO:0005575//cellular_component	GO:0046872//metal ion binding;GO:0003674//molecular_function;GO:0043167//ion binding	GO:0055072//iron ion homeostasis;GO:0006811//ion transport;GO:0006810//transport;GO:0008150//biological_process;GO:0042592//homeostatic process
ENSDARG00000013266	1.095	1.235	0.615	-	-	-	-	-
ENSDARG00000013292	15.38	9.185	7.09	transmembrane protein 179 [Source:ZFIN;Acc:ZDB-GENE-040808-25]	-	GO:0005575//cellular_component	GO:0003674//molecular_function	-
ENSDARG00000013302	8.425	4.545	3.295	-	-	-	-	-
ENSDARG00000013333	181.565	153.49	90.01	-	-	-	-	-
ENSDARG00000013335	15.965	15.61	6.305	-	-	-	-	-
ENSDARG00000013390	1.405	0.96	2.505	-	-	-	-	-
ENSDARG00000013430	2335.55	1126.57	734.08	-	-	-	-	-
ENSDARG00000013441	3.615	3.645	1.385	hes-related family bHLH transcription factor with YRPW motif 2 [Source:ZFIN;Acc:ZDB-GENE-000526-1]	-	GO:0005575//cellular_component;GO:0005622//intracellular;GO:0005623//cell;GO:0005634//nucleus;GO:0043226//organelle	GO:0003674//molecular_function;GO:0003677//DNA binding	GO:0008150//biological_process;GO:0009058//biosynthetic process;GO:0034641//cellular nitrogen compound metabolic process;GO:0048856//anatomical structure development;GO:0030154//cell differentiation;GO:0007165//signal transduction
ENSDARG00000013476	2.64	4.305	0.39	-	-	-	GO:0005089//Rho guanyl-nucleotide exchange factor activity;GO:0003674//molecular_function	GO:0035023//regulation of Rho protein signal transduction;GO:0008150//biological_process
ENSDARG00000013522	77.71	169.01	234.685	phosphoenolpyruvate carboxykinase 1 (soluble) [Source:ZFIN;Acc:ZDB-GENE-030909-11]	ko01100//Metabolic pathways;ko04910//Insulin signaling pathway;ko04920//Adipocytokine signaling pathway;ko00010//Glycolysis / Gluconeogenesis;ko03320//PPAR signaling pathway;ko00620//Pyruvate metabolism;ko00020//Citrate cycle (TCA cycle);ko04964//Proximal tubule bicarbonate reclamation	-	GO:0017076//purine nucleotide binding;GO:0004611//phosphoenolpyruvate carboxykinase activity;GO:0016740//transferase activity;GO:0004613//phosphoenolpyruvate carboxykinase (GTP) activity;GO:0016301//kinase activity;GO:0005525//GTP binding;GO:0003674//molecular_function;GO:0043167//ion binding;GO:0016829//lyase activity	GO:0009749//response to glucose;GO:0016310//phosphorylation;GO:0006094//gluconeogenesis;GO:0005975//carbohydrate metabolic process;GO:0008150//biological_process;GO:0009058//biosynthetic process
ENSDARG00000013524	1.315	4.99	1.97	cytochrome P450, family 2, subfamily AE, polypeptide 1 [Source:ZFIN;Acc:ZDB-GENE-090312-107]	-	GO:0005575//cellular_component;GO:0005622//intracellular;GO:0005623//cell;GO:0043226//organelle;GO:0005737//cytoplasm	GO:0003674//molecular_function;GO:0016491//oxidoreductase activity;GO:0043167//ion binding	GO:0008150//biological_process;GO:0009056//catabolic process;GO:0006629//lipid metabolic process;GO:0044281//small molecule metabolic process
ENSDARG00000013533	12.055	7.425	5.305	homeobox B4a [Source:ZFIN;Acc:ZDB-GENE-990415-105]	-	GO:0005575//cellular_component;GO:0005622//intracellular;GO:0005623//cell;GO:0005634//nucleus;GO:0043226//organelle	GO:0001071//nucleic acid binding transcription factor activity;GO:0003674//molecular_function;GO:0003677//DNA binding	GO:0008150//biological_process
ENSDARG00000013647	0.025	0.165	0.325	-	-	-	-	-
ENSDARG00000013670	40.17	18.275	38.7	-	-	-	-	-
ENSDARG00000013711	9.545	9.68	30.36	-	-	-	-	-
ENSDARG00000013719	7.965	8.355	1.37	G-2 and S-phase expressed 1 [Source:ZFIN;Acc:ZDB-GENE-050522-493]	ko04115//p53 signaling pathway	GO:0005575//cellular_component;GO:0005575//cellular_component	GO:0003674//molecular_function;GO:0003674//molecular_function	GO:0008150//biological_process;GO:0008150//biological_process
ENSDARG00000013734	10.68	10.275	4.915	polymerase (RNA) III (DNA directed) polypeptide G like b [Source:ZFIN;Acc:ZDB-GENE-041010-32]	ko01100//Metabolic pathways;ko00230//Purine metabolism;ko00240//Pyrimidine metabolism;ko04623//Cytosolic DNA-sensing pathway;ko03020//RNA polymerase	GO:0000790//nuclear chromatin;GO:0005666//DNA-directed RNA polymerase III complex;GO:0005575//cellular_component;GO:0005622//intracellular;GO:0005623//cell;GO:0005634//nucleus;GO:0005654//nucleoplasm;GO:0043226//organelle;GO:0043234//protein complex;GO:0000228//nuclear chromosome;GO:0005694//chromosome	GO:0001056//RNA polymerase III activity;GO:0003674//molecular_function;GO:0016779//nucleotidyltransferase activity	GO:0006384//transcription initiation from RNA polymerase III promoter;GO:0006359//regulation of transcription from RNA polymerase III promoter;GO:0008150//biological_process;GO:0009058//biosynthetic process;GO:0034641//cellular nitrogen compound metabolic process
ENSDARG00000013749	17.945	15.785	8.395	zgc:92113 [Source:ZFIN;Acc:ZDB-GENE-040801-184]	-	GO:0016021//integral component of membrane;GO:0016020//membrane;GO:0005575//cellular_component	-	GO:0006810//transport;GO:0055085//transmembrane transport;GO:0008150//biological_process
ENSDARG00000013752	1.91	1.315	2.97	troponin I type 2a (skeletal, fast), tandem duplicate 3 [Source:ZFIN;Acc:ZDB-GENE-040718-80]	-	GO:0005861//troponin complex;GO:0005575//cellular_component;GO:0005622//intracellular;GO:0005623//cell;GO:0005737//cytoplasm;GO:0005856//cytoskeleton;GO:0043226//organelle;GO:0043234//protein complex	GO:0003674//molecular_function;GO:0003674//molecular_function	-
ENSDARG00000013771	8.645	24.395	24.115	cathepsin Sb, tandem duplicate 2 [Source:ZFIN;Acc:ZDB-GENE-050626-55]	ko05152//Tuberculosis;ko04145//Phagosome;ko04142//Lysosome;ko04612//Antigen processing and presentation	GO:0005575//cellular_component;GO:0005575//cellular_component	GO:0008233//peptidase activity;GO:0008234//cysteine-type peptidase activity;GO:0016787//hydrolase activity;GO:0003674//molecular_function	GO:0006508//proteolysis;GO:0008150//biological_process
ENSDARG00000013775	2.64	3.91	5.44	-	-	-	-	-
ENSDARG00000013794	15.47	23.03	11.155	Kruppel-like factor 11b [Source:ZFIN;Acc:ZDB-GENE-061103-82]	-	-	GO:0046872//metal ion binding;GO:0003676//nucleic acid binding;GO:0003674//molecular_function;GO:0043167//ion binding	GO:0008150//biological_process;GO:0008150//biological_process
ENSDARG00000013828	4	5.66	8.2	-	-	-	-	-
ENSDARG00000013855	2.18	3.75	6.035	solute carrier family 12 (sodium/chloride transporter), member 3 [Source:ZFIN;Acc:ZDB-GENE-030131-9505]	-	GO:0016021//integral component of membrane;GO:0016020//membrane;GO:0005575//cellular_component	GO:0015377//cation:chloride symporter activity;GO:0005215//transporter activity;GO:0003674//molecular_function;GO:0022857//transmembrane transporter activity	GO:0006810//transport;GO:0055085//transmembrane transport;GO:0006811//ion transport;GO:0008150//biological_process
ENSDARG00000013856	18.94	546.165	989.485	amylase, alpha 2A (pancreatic) [Source:ZFIN;Acc:ZDB-GENE-040426-2393]	ko01100//Metabolic pathways;ko04972//Pancreatic secretion;ko04970//Salivary secretion;ko04973//Carbohydrate digestion and absorption;ko00500//Starch and sucrose metabolism	-	GO:0016798//hydrolase activity, acting on glycosyl bonds;GO:0043169//cation binding;GO:0003824//catalytic activity;GO:0004556//alpha-amylase activity;GO:0016787//hydrolase activity;GO:0003674//molecular_function;GO:0043167//ion binding	GO:0005975//carbohydrate metabolic process;GO:0008152//metabolic process;GO:0008150//biological_process
ENSDARG00000013858	1.025	2.345	1.71	cell division cycle 14Aa [Source:ZFIN;Acc:ZDB-GENE-040426-1214]	ko04110//Cell cycle	GO:0005819//spindle;GO:0005813//centrosome;GO:0000922//spindle pole;GO:0005575//cellular_component;GO:0005622//intracellular;GO:0005623//cell;GO:0005856//cytoskeleton;GO:0043226//organelle;GO:0005815//microtubule organizing center	GO:0004721//phosphoprotein phosphatase activity;GO:0008138//protein tyrosine/serine/threonine phosphatase activity;GO:0016791//phosphatase activity;GO:0004725//protein tyrosine phosphatase activity;GO:0016787//hydrolase activity;GO:0003674//molecular_function	GO:0042384//cilium assembly;GO:0051301//cell division;GO:0016311//dephosphorylation;GO:0006470//protein dephosphorylation;GO:0007049//cell cycle;GO:0007096//regulation of exit from mitosis;GO:0008150//biological_process;GO:0006464//cellular protein modification process;GO:0000902//cell morphogenesis;GO:0022607//cellular component assembly;GO:0048646//anatomical structure formation involved in mor…
ENSDARG00000013871	12.56	64.93	70.48	solute carrier family 5 (sodium/glucose cotransporter), member 1 [Source:ZFIN;Acc:ZDB-GENE-040426-1524]	-	GO:0016021//integral component of membrane;GO:0016020//membrane;GO:0005575//cellular_component	GO:0005215//transporter activity;GO:0003674//molecular_function	GO:0006810//transport;GO:0055085//transmembrane transport;GO:0008150//biological_process
ENSDARG00000013926	1.94	2.55	8.635	-	-	GO:0016021//integral component of membrane;GO:0005575//cellular_component	GO:0008028//monocarboxylic acid transmembrane transporter activity;GO:0003674//molecular_function;GO:0022857//transmembrane transporter activity	GO:0034220//ion transmembrane transport;GO:0055085//transmembrane transport;GO:0006810//transport;GO:0008150//biological_process
ENSDARG00000013935	2.55	1.815	1.035	-	-	-	-	-
ENSDARG00000013950	8.85	4.63	3.535	peptide deformylase (mitochondrial) [Source:ZFIN;Acc:ZDB-GENE-050913-42]	-	GO:0005739//mitochondrion;GO:0005575//cellular_component;GO:0005622//intracellular;GO:0005623//cell;GO:0005737//cytoplasm;GO:0005739//mitochondrion;GO:0043226//organelle	GO:0005506//iron ion binding;GO:0042586//peptide deformylase activity;GO:0003674//molecular_function;GO:0016810//hydrolase activity, acting on carbon-nitrogen (but not peptide) bonds;GO:0043167//ion binding	GO:0031365//N-terminal protein amino acid modification;GO:0043686//co-translational protein modification;GO:0018206//peptidyl-methionine modification;GO:0008284//positive regulation of cell proliferation;GO:0008150//biological_process;GO:0006464//cellular protein modification process
ENSDARG00000014017	62.285	75.46	25.445	-	ko01100//Metabolic pathways;ko00230//Purine metabolism;ko00240//Pyrimidine metabolism;ko00480//Glutathione metabolism	-	-	-
ENSDARG00000014024	0.46	1.115	1.31	membrane-spanning 4-domains, subfamily A, member 17A.4 [Source:ZFIN;Acc:ZDB-GENE-070822-16]	-	GO:0016021//integral component of membrane;GO:0005575//cellular_component	-	-
ENSDARG00000014050	4.45	3.125	2.12	nerve growth factor (beta polypeptide) [Source:ZFIN;Acc:ZDB-GENE-000629-2]	ko04010//MAPK signaling pathway;ko04722//Neurotrophin signaling pathway;ko04210//Apoptosis	GO:0005575//cellular_component;GO:0005622//intracellular;GO:0005623//cell;GO:0005737//cytoplasm;GO:0016023//cytoplasmic membrane-bounded vesicle;GO:0043226//organelle;GO:0005576//extracellular region;GO:0005575//cellular_component;GO:0005622//intracellular;GO:0005623//cell;GO:0005737//cytoplasm;GO:0016023//cytoplasmic membrane-bounded vesicle;GO:0043226//organelle;GO:0005576//extracellular region…	GO:0003674//molecular_function;GO:0003674//molecular_function;GO:0003674//molecular_function;GO:0003674//molecular_function;GO:0003674//molecular_function;GO:0003674//molecular_function	GO:0007165//signal transduction;GO:0008150//biological_process;GO:0000902//cell morphogenesis;GO:0030154//cell differentiation;GO:0048856//anatomical structure development;GO:0007165//signal transduction;GO:0008150//biological_process;GO:0000902//cell morphogenesis;GO:0030154//cell differentiation;GO:0048856//anatomical structure development;GO:0007165//signal transduction;GO:0008150//biological_…
ENSDARG00000014059	9.825	13.605	6.035	claudin 5b [Source:ZFIN;Acc:ZDB-GENE-041010-140]	ko04530//Tight junction;ko04670//Leukocyte transendothelial migration;ko05160//Hepatitis C;ko05130//Pathogenic Escherichia coli infection;ko04514//Cell adhesion molecules (CAMs)	GO:0005923//tight junction;GO:0016021//integral component of membrane;GO:0005886//plasma membrane;GO:0030054//cell junction;GO:0016020//membrane;GO:0005575//cellular_component;GO:0005623//cell	GO:0005198//structural molecule activity;GO:0003674//molecular_function	GO:0008150//biological_process;GO:0008150//biological_process
ENSDARG00000014091	12.6	9.835	4.715	odd-skipped related transciption factor 1 [Source:ZFIN;Acc:ZDB-GENE-070321-1]	-	GO:0005575//cellular_component;GO:0005622//intracellular;GO:0005623//cell;GO:0005634//nucleus;GO:0043226//organelle	GO:0003674//molecular_function;GO:0043167//ion binding	GO:0008150//biological_process;GO:0030154//cell differentiation;GO:0048856//anatomical structure development;GO:0048793//pronephros development
ENSDARG00000014169	1.765	2.71	5.625	-	-	-	-	-
ENSDARG00000014201	40.485	28.235	16.985	orthopedia homeobox a [Source:ZFIN;Acc:ZDB-GENE-070216-1]	-	GO:0005634//nucleus;GO:0005575//cellular_component;GO:0005622//intracellular;GO:0005623//cell;GO:0043226//organelle	GO:0003677//DNA binding;GO:0043565//sequence-specific DNA binding;GO:0003674//molecular_function	GO:0021884//forebrain neuron development;GO:0030182//neuron differentiation;GO:0021767//mammillary body development;GO:0071542//dopaminergic neuron differentiation;GO:0021522//spinal cord motor neuron differentiation;GO:0007632//visual behavior;GO:0006355//regulation of transcription, DNA-templated;GO:0008150//biological_process;GO:0030154//cell differentiation;GO:0048856//anatomical structure de…
ENSDARG00000014218	1.015	2.22	4.875	-	-	GO:0005634//nucleus;GO:0005575//cellular_component;GO:0005622//intracellular;GO:0005623//cell;GO:0043226//organelle	GO:0003677//DNA binding;GO:0042826//histone deacetylase binding;GO:0010385//double-stranded methylated DNA binding;GO:0003674//molecular_function;GO:0019899//enzyme binding	GO:0007626//locomotory behavior;GO:0045892//negative regulation of transcription, DNA-templated;GO:0000122//negative regulation of transcription from RNA polymerase II promoter;GO:0008150//biological_process
ENSDARG00000014232	2.66	6.175	7.815	-	-	-	-	-
ENSDARG00000014233	23.65	15.275	9.115	-	-	-	-	-
ENSDARG00000014248	13.61	8.435	5.115	PDZ and LIM domain 3b [Source:ZFIN;Acc:ZDB-GENE-060130-104]	-	-	GO:0046872//metal ion binding;GO:0008270//zinc ion binding;GO:0003674//molecular_function;GO:0043167//ion binding	-
ENSDARG00000014320	4.295	13.12	17.425	-	-	-	-	-
ENSDARG00000014329	207.135	105.62	256.425	nucleophosmin 1a (nucleolar phosphoprotein B23, numatrin) [Source:ZFIN;Acc:ZDB-GENE-021028-1]	-	GO:0005730//nucleolus;GO:0005575//cellular_component;GO:0005622//intracellular;GO:0005623//cell;GO:0005634//nucleus;GO:0005730//nucleolus;GO:0043226//organelle	GO:0003676//nucleic acid binding;GO:0003674//molecular_function	GO:0030097//hemopoiesis;GO:0002376//immune system process;GO:0008150//biological_process;GO:0048856//anatomical structure development
ENSDARG00000014356	0.045	1.365	4.13	kertain 95 [Source:ZFIN;Acc:ZDB-GENE-040718-88]	-	GO:0005882//intermediate filament;GO:0005575//cellular_component;GO:0005622//intracellular;GO:0005623//cell;GO:0005856//cytoskeleton;GO:0043226//organelle;GO:0043234//protein complex	GO:0005198//structural molecule activity;GO:0003674//molecular_function	GO:0008150//biological_process;GO:0008150//biological_process
ENSDARG00000014358	1.2	0.42	0.19	opticin [Source:ZFIN;Acc:ZDB-GENE-030131-1798]	-	-	GO:0005515//protein binding;GO:0003674//molecular_function	GO:0008150//biological_process;GO:0008150//biological_process
ENSDARG00000014462	15.17	9.09	6.25	RAB3C, member RAS oncogene family [Source:ZFIN;Acc:ZDB-GENE-040718-263]	-	GO:0030667//secretory granule membrane;GO:0008021//synaptic vesicle;GO:0005886//plasma membrane;GO:0005768//endosome;GO:0005575//cellular_component;GO:0005622//intracellular;GO:0005623//cell;GO:0005737//cytoplasm;GO:0005768//endosome;GO:0043226//organelle;GO:0005886//plasma membrane;GO:0016023//cytoplasmic membrane-bounded vesicle	GO:0000166//nucleotide binding;GO:0005525//GTP binding;GO:0003924//GTPase activity;GO:0003674//molecular_function;GO:0003924//GTPase activity;GO:0043167//ion binding	GO:0016079//synaptic vesicle exocytosis;GO:0015031//protein transport;GO:0032482//Rab protein signal transduction;GO:0009306//protein secretion;GO:0006904//vesicle docking involved in exocytosis;GO:0007264//small GTPase mediated signal transduction;GO:0006886//intracellular protein transport;GO:0017157//regulation of exocytosis;GO:0008150//biological_process;GO:0006810//transport;GO:0007165//sign…
ENSDARG00000014479	4.17	3.31	1.81	pancreas specific transcription factor, 1a [Source:ZFIN;Acc:ZDB-GENE-030616-579]	-	GO:0005575//cellular_component;GO:0005622//intracellular;GO:0005623//cell;GO:0005737//cytoplasm;GO:0005634//nucleus;GO:0043226//organelle;GO:0043234//protein complex	GO:0003674//molecular_function;GO:0003677//DNA binding;GO:0001071//nucleic acid binding transcription factor activity	GO:0008150//biological_process;GO:0048856//anatomical structure development;GO:0009058//biosynthetic process;GO:0034641//cellular nitrogen compound metabolic process;GO:0007165//signal transduction;GO:0030154//cell differentiation
ENSDARG00000014496	22.48	15.165	4.82	-	-	GO:0016021//integral component of membrane;GO:0005575//cellular_component	GO:0005262//calcium channel activity;GO:0003674//molecular_function;GO:0022857//transmembrane transporter activity	GO:0070509//calcium ion import;GO:0055074//calcium ion homeostasis;GO:0006816//calcium ion transport;GO:0051592//response to calcium ion;GO:0045893//positive regulation of transcription, DNA-templated;GO:0070588//calcium ion transmembrane transport;GO:0042539//hypotonic salinity response;GO:0006950//response to stress;GO:0008150//biological_process;GO:0006810//transport;GO:0055085//transmembrane …
ENSDARG00000014522	20.345	11.99	7.415	cadherin 6 [Source:ZFIN;Acc:ZDB-GENE-050320-92]	-	GO:0016020//membrane;GO:0005886//plasma membrane;GO:0016021//integral component of membrane;GO:0005575//cellular_component;GO:0005623//cell;GO:0016020//membrane;GO:0005886//plasma membrane;GO:0016021//integral component of membrane;GO:0005575//cellular_component;GO:0005623//cell	GO:0005509//calcium ion binding;GO:0003674//molecular_function;GO:0043167//ion binding;GO:0005509//calcium ion binding;GO:0003674//molecular_function;GO:0043167//ion binding	GO:0048793//pronephros development;GO:0060042//retina morphogenesis in camera-type eye;GO:0007156//homophilic cell adhesion;GO:0007155//cell adhesion;GO:0008150//biological_process;GO:0048856//anatomical structure development;GO:0048793//pronephros development;GO:0060042//retina morphogenesis in camera-type eye;GO:0007156//homophilic cell adhesion;GO:0007155//cell adhesion;GO:0008150//biological_…
ENSDARG00000014545	3.75	2.385	1.09	golgi integral membrane protein 4b [Source:ZFIN;Acc:ZDB-GENE-050327-74]	-	GO:0005575//cellular_component;GO:0005575//cellular_component	GO:0003674//molecular_function;GO:0003674//molecular_function	GO:0008150//biological_process;GO:0008150//biological_process
ENSDARG00000014556	103.72	270.74	285.585	-	-	GO:0005615//extracellular space;GO:0005575//cellular_component;GO:0005576//extracellular region;GO:0005615//extracellular space	GO:0004867//serine-type endopeptidase inhibitor activity;GO:0003674//molecular_function;GO:0030234//enzyme regulator activity	-
ENSDARG00000014587	65.195	106.67	132.295	solute carrier family 38, member 5b [Source:ZFIN;Acc:ZDB-GENE-040718-395]	-	GO:0005887//integral component of plasma membrane;GO:0016020//membrane;GO:0016021//integral component of membrane;GO:0005575//cellular_component;GO:0005623//cell;GO:0005886//plasma membrane	GO:0015187//glycine transmembrane transporter activity;GO:0003674//molecular_function;GO:0022857//transmembrane transporter activity	GO:0015816//glycine transport;GO:0003333//amino acid transmembrane transport;GO:0006810//transport;GO:0008150//biological_process;GO:0055085//transmembrane transport
ENSDARG00000014591	186.825	104.68	80.91	interleukin enhancer binding factor 2 [Source:ZFIN;Acc:ZDB-GENE-040426-2345]	-	GO:0005575//cellular_component;GO:0005622//intracellular;GO:0005623//cell;GO:0005634//nucleus;GO:0005730//nucleolus;GO:0043226//organelle	GO:0003674//molecular_function;GO:0043167//ion binding;GO:0003677//DNA binding;GO:0003723//RNA binding	GO:0002376//immune system process;GO:0008150//biological_process;GO:0009058//biosynthetic process;GO:0034641//cellular nitrogen compound metabolic process
ENSDARG00000014676	122.81	129.37	35.805	-	-	-	-	-
ENSDARG00000014685	10.585	12.735	4.885	establishment of sister chromatid cohesion N-acetyltransferase 2 [Source:ZFIN;Acc:ZDB-GENE-050913-156]	-	GO:0005575//cellular_component;GO:0005622//intracellular;GO:0005623//cell;GO:0005694//chromosome;GO:0043226//organelle;GO:0005634//nucleus	GO:0003674//molecular_function;GO:0043167//ion binding;GO:0016746//transferase activity, transferring acyl groups	GO:0008150//biological_process;GO:0008219//cell death;GO:0007049//cell cycle;GO:0048856//anatomical structure development
ENSDARG00000014727	25.875	43.19	64.5	-	ko01100//Metabolic pathways;ko04146//Peroxisome;ko03320//PPAR signaling pathway;ko00280//Valine, leucine and isoleucine degradation;ko00071//Fatty acid metabolism;ko00640//Propanoate metabolism;ko00410//beta-Alanine metabolism;ko01040//Biosynthesis of unsaturated fatty acids;ko00592//alpha-Linolenic acid metabolism	GO:0005777//peroxisome;GO:0005575//cellular_component;GO:0005622//intracellular;GO:0005623//cell;GO:0005737//cytoplasm;GO:0043226//organelle	GO:0016627//oxidoreductase activity, acting on the CH-CH group of donors;GO:0003995//acyl-CoA dehydrogenase activity;GO:0050660//flavin adenine dinucleotide binding;GO:0003997//acyl-CoA oxidase activity;GO:0003674//molecular_function;GO:0016491//oxidoreductase activity;GO:0043167//ion binding	GO:0055114//oxidation-reduction process;GO:0006635//fatty acid beta-oxidation;GO:0008152//metabolic process;GO:0006631//fatty acid metabolic process;GO:0006629//lipid metabolic process;GO:0008150//biological_process;GO:0044281//small molecule metabolic process;GO:0009056//catabolic process
ENSDARG00000014731	32.105	14.59	30.165	-	-	-	-	-
ENSDARG00000014803	20.045	24.405	41.225	-	-	GO:0005575//cellular_component;GO:0005575//cellular_component	GO:0003674//molecular_function;GO:0003674//molecular_function	GO:0008150//biological_process;GO:0008150//biological_process
ENSDARG00000014805	10.125	13.51	6.125	four and a half LIM domains 5 [Source:ZFIN;Acc:ZDB-GENE-040822-3]	-	GO:0005575//cellular_component;GO:0005575//cellular_component	GO:0046872//metal ion binding;GO:0008270//zinc ion binding;GO:0003674//molecular_function;GO:0043167//ion binding	-
ENSDARG00000014898	32.92	18.58	14.165	nuclear cap binding protein subunit 2 [Source:ZFIN;Acc:ZDB-GENE-020419-31]	ko03013//RNA transport;ko03040//Spliceosome;ko03015//mRNA surveillance pathway	GO:0005575//cellular_component;GO:0005622//intracellular;GO:0005623//cell;GO:0043234//protein complex;GO:0005737//cytoplasm;GO:0005634//nucleus;GO:0043226//organelle	GO:0003674//molecular_function;GO:0003723//RNA binding	GO:0008150//biological_process;GO:0006810//transport;GO:0006913//nucleocytoplasmic transport;GO:0006397//mRNA processing;GO:0034641//cellular nitrogen compound metabolic process;GO:0009056//catabolic process;GO:0034655
ENSDARG00000014916	2.205	9.555	12.66	solute carrier family 10 (sodium/bile acid cotransporter), member 2 [Source:ZFIN;Acc:ZDB-GENE-040426-1328]	-	GO:0016021//integral component of membrane;GO:0005887//integral component of plasma membrane;GO:0016324//apical plasma membrane;GO:0016020//membrane;GO:0005575//cellular_component;GO:0005623//cell;GO:0005886//plasma membrane	GO:0008508//bile acid:sodium symporter activity;GO:0003674//molecular_function;GO:0022857//transmembrane transporter activity	GO:0015721//bile acid and bile salt transport;GO:0006810//transport;GO:0008150//biological_process
ENSDARG00000014941	9.185	6.59	4.36	Tp53rk binding protein [Source:ZFIN;Acc:ZDB-GENE-041114-68]	-	GO:0005634//nucleus;GO:0005575//cellular_component;GO:0005622//intracellular;GO:0005623//cell;GO:0043226//organelle	-	GO:0008150//biological_process;GO:0008150//biological_process
ENSDARG00000014943	12.265	12.71	2.005	-	-	GO:0032154//cleavage furrow;GO:0005871//kinesin complex;GO:0005634//nucleus;GO:0005737//cytoplasm;GO:0005622//intracellular;GO:0005874//microtubule;GO:0005575//cellular_component;GO:0005622//intracellular;GO:0005623//cell;GO:0005856//cytoskeleton;GO:0043226//organelle;GO:0043234//protein complex;GO:0005737//cytoplasm;GO:0005634//nucleus	GO:0005524//ATP binding;GO:0003777//microtubule motor activity;GO:0016887//ATPase activity;GO:0008017//microtubule binding;GO:0000166//nucleotide binding;GO:0003674//molecular_function;GO:0008092//cytoskeletal protein binding;GO:0016887//ATPase activity;GO:0043167//ion binding	GO:0040016//embryonic cleavage;GO:0051256//spindle midzone assembly involved in mitosis;GO:0007018//microtubule-based movement;GO:0000281//mitotic cytokinesis;GO:0036089//cleavage furrow formation;GO:0047496//vesicle transport along microtubule;GO:0006810//transport;GO:0008150//biological_process;GO:0030705//cytoskeleton-dependent intracellular transport;GO:0007049//cell cycle;GO:0051301//cell di…
ENSDARG00000014963	9.065	3.655	5.375	TP53 regulated inhibitor of apoptosis 1 [Source:ZFIN;Acc:ZDB-GENE-050417-161]	-	GO:0005758//mitochondrial intermembrane space;GO:0005575//cellular_component;GO:0005622//intracellular;GO:0005623//cell;GO:0005737//cytoplasm;GO:0005739//mitochondrion;GO:0043226//organelle	-	GO:0048793//pronephros development;GO:0008150//biological_process;GO:0048856//anatomical structure development
ENSDARG00000015033	1.865	3.225	7.35	solute carrier family 23 (ascorbic acid transporter), member 1 [Source:ZFIN;Acc:ZDB-GENE-080804-2]	-	GO:0016020//membrane;GO:0005575//cellular_component	GO:0070890//sodium-dependent L-ascorbate transmembrane transporter activity;GO:0005215//transporter activity;GO:0003674//molecular_function;GO:0022857//transmembrane transporter activity	GO:0055085//transmembrane transport;GO:0006810//transport;GO:0015882//L-ascorbic acid transport;GO:0008150//biological_process
ENSDARG00000015057	1.295	0.415	2.405	ubiquitin-conjugating enzyme E2D 4 (putative) [Source:ZFIN;Acc:ZDB-GENE-070424-86]	ko04141//Protein processing in endoplasmic reticulum;ko04120//Ubiquitin mediated proteolysis;ko05131//Shigellosis	GO:0005575//cellular_component;GO:0005575//cellular_component	GO:0016874//ligase activity;GO:0003674//molecular_function	-
ENSDARG00000015088	22.16	8.04	18.72	DnaJ (Hsp40) homolog, subfamily B, member 11 [Source:ZFIN;Acc:ZDB-GENE-031113-9]	ko04141//Protein processing in endoplasmic reticulum	-	GO:0051082//unfolded protein binding;GO:0003674//molecular_function	GO:0006457//protein folding;GO:0008150//biological_process
ENSDARG00000015134	3.565	1.445	9.545	calcium/calmodulin-dependent protein kinase kinase 1, alpha b [Source:ZFIN;Acc:ZDB-GENE-080722-13]	-	GO:0005575//cellular_component;GO:0005575//cellular_component;GO:0005575//cellular_component;GO:0005575//cellular_component	GO:0016301//kinase activity;GO:0000166//nucleotide binding;GO:0004672//protein kinase activity;GO:0005524//ATP binding;GO:0004674//protein serine/threonine kinase activity;GO:0016740//transferase activity;GO:0016772//transferase activity, transferring phosphorus-containing groups;GO:0003674//molecular_function;GO:0043167//ion binding;GO:0016301//kinase activity;GO:0000166//nucleotide binding;GO:0…	GO:0006468//protein phosphorylation;GO:0016310//phosphorylation;GO:0008150//biological_process;GO:0006464//cellular protein modification process;GO:0006468//protein phosphorylation;GO:0016310//phosphorylation;GO:0008150//biological_process;GO:0006464//cellular protein modification process
ENSDARG00000015156	10.625	9.955	4.95	-	-	-	-	-
ENSDARG00000015161	14.725	10.97	6.905	zgc:92664 [Source:ZFIN;Acc:ZDB-GENE-040718-119]	-	GO:0005575//cellular_component;GO:0005575//cellular_component	GO:0003674//molecular_function;GO:0003674//molecular_function	GO:0008150//biological_process;GO:0008150//biological_process
ENSDARG00000015164	24.26	53.2	106.935	MAP kinase interacting serine/threonine kinase 2b [Source:ZFIN;Acc:ZDB-GENE-030829-2]	ko04010//MAPK signaling pathway;ko04910//Insulin signaling pathway	GO:0005634//nucleus;GO:0005737//cytoplasm;GO:0005575//cellular_component;GO:0005622//intracellular;GO:0005623//cell;GO:0005737//cytoplasm;GO:0005634//nucleus;GO:0043226//organelle;GO:0005634//nucleus;GO:0005737//cytoplasm;GO:0005575//cellular_component;GO:0005622//intracellular;GO:0005623//cell;GO:0005737//cytoplasm;GO:0005634//nucleus;GO:0043226//organelle	GO:0005524//ATP binding;GO:0016772//transferase activity, transferring phosphorus-containing groups;GO:0004672//protein kinase activity;GO:0005516//calmodulin binding;GO:0016740//transferase activity;GO:0009931//calcium-dependent protein serine/threonine kinase activity;GO:0004683//calmodulin-dependent protein kinase activity;GO:0016301//kinase activity;GO:0000166//nucleotide binding;GO:0003674//…	GO:0016310//phosphorylation;GO:0006468//protein phosphorylation;GO:0035556//intracellular signal transduction;GO:0018105//peptidyl-serine phosphorylation;GO:0046777//protein autophosphorylation;GO:0007166//cell surface receptor signaling pathway;GO:0007165//signal transduction;GO:0008150//biological_process;GO:0006464//cellular protein modification process;GO:0016310//phosphorylation;GO:0006468//…
ENSDARG00000015221	10.13	4.34	7.38	-	-	-	-	-
ENSDARG00000015228	2.16	4.02	8.11	-	ko04141//Protein processing in endoplasmic reticulum;ko05110//Vibrio cholerae infection	-	-	-
ENSDARG00000015266	54.92	35.865	21.35	mab-21-like 2 [Source:ZFIN;Acc:ZDB-GENE-011101-3]	-	GO:0005575//cellular_component;GO:0005622//intracellular;GO:0005623//cell;GO:0005634//nucleus;GO:0043226//organelle	-	GO:0008150//biological_process;GO:0048856//anatomical structure development;GO:0009790//embryo development
ENSDARG00000015273	10.405	7.54	3.23	alkaline phosphatase, intestinal, tandem duplicate 1 [Source:ZFIN;Acc:ZDB-GENE-050327-78]	ko01100//Metabolic pathways;ko00790//Folate biosynthesis	GO:0005575//cellular_component;GO:0005575//cellular_component	GO:0016791//phosphatase activity;GO:0003824//catalytic activity;GO:0016787//hydrolase activity;GO:0004035//alkaline phosphatase activity;GO:0003674//molecular_function	GO:0008152//metabolic process;GO:0008150//biological_process
ENSDARG00000015292	14.345	8.865	5.655	ubiquitin-conjugating enzyme E2G 1a (UBC7 homolog, yeast) [Source:ZFIN;Acc:ZDB-GENE-030131-6065]	ko04141//Protein processing in endoplasmic reticulum;ko04120//Ubiquitin mediated proteolysis;ko05012//Parkinson's disease	GO:0005737//cytoplasm;GO:0005575//cellular_component;GO:0005622//intracellular;GO:0005623//cell;GO:0005737//cytoplasm	GO:0031625//ubiquitin protein ligase binding;GO:0016874//ligase activity;GO:0003674//molecular_function;GO:0019899//enzyme binding	GO:0006511//ubiquitin-dependent protein catabolic process;GO:0000209//protein polyubiquitination;GO:0006464//cellular protein modification process;GO:0008150//biological_process;GO:0009056//catabolic process
ENSDARG00000015314	74.3	45.825	25.655	zinc finger, C4H2 domain containing [Source:ZFIN;Acc:ZDB-GENE-030131-2207]	-	GO:0005575//cellular_component;GO:0005623//cell;GO:0005886//plasma membrane;GO:0005622//intracellular;GO:0005634//nucleus;GO:0043226//organelle;GO:0005737//cytoplasm	GO:0003674//molecular_function;GO:0043167//ion binding	GO:0008150//biological_process;GO:0030154//cell differentiation;GO:0048856//anatomical structure development
ENSDARG00000015355	0.615	0.785	1.865	FOS-like antigen 1a [Source:ZFIN;Acc:ZDB-GENE-061207-7]	ko04310//Wnt signaling pathway;ko04380//Osteoclast differentiation	GO:0005634//nucleus;GO:0005575//cellular_component;GO:0005622//intracellular;GO:0005623//cell;GO:0043226//organelle	GO:0003677//DNA binding;GO:0043565//sequence-specific DNA binding;GO:0003700//sequence-specific DNA binding transcription factor activity;GO:0001071//nucleic acid binding transcription factor activity;GO:0003674//molecular_function	GO:0006355//regulation of transcription, DNA-templated;GO:0006357//regulation of transcription from RNA polymerase II promoter;GO:0008150//biological_process
ENSDARG00000015399	10.025	7.665	4.175	forkhead box F1 [Source:ZFIN;Acc:ZDB-GENE-050419-153]	-	GO:0005575//cellular_component;GO:0005622//intracellular;GO:0005623//cell;GO:0005634//nucleus;GO:0043226//organelle	GO:0003674//molecular_function;GO:0003677//DNA binding;GO:0001071//nucleic acid binding transcription factor activity	GO:0008150//biological_process;GO:0030154//cell differentiation
ENSDARG00000015425	1.375	1.755	3.015	solute carrier family 24 (sodium/potassium/calcium exchanger), member 4a [Source:ZFIN;Acc:ZDB-GENE-050417-291]	-	GO:0016020//membrane;GO:0005887//integral component of plasma membrane;GO:0016021//integral component of membrane;GO:0005575//cellular_component;GO:0005623//cell;GO:0005886//plasma membrane	GO:0008273//calcium, potassium:sodium antiporter activity;GO:0003674//molecular_function;GO:0022857//transmembrane transporter activity	GO:0006811//ion transport;GO:0055085//transmembrane transport;GO:0006810//transport;GO:0008150//biological_process
ENSDARG00000015460	12.46	14.265	2.47	-	-	GO:0097149//centralspindlin complex;GO:0005575//cellular_component;GO:0005622//intracellular;GO:0005623//cell;GO:0005856//cytoskeleton;GO:0043226//organelle;GO:0043234//protein complex	GO:0046872//metal ion binding;GO:0008017//microtubule binding;GO:0003674//molecular_function;GO:0008092//cytoskeletal protein binding;GO:0043167//ion binding	GO:0007165//signal transduction;GO:0090307//spindle assembly involved in mitosis;GO:0035556//intracellular signal transduction;GO:0000915//actomyosin contractile ring assembly;GO:0007010//cytoskeleton organization;GO:0007049//cell cycle;GO:0008150//biological_process;GO:0022607//cellular component assembly;GO:0051301//cell division;GO:0006461//protein complex assembly;GO:0007067//mitosis;GO:00650…
ENSDARG00000015524	57.045	21.355	30.5	phosphoribosyl pyrophosphate synthetase 1A [Source:ZFIN;Acc:ZDB-GENE-011212-5]	ko01100//Metabolic pathways;ko00230//Purine metabolism;ko00030//Pentose phosphate pathway	-	GO:0000287//magnesium ion binding;GO:0004749//ribose phosphate diphosphokinase activity;GO:0003674//molecular_function;GO:0043167//ion binding	GO:0009156//ribonucleoside monophosphate biosynthetic process;GO:0044249//cellular biosynthetic process;GO:0009165//nucleotide biosynthetic process;GO:0008150//biological_process;GO:0009058//biosynthetic process;GO:0034641//cellular nitrogen compound metabolic process;GO:0044281//small molecule metabolic process
ENSDARG00000015559	14.925	13.33	6.72	follistatin-like 1a [Source:ZFIN;Acc:ZDB-GENE-030131-4148]	-	GO:0005576//extracellular region;GO:0005575//cellular_component;GO:0005576//extracellular region	GO:0005509//calcium ion binding;GO:0003674//molecular_function;GO:0043167//ion binding	GO:0060034//notochord cell differentiation;GO:0030510//regulation of BMP signaling pathway;GO:0030903//notochord development;GO:0008150//biological_process;GO:0009790//embryo development;GO:0048856//anatomical structure development;GO:0030154//cell differentiation
ENSDARG00000015576	1.185	0.535	2.075	-	-	-	-	-
ENSDARG00000015674	11.325	8.09	4.605	-	-	-	-	-
ENSDARG00000015676	27.34	21.645	55.21	NMD3 ribosome export adaptor [Source:ZFIN;Acc:ZDB-GENE-050320-149]	ko03013//RNA transport;ko03008//Ribosome biogenesis in eukaryotes	GO:0005575//cellular_component;GO:0005622//intracellular;GO:0005623//cell;GO:0005634//nucleus;GO:0043226//organelle;GO:0005737//cytoplasm;GO:0005654//nucleoplasm	-	GO:0006810//transport;GO:0008150//biological_process
ENSDARG00000015731	3.915	8.425	9.325	anoctamin 5a [Source:ZFIN;Acc:ZDB-GENE-091013-2]	-	GO:0005575//cellular_component	-	-
ENSDARG00000015759	57.5	38.69	14.195	tetraspanin 7 [Source:ZFIN;Acc:ZDB-GENE-030131-5435]	-	GO:0016021//integral component of membrane;GO:0016020//membrane;GO:0005575//cellular_component	-	-
ENSDARG00000015765	6.7	3.62	3.04	isoamyl acetate-hydrolyzing esterase 1 homolog (S. cerevisiae) [Source:ZFIN;Acc:ZDB-GENE-041008-186]	-	-	GO:0003674//molecular_function;GO:0004518//nuclease activity	GO:0006629//lipid metabolic process;GO:0008150//biological_process;GO:0009056//catabolic process
ENSDARG00000015790	87.755	49.075	27.245	-	ko04260//Cardiac muscle contraction;ko04972//Pancreatic secretion;ko04971//Gastric acid secretion;ko04970//Salivary secretion;ko04976//Bile secretion;ko04961//Endocrine and other factor-regulated calcium reabsorption;ko04973//Carbohydrate digestion and absorption;ko04960//Aldosterone-regulated sodium reabsorption;ko04974//Protein digestion and absorption;ko04964//Proximal tubule bicarbonate recla…	GO:0005890//sodium:potassium-exchanging ATPase complex;GO:0005575//cellular_component;GO:0005623//cell;GO:0005886//plasma membrane;GO:0043234//protein complex	-	GO:0006813//potassium ion transport;GO:0006814//sodium ion transport;GO:0006810//transport;GO:0008150//biological_process
ENSDARG00000015793	3.25	2.47	1.325	-	ko05016//Huntington's disease;ko04916//Melanogenesis;ko05215//Prostate cancer;ko04725//Cholinergic synapse;ko04962//Vasopressin-regulated water reabsorption	-	GO:0043565//sequence-specific DNA binding;GO:0003700//sequence-specific DNA binding transcription factor activity;GO:0035497//cAMP response element binding;GO:0003674//molecular_function;GO:0003677//DNA binding;GO:0001071//nucleic acid binding transcription factor activity	GO:0045944//positive regulation of transcription from RNA polymerase II promoter;GO:0006355//regulation of transcription, DNA-templated;GO:0030968//endoplasmic reticulum unfolded protein response;GO:0006950//response to stress;GO:0007165//signal transduction;GO:0008150//biological_process
ENSDARG00000015866	14932.8	8746.4	4959.2	-	-	-	-	GO:0000280//nuclear division;GO:0055113//epiboly involved in gastrulation with mouth forming second;GO:0043009//chordate embryonic development;GO:0008150//biological_process;GO:0009790//embryo development;GO:0048856//anatomical structure development
ENSDARG00000015869	10.62	5.705	1.295	solute carrier family 22 (organic cation/carnitine transporter), member 16 [Source:ZFIN;Acc:ZDB-GENE-041001-166]	-	GO:0016021//integral component of membrane;GO:0016020//membrane;GO:0005575//cellular_component	GO:0022857//transmembrane transporter activity;GO:0003674//molecular_function	GO:0055085//transmembrane transport;GO:0006810//transport;GO:0008150//biological_process
ENSDARG00000015887	17.345	33.62	58.605	-	-	GO:0042612//MHC class I protein complex;GO:0005575//cellular_component;GO:0005623//cell;GO:0005886//plasma membrane;GO:0043234//protein complex	-	GO:0002474//antigen processing and presentation of peptide antigen via MHC class I;GO:0002376//immune system process;GO:0008150//biological_process
ENSDARG00000015901	32.9	13.035	12.035	polypyrimidine tract binding protein 2b [Source:ZFIN;Acc:ZDB-GENE-060810-49]	-	GO:0005634//nucleus;GO:0005575//cellular_component;GO:0005622//intracellular;GO:0005623//cell;GO:0043226//organelle	GO:0003723//RNA binding;GO:0000166//nucleotide binding;GO:0003676//nucleic acid binding;GO:0003674//molecular_function	GO:0006397//mRNA processing;GO:0008150//biological_process;GO:0034641//cellular nitrogen compound metabolic process
ENSDARG00000015917	18.32	17.115	8.05	ring finger protein, transmembrane 1 [Source:ZFIN;Acc:ZDB-GENE-040426-2324]	-	GO:0005575//cellular_component	GO:0003674//molecular_function;GO:0043167//ion binding	-
ENSDARG00000015922	3.47	4.695	9.49	zgc:153952 [Source:ZFIN;Acc:ZDB-GENE-061103-427]	-	GO:0005634//nucleus;GO:0005575//cellular_component;GO:0005622//intracellular;GO:0005623//cell;GO:0005634//nucleus;GO:0043226//organelle	GO:0004672//protein kinase activity;GO:0005524//ATP binding;GO:0004674//protein serine/threonine kinase activity;GO:0016772//transferase activity, transferring phosphorus-containing groups;GO:0003674//molecular_function;GO:0016301//kinase activity;GO:0043167//ion binding	GO:0006468//protein phosphorylation;GO:0006464//cellular protein modification process;GO:0008150//biological_process
ENSDARG00000015930	65.3	37.615	83.99	-	-	GO:0005575//cellular_component;GO:0005575//cellular_component	-	-
ENSDARG00000015946	8.87	8.735	4.065	-	-	-	-	-
ENSDARG00000015947	160.36	129.53	60.34	-	-	-	GO:0005515//protein binding;GO:0003674//molecular_function;GO:0005509//calcium ion binding;GO:0043167//ion binding;GO:0000287//magnesium ion binding;GO:0003674//molecular_function;GO:0043167//ion binding	-
ENSDARG00000015989	6.36	4.255	3.165	-	-	-	-	-
ENSDARG00000016048	13.93	14.19	4.26	-	-	-	-	-
ENSDARG00000016065	0.185	0.375	0.63	toll-like receptor 3 [Source:ZFIN;Acc:ZDB-GENE-040219-7]	ko05164//Influenza A;ko05160//Hepatitis C;ko04620//Toll-like receptor signaling pathway	GO:0016021//integral component of membrane;GO:0016020//membrane;GO:0005575//cellular_component	GO:0005515//protein binding;GO:0003674//molecular_function	GO:0002376//immune system process;GO:0007165//signal transduction;GO:0009615//response to virus;GO:0009617//response to bacterium;GO:0045087//innate immune response;GO:0006950//response to stress;GO:0008150//biological_process
ENSDARG00000016080	11.225	9.34	20.74	-	ko03008//Ribosome biogenesis in eukaryotes	-	-	-
ENSDARG00000016085	2.845	5.3	7.3	-	-	-	GO:0046872//metal ion binding;GO:0003674//molecular_function;GO:0043167//ion binding	-
ENSDARG00000016088	24.34	10.06	9.98	reticulon 2a [Source:ZFIN;Acc:ZDB-GENE-060420-1]	-	GO:0016020//membrane;GO:0016021//integral component of membrane;GO:0005783//endoplasmic reticulum;GO:0012505//endomembrane system;GO:0005575//cellular_component;GO:0005623//cell;GO:0005622//intracellular;GO:0005737//cytoplasm;GO:0043226//organelle	GO:0003674//molecular_function;GO:0003674//molecular_function	GO:0008150//biological_process;GO:0008150//biological_process
ENSDARG00000016122	14.18	5.755	5.37	peptidyl-tRNA hydrolase domain containing 1 [Source:ZFIN;Acc:ZDB-GENE-081110-2]	-	-	GO:0004045//aminoacyl-tRNA hydrolase activity;GO:0003674//molecular_function	-
ENSDARG00000016132	5.525	6.475	11.825	kelch-like ECH-associated protein 1a [Source:ZFIN;Acc:ZDB-GENE-030131-556]	-	-	-	GO:0071466//cellular response to xenobiotic stimulus;GO:0071379//cellular response to prostaglandin stimulus;GO:0008150//biological_process
ENSDARG00000016260	19.945	14.92	30.815	fragile X mental retardation, autosomal homolog 2 [Source:ZFIN;Acc:ZDB-GENE-040426-943]	ko03013//RNA transport	GO:0005737//cytoplasm;GO:0005844//polysome;GO:0005634//nucleus;GO:0005575//cellular_component;GO:0005622//intracellular;GO:0005623//cell;GO:0005634//nucleus;GO:0043226//organelle;GO:0005737//cytoplasm	GO:0003676//nucleic acid binding;GO:0003729//mRNA binding;GO:0003723//RNA binding;GO:0003674//molecular_function;GO:0003729//mRNA binding	GO:0017148//negative regulation of translation;GO:0008150//biological_process
ENSDARG00000016290	0.105	0.42	2.685	-	-	-	-	-
ENSDARG00000016301	136.615	90.02	67.845	zgc:65894 [Source:ZFIN;Acc:ZDB-GENE-030131-7741]	ko04145//Phagosome;ko04540//Gap junction;ko05130//Pathogenic Escherichia coli infection	GO:0005737//cytoplasm;GO:0005874//microtubule;GO:0005856//cytoskeleton;GO:0043234//protein complex;GO:0005575//cellular_component;GO:0005622//intracellular;GO:0005623//cell;GO:0043226//organelle	GO:0003924//GTPase activity;GO:0005525//GTP binding;GO:0000166//nucleotide binding;GO:0005200//structural constituent of cytoskeleton;GO:0003674//molecular_function;GO:0005198//structural molecule activity;GO:0043167//ion binding	GO:0007017//microtubule-based process;GO:0051258//protein polymerization;GO:0006461//protein complex assembly;GO:0008150//biological_process;GO:0022607//cellular component assembly;GO:0065003
ENSDARG00000016304	38.26	31.645	17.595	transcription factor Dp-1, b [Source:ZFIN;Acc:ZDB-GENE-040426-1746]	-	GO:0005667//transcription factor complex;GO:0005634//nucleus;GO:0005575//cellular_component;GO:0005622//intracellular;GO:0005623//cell;GO:0043226//organelle;GO:0043234//protein complex	GO:0003677//DNA binding;GO:0008134//transcription factor binding;GO:0003700//sequence-specific DNA binding transcription factor activity;GO:0000981//sequence-specific DNA binding RNA polymerase II transcription factor activity;GO:0003713//transcription coactivator activity;GO:0000988//protein binding transcription factor activity;GO:0003674//molecular_function;GO:0001071//nucleic acid binding tra…	GO:0006355//regulation of transcription, DNA-templated;GO:0000278//mitotic cell cycle;GO:0006357//regulation of transcription from RNA polymerase II promoter;GO:0006351//transcription, DNA-templated;GO:0007049//cell cycle;GO:0008150//biological_process;GO:0009058//biosynthetic process;GO:0034641//cellular nitrogen compound metabolic process
ENSDARG00000016318	24.03	14.98	10.455	-	-	-	-	-
ENSDARG00000016363	3.44	2.25	1.345	-	-	GO:0005634//nucleus;GO:0005575//cellular_component;GO:0005622//intracellular;GO:0005623//cell;GO:0043226//organelle	GO:0046983//protein dimerization activity;GO:0003677//DNA binding;GO:0003674//molecular_function	GO:0050768//negative regulation of neurogenesis;GO:0006355//regulation of transcription, DNA-templated;GO:0042063//gliogenesis;GO:0006351//transcription, DNA-templated;GO:0008150//biological_process;GO:0009058//biosynthetic process;GO:0034641//cellular nitrogen compound metabolic process;GO:0030154//cell differentiation;GO:0048856//anatomical structure development
ENSDARG00000016375	14.87	6.96	9.725	-	ko01100//Metabolic pathways;ko00250//Alanine, aspartate and glutamate metabolism	-	GO:0004066//asparagine synthase (glutamine-hydrolyzing) activity;GO:0003674//molecular_function;GO:0016874//ligase activity	GO:0006529//asparagine biosynthetic process;GO:0070981//L-asparagine biosynthetic process;GO:0008152//metabolic process;GO:0008150//biological_process;GO:0006520//cellular amino acid metabolic process;GO:0009058//biosynthetic process;GO:0034641//cellular nitrogen compound metabolic process;GO:0044281//small molecule metabolic process
ENSDARG00000016391	0.15	4.97	3.375	calcium binding and coiled-coil domain 1b [Source:ZFIN;Acc:ZDB-GENE-031118-126]	-	GO:0005575//cellular_component;GO:0005575//cellular_component	GO:0003746//translation elongation factor activity;GO:0003674//molecular_function;GO:0003723//RNA binding;GO:0008135//translation factor activity, nucleic acid binding	GO:0006412//translation;GO:0006414//translational elongation;GO:0008150//biological_process;GO:0009058//biosynthetic process
ENSDARG00000016412	49.66	56.18	17.99	angiotensinogen [Source:ZFIN;Acc:ZDB-GENE-030131-1205]	ko04614//Renin-angiotensin system	GO:0005615//extracellular space;GO:0005575//cellular_component;GO:0005576//extracellular region;GO:0005615//extracellular space	GO:0004867//serine-type endopeptidase inhibitor activity;GO:0003674//molecular_function;GO:0030234//enzyme regulator activity	GO:0010951//negative regulation of endopeptidase activity;GO:0003081//regulation of systemic arterial blood pressure by renin-angiotensin;GO:0003013;GO:0008150//biological_process
ENSDARG00000016421	0.185	0.185	12.185	-	-	-	-	-
ENSDARG00000016429	11.64	8.905	5.215	FERM, RhoGEF and pleckstrin domain protein 2 [Source:ZFIN;Acc:ZDB-GENE-030131-2993]	ko04520//Adherens junction	GO:0005575//cellular_component;GO:0005622//intracellular;GO:0005623//cell;GO:0005856//cytoskeleton;GO:0043226//organelle;GO:0005737//cytoplasm	GO:0003674//molecular_function	GO:0008150//biological_process
ENSDARG00000016439	2.2	3.97	4.42	solute carrier family 7 (cationic amino acid transporter, y+ system), member 1 [Source:ZFIN;Acc:ZDB-GENE-091116-69]	-	GO:0005575//cellular_component;GO:0005623//cell;GO:0005886//plasma membrane	GO:0003674//molecular_function;GO:0022857//transmembrane transporter activity	GO:0006810//transport;GO:0008150//biological_process;GO:0055085//transmembrane transport
ENSDARG00000016463	21.905	14.675	10.065	-	-	-	-	-
ENSDARG00000016479	1.83	1.995	4.195	UDP glucuronosyltransferase 5 family, polypeptide A1 [Source:ZFIN;Acc:ZDB-GENE-051120-60]	-	GO:0043231//intracellular membrane-bounded organelle;GO:0005575//cellular_component;GO:0005622//intracellular;GO:0005623//cell;GO:0043226//organelle	GO:0015020//glucuronosyltransferase activity;GO:0016740//transferase activity;GO:0016757//transferase activity, transferring glycosyl groups;GO:0016758//transferase activity, transferring hexosyl groups;GO:0003674//molecular_function	GO:0052696//flavonoid glucuronidation;GO:0032870//cellular response to hormone stimulus;GO:0009813//flavonoid biosynthetic process;GO:0008152//metabolic process;GO:0008150//biological_process;GO:0009058//biosynthetic process;GO:0005975//carbohydrate metabolic process;GO:0044281//small molecule metabolic process
ENSDARG00000016483	1.935	5.57	7.205	BAI1-associated protein 2-like 2a [Source:ZFIN;Acc:ZDB-GENE-040108-10]	-	GO:0005575//cellular_component;GO:0005622//intracellular;GO:0005623//cell;GO:0005737//cytoplasm;GO:0005829//cytosol;GO:0005634//nucleus;GO:0005654//nucleoplasm;GO:0043226//organelle;GO:0005856//cytoskeleton	GO:0003674//molecular_function;GO:0008092//cytoskeletal protein binding;GO:0030674//protein binding, bridging	GO:0008150//biological_process;GO:0007165//signal transduction;GO:0007009//plasma membrane organization;GO:0061024//membrane organization;GO:0007010//cytoskeleton organization
ENSDARG00000016484	61.425	29.135	42.145	-	ko03008//Ribosome biogenesis in eukaryotes	GO:0031429//box H/ACA snoRNP complex;GO:0005575//cellular_component;GO:0005622//intracellular;GO:0005623//cell;GO:0005634//nucleus;GO:0005730//nucleolus;GO:0043226//organelle	GO:0003723//RNA binding;GO:0009982//pseudouridine synthase activity;GO:0003674//molecular_function;GO:0016853//isomerase activity	GO:0060216//definitive hemopoiesis;GO:0006396//RNA processing;GO:0006364//rRNA processing;GO:0009451//RNA modification;GO:0001522//pseudouridine synthesis;GO:0000495//box H/ACA snoRNA 3'-end processing;GO:0031118//rRNA pseudouridine synthesis;GO:0031120//snRNA pseudouridine synthesis;GO:0008150//biological_process;GO:0034641//cellular nitrogen compound metabolic process;GO:0042254//ribosome bioge…
ENSDARG00000016494	2.595	8.495	13.245	dopa decarboxylase [Source:ZFIN;Acc:ZDB-GENE-040426-2656]	ko01100//Metabolic pathways;ko00380//Tryptophan metabolism;ko00350//Tyrosine metabolism;ko00340//Histidine metabolism;ko00360//Phenylalanine metabolism	GO:0005575//cellular_component;GO:0005575//cellular_component	GO:0016829//lyase activity;GO:0016831//carboxy-lyase activity;GO:0030170//pyridoxal phosphate binding;GO:0003824//catalytic activity;GO:0003674//molecular_function;GO:0043167//ion binding	GO:0007420//brain development;GO:0019752//carboxylic acid metabolic process;GO:0006520//cellular amino acid metabolic process;GO:0008150//biological_process;GO:0044281//small molecule metabolic process;GO:0048856//anatomical structure development
ENSDARG00000016496	17.545	8.98	6.805	-	-	-	-	-
ENSDARG00000016514	8.605	5.205	4.21	general transcription factor IIH, polypeptide 2 [Source:ZFIN;Acc:ZDB-GENE-030131-1959]	ko03420//Nucleotide excision repair;ko03022//Basal transcription factors	GO:0000439//core TFIIH complex;GO:0005575//cellular_component;GO:0005622//intracellular;GO:0005623//cell;GO:0005634//nucleus;GO:0043226//organelle;GO:0043234//protein complex	GO:0046872//metal ion binding;GO:0008270//zinc ion binding;GO:0003674//molecular_function;GO:0043167//ion binding	GO:0006289//nucleotide-excision repair;GO:0006351//transcription, DNA-templated;GO:0006281//DNA repair;GO:0006259//DNA metabolic process;GO:0006950//response to stress;GO:0008150//biological_process;GO:0034641//cellular nitrogen compound metabolic process;GO:0009058//biosynthetic process
ENSDARG00000016527	0.03	0.095	0.4	-	-	-	GO:0003674//molecular_function;GO:0043167//ion binding	-
ENSDARG00000016536	1.96	5.55	3.01	neuronal PAS domain protein 2 [Source:ZFIN;Acc:ZDB-GENE-030408-3]	-	GO:0005667//transcription factor complex;GO:0005737//cytoplasm;GO:0005634//nucleus;GO:0005575//cellular_component;GO:0005622//intracellular;GO:0005623//cell;GO:0043226//organelle;GO:0043234//protein complex	GO:0003690//double-stranded DNA binding;GO:0003700//sequence-specific DNA binding transcription factor activity;GO:0003677//DNA binding;GO:0004871//signal transducer activity;GO:0046983//protein dimerization activity;GO:0003674//molecular_function;GO:0001071//nucleic acid binding transcription factor activity	GO:0009648//photoperiodism;GO:0006351//transcription, DNA-templated;GO:0006355//regulation of transcription, DNA-templated;GO:0007623//circadian rhythm;GO:0007165//signal transduction;GO:0009416//response to light stimulus;GO:0008150//biological_process;GO:0009058//biosynthetic process;GO:0034641//cellular nitrogen compound metabolic process
ENSDARG00000016570	2.705	2.9	8.93	-	ko04080//Neuroactive ligand-receptor interaction;ko04060//Cytokine-cytokine receptor interaction;ko04630//Jak-STAT signaling pathway	GO:0016020//membrane;GO:0005575//cellular_component	GO:0004896//cytokine receptor activity;GO:0003674//molecular_function;GO:0004871//signal transducer activity	-
ENSDARG00000016594	5.01	5.685	1.52	HAUS augmin-like complex, subunit 4 [Source:ZFIN;Acc:ZDB-GENE-040718-122]	-	GO:0070652//HAUS complex;GO:0005575//cellular_component;GO:0005622//intracellular;GO:0005623//cell;GO:0005856//cytoskeleton;GO:0043226//organelle;GO:0043234//protein complex	GO:0003674//molecular_function;GO:0003674//molecular_function	GO:0051225//spindle assembly;GO:0051297//centrosome organization;GO:0007010//cytoskeleton organization;GO:0008150//biological_process;GO:0006461//protein complex assembly;GO:0007049//cell cycle;GO:0022607//cellular component assembly;GO:0065003
ENSDARG00000016623	15.965	13.415	32.425	-	-	GO:0005575//cellular_component;GO:0005575//cellular_component	GO:0016740//transferase activity;GO:0005524//ATP binding;GO:0035091//phosphatidylinositol binding;GO:0004672//protein kinase activity;GO:0016301//kinase activity;GO:0000166//nucleotide binding;GO:0004674//protein serine/threonine kinase activity;GO:0016772//transferase activity, transferring phosphorus-containing groups;GO:0003674//molecular_function;GO:0008289//lipid binding;GO:0043167//ion bind…	GO:0006468//protein phosphorylation;GO:0016310//phosphorylation;GO:0008150//biological_process;GO:0006464//cellular protein modification process
ENSDARG00000016656	8.7	6.975	2.585	mitochondrial genome maintenance exonuclease 1 [Source:ZFIN;Acc:ZDB-GENE-041212-68]	-	GO:0005739//mitochondrion;GO:0005575//cellular_component;GO:0005622//intracellular;GO:0005623//cell;GO:0005737//cytoplasm;GO:0043226//organelle	GO:0004518//nuclease activity;GO:0008297//single-stranded DNA exodeoxyribonuclease activity;GO:0043765//T/G mismatch-specific endonuclease activity;GO:0004527//exonuclease activity;GO:0016787//hydrolase activity;GO:0042578//phosphoric ester hydrolase activity;GO:0003674//molecular_function	GO:0006264//mitochondrial DNA replication;GO:0000738//DNA catabolic process, exonucleolytic;GO:0043504//mitochondrial DNA repair;GO:0006259//DNA metabolic process;GO:0006950//response to stress;GO:0007005//mitochondrion organization;GO:0008150//biological_process;GO:0034641//cellular nitrogen compound metabolic process;GO:0009056//catabolic process;GO:0034655;GO:0009058//biosynthetic process
ENSDARG00000016706	74.72	31.2	23.59	5-aminoimidazole-4-carboxamide ribonucleotide formyltransferase/IMP cyclohydrolase [Source:ZFIN;Acc:ZDB-GENE-011212-4]	ko01100//Metabolic pathways;ko00230//Purine metabolism;ko00670//One carbon pool by folate	-	GO:0004643//phosphoribosylaminoimidazolecarboxamide formyltransferase activity;GO:0003824//catalytic activity;GO:0003937//IMP cyclohydrolase activity;GO:0003674//molecular_function;GO:0016810//hydrolase activity, acting on carbon-nitrogen (but not peptide) bonds	GO:0006164//purine nucleotide biosynthetic process;GO:0008150//biological_process;GO:0009058//biosynthetic process;GO:0034641//cellular nitrogen compound metabolic process;GO:0044281//small molecule metabolic process
ENSDARG00000016718	8.72	2.62	0.755	matrix metallopeptidase 11b [Source:ZFIN;Acc:ZDB-GENE-070817-2]	-	GO:0005575//cellular_component	GO:0003674//molecular_function;GO:0043167//ion binding;GO:0008233//peptidase activity	GO:0008150//biological_process
ENSDARG00000016725	25.69	14.945	6.88	growth arrest and DNA-damage-inducible, gamma b, tandem duplicate 1 [Source:ZFIN;Acc:ZDB-GENE-040426-2321]	-	GO:0005634//nucleus;GO:0005575//cellular_component;GO:0005622//intracellular;GO:0005623//cell;GO:0043226//organelle	GO:0003674//molecular_function;GO:0003674//molecular_function	GO:0006950//response to stress;GO:0051726//regulation of cell cycle;GO:0008150//biological_process
ENSDARG00000016733	38.635	18.955	8.245	phosphoserine aminotransferase 1 [Source:ZFIN;Acc:ZDB-GENE-030131-5723]	ko01100//Metabolic pathways;ko00260//Glycine, serine and threonine metabolism;ko00750//Vitamin B6 metabolism	-	GO:0003824//catalytic activity;GO:0008483//transaminase activity;GO:0030170//pyridoxal phosphate binding;GO:0016740//transferase activity;GO:0004648//O-phospho-L-serine:2-oxoglutarate aminotransferase activity;GO:0003674//molecular_function;GO:0043167//ion binding	GO:0006564//L-serine biosynthetic process;GO:0008152//metabolic process;GO:0008652//cellular amino acid biosynthetic process;GO:0006520//cellular amino acid metabolic process;GO:0008150//biological_process;GO:0009058//biosynthetic process;GO:0044281//small molecule metabolic process
ENSDARG00000016750	0.305	0.81	0.68	ATP-binding cassette, sub-family C (CFTR/MRP), member 6a [Source:ZFIN;Acc:ZDB-GENE-050517-18]	-	GO:0005575//cellular_component	GO:0003674//molecular_function;GO:0016887//ATPase activity;GO:0022857//transmembrane transporter activity;GO:0043167//ion binding	GO:0006810//transport;GO:0008150//biological_process;GO:0055085//transmembrane transport;GO:0009790//embryo development;GO:0048856//anatomical structure development
ENSDARG00000016754	184.765	88.065	93.335	tubulin cofactor a [Source:ZFIN;Acc:ZDB-GENE-040426-962]	-	-	GO:0051082//unfolded protein binding;GO:0015631//tubulin binding;GO:0003674//molecular_function;GO:0008092//cytoskeletal protein binding	GO:0007021//tubulin complex assembly;GO:0006461//protein complex assembly;GO:0008150//biological_process;GO:0022607//cellular component assembly;GO:0065003
ENSDARG00000016789	0.09	0.25	0.51	zgc:152891 [Source:ZFIN;Acc:ZDB-GENE-061013-229]	-	GO:0005575//cellular_component;GO:0005575//cellular_component	GO:0046872//metal ion binding;GO:0016702//oxidoreductase activity, acting on single donors with incorporation of molecular oxygen, incorporation of two atoms of oxygen;GO:0005506//iron ion binding;GO:0051213//dioxygenase activity;GO:0016165//linoleate 13S-lipoxygenase activity;GO:0016491//oxidoreductase activity;GO:0003674//molecular_function;GO:0043167//ion binding	GO:0055114//oxidation-reduction process;GO:0008150//biological_process
ENSDARG00000016830	46.77	73.525	33.81	ribosomal modification protein rimK-like family member A [Source:ZFIN;Acc:ZDB-GENE-040912-20]	-	GO:0005575//cellular_component;GO:0005622//intracellular;GO:0005623//cell;GO:0005737//cytoplasm	GO:0003674//molecular_function;GO:0016874//ligase activity;GO:0043167//ion binding	GO:0006464//cellular protein modification process;GO:0008150//biological_process
ENSDARG00000016855	117.985	56.315	46.255	-	-	-	-	-
ENSDARG00000016856	22.62	18.26	11.01	paraoxonase 2 [Source:ZFIN;Acc:ZDB-GENE-030131-7116]	-	GO:0005575//cellular_component;GO:0005575//cellular_component	GO:0004064//arylesterase activity;GO:0003674//molecular_function	-
ENSDARG00000016858	11.72	15.965	7.695	-	ko04144//Endocytosis;ko04350//TGF-beta signaling pathway	GO:0005634//nucleus;GO:0005622//intracellular;GO:0005737//cytoplasm;GO:0005667//transcription factor complex;GO:0005575//cellular_component;GO:0005623//cell;GO:0043234//protein complex;GO:0043226//organelle	GO:0003677//DNA binding;GO:0003700//sequence-specific DNA binding transcription factor activity;GO:0001071//nucleic acid binding transcription factor activity;GO:0003674//molecular_function	GO:0006355//regulation of transcription, DNA-templated;GO:0007179//transforming growth factor beta receptor signaling pathway;GO:0006351//transcription, DNA-templated;GO:0008150//biological_process;GO:0009058//biosynthetic process;GO:0034641//cellular nitrogen compound metabolic process;GO:0007165//signal transduction
ENSDARG00000016867	21.875	39.25	50.6	-	-	-	GO:0008270//zinc ion binding;GO:0046872//metal ion binding;GO:0003674//molecular_function;GO:0043167//ion binding	-
ENSDARG00000016868	1.665	4.095	3.75	-	ko04120//Ubiquitin mediated proteolysis	-	-	-
ENSDARG00000016871	108.755	70.88	49.315	SWI/SNF related, matrix associated, actin dependent regulator of chromatin, subfamily e, member 1 [Source:ZFIN;Acc:ZDB-GENE-030131-967]	-	GO:0016514//SWI/SNF complex;GO:0005634//nucleus;GO:0005575//cellular_component;GO:0005622//intracellular;GO:0005623//cell;GO:0005634//nucleus;GO:0043226//organelle;GO:0043234//protein complex	GO:0003682//chromatin binding;GO:0003674//molecular_function	GO:0006338//chromatin remodeling;GO:0043044//ATP-dependent chromatin remodeling;GO:0006355//regulation of transcription, DNA-templated;GO:0008150//biological_process;GO:0051276//chromosome organization
ENSDARG00000016886	2.795	1.6	5.465	DnaJ (Hsp40) homolog, subfamily B, member 9b [Source:ZFIN;Acc:ZDB-GENE-050522-76]	-	GO:0005575//cellular_component;GO:0005575//cellular_component	-	-
ENSDARG00000016918	23.855	90.47	177.695	-	ko04974//Protein digestion and absorption;ko04614//Renin-angiotensin system	GO:0016020//membrane;GO:0005575//cellular_component	GO:0004180//carboxypeptidase activity;GO:0008237//metallopeptidase activity;GO:0016787//hydrolase activity;GO:0008241//peptidyl-dipeptidase activity;GO:0046872//metal ion binding;GO:0008233//peptidase activity;GO:0003674//molecular_function;GO:0043167//ion binding	GO:0006508//proteolysis;GO:0008150//biological_process
ENSDARG00000016936	3.955	2.195	0.65	hemicentin 1 [Source:ZFIN;Acc:ZDB-GENE-041014-322]	-	GO:0005576//extracellular region;GO:0005575//cellular_component	GO:0005509//calcium ion binding;GO:0003674//molecular_function;GO:0043167//ion binding	GO:0033333//fin development;GO:0071711//basement membrane organization;GO:0033334//fin morphogenesis;GO:0008150//biological_process;GO:0048856//anatomical structure development;GO:0030198//extracellular matrix organization
ENSDARG00000016939	1.36	2.745	2.53	integrin, beta 2 [Source:ZFIN;Acc:ZDB-GENE-110411-4]	ko04810//Regulation of actin cytoskeleton;ko05152//Tuberculosis;ko04670//Leukocyte transendothelial migration;ko04145//Phagosome;ko05146//Amoebiasis;ko04514//Cell adhesion molecules (CAMs);ko04650//Natural killer cell mediated cytotoxicity;ko05323//Rheumatoid arthritis;ko05140//Leishmaniasis;ko05133//Pertussis;ko05416//Viral myocarditis;ko05144//Malaria;ko05150//Staphylococcus aureus infection	GO:0005575//cellular_component;GO:0005623//cell;GO:0005886//plasma membrane;GO:0043234//protein complex	GO:0003674//molecular_function	GO:0007155//cell adhesion;GO:0008150//biological_process;GO:0007165//signal transduction
ENSDARG00000016999	1.695	0.455	0.115	-	-	GO:0005575//cellular_component;GO:0005622//intracellular;GO:0005623//cell;GO:0005737//cytoplasm;GO:0043226//organelle;GO:0005634//nucleus	GO:0003674//molecular_function;GO:0043167//ion binding;GO:0003723//RNA binding	GO:0008150//biological_process;GO:0009790//embryo development;GO:0048856//anatomical structure development;GO:0034641//cellular nitrogen compound metabolic process;GO:0008283//cell proliferation;GO:0030154//cell differentiation;GO:0009056//catabolic process;GO:0034655
ENSDARG00000017007	5.79	3.765	2.61	-	-	-	-	-
ENSDARG00000017036	5.955	8.015	12.52	-	-	-	-	-
ENSDARG00000017047	6.165	12.245	16.755	solute carrier family 27 (fatty acid transporter), member 4 [Source:ZFIN;Acc:ZDB-GENE-050417-248]	ko03320//PPAR signaling pathway;ko04975//Fat digestion and absorption	GO:0016021//integral component of membrane;GO:0005575//cellular_component	GO:0003824//catalytic activity;GO:0004467//long-chain fatty acid-CoA ligase activity;GO:0031957//very long-chain fatty acid-CoA ligase activity;GO:0003674//molecular_function;GO:0016874//ligase activity	GO:0015908//fatty acid transport;GO:0008152//metabolic process;GO:0008150//biological_process;GO:0006810//transport
ENSDARG00000017084	69.23	40.47	30.285	-	-	-	-	-
ENSDARG00000017108	0.885	1.335	2.975	-	-	-	-	-
ENSDARG00000017154	2.085	2.525	4.255	-	-	-	-	-
ENSDARG00000017165	1.87	4.685	8.54	-	-	-	-	-
ENSDARG00000017168	4.86	2.625	1.695	nuclear receptor subfamily 2, group F, member 1b [Source:ZFIN;Acc:ZDB-GENE-040426-1438]	-	GO:0005575//cellular_component;GO:0005622//intracellular;GO:0005623//cell;GO:0005634//nucleus;GO:0043226//organelle	GO:0003674//molecular_function;GO:0003677//DNA binding;GO:0043167//ion binding;GO:0004871//signal transducer activity;GO:0001071//nucleic acid binding transcription factor activity	GO:0008150//biological_process;GO:0007165//signal transduction;GO:0009058//biosynthetic process;GO:0034641//cellular nitrogen compound metabolic process
ENSDARG00000017193	1.065	9.205	3.15	calponin 1, basic, smooth muscle, a [Source:ZFIN;Acc:ZDB-GENE-090312-141]	-	-	GO:0003779//actin binding;GO:0005516//calmodulin binding;GO:0003674//molecular_function;GO:0008092//cytoskeletal protein binding	GO:0031032//actomyosin structure organization;GO:0007010//cytoskeleton organization;GO:0008150//biological_process
ENSDARG00000017195	7.555	5.79	3.275	forkhead box F2a [Source:ZFIN;Acc:ZDB-GENE-110407-5]	-	GO:0005634//nucleus;GO:0005575//cellular_component;GO:0005622//intracellular;GO:0005623//cell;GO:0005634//nucleus;GO:0043226//organelle	GO:0003700//sequence-specific DNA binding transcription factor activity;GO:0003677//DNA binding;GO:0003705//RNA polymerase II distal enhancer sequence-specific DNA binding transcription factor activity;GO:0043565//sequence-specific DNA binding;GO:0003674//molecular_function;GO:0001071//nucleic acid binding transcription factor activity	GO:0006351//transcription, DNA-templated;GO:0030154//cell differentiation;GO:0006355//regulation of transcription, DNA-templated;GO:0006357//regulation of transcription from RNA polymerase II promoter;GO:0009653//anatomical structure morphogenesis;GO:0008150//biological_process;GO:0048856//anatomical structure development;GO:0030154//cell differentiation;GO:0009058//biosynthetic process;GO:003464…
ENSDARG00000017199	6.68	2.985	5.82	-	-	-	-	-
ENSDARG00000017234	0.235	0.235	1.635	-	ko04080//Neuroactive ligand-receptor interaction	GO:0016021//integral component of membrane;GO:0016020//membrane;GO:0005575//cellular_component	GO:0004871//signal transducer activity;GO:0004930//G-protein coupled receptor activity;GO:0042923//neuropeptide binding;GO:0004983//neuropeptide Y receptor activity;GO:0003674//molecular_function	GO:0007186//G-protein coupled receptor signaling pathway;GO:0007218//neuropeptide signaling pathway;GO:0007165//signal transduction;GO:0008150//biological_process
ENSDARG00000017246	1.415	3.62	7.71	-	-	-	-	-
ENSDARG00000017251	5.085	1.7	2.09	somatolactin beta [Source:ZFIN;Acc:ZDB-GENE-060123-1]	-	GO:0005576//extracellular region;GO:0005575//cellular_component	GO:0005179//hormone activity;GO:0003674//molecular_function	GO:0043434//response to peptide hormone;GO:0051877//pigment granule aggregation in cell center;GO:0008150//biological_process;GO:0043473//pigmentation
ENSDARG00000017254	1.96	2.7	4.515	-	-	GO:0005575//cellular_component;GO:0005623//cell;GO:0005886//plasma membrane	GO:0003674//molecular_function;GO:0022857//transmembrane transporter activity	GO:0006810//transport;GO:0008150//biological_process;GO:0055085//transmembrane transport
ENSDARG00000017299	210.85	117.88	62.975	fatty acid binding protein 11a [Source:ZFIN;Acc:ZDB-GENE-040912-132]	-	GO:0005575//cellular_component;GO:0005575//cellular_component	GO:0005215//transporter activity;GO:0008289//lipid binding;GO:0003674//molecular_function	GO:0006810//transport;GO:0008150//biological_process
ENSDARG00000017311	19.38	13.67	5.58	G-protein signaling modulator 2 [Source:ZFIN;Acc:ZDB-GENE-040426-1169]	-	-	GO:0030695//GTPase regulator activity;GO:0005092//GDP-dissociation inhibitor activity;GO:0003674//molecular_function;GO:0030234//enzyme regulator activity	GO:0008277//regulation of G-protein coupled receptor protein signaling pathway;GO:0008150//biological_process
ENSDARG00000017314	627.895	6859.27	13966.5	-	-	GO:0005575//cellular_component;GO:0005575//cellular_component	GO:0016787//hydrolase activity;GO:0008236//serine-type peptidase activity;GO:0004252//serine-type endopeptidase activity;GO:0008233//peptidase activity;GO:0003674//molecular_function	GO:0006508//proteolysis;GO:0008150//biological_process
ENSDARG00000017329	9.325	6.325	3.71	-	-	-	-	-
ENSDARG00000017391	2.3	1.495	3.8	-	-	-	-	-
ENSDARG00000017400	0.665	1.525	1.49	Kruppel-like factor 1 (erythroid) [Source:ZFIN;Acc:ZDB-GENE-980526-55]	-	GO:0005634//nucleus;GO:0005575//cellular_component;GO:0005622//intracellular;GO:0005623//cell;GO:0005634//nucleus;GO:0043226//organelle	GO:0003700//sequence-specific DNA binding transcription factor activity;GO:0046872//metal ion binding;GO:0043565//sequence-specific DNA binding;GO:0003676//nucleic acid binding;GO:0003674//molecular_function;GO:0003677//DNA binding;GO:0043167//ion binding;GO:0001071//nucleic acid binding transcription factor activity	GO:0010628//positive regulation of gene expression;GO:0060319//primitive erythrocyte differentiation;GO:0002376//immune system process;GO:0008150//biological_process;GO:0009790//embryo development;GO:0030154//cell differentiation;GO:0042592//homeostatic process;GO:0048856//anatomical structure development
ENSDARG00000017444	15.075	22.425	7.79	-	ko01100//Metabolic pathways;ko00340//Histidine metabolism	GO:0005737//cytoplasm;GO:0005575//cellular_component;GO:0005622//intracellular;GO:0005623//cell	GO:0016841//ammonia-lyase activity;GO:0016829//lyase activity;GO:0003824//catalytic activity;GO:0004397//histidine ammonia-lyase activity;GO:0003674//molecular_function	GO:0019556//histidine catabolic process to glutamate and formamide;GO:0019557//histidine catabolic process to glutamate and formate;GO:0006548//histidine catabolic process;GO:0006547//histidine metabolic process;GO:0009058//biosynthetic process;GO:0008150//biological_process;GO:0006520//cellular amino acid metabolic process;GO:0034641//cellular nitrogen compound metabolic process;GO:0044281//smal…
ENSDARG00000017489	6.11	17.285	6.5	zgc:123068 [Source:ZFIN;Acc:ZDB-GENE-051030-98]	-	GO:0016021//integral component of membrane;GO:0005575//cellular_component	GO:0003674//molecular_function;GO:0003674//molecular_function	GO:0008150//biological_process;GO:0008150//biological_process
ENSDARG00000017490	35.975	386.795	1097.54	carboxyl ester lipase, tandem duplicate 1 [Source:ZFIN;Acc:ZDB-GENE-030131-1201]	ko01100//Metabolic pathways;ko04972//Pancreatic secretion;ko00561//Glycerolipid metabolism;ko04975//Fat digestion and absorption;ko00100//Steroid biosynthesis	GO:0005615//extracellular space;GO:0005575//cellular_component;GO:0005576//extracellular region;GO:0005615//extracellular space	GO:0016787//hydrolase activity;GO:0052689//carboxylic ester hydrolase activity;GO:0004104//cholinesterase activity;GO:0003674//molecular_function	-
ENSDARG00000017532	3.21	2.82	1.335	kinesin family member 25 [Source:ZFIN;Acc:ZDB-GENE-041001-167]	-	GO:0005575//cellular_component;GO:0005622//intracellular;GO:0005623//cell;GO:0005856//cytoskeleton;GO:0043226//organelle;GO:0043234//protein complex	GO:0003674//molecular_function;GO:0008092//cytoskeletal protein binding	GO:0008150//biological_process
ENSDARG00000017565	0.001	0.125	0.295	IL2-inducible T-cell kinase [Source:ZFIN;Acc:ZDB-GENE-990415-261]	-	GO:0031234//extrinsic component of cytoplasmic side of plasma membrane;GO:0005575//cellular_component;GO:0005622//intracellular;GO:0005623//cell;GO:0005886//plasma membrane	GO:0004715//non-membrane spanning protein tyrosine kinase activity;GO:0016740//transferase activity;GO:0005524//ATP binding;GO:0004672//protein kinase activity;GO:0004713//protein tyrosine kinase activity;GO:0016301//kinase activity;GO:0000166//nucleotide binding;GO:0016772//transferase activity, transferring phosphorus-containing groups;GO:0003674//molecular_function;GO:0043167//ion binding;GO:0…	GO:0042127//regulation of cell proliferation;GO:0007169//transmembrane receptor protein tyrosine kinase signaling pathway;GO:0006468//protein phosphorylation;GO:0001865//NK T cell differentiation;GO:0002250//adaptive immune response;GO:0038083//peptidyl-tyrosine autophosphorylation;GO:0035556//intracellular signal transduction;GO:0016310//phosphorylation;GO:0045087//innate immune response;GO:0050…
ENSDARG00000017605	4.775	2.12	3.705	ribonuclease P/MRP 40 subunit [Source:ZFIN;Acc:ZDB-GENE-040625-161]	ko03013//RNA transport;ko03008//Ribosome biogenesis in eukaryotes	GO:0005575//cellular_component;GO:0005575//cellular_component	GO:0003674//molecular_function;GO:0003674//molecular_function	GO:0008150//biological_process;GO:0008150//biological_process
ENSDARG00000017615	1.21	0.97	0.34	-	-	GO:0005634//nucleus;GO:0005575//cellular_component;GO:0005622//intracellular;GO:0005623//cell;GO:0043226//organelle	GO:0003677//DNA binding;GO:0043565//sequence-specific DNA binding;GO:0003674//molecular_function	GO:0006355//regulation of transcription, DNA-templated;GO:0008150//biological_process
ENSDARG00000017624	5439.77	2937.18	2709.94	keratin 4 [Source:ZFIN;Acc:ZDB-GENE-000607-83]	-	GO:0045095//keratin filament;GO:0005882//intermediate filament;GO:0005575//cellular_component;GO:0005622//intracellular;GO:0005623//cell;GO:0005856//cytoskeleton;GO:0043226//organelle;GO:0043234//protein complex	GO:0005198//structural molecule activity;GO:0003674//molecular_function	-
ENSDARG00000017634	61.025	25.705	36.77	phosducin b [Source:ZFIN;Acc:ZDB-GENE-031023-2]	-	GO:0005575//cellular_component;GO:0005575//cellular_component	-	-
ENSDARG00000017653	0.42	1.33	1.49	regulator of G-protein signaling 13 [Source:ZFIN;Acc:ZDB-GENE-070410-138]	-	GO:0005886//plasma membrane;GO:0005737//cytoplasm;GO:0005575//cellular_component;GO:0005622//intracellular;GO:0005623//cell;GO:0005737//cytoplasm;GO:0005886//plasma membrane	GO:0005096//GTPase activator activity;GO:0003674//molecular_function;GO:0030234//enzyme regulator activity	GO:0038032//termination of G-protein coupled receptor signaling pathway;GO:0008150//biological_process
ENSDARG00000017665	3.65	6.065	8.25	SNF related kinase b [Source:ZFIN;Acc:ZDB-GENE-040426-1724]	-	GO:0005737//cytoplasm;GO:0005634//nucleus;GO:0005575//cellular_component;GO:0005622//intracellular;GO:0005623//cell;GO:0005634//nucleus;GO:0043226//organelle;GO:0005737//cytoplasm	GO:0000166//nucleotide binding;GO:0004672//protein kinase activity;GO:0005524//ATP binding;GO:0004674//protein serine/threonine kinase activity;GO:0016772//transferase activity, transferring phosphorus-containing groups;GO:0003674//molecular_function;GO:0016301//kinase activity;GO:0043167//ion binding	GO:0006468//protein phosphorylation;GO:0060217//hemangioblast cell differentiation;GO:0035556//intracellular signal transduction;GO:0007165//signal transduction;GO:0008150//biological_process;GO:0002376//immune system process;GO:0009790//embryo development;GO:0030154//cell differentiation;GO:0048646//anatomical structure formation involved in morphogenesis;GO:0048856//anatomical structure develop…
ENSDARG00000017676	67.44	72.655	26.43	matrix metallopeptidase 2 [Source:ZFIN;Acc:ZDB-GENE-030131-9123]	ko05200//Pathways in cancer;ko04670//Leukocyte transendothelial migration;ko04912//GnRH signaling pathway;ko05219//Bladder cancer	GO:0031012//extracellular matrix;GO:0005575//cellular_component	GO:0016787//hydrolase activity;GO:0008233//peptidase activity;GO:0004222//metalloendopeptidase activity;GO:0008237//metallopeptidase activity;GO:0008270//zinc ion binding;GO:0046872//metal ion binding;GO:0003674//molecular_function;GO:0043167//ion binding	GO:0031290//retinal ganglion cell axon guidance;GO:0006508//proteolysis;GO:0001945//lymph vessel development;GO:0008150//biological_process;GO:0048856//anatomical structure development;GO:0000902//cell morphogenesis;GO:0030154//cell differentiation;GO:0040011//locomotion
ENSDARG00000017681	6.07	4.845	2.54	-	-	-	GO:0016740//transferase activity;GO:0005524//ATP binding;GO:0016772//transferase activity, transferring phosphorus-containing groups;GO:0004672//protein kinase activity;GO:0016301//kinase activity;GO:0000166//nucleotide binding;GO:0004674//protein serine/threonine kinase activity;GO:0004707//MAP kinase activity;GO:0003674//molecular_function;GO:0004871//signal transducer activity;GO:0043167//ion …	GO:0006468//protein phosphorylation;GO:0009966//regulation of signal transduction;GO:0016310//phosphorylation;GO:0008150//biological_process;GO:0006464//cellular protein modification process
ENSDARG00000017739	5.34	5.92	2.935	adenylate kinase 5, like [Source:ZFIN;Acc:ZDB-GENE-050410-2]	-	GO:0005575//cellular_component;GO:0005575//cellular_component	GO:0019205//nucleobase-containing compound kinase activity;GO:0016740//transferase activity;GO:0005524//ATP binding;GO:0016301//kinase activity;GO:0003674//molecular_function;GO:0043167//ion binding	GO:0016310//phosphorylation;GO:0006139//nucleobase-containing compound metabolic process;GO:0008150//biological_process;GO:0034641//cellular nitrogen compound metabolic process
ENSDARG00000017741	102.855	45.585	44.25	-	-	GO:0005622//intracellular;GO:0005575//cellular_component;GO:0005623//cell	GO:0000166//nucleotide binding;GO:0003676//nucleic acid binding;GO:0003674//molecular_function	GO:0006810//transport;GO:0008150//biological_process
ENSDARG00000017744	13.835	16.635	5.36	structural maintenance of chromosomes 2 [Source:ZFIN;Acc:ZDB-GENE-030131-105]	-	GO:0005694//chromosome;GO:0005634//nucleus;GO:0000796//condensin complex;GO:0005575//cellular_component;GO:0005622//intracellular;GO:0005623//cell;GO:0043226//organelle;GO:0043234//protein complex	GO:0005524//ATP binding;GO:0003674//molecular_function;GO:0043167//ion binding	GO:0051276//chromosome organization;GO:0007076//mitotic chromosome condensation;GO:0006259//DNA metabolic process;GO:0007049//cell cycle;GO:0007059//chromosome segregation;GO:0007067//mitosis;GO:0008150//biological_process;GO:0034641//cellular nitrogen compound metabolic process
ENSDARG00000017780	2.285	18.915	1.855	RAR-related orphan receptor C b [Source:ZFIN;Acc:ZDB-GENE-040724-215]	-	GO:0005634//nucleus;GO:0005575//cellular_component;GO:0005622//intracellular;GO:0005623//cell;GO:0043226//organelle	GO:0003677//DNA binding;GO:0003700//sequence-specific DNA binding transcription factor activity;GO:0003707//steroid hormone receptor activity;GO:0008270//zinc ion binding;GO:0046872//metal ion binding;GO:0043565//sequence-specific DNA binding;GO:0004879//ligand-activated sequence-specific DNA binding RNA polymerase II transcription factor activity;GO:0001071//nucleic acid binding transcription fa…	GO:0006355//regulation of transcription, DNA-templated;GO:0043401//steroid hormone mediated signaling pathway;GO:0006351//transcription, DNA-templated;GO:0008150//biological_process;GO:0009058//biosynthetic process;GO:0034641//cellular nitrogen compound metabolic process;GO:0007165//signal transduction
ENSDARG00000017880	5.385	2.905	6.225	Kv channel interacting protein 3b, calsenilin [Source:ZFIN;Acc:ZDB-GENE-040426-1752]	-	-	GO:0046872//metal ion binding;GO:0005509//calcium ion binding;GO:0003674//molecular_function;GO:0043167//ion binding	GO:0031018//endocrine pancreas development;GO:0008150//biological_process;GO:0048856//anatomical structure development
ENSDARG00000017882	18.765	64.47	54.07	retinol dehydrogenase 1 [Source:ZFIN;Acc:ZDB-GENE-030912-15]	-	GO:0005575//cellular_component;GO:0005575//cellular_component	GO:0016491//oxidoreductase activity;GO:0004745//retinol dehydrogenase activity;GO:0003674//molecular_function	GO:0042572//retinol metabolic process;GO:0001501//skeletal system development;GO:0031018//endocrine pancreas development;GO:0035118//embryonic pectoral fin morphogenesis;GO:0031017//exocrine pancreas development;GO:0008152//metabolic process;GO:0042574//retinal metabolic process;GO:0035050//embryonic heart tube development;GO:0030855//epithelial cell differentiation;GO:0008150//biological_process…
ENSDARG00000017884	2.695	6.175	3.88	biglycan a [Source:ZFIN;Acc:ZDB-GENE-040704-74]	-	-	-	GO:0008150//biological_process;GO:0008150//biological_process
ENSDARG00000017905	49.96	40.015	24.87	caspase 3, apoptosis-related cysteine peptidase a [Source:ZFIN;Acc:ZDB-GENE-011210-1]	ko05200//Pathways in cancer;ko04010//MAPK signaling pathway;ko05010//Alzheimer's disease;ko05016//Huntington's disease;ko05152//Tuberculosis;ko05145//Toxoplasmosis;ko05012//Parkinson's disease;ko05146//Amoebiasis;ko04210//Apoptosis;ko05210//Colorectal cancer;ko04650//Natural killer cell mediated cytotoxicity;ko05120//Epithelial cell signaling in Helicobacter pylori infection;ko04115//p53 signalin…	GO:0005737//cytoplasm;GO:0005575//cellular_component;GO:0005622//intracellular;GO:0005623//cell;GO:0005737//cytoplasm	GO:0004197//cysteine-type endopeptidase activity;GO:0008233//peptidase activity;GO:0008234//cysteine-type peptidase activity;GO:0097200//cysteine-type endopeptidase activity involved in execution phase of apoptosis;GO:0016787//hydrolase activity;GO:0003674//molecular_function;GO:0008233//peptidase activity	GO:0006915//apoptotic process;GO:0030182//neuron differentiation;GO:0006508//proteolysis;GO:0071236//cellular response to antibiotic;GO:0030218//erythrocyte differentiation;GO:0097194//execution phase of apoptosis;GO:0048696//regulation of collateral sprouting in absence of injury;GO:0071300//cellular response to retinoic acid;GO:0043065//positive regulation of apoptotic process;GO:0071466//cellu…
ENSDARG00000017910	24.96	11.79	14.235	prenyl (decaprenyl) diphosphate synthase, subunit 1 [Source:ZFIN;Acc:ZDB-GENE-030131-4430]	ko00900//Terpenoid backbone biosynthesis	GO:0005575//cellular_component;GO:0005575//cellular_component	GO:0016740//transferase activity;GO:0003674//molecular_function	GO:0008299//isoprenoid biosynthetic process;GO:0006629//lipid metabolic process;GO:0008150//biological_process;GO:0009058//biosynthetic process
ENSDARG00000017928	4.12	2.18	1.465	-	ko03440//Homologous recombination	-	GO:0005524//ATP binding;GO:0003677//DNA binding;GO:0008094//DNA-dependent ATPase activity;GO:0003674//molecular_function;GO:0016887//ATPase activity;GO:0043167//ion binding	GO:0006281//DNA repair;GO:0006259//DNA metabolic process;GO:0006950//response to stress;GO:0008150//biological_process;GO:0034641//cellular nitrogen compound metabolic process
ENSDARG00000017947	0.615	1.78	0.62	-	-	-	-	-
ENSDARG00000017953	1.11	0.835	0.39	tumor protein p73 [Source:ZFIN;Acc:ZDB-GENE-030814-2]	ko04722//Neurotrophin signaling pathway;ko05162//Measles;ko04115//p53 signaling pathway	GO:0005667//transcription factor complex;GO:0005634//nucleus;GO:0000785//chromatin;GO:0005829//cytosol;GO:0005575//cellular_component;GO:0005622//intracellular;GO:0005623//cell;GO:0005737//cytoplasm;GO:0005829//cytosol;GO:0005694//chromosome;GO:0043226//organelle;GO:0043234//protein complex;GO:0005667//transcription factor complex;GO:0005634//nucleus;GO:0000785//chromatin;GO:0005829//cytosol;GO:0…	GO:0003700//sequence-specific DNA binding transcription factor activity;GO:0003690//double-stranded DNA binding;GO:0003682//chromatin binding;GO:0003677//DNA binding;GO:0003684//damaged DNA binding;GO:0044212//transcription regulatory region DNA binding;GO:0002039//p53 binding;GO:0043565//sequence-specific DNA binding;GO:0003674//molecular_function;GO:0001071//nucleic acid binding transcription f…	GO:0043508//negative regulation of JUN kinase activity;GO:0010332//response to gamma radiation;GO:0042771//intrinsic apoptotic signaling pathway in response to DNA damage by p53 class mediator;GO:0006355//regulation of transcription, DNA-templated;GO:0000122//negative regulation of transcription from RNA polymerase II promoter;GO:0010165//response to X-ray;GO:0034644//cellular response to UV;GO:0…
ENSDARG00000018002	53.225	43.545	24.55	-	ko00071//Fatty acid metabolism	-	GO:0003824//catalytic activity;GO:0003674//molecular_function	GO:0008152//metabolic process;GO:0008150//biological_process
ENSDARG00000018040	1.385	0.545	1.815	-	-	-	-	-
ENSDARG00000018047	3.465	2.81	1.44	-	-	-	-	-
ENSDARG00000018061	4.425	4.19	8.495	nei endonuclease VIII-like 1 (E. coli) [Source:ZFIN;Acc:ZDB-GENE-040426-994]	ko03410//Base excision repair	-	GO:0004519//endonuclease activity;GO:0016799//hydrolase activity, hydrolyzing N-glycosyl compounds;GO:0003684//damaged DNA binding;GO:0003906//DNA-(apurinic or apyrimidinic site) lyase activity;GO:0008270//zinc ion binding;GO:0016787//hydrolase activity;GO:0004518//nuclease activity;GO:0003676//nucleic acid binding;GO:0003674//molecular_function;GO:0043167//ion binding;GO:0016829//lyase activity;…	GO:0006284//base-excision repair;GO:0006289//nucleotide-excision repair;GO:0006259//DNA metabolic process;GO:0006950//response to stress;GO:0008150//biological_process;GO:0034641//cellular nitrogen compound metabolic process
ENSDARG00000018073	33.43	16.045	26.945	mitochondrial ribosomal protein S22 [Source:ZFIN;Acc:ZDB-GENE-070615-31]	-	-	-	GO:0008150//biological_process;GO:0008150//biological_process
ENSDARG00000018165	2.525	2.735	0.63	-	-	-	-	-
ENSDARG00000018263	26.255	68.955	81.46	-	-	-	-	-
ENSDARG00000018266	15.57	7.085	1.5	methylenetetrahydrofolate dehydrogenase (NADP+ dependent) 1a, methenyltetrahydrofolate cyclohydrolase, formyltetrahydrofolate synthetase [Source:ZFIN;Acc:ZDB-GENE-041001-127]	-	GO:0005575//cellular_component;GO:0005622//intracellular;GO:0005623//cell;GO:0005737//cytoplasm;GO:0005829//cytosol	GO:0003674//molecular_function;GO:0016874//ligase activity;GO:0043167//ion binding;GO:0016491//oxidoreductase activity	GO:0006520//cellular amino acid metabolic process;GO:0008150//biological_process;GO:0009058//biosynthetic process;GO:0034641//cellular nitrogen compound metabolic process;GO:0044281//small molecule metabolic process;GO:0051186//cofactor metabolic process
ENSDARG00000018329	0.38	0.95	0.435	guanylyl cyclase 2 [Source:ZFIN;Acc:ZDB-GENE-011128-8]	ko00230//Purine metabolism;ko04744//Phototransduction;ko04740//Olfactory transduction	GO:0016021//integral component of membrane;GO:0016020//membrane;GO:0005575//cellular_component	GO:0016829//lyase activity;GO:0016772//transferase activity, transferring phosphorus-containing groups;GO:0004383//guanylate cyclase activity;GO:0005524//ATP binding;GO:0000166//nucleotide binding;GO:0016849//phosphorus-oxygen lyase activity;GO:0004672//protein kinase activity;GO:0003674//molecular_function;GO:0016301//kinase activity;GO:0043167//ion binding	GO:0006468//protein phosphorylation;GO:0035556//intracellular signal transduction;GO:0006182//cGMP biosynthetic process;GO:0009190//cyclic nucleotide biosynthetic process;GO:0008150//biological_process;GO:0009058//biosynthetic process;GO:0034641//cellular nitrogen compound metabolic process;GO:0044281//small molecule metabolic process;GO:0007165//signal transduction;GO:0006464//cellular protein m…
ENSDARG00000018342	3.64	3.985	11.915	gamma-glutamyltransferase 1b [Source:ZFIN;Acc:ZDB-GENE-110408-13]	-	-	-	GO:0006790//sulfur compound metabolic process;GO:0008150//biological_process;GO:0034641//cellular nitrogen compound metabolic process
ENSDARG00000018351	34.95	70	162.215	-	-	-	-	-
ENSDARG00000018361	3.905	18.225	27.985	-	-	-	-	-
ENSDARG00000018399	12.675	15.075	7.365	-	-	-	-	-
ENSDARG00000018418	1.665	1.51	0.615	parathyroid hormone 1 receptor b [Source:ZFIN;Acc:ZDB-GENE-991123-12]	ko04080//Neuroactive ligand-receptor interaction;ko04961//Endocrine and other factor-regulated calcium reabsorption	GO:0016021//integral component of membrane;GO:0016020//membrane;GO:0005886//plasma membrane;GO:0005575//cellular_component;GO:0005623//cell	GO:0004871//signal transducer activity;GO:0004888//transmembrane signaling receptor activity;GO:0004930//G-protein coupled receptor activity;GO:0017046//peptide hormone binding;GO:0004991//parathyroid hormone receptor activity;GO:0003674//molecular_function	GO:0007165//signal transduction;GO:0007186//G-protein coupled receptor signaling pathway;GO:0007166//cell surface receptor signaling pathway;GO:0008150//biological_process
ENSDARG00000018423	19.57	12.46	8.34	sulfatase 2a [Source:ZFIN;Acc:ZDB-GENE-040426-759]	-	GO:0005783//endoplasmic reticulum;GO:0005794//Golgi apparatus;GO:0009986//cell surface;GO:0005575//cellular_component;GO:0005623//cell;GO:0005622//intracellular;GO:0005737//cytoplasm;GO:0043226//organelle	GO:0005509//calcium ion binding;GO:0008484//sulfuric ester hydrolase activity;GO:0003824//catalytic activity;GO:0003674//molecular_function;GO:0043167//ion binding	GO:0008152//metabolic process;GO:0008150//biological_process
ENSDARG00000018459	27.455	26.545	9.2	-	-	-	-	-
ENSDARG00000018478	65.29	122.12	165.86	alanine-glyoxylate aminotransferase b [Source:ZFIN;Acc:ZDB-GENE-010302-3]	ko01100//Metabolic pathways;ko04146//Peroxisome;ko00260//Glycine, serine and threonine metabolism;ko00250//Alanine, aspartate and glutamate metabolism;ko00630//Glyoxylate and dicarboxylate metabolism	GO:0005739//mitochondrion;GO:0005777//peroxisome;GO:0005575//cellular_component;GO:0005622//intracellular;GO:0005623//cell;GO:0005737//cytoplasm;GO:0005777//peroxisome;GO:0043226//organelle;GO:0005739//mitochondrion	GO:0004760//serine-pyruvate transaminase activity;GO:0030170//pyridoxal phosphate binding;GO:0008453//alanine-glyoxylate transaminase activity;GO:0016740//transferase activity;GO:0003824//catalytic activity;GO:0008483//transaminase activity;GO:0003674//molecular_function;GO:0043167//ion binding	GO:0042866//pyruvate biosynthetic process;GO:0006625//protein targeting to peroxisome;GO:0071391//cellular response to estrogen stimulus;GO:0008152//metabolic process;GO:0046487//glyoxylate metabolic process;GO:0008150//biological_process;GO:0044281//small molecule metabolic process;GO:0006605//protein targeting;GO:0006810//transport;GO:0009058//biosynthetic process
ENSDARG00000018530	3.735	1.27	1.435	mitogen-activated protein kinase-activated protein kinase 2b [Source:ZFIN;Acc:ZDB-GENE-071018-1]	-	GO:0005634//nucleus;GO:0005737//cytoplasm;GO:0005575//cellular_component;GO:0005622//intracellular;GO:0005623//cell;GO:0005737//cytoplasm;GO:0005634//nucleus;GO:0043226//organelle	GO:0016740//transferase activity;GO:0051019//mitogen-activated protein kinase binding;GO:0009931//calcium-dependent protein serine/threonine kinase activity;GO:0004672//protein kinase activity;GO:0005524//ATP binding;GO:0016301//kinase activity;GO:0000166//nucleotide binding;GO:0005516//calmodulin binding;GO:0016772//transferase activity, transferring phosphorus-containing groups;GO:0004871//sign…	GO:0006954//inflammatory response;GO:0035924//cellular response to vascular endothelial growth factor stimulus;GO:0034097//response to cytokine;GO:0048010//vascular endothelial growth factor receptor signaling pathway;GO:0002224//toll-like receptor signaling pathway;GO:0006468//protein phosphorylation;GO:0018105//peptidyl-serine phosphorylation;GO:0016310//phosphorylation;GO:0046777//protein auto…
ENSDARG00000018553	0.55	1.2	2.025	-	ko05164//Influenza A;ko05162//Measles;ko04622//RIG-I-like receptor signaling pathway	-	GO:0003674//molecular_function;GO:0043167//ion binding;GO:0003677//DNA binding;GO:0005524//ATP binding;GO:0016787//hydrolase activity;GO:0016817//hydrolase activity, acting on acid anhydrides	GO:0008150//biological_process
ENSDARG00000018611	1.075	0.4	0.165	ladybird homeobox 1b [Source:ZFIN;Acc:ZDB-GENE-050309-27]	-	GO:0005634//nucleus;GO:0005575//cellular_component;GO:0005622//intracellular;GO:0005623//cell;GO:0043226//organelle	GO:0003677//DNA binding;GO:0043565//sequence-specific DNA binding;GO:0003674//molecular_function	GO:0006355//regulation of transcription, DNA-templated;GO:0008150//biological_process
ENSDARG00000018616	0.97	0.825	0.135	-	-	-	-	-
ENSDARG00000018621	4.09	5.495	2.705	solute carrier family 6 (neutral amino acid transporter), member 19a [Source:ZFIN;Acc:ZDB-GENE-070620-2]	-	GO:0016020//membrane;GO:0005887//integral component of plasma membrane;GO:0016021//integral component of membrane;GO:0005575//cellular_component;GO:0005623//cell;GO:0005886//plasma membrane	GO:0005328//neurotransmitter:sodium symporter activity;GO:0015293//symporter activity;GO:0003674//molecular_function;GO:0022857//transmembrane transporter activity	GO:0006810//transport;GO:0006836//neurotransmitter transport;GO:0008150//biological_process
ENSDARG00000018623	4.31	5.605	1.395	RAD54-like (S. cerevisiae) [Source:ZFIN;Acc:ZDB-GENE-040426-968]	ko03440//Homologous recombination	-	GO:0016817//hydrolase activity, acting on acid anhydrides;GO:0046872//metal ion binding;GO:0003677//DNA binding;GO:0008094//DNA-dependent ATPase activity;GO:0005524//ATP binding;GO:0003674//molecular_function;GO:0043167//ion binding;GO:0016887//ATPase activity	-
ENSDARG00000018687	0.05	0.315	0.06	integrin, alpha 2b [Source:ZFIN;Acc:ZDB-GENE-051031-1]	ko05200//Pathways in cancer;ko04810//Regulation of actin cytoskeleton;ko04510//Focal adhesion;ko05414//Dilated cardiomyopathy;ko05410//Hypertrophic cardiomyopathy (HCM);ko05222//Small cell lung cancer;ko05412//Arrhythmogenic right ventricular cardiomyopathy (ARVC);ko04512//ECM-receptor interaction;ko04640//Hematopoietic cell lineage	GO:0008305//integrin complex;GO:0016020//membrane;GO:0016021//integral component of membrane;GO:0005575//cellular_component;GO:0005623//cell;GO:0005886//plasma membrane;GO:0043234//protein complex	GO:0005515//protein binding;GO:0003674//molecular_function	GO:0007596//blood coagulation;GO:0007229//integrin-mediated signaling pathway;GO:0001935//endothelial cell proliferation;GO:0007155//cell adhesion;GO:0001525//angiogenesis;GO:0008150//biological_process;GO:0048646//anatomical structure formation involved in morphogenesis;GO:0048856//anatomical structure development;GO:0008283//cell proliferation;GO:0007165//signal transduction;GO:0006950//respons…
ENSDARG00000018716	1.68	1.6	4.575	-	ko01100//Metabolic pathways;ko04070//Phosphatidylinositol signaling system;ko00564//Glycerophospholipid metabolism;ko00561//Glycerolipid metabolism	-	-	-
ENSDARG00000018773	0.555	0.9	1.275	-	-	-	-	-
ENSDARG00000018787	16.825	31.075	36.385	ephrin-A1b [Source:ZFIN;Acc:ZDB-GENE-041007-5]	-	GO:0016020//membrane;GO:0046658//anchored component of plasma membrane;GO:0005575//cellular_component;GO:0005623//cell;GO:0005886//plasma membrane	GO:0046875//ephrin receptor binding;GO:0003674//molecular_function	GO:0001525//angiogenesis;GO:0048013//ephrin receptor signaling pathway;GO:0007411//axon guidance;GO:0000902//cell morphogenesis;GO:0008150//biological_process;GO:0030154//cell differentiation;GO:0040011//locomotion;GO:0048856//anatomical structure development;GO:0007165//signal transduction;GO:0048646//anatomical structure formation involved in morphogenesis
ENSDARG00000018809	1.035	0.865	2.045	abhydrolase domain containing 3 [Source:ZFIN;Acc:ZDB-GENE-040912-90]	-	GO:0005575//cellular_component;GO:0005575//cellular_component	GO:0016787//hydrolase activity;GO:0003674//molecular_function	-
ENSDARG00000018881	21.42	14.165	6.625	apolipoprotein B mRNA editing enzyme, catalytic polypeptide-like 2a [Source:ZFIN;Acc:ZDB-GENE-050306-15]	-	GO:0005575//cellular_component;GO:0005575//cellular_component	GO:0016814//hydrolase activity, acting on carbon-nitrogen (but not peptide) bonds, in cyclic amidines;GO:0008270//zinc ion binding;GO:0005515//protein binding;GO:0003824//catalytic activity;GO:0003674//molecular_function;GO:0043167//ion binding;GO:0016810//hydrolase activity, acting on carbon-nitrogen (but not peptide) bonds	GO:0043697//cell dedifferentiation;GO:0070654//sensory epithelium regeneration;GO:0043388//positive regulation of DNA binding;GO:0031099//regeneration;GO:0060538//skeletal muscle organ development;GO:0001947//heart looping;GO:0008150//biological_process;GO:0009790//embryo development;GO:0048856//anatomical structure development;GO:0006950//response to stress;GO:0040007//growth
ENSDARG00000018902	24.43	11.95	24.145	pescadillo [Source:ZFIN;Acc:ZDB-GENE-990415-206]	-	GO:0005575//cellular_component;GO:0005622//intracellular;GO:0005623//cell;GO:0005634//nucleus;GO:0005654//nucleoplasm;GO:0043226//organelle;GO:0005730//nucleolus;GO:0043234//protein complex	GO:0003674//molecular_function;GO:0003723//RNA binding	GO:0008150//biological_process;GO:0048856//anatomical structure development;GO:0042254//ribosome biogenesis;GO:0034641//cellular nitrogen compound metabolic process;GO:0008283//cell proliferation;GO:0030154//cell differentiation
ENSDARG00000018913	0.495	0.945	1.165	-	-	-	-	-
ENSDARG00000018918	4.525	3.795	1.97	RAD17 homolog (S. pombe) [Source:ZFIN;Acc:ZDB-GENE-040718-409]	-	GO:0005634//nucleus;GO:0031389//Rad17 RFC-like complex;GO:0005575//cellular_component;GO:0005622//intracellular;GO:0005623//cell;GO:0005694//chromosome;GO:0043226//organelle;GO:0043234//protein complex	GO:0005524//ATP binding;GO:0003689//DNA clamp loader activity;GO:0000166//nucleotide binding;GO:0003674//molecular_function;GO:0003677//DNA binding;GO:0016887//ATPase activity;GO:0043167//ion binding	GO:0006281//DNA repair;GO:0000077//DNA damage checkpoint;GO:0007049//cell cycle;GO:0008150//biological_process;GO:0006950//response to stress;GO:0006259//DNA metabolic process;GO:0034641//cellular nitrogen compound metabolic process
ENSDARG00000018944	19.75	17.14	8.56	4-hydroxy-2-oxoglutarate aldolase 1 [Source:ZFIN;Acc:ZDB-GENE-040426-2242]	-	GO:0005575//cellular_component;GO:0005622//intracellular;GO:0005623//cell;GO:0005737//cytoplasm;GO:0005739//mitochondrion;GO:0043226//organelle	GO:0003674//molecular_function;GO:0016829//lyase activity	GO:0008150//biological_process
ENSDARG00000018961	113.48	210.11	300.12	GTP binding protein 4 [Source:ZFIN;Acc:ZDB-GENE-030131-5982]	ko03008//Ribosome biogenesis in eukaryotes	GO:0005730//nucleolus;GO:0005634//nucleus;GO:0005575//cellular_component;GO:0005622//intracellular;GO:0005623//cell;GO:0043226//organelle	GO:0005525//GTP binding;GO:0000166//nucleotide binding;GO:0003674//molecular_function;GO:0043167//ion binding	GO:0042254//ribosome biogenesis;GO:0008150//biological_process
ENSDARG00000018967	0.81	1.395	1.76	-	ko04080//Neuroactive ligand-receptor interaction	-	-	-
ENSDARG00000019098	35.425	33.705	13.91	CD82 molecule a [Source:ZFIN;Acc:ZDB-GENE-030131-2818]	ko04115//p53 signaling pathway	GO:0016021//integral component of membrane;GO:0016020//membrane;GO:0005575//cellular_component	GO:0003674//molecular_function;GO:0003674//molecular_function	GO:0008150//biological_process;GO:0008150//biological_process
ENSDARG00000019117	32.03	25.04	15.36	-	ko04510//Focal adhesion	GO:0030018//Z disc;GO:0005575//cellular_component;GO:0005622//intracellular;GO:0005623//cell;GO:0005737//cytoplasm;GO:0043226//organelle	GO:0003779//actin binding;GO:0003674//molecular_function;GO:0008092//cytoskeletal protein binding	GO:0007155//cell adhesion;GO:0031532//actin cytoskeleton reorganization;GO:0008016//regulation of heart contraction;GO:0007160//cell-matrix adhesion;GO:0008150//biological_process;GO:0007010//cytoskeleton organization
ENSDARG00000019122	1.36	0.175	0.001	-	-	-	GO:0004222//metalloendopeptidase activity;GO:0008237//metallopeptidase activity;GO:0016787//hydrolase activity;GO:0008233//peptidase activity;GO:0046872//metal ion binding;GO:0008270//zinc ion binding;GO:0003674//molecular_function;GO:0043167//ion binding	GO:0035188//hatching;GO:0006508//proteolysis;GO:0008150//biological_process
ENSDARG00000019137	21.775	18.73	41.585	translocation associated membrane protein 1 [Source:ZFIN;Acc:ZDB-GENE-021011-1]	ko04141//Protein processing in endoplasmic reticulum	GO:0016020//membrane;GO:0016021//integral component of membrane;GO:0005575//cellular_component	-	GO:0006810//transport;GO:0015031//protein transport;GO:0008150//biological_process
ENSDARG00000019156	4.43	4.76	2.1	HAUS augmin-like complex, subunit 5 [Source:ZFIN;Acc:ZDB-GENE-041114-150]	-	GO:0070652//HAUS complex;GO:0005575//cellular_component;GO:0005622//intracellular;GO:0005623//cell;GO:0005856//cytoskeleton;GO:0043226//organelle;GO:0043234//protein complex	GO:0003674//molecular_function;GO:0003674//molecular_function	GO:0051225//spindle assembly;GO:0051297//centrosome organization;GO:0007010//cytoskeleton organization;GO:0008150//biological_process;GO:0006461//protein complex assembly;GO:0007049//cell cycle;GO:0022607//cellular component assembly;GO:0065003
ENSDARG00000019179	2.93	3.385	6.88	-	-	GO:0016020//membrane;GO:0016021//integral component of membrane;GO:0005575//cellular_component	-	GO:0008150//biological_process;GO:0008150//biological_process
ENSDARG00000019205	6.34	9.545	15.525	-	-	-	-	-
ENSDARG00000019207	0.91	2.41	3.605	ABO blood group (transferase A, alpha 1-3-N-acetylgalactosaminyltransferase; transferase B, alpha 1-3-galactosyltransferase) [Source:ZFIN;Acc:ZDB-GENE-081104-23]	-	GO:0016020//membrane;GO:0005575//cellular_component	GO:0016758//transferase activity, transferring hexosyl groups;GO:0003674//molecular_function;GO:0016757//transferase activity, transferring glycosyl groups	GO:0005975//carbohydrate metabolic process;GO:0008150//biological_process
ENSDARG00000019222	74.925	38.925	36.37	mitochondrial ribosomal protein L24 [Source:ZFIN;Acc:ZDB-GENE-040718-98]	-	GO:0005575//cellular_component;GO:0005622//intracellular;GO:0005623//cell;GO:0005737//cytoplasm;GO:0005739//mitochondrion;GO:0043226//organelle;GO:0005840//ribosome	GO:0003674//molecular_function;GO:0003735//structural constituent of ribosome;GO:0005198//structural molecule activity	GO:0006412//translation;GO:0008150//biological_process;GO:0009058//biosynthetic process
ENSDARG00000019228	13.885	36.08	44.53	-	ko04975//Fat digestion and absorption	-	GO:0016740//transferase activity;GO:0016747//transferase activity, transferring acyl groups other than amino-acyl groups;GO:0016746//transferase activity, transferring acyl groups;GO:0003674//molecular_function	GO:0001878//response to yeast;GO:0008150//biological_process
ENSDARG00000019250	1.415	0.795	0.09	-	-	-	-	-
ENSDARG00000019260	15.03	49.265	44.315	dehydrogenase/reductase (SDR family) member 9 [Source:ZFIN;Acc:ZDB-GENE-030131-1249]	-	-	GO:0016491//oxidoreductase activity;GO:0004745//retinol dehydrogenase activity;GO:0003674//molecular_function	GO:0042572//retinol metabolic process;GO:0031017//exocrine pancreas development;GO:0060047//heart contraction;GO:0048703//embryonic viscerocranium morphogenesis;GO:0001947//heart looping;GO:0014032//neural crest cell development;GO:0008152//metabolic process;GO:0035138//pectoral fin morphogenesis;GO:0042574//retinal metabolic process;GO:0048546//digestive tract morphogenesis;GO:0008150//biologica…
ENSDARG00000019274	12.57	11.19	5.47	RAS, dexamethasone-induced 1 [Source:ZFIN;Acc:ZDB-GENE-040426-1473]	-	GO:0016020//membrane;GO:0005575//cellular_component	GO:0005525//GTP binding;GO:0000166//nucleotide binding;GO:0003674//molecular_function;GO:0043167//ion binding	GO:0007165//signal transduction;GO:0007264//small GTPase mediated signal transduction;GO:0008150//biological_process
ENSDARG00000019280	17.305	10.2	21.685	-	ko00970//Aminoacyl-tRNA biosynthesis	-	-	-
ENSDARG00000019294	0.22	1.21	2.515	cerebellin 8 [Source:ZFIN;Acc:ZDB-GENE-080204-13]	-	GO:0005575//cellular_component;GO:0005575//cellular_component	GO:0003674//molecular_function;GO:0003674//molecular_function	GO:0008150//biological_process;GO:0008150//biological_process
ENSDARG00000019335	22.39	15.435	10.26	hes family bHLH transcription factor 6 [Source:ZFIN;Acc:ZDB-GENE-030828-5]	-	GO:0017053//transcriptional repressor complex;GO:0005634//nucleus;GO:0005575//cellular_component;GO:0005622//intracellular;GO:0005623//cell;GO:0043226//organelle;GO:0043234//protein complex	GO:0046982//protein heterodimerization activity;GO:0046983//protein dimerization activity;GO:0003677//DNA binding;GO:0003674//molecular_function	GO:0001756//somitogenesis;GO:0006351//transcription, DNA-templated;GO:0006355//regulation of transcription, DNA-templated;GO:0045892//negative regulation of transcription, DNA-templated;GO:0008150//biological_process;GO:0009058//biosynthetic process;GO:0034641//cellular nitrogen compound metabolic process;GO:0009790//embryo development;GO:0048646//anatomical structure formation involved in morpho…
ENSDARG00000019338	17.115	10.62	8.475	ADP-ribosylhydrolase like 2 [Source:ZFIN;Acc:ZDB-GENE-040912-85]	-	GO:0005575//cellular_component;GO:0005622//intracellular;GO:0005623//cell;GO:0005634//nucleus;GO:0043226//organelle	GO:0003674//molecular_function;GO:0016798//hydrolase activity, acting on glycosyl bonds;GO:0043167//ion binding	-
ENSDARG00000019353	1894.86	1556.16	703.275	secreted protein, acidic, cysteine-rich (osteonectin) [Source:ZFIN;Acc:ZDB-GENE-030131-9]	-	GO:0005578//proteinaceous extracellular matrix;GO:0005615//extracellular space;GO:0005575//cellular_component;GO:0005576//extracellular region	GO:0005509//calcium ion binding;GO:0003674//molecular_function;GO:0043167//ion binding	GO:0048752//semicircular canal morphogenesis;GO:0030916//otic vesicle formation;GO:0051216//cartilage development;GO:0032474//otolith morphogenesis;GO:0007165//signal transduction;GO:0060037//pharyngeal system development;GO:0008150//biological_process;GO:0009790//embryo development;GO:0048856//anatomical structure development;GO:0048646//anatomical structure formation involved in morphogenesis
ENSDARG00000019364	13.905	8.495	5.41	-	-	-	-	-
ENSDARG00000019396	2.055	4.35	3.565	-	-	-	-	-
ENSDARG00000019398	93.58	55.07	40.43	-	ko03050//Proteasome	-	-	-
ENSDARG00000019406	13.455	11.98	5.885	-	-	-	-	-
ENSDARG00000019417	22.38	12.865	9.98	growth arrest and DNA-damage-inducible, gamma a [Source:ZFIN;Acc:ZDB-GENE-040426-1882]	ko04010//MAPK signaling pathway;ko04110//Cell cycle;ko04115//p53 signaling pathway	GO:0005634//nucleus;GO:0005575//cellular_component;GO:0005622//intracellular;GO:0005623//cell;GO:0043226//organelle	GO:0003674//molecular_function;GO:0003674//molecular_function	GO:0006950//response to stress;GO:0051726//regulation of cell cycle;GO:0008150//biological_process
ENSDARG00000019420	9.16	11.87	24.605	-	-	-	-	-
ENSDARG00000019457	2.83	3.815	7.125	-	-	-	GO:0046983//protein dimerization activity;GO:0003674//molecular_function	GO:0045893//positive regulation of transcription, DNA-templated;GO:0006355//regulation of transcription, DNA-templated;GO:0006959//humoral immune response;GO:0045670//regulation of osteoclast differentiation;GO:0008150//biological_process;GO:0002376//immune system process
ENSDARG00000019492	9.8	23.13	20.64	sex hormone-binding globulin [Source:ZFIN;Acc:ZDB-GENE-030131-1324]	-	-	GO:0005496//steroid binding;GO:0005497//androgen binding;GO:0003674//molecular_function;GO:0008289//lipid binding	-
ENSDARG00000019498	1.71	0.49	4.3	cryptochrome 5 [Source:ZFIN;Acc:ZDB-GENE-010426-8]	-	-	GO:0003913//DNA photolyase activity;GO:0003914//DNA (6-4) photolyase activity;GO:0016829//lyase activity;GO:0003674//molecular_function	GO:0006281//DNA repair;GO:0009416//response to light stimulus;GO:0008150//biological_process;GO:0006259//DNA metabolic process;GO:0006950//response to stress;GO:0034641//cellular nitrogen compound metabolic process
ENSDARG00000019507	30.065	14.95	25.31	minichromosome maintenance complex component 5 [Source:ZFIN;Acc:ZDB-GENE-021209-1]	ko04110//Cell cycle;ko03030//DNA replication	GO:0042555//MCM complex;GO:0005634//nucleus;GO:0005575//cellular_component;GO:0005622//intracellular;GO:0005623//cell;GO:0043226//organelle;GO:0043234//protein complex	GO:0000166//nucleotide binding;GO:0005524//ATP binding;GO:0003678//DNA helicase activity;GO:0003677//DNA binding;GO:0003682//chromatin binding;GO:0016787//hydrolase activity;GO:0004386//helicase activity;GO:0003688//DNA replication origin binding;GO:0003674//molecular_function;GO:0043167//ion binding	GO:0006270//DNA replication initiation;GO:0043066//negative regulation of apoptotic process;GO:0043009//chordate embryonic development;GO:0006260//DNA replication;GO:0000278//mitotic cell cycle;GO:0007049//cell cycle;GO:0008150//biological_process;GO:0006259//DNA metabolic process;GO:0009058//biosynthetic process;GO:0034641//cellular nitrogen compound metabolic process;GO:0009790//embryo developm…
ENSDARG00000019516	1.215	1.05	0.585	-	-	-	-	-
ENSDARG00000019525	6.74	12.615	6.225	-	-	-	-	-
ENSDARG00000019532	14.27	63.335	395.135	-	ko03320//PPAR signaling pathway;ko01040//Biosynthesis of unsaturated fatty acids;ko00592//alpha-Linolenic acid metabolism	-	-	-
ENSDARG00000019566	50.195	58.655	17.415	-	-	GO:0005575//cellular_component;GO:0005622//intracellular;GO:0005623//cell;GO:0005737//cytoplasm;GO:0005634//nucleus;GO:0043226//organelle	GO:0003674//molecular_function;GO:0003677//DNA binding	GO:0008150//biological_process;GO:0009058//biosynthetic process;GO:0034641//cellular nitrogen compound metabolic process;GO:0030154//cell differentiation;GO:0048856//anatomical structure development
ENSDARG00000019660	0.05	0.535	0.34	relaxin/insulin-like family peptide receptor 2a [Source:ZFIN;Acc:ZDB-GENE-110408-27]	ko04080//Neuroactive ligand-receptor interaction	GO:0016020//membrane;GO:0016021//integral component of membrane;GO:0005575//cellular_component	GO:0004930//G-protein coupled receptor activity;GO:0003674//molecular_function;GO:0004871//signal transducer activity	GO:0007165//signal transduction;GO:0007186//G-protein coupled receptor signaling pathway;GO:0008150//biological_process
ENSDARG00000019686	0.81	1.58	2.45	-	-	-	-	-
ENSDARG00000019713	6.765	2.99	1.78	-	-	-	-	-
ENSDARG00000019715	9.44	14.57	5.8	-	-	-	-	-
ENSDARG00000019763	15.765	2.955	1.445	-	ko04142//Lysosome;ko04380//Osteoclast differentiation;ko05323//Rheumatoid arthritis;ko00740//Riboflavin metabolism	GO:0005575//cellular_component;GO:0005575//cellular_component	GO:0016787//hydrolase activity;GO:0003993//acid phosphatase activity;GO:0003674//molecular_function;GO:0016791//phosphatase activity	-
ENSDARG00000019772	2.405	4.065	7.835	-	-	GO:0005575//cellular_component;GO:0005576//extracellular region	GO:0003674//molecular_function;GO:0008233//peptidase activity	GO:0008150//biological_process
ENSDARG00000019791	16.54	7.585	21.49	-	-	GO:0005829//cytosol;GO:0005575//cellular_component;GO:0005622//intracellular;GO:0005623//cell;GO:0005737//cytoplasm;GO:0005829//cytosol	GO:0035242//protein-arginine omega-N asymmetric methyltransferase activity;GO:0008168//methyltransferase activity;GO:0016740//transferase activity;GO:0008757//S-adenosylmethionine-dependent methyltransferase activity;GO:0008469//histone-arginine N-methyltransferase activity;GO:0003674//molecular_function	GO:0032259//methylation;GO:0006479//protein methylation;GO:0006355//regulation of transcription, DNA-templated;GO:0034969//histone arginine methylation;GO:0006464//cellular protein modification process;GO:0008150//biological_process;GO:0051276//chromosome organization
ENSDARG00000019810	9.155	8.045	4.205	nuclear factor, erythroid 2-like 3 [Source:ZFIN;Acc:ZDB-GENE-040426-2334]	-	GO:0005634//nucleus;GO:0005575//cellular_component;GO:0005622//intracellular;GO:0005623//cell;GO:0043226//organelle	GO:0003677//DNA binding;GO:0043565//sequence-specific DNA binding;GO:0003700//sequence-specific DNA binding transcription factor activity;GO:0001071//nucleic acid binding transcription factor activity;GO:0003674//molecular_function	GO:0006351//transcription, DNA-templated;GO:0006355//regulation of transcription, DNA-templated;GO:0008150//biological_process;GO:0009058//biosynthetic process;GO:0034641//cellular nitrogen compound metabolic process
ENSDARG00000019835	3.645	3.32	1.64	NK2 homeobox 1 [Source:ZFIN;Acc:ZDB-GENE-010404-1]	-	GO:0005634//nucleus;GO:0005575//cellular_component;GO:0005622//intracellular;GO:0005623//cell;GO:0043226//organelle	GO:0003677//DNA binding;GO:0043565//sequence-specific DNA binding;GO:0003674//molecular_function	GO:0006355//regulation of transcription, DNA-templated;GO:0008150//biological_process
ENSDARG00000019861	1.635	1.27	2.58	-	-	-	-	-
ENSDARG00000019874	0.97	1.295	2.155	heat shock 105/110 protein 1 [Source:ZFIN;Acc:ZDB-GENE-120410-4]	-	-	GO:0003674//molecular_function	-
ENSDARG00000019877	6.515	10.91	5.235	ribokinase [Source:ZFIN;Acc:ZDB-GENE-040625-112]	ko00030//Pentose phosphate pathway	GO:0005575//cellular_component;GO:0005575//cellular_component	GO:0016740//transferase activity;GO:0004747//ribokinase activity;GO:0016301//kinase activity;GO:0016773//phosphotransferase activity, alcohol group as acceptor;GO:0003674//molecular_function	GO:0006014//D-ribose metabolic process;GO:0016310//phosphorylation;GO:0008150//biological_process;GO:0005975//carbohydrate metabolic process
ENSDARG00000019920	0.055	0.49	0.001	lefty1 [Source:ZFIN;Acc:ZDB-GENE-990630-10]	ko04350//TGF-beta signaling pathway	GO:0005615//extracellular space;GO:0005576//extracellular region;GO:0005575//cellular_component;GO:0005615//extracellular space	GO:0008083//growth factor activity;GO:0005160//transforming growth factor beta receptor binding;GO:0005125//cytokine activity;GO:0003674//molecular_function	GO:0035050//embryonic heart tube development;GO:0003140//determination of left/right asymmetry in lateral mesoderm;GO:0061371//determination of heart left/right asymmetry;GO:0042981//regulation of apoptotic process;GO:0016049//cell growth;GO:0007368//determination of left/right symmetry;GO:0009953//dorsal/ventral pattern formation;GO:0035462//determination of left/right asymmetry in diencephalon;…
ENSDARG00000019932	2.88	7.995	10.51	solute carrier family 5 (sodium/inositol cotransporter), member 11 [Source:ZFIN;Acc:ZDB-GENE-041114-9]	-	GO:0016020//membrane;GO:0016021//integral component of membrane;GO:0005575//cellular_component	GO:0005215//transporter activity;GO:0003674//molecular_function	GO:0055085//transmembrane transport;GO:0006810//transport;GO:0008150//biological_process
ENSDARG00000019945	3.405	3.625	7.09	-	-	GO:0005575//cellular_component;GO:0005575//cellular_component	GO:0004725//protein tyrosine phosphatase activity;GO:0016787//hydrolase activity;GO:0016791//phosphatase activity;GO:0004721//phosphoprotein phosphatase activity;GO:0003674//molecular_function	GO:0016311//dephosphorylation;GO:0006470//protein dephosphorylation;GO:0006464//cellular protein modification process;GO:0008150//biological_process
ENSDARG00000019949	99.42	27.31	26.06	-	-	-	-	-
ENSDARG00000020007	333.71	291.02	146.15	-	ko04510//Focal adhesion;ko05146//Amoebiasis;ko04512//ECM-receptor interaction;ko04974//Protein digestion and absorption	GO:0005581//collagen trimer;GO:0005575//cellular_component;GO:0043234//protein complex	GO:0005201//extracellular matrix structural constituent;GO:0003674//molecular_function;GO:0005198//structural molecule activity	GO:0009612//response to mechanical stimulus;GO:0008150//biological_process
ENSDARG00000020015	16.64	7.41	14.86	-	-	GO:0030529//ribonucleoprotein complex;GO:0005840//ribosome;GO:0005575//cellular_component;GO:0005622//intracellular;GO:0005623//cell;GO:0005737//cytoplasm;GO:0043226//organelle	-	-
ENSDARG00000020024	6.585	3.375	3.195	-	-	-	-	-
ENSDARG00000020028	1.99	1.23	0.67	carbamoyl-phosphate synthase 1, mitochondrial [Source:ZFIN;Acc:ZDB-GENE-081105-17]	ko01100//Metabolic pathways;ko00330//Arginine and proline metabolism;ko00250//Alanine, aspartate and glutamate metabolism	GO:0005575//cellular_component;GO:0005622//intracellular;GO:0005623//cell;GO:0005737//cytoplasm	GO:0003674//molecular_function;GO:0016874//ligase activity;GO:0043167//ion binding	GO:0008150//biological_process;GO:0009058//biosynthetic process;GO:0034641//cellular nitrogen compound metabolic process;GO:0044281//small molecule metabolic process;GO:0071941;GO:0006520//cellular amino acid metabolic process;GO:0042592//homeostatic process
ENSDARG00000020046	0.45	0.28	0.935	aryl hydrocarbon receptor 1a [Source:ZFIN;Acc:ZDB-GENE-020531-2]	-	GO:0005667//transcription factor complex;GO:0005634//nucleus;GO:0005737//cytoplasm;GO:0034753//nuclear aryl hydrocarbon receptor complex;GO:0005575//cellular_component;GO:0005622//intracellular;GO:0005623//cell;GO:0043226//organelle;GO:0043234//protein complex	GO:0003677//DNA binding;GO:0003700//sequence-specific DNA binding transcription factor activity;GO:0004871//signal transducer activity;GO:0046983//protein dimerization activity;GO:0003674//molecular_function;GO:0001071//nucleic acid binding transcription factor activity	GO:0006355//regulation of transcription, DNA-templated;GO:0045944//positive regulation of transcription from RNA polymerase II promoter;GO:0009410//response to xenobiotic stimulus;GO:0007165//signal transduction;GO:0071407//cellular response to organic cyclic compound;GO:0006351//transcription, DNA-templated;GO:0008150//biological_process;GO:0009058//biosynthetic process;GO:0034641//cellular nitr…
ENSDARG00000020054	2.985	6.5	5.285	-	ko01100//Metabolic pathways;ko00280//Valine, leucine and isoleucine degradation;ko00380//Tryptophan metabolism;ko00982//Drug metabolism - cytochrome P450;ko00350//Tyrosine metabolism;ko00760//Nicotinate and nicotinamide metabolism;ko00750//Vitamin B6 metabolism	-	GO:0046872//metal ion binding;GO:0016491//oxidoreductase activity;GO:0016614//oxidoreductase activity, acting on CH-OH group of donors;GO:0050660//flavin adenine dinucleotide binding;GO:0003824//catalytic activity;GO:0005506//iron ion binding;GO:0051536//iron-sulfur cluster binding;GO:0008762//UDP-N-acetylmuramate dehydrogenase activity;GO:0051537//2 iron, 2 sulfur cluster binding;GO:0009055//ele…	GO:0055114//oxidation-reduction process;GO:0008150//biological_process
ENSDARG00000020079	3.84	3.7	0.99	-	ko03410//Base excision repair	-	GO:0004519//endonuclease activity;GO:0016799//hydrolase activity, hydrolyzing N-glycosyl compounds;GO:0003684//damaged DNA binding;GO:0003906//DNA-(apurinic or apyrimidinic site) lyase activity;GO:0008270//zinc ion binding;GO:0016787//hydrolase activity;GO:0003676//nucleic acid binding;GO:0004518//nuclease activity;GO:0003677//DNA binding;GO:0003674//molecular_function;GO:0043167//ion binding;GO:…	GO:0006281//DNA repair;GO:0006289//nucleotide-excision repair;GO:0006284//base-excision repair;GO:0006259//DNA metabolic process;GO:0006950//response to stress;GO:0008150//biological_process;GO:0034641//cellular nitrogen compound metabolic process
ENSDARG00000020084	0.705	1.105	1.635	thyroglobulin [Source:ZFIN;Acc:ZDB-GENE-030519-1]	-	-	GO:0003674//molecular_function	-
ENSDARG00000020114	10.905	8.3	4.58	-	-	-	-	-
ENSDARG00000020122	31.805	21.745	12.655	-	-	-	-	-
ENSDARG00000020149	3.055	4.225	6.64	-	-	-	-	-
ENSDARG00000020158	2.025	1.48	0.855	-	-	-	-	-
ENSDARG00000020191	0.295	0.385	0.88	-	-	GO:0005575//cellular_component;GO:0005575//cellular_component	GO:0030145//manganese ion binding;GO:0005506//iron ion binding;GO:0004721//phosphoprotein phosphatase activity;GO:0016787//hydrolase activity;GO:0005509//calcium ion binding;GO:0003674//molecular_function;GO:0043167//ion binding;GO:0016791//phosphatase activity	GO:0050906//detection of stimulus involved in sensory perception;GO:0008150//biological_process;GO:0050877//neurological system process
ENSDARG00000020212	11.785	28.635	16.505	-	-	-	-	-
ENSDARG00000020239	9.285	16.92	28.445	lipin 1 [Source:ZFIN;Acc:ZDB-GENE-080722-2]	ko01100//Metabolic pathways;ko00564//Glycerophospholipid metabolism;ko00561//Glycerolipid metabolism	GO:0005634//nucleus;GO:0005741//mitochondrial outer membrane;GO:0005575//cellular_component;GO:0005622//intracellular;GO:0005623//cell;GO:0005737//cytoplasm;GO:0005739//mitochondrion;GO:0043226//organelle;GO:0005634//nucleus;GO:0005634//nucleus;GO:0005741//mitochondrial outer membrane;GO:0005575//cellular_component;GO:0005622//intracellular;GO:0005623//cell;GO:0005737//cytoplasm;GO:0005739//mitoc…	GO:0003713//transcription coactivator activity;GO:0008195//phosphatidate phosphatase activity;GO:0003674//molecular_function;GO:0016791//phosphatase activity;GO:0000988//protein binding transcription factor activity;GO:0003713//transcription coactivator activity;GO:0008195//phosphatidate phosphatase activity;GO:0003674//molecular_function;GO:0016791//phosphatase activity;GO:0000988//protein bindi…	GO:0009062//fatty acid catabolic process;GO:0045944//positive regulation of transcription from RNA polymerase II promoter;GO:0019432//triglyceride biosynthetic process;GO:0006357//regulation of transcription from RNA polymerase II promoter;GO:0008150//biological_process;GO:0006629//lipid metabolic process;GO:0009058//biosynthetic process;GO:0009056//catabolic process;GO:0044281//small molecule me…
ENSDARG00000020265	2.68	1.885	0.465	-	-	-	-	-
ENSDARG00000020289	3	1.735	0.225	-	-	-	-	-
ENSDARG00000020326	0.795	1.39	2.385	tyrosine kinase 2 [Source:ZFIN;Acc:ZDB-GENE-071116-4]	ko05164//Influenza A;ko05160//Hepatitis C;ko05145//Toxoplasmosis;ko04630//Jak-STAT signaling pathway;ko04380//Osteoclast differentiation;ko05162//Measles	GO:0005575//cellular_component;GO:0005622//intracellular;GO:0005623//cell;GO:0005856//cytoskeleton;GO:0043226//organelle;GO:0005886//plasma membrane	GO:0003674//molecular_function;GO:0016301//kinase activity;GO:0043167//ion binding	GO:0002376//immune system process;GO:0006950//response to stress;GO:0008150//biological_process;GO:0007165//signal transduction;GO:0006464//cellular protein modification process;GO:0030154//cell differentiation
ENSDARG00000020364	159.065	305.36	328.65	fructose-1,6-bisphosphatase 1b [Source:ZFIN;Acc:ZDB-GENE-021206-11]	ko01100//Metabolic pathways;ko04910//Insulin signaling pathway;ko00010//Glycolysis / Gluconeogenesis;ko00030//Pentose phosphate pathway;ko00051//Fructose and mannose metabolism	-	GO:0042578//phosphoric ester hydrolase activity;GO:0016787//hydrolase activity;GO:0042132//fructose 1,6-bisphosphate 1-phosphatase activity;GO:0003674//molecular_function;GO:0016791//phosphatase activity	GO:0071391//cellular response to estrogen stimulus;GO:0005975//carbohydrate metabolic process;GO:0008150//biological_process
ENSDARG00000020377	34.62	22.485	13.415	eukaryotic translation initiation factor 4, gamma 2a [Source:ZFIN;Acc:ZDB-GENE-030131-2173]	-	GO:0005575//cellular_component;GO:0005575//cellular_component	GO:0003723//RNA binding;GO:0003674//molecular_function	GO:0007498//mesoderm development;GO:0008150//biological_process;GO:0048856//anatomical structure development
ENSDARG00000020417	3.685	2.305	1.78	empty spiracles homeobox 3 [Source:ZFIN;Acc:ZDB-GENE-990415-53]	-	GO:0005634//nucleus;GO:0005575//cellular_component;GO:0005622//intracellular;GO:0005623//cell;GO:0043226//organelle	GO:0003677//DNA binding;GO:0043565//sequence-specific DNA binding;GO:0003674//molecular_function	GO:0007420//brain development;GO:0021537//telencephalon development;GO:0021862//early neuron differentiation in forebrain;GO:0021952//central nervous system projection neuron axonogenesis;GO:0006355//regulation of transcription, DNA-templated;GO:0008150//biological_process;GO:0000902//cell morphogenesis;GO:0030154//cell differentiation;GO:0048856//anatomical structure development
ENSDARG00000020454	98.385	57.685	45.45	-	ko03050//Proteasome	GO:0005838//proteasome regulatory particle;GO:0005575//cellular_component;GO:0005622//intracellular;GO:0005623//cell;GO:0043234//protein complex	GO:0003674//molecular_function;GO:0003674//molecular_function	GO:0006508//proteolysis;GO:0008150//biological_process
ENSDARG00000020465	103.19	66.8	46.385	EWS RNA-binding protein 1b [Source:ZFIN;Acc:ZDB-GENE-030131-1600]	-	-	GO:0008270//zinc ion binding;GO:0000166//nucleotide binding;GO:0003676//nucleic acid binding;GO:0003674//molecular_function;GO:0043167//ion binding;GO:0003676//nucleic acid binding;GO:0003674//molecular_function;GO:0008270//zinc ion binding;GO:0043167//ion binding	GO:0021954//central nervous system neuron development;GO:0007067//mitosis;GO:0007049//cell cycle;GO:0007067//mitosis;GO:0008150//biological_process;GO:0030154//cell differentiation;GO:0048856//anatomical structure development
ENSDARG00000020473	15.005	8.505	6.17	-	-	-	-	-
ENSDARG00000020504	842.95	542.465	256.51	H3 histone, family 3A [Source:ZFIN;Acc:ZDB-GENE-040426-1928]	-	GO:0000786//nucleosome;GO:0005575//cellular_component;GO:0005622//intracellular;GO:0005623//cell;GO:0005694//chromosome;GO:0043226//organelle;GO:0043234//protein complex	-	-
ENSDARG00000020509	0.54	0.28	1.565	-	ko00140//Steroid hormone biosynthesis	GO:0016021//integral component of membrane;GO:0016020//membrane;GO:0005737//cytoplasm;GO:0005575//cellular_component;GO:0005622//intracellular;GO:0005623//cell	GO:0003865//3-oxo-5-alpha-steroid 4-dehydrogenase activity;GO:0016627//oxidoreductase activity, acting on the CH-CH group of donors;GO:0003674//molecular_function;GO:0016491//oxidoreductase activity	GO:0006629//lipid metabolic process;GO:0055114//oxidation-reduction process;GO:0008202//steroid metabolic process;GO:0008150//biological_process
ENSDARG00000020548	0.001	0.09	0.795	-	-	-	-	-
ENSDARG00000020581	6.845	8.665	3.825	-	-	-	-	-
ENSDARG00000020594	5.37	9.375	18.905	-	-	-	-	-
ENSDARG00000020602	38.92	8.43	27.965	G protein-coupled receptor kinase 7a [Source:ZFIN;Acc:ZDB-GENE-050824-1]	ko04144//Endocytosis;ko04062//Chemokine signaling pathway;ko04744//Phototransduction	GO:0005575//cellular_component	GO:0003674//molecular_function;GO:0016301//kinase activity;GO:0004871//signal transducer activity;GO:0043167//ion binding	GO:0008150//biological_process;GO:0050877//neurological system process;GO:0006464//cellular protein modification process;GO:0007165//signal transduction
ENSDARG00000020606	1.23	2.535	1.255	-	-	-	-	-
ENSDARG00000020693	35.48	65.98	73.28	-	ko04115//p53 signaling pathway	GO:0005634//nucleus;GO:0005575//cellular_component;GO:0005622//intracellular;GO:0005623//cell;GO:0043226//organelle	GO:0003674//molecular_function;GO:0003674//molecular_function	GO:0007368//determination of left/right symmetry;GO:0008150//biological_process
ENSDARG00000020702	2.64	1.77	0.74	outer dense fiber of sperm tails 2b [Source:ZFIN;Acc:ZDB-GENE-041008-119]	-	GO:0005575//cellular_component;GO:0005575//cellular_component	GO:0003674//molecular_function;GO:0003674//molecular_function	GO:0008150//biological_process;GO:0008150//biological_process
ENSDARG00000020711	56.775	62.8	17.71	-	ko01100//Metabolic pathways;ko00230//Purine metabolism;ko00240//Pyrimidine metabolism;ko04115//p53 signaling pathway;ko00480//Glutathione metabolism	GO:0005575//cellular_component;GO:0005622//intracellular;GO:0005623//cell;GO:0005737//cytoplasm;GO:0005575//cellular_component;GO:0005622//intracellular;GO:0005623//cell;GO:0005737//cytoplasm	GO:0003674//molecular_function;GO:0016491//oxidoreductase activity;GO:0043167//ion binding;GO:0003674//molecular_function;GO:0016491//oxidoreductase activity;GO:0043167//ion binding	GO:0008150//biological_process;GO:0006259//DNA metabolic process;GO:0009058//biosynthetic process;GO:0034641//cellular nitrogen compound metabolic process;GO:0008150//biological_process;GO:0006259//DNA metabolic process;GO:0009058//biosynthetic process;GO:0034641//cellular nitrogen compound metabolic process
ENSDARG00000020738	0.18	0.32	2.145	-	-	-	-	-
ENSDARG00000020749	0.375	0.32	0.03	caprin family member 2 [Source:ZFIN;Acc:ZDB-GENE-040812-2]	-	GO:0005575//cellular_component;GO:0005622//intracellular;GO:0005623//cell;GO:0005737//cytoplasm	GO:0003674//molecular_function;GO:0003723//RNA binding	GO:0008150//biological_process;GO:0030154//cell differentiation;GO:0048856//anatomical structure development
ENSDARG00000020761	15.255	24.455	30.65	-	-	GO:0005575//cellular_component;GO:0005575//cellular_component	GO:0003674//molecular_function;GO:0003674//molecular_function	GO:0008150//biological_process;GO:0008150//biological_process
ENSDARG00000020794	29.02	15.8	9.86	-	-	GO:0005575//cellular_component;GO:0005622//intracellular;GO:0005623//cell;GO:0005634//nucleus;GO:0043226//organelle	GO:0003674//molecular_function;GO:0003677//DNA binding	GO:0008150//biological_process;GO:0048856//anatomical structure development;GO:0009058//biosynthetic process;GO:0034641//cellular nitrogen compound metabolic process;GO:0030154//cell differentiation
ENSDARG00000020811	5.03	5.555	2.365	-	-	-	GO:0005509//calcium ion binding;GO:0003674//molecular_function;GO:0043167//ion binding;GO:0005509//calcium ion binding;GO:0003674//molecular_function;GO:0043167//ion binding	-
ENSDARG00000020814	16.135	6.485	8.81	Fas apoptotic inhibitory molecule b [Source:ZFIN;Acc:ZDB-GENE-040718-91]	-	GO:0005575//cellular_component;GO:0005575//cellular_component	GO:0003674//molecular_function;GO:0003674//molecular_function	GO:0043066//negative regulation of apoptotic process;GO:0008150//biological_process
ENSDARG00000020866	430.29	1217.31	2281.2	apolipoprotein A-IV b, tandem duplicate 2 [Source:ZFIN;Acc:ZDB-GENE-030131-3143]	-	GO:0042627//chylomicron;GO:0005576//extracellular region;GO:0034364//high-density lipoprotein particle;GO:0072562//blood microparticle;GO:0005575//cellular_component;GO:0005615//extracellular space	GO:0017127//cholesterol transporter activity;GO:0031210//phosphatidylcholine binding;GO:0008289//lipid binding;GO:0060228//phosphatidylcholine-sterol O-acyltransferase activator activity;GO:0015485//cholesterol binding;GO:0003674//molecular_function;GO:0030234//enzyme regulator activity;GO:0043167//ion binding	GO:0034372//very-low-density lipoprotein particle remodeling;GO:0010898//positive regulation of triglyceride catabolic process;GO:0042632//cholesterol homeostasis;GO:0043691//reverse cholesterol transport;GO:0045723//positive regulation of fatty acid biosynthetic process;GO:0046470//phosphatidylcholine metabolic process;GO:0030300//regulation of intestinal cholesterol absorption;GO:0010873//posit…
ENSDARG00000020876	9.765	21.535	21.595	-	-	-	-	-
ENSDARG00000020887	13.645	11.505	4.265	-	-	GO:0005575//cellular_component;GO:0005575//cellular_component	GO:0046872//metal ion binding;GO:0003674//molecular_function;GO:0043167//ion binding	GO:0030001//metal ion transport;GO:0006810//transport;GO:0008150//biological_process
ENSDARG00000020944	25.02	28.935	51.025	ezrin a [Source:ZFIN;Acc:ZDB-GENE-050522-18]	-	GO:0019898//extrinsic component of membrane;GO:0005737//cytoplasm;GO:0005856//cytoskeleton;GO:0005575//cellular_component;GO:0005622//intracellular;GO:0005623//cell;GO:0043226//organelle;GO:0019898//extrinsic component of membrane;GO:0005737//cytoplasm;GO:0005856//cytoskeleton;GO:0005575//cellular_component;GO:0005622//intracellular;GO:0005623//cell;GO:0043226//organelle	GO:0003779//actin binding;GO:0008092//cytoskeletal protein binding;GO:0003674//molecular_function;GO:0003779//actin binding;GO:0008092//cytoskeletal protein binding;GO:0003674//molecular_function	-
ENSDARG00000020952	7.685	20.17	40.305	-	-	-	-	-
ENSDARG00000020979	3.39	2.345	1.33	-	-	-	-	-
ENSDARG00000020981	3.72	2.155	1.34	solute carrier family 35 (UDP-N-acetylglucosamine (UDP-GlcNAc) transporter), member A3b [Source:ZFIN;Acc:ZDB-GENE-050417-460]	-	GO:0016020//membrane;GO:0016021//integral component of membrane;GO:0000139//Golgi membrane;GO:0005575//cellular_component;GO:0005622//intracellular;GO:0005623//cell;GO:0005737//cytoplasm;GO:0005794//Golgi apparatus;GO:0043226//organelle	GO:0005351//sugar:proton symporter activity;GO:0005338//nucleotide-sugar transmembrane transporter activity;GO:0003674//molecular_function;GO:0022857//transmembrane transporter activity	GO:0006810//transport;GO:0008643//carbohydrate transport;GO:0015780//nucleotide-sugar transport;GO:0008150//biological_process
ENSDARG00000020994	4.56	25.035	43.36	-	-	-	-	-
ENSDARG00000021004	17.41	7.995	7.475	-	-	-	-	-
ENSDARG00000021032	5.18	2.86	2.24	forkhead box D3 [Source:ZFIN;Acc:ZDB-GENE-980526-143]	-	GO:0005634//nucleus;GO:0005575//cellular_component;GO:0005622//intracellular;GO:0005623//cell;GO:0005634//nucleus;GO:0043226//organelle	GO:0043565//sequence-specific DNA binding;GO:0003677//DNA binding;GO:0003700//sequence-specific DNA binding transcription factor activity;GO:0000981//sequence-specific DNA binding RNA polymerase II transcription factor activity;GO:0001071//nucleic acid binding transcription factor activity;GO:0003674//molecular_function	GO:0050931//pigment cell differentiation;GO:0048937//lateral line nerve glial cell development;GO:0050935//iridophore differentiation;GO:0051216//cartilage development;GO:0007422//peripheral nervous system development;GO:0030318//melanocyte differentiation;GO:0006366//transcription from RNA polymerase II promoter;GO:0045892//negative regulation of transcription, DNA-templated;GO:0014032//neural c…
ENSDARG00000021059	88.74	229.13	255.8	aminolevulinate, delta-, synthase 1 [Source:ZFIN;Acc:ZDB-GENE-001229-2]	ko01100//Metabolic pathways;ko00260//Glycine, serine and threonine metabolism;ko00860//Porphyrin and chlorophyll metabolism	GO:0005759//mitochondrial matrix;GO:0005739//mitochondrion;GO:0005575//cellular_component;GO:0005622//intracellular;GO:0005623//cell;GO:0005737//cytoplasm;GO:0043226//organelle	GO:0030170//pyridoxal phosphate binding;GO:0003824//catalytic activity;GO:0003870//5-aminolevulinate synthase activity;GO:0016740//transferase activity;GO:0016746//transferase activity, transferring acyl groups;GO:0003674//molecular_function;GO:0043167//ion binding	GO:0006782//protoporphyrinogen IX biosynthetic process;GO:0008152//metabolic process;GO:0006783//heme biosynthetic process;GO:0009058//biosynthetic process;GO:0033014//tetrapyrrole biosynthetic process;GO:0006778//porphyrin-containing compound metabolic process;GO:0008150//biological_process;GO:0051186//cofactor metabolic process;GO:0034641//cellular nitrogen compound metabolic process
ENSDARG00000021110	3.425	2.795	1.39	POC1 centriolar protein B [Source:ZFIN;Acc:ZDB-GENE-031118-54]	-	GO:0005575//cellular_component;GO:0005622//intracellular;GO:0005623//cell;GO:0005856//cytoskeleton;GO:0043226//organelle;GO:0005737//cytoplasm;GO:0005815//microtubule organizing center	GO:0003674//molecular_function	GO:0008150//biological_process;GO:0042592//homeostatic process;GO:0000902//cell morphogenesis;GO:0022607//cellular component assembly;GO:0048646//anatomical structure formation involved in morphogenesis;GO:0048856//anatomical structure development
ENSDARG00000021112	25.02	8.995	12.345	-	-	-	-	-
ENSDARG00000021135	26.57	29.715	9.53	dehydrogenase/reductase (SDR family) member 2 [Source:ZFIN;Acc:ZDB-GENE-040426-1498]	ko01100//Metabolic pathways;ko04146//Peroxisome;ko00830//Retinol metabolism	-	GO:0016491//oxidoreductase activity;GO:0003674//molecular_function;GO:0016491//oxidoreductase activity;GO:0003674//molecular_function	GO:0008152//metabolic process;GO:0008150//biological_process;GO:0008152//metabolic process;GO:0008150//biological_process
ENSDARG00000021154	11.565	11.445	3.615	proline dehydrogenase (oxidase) 2 [Source:HGNC Symbol;Acc:HGNC:17325]	ko01100//Metabolic pathways;ko00330//Arginine and proline metabolism	GO:0005575//cellular_component;GO:0005575//cellular_component	GO:0004657//proline dehydrogenase activity;GO:0003674//molecular_function;GO:0016491//oxidoreductase activity	GO:0006562//proline catabolic process;GO:0006520//cellular amino acid metabolic process;GO:0008150//biological_process;GO:0009056//catabolic process;GO:0044281//small molecule metabolic process
ENSDARG00000021172	6.025	43.735	130.485	cytochrome P450, family 2, subfamily AD, polypeptide 2 [Source:ZFIN;Acc:ZDB-GENE-020812-2]	-	GO:0043231//intracellular membrane-bounded organelle;GO:0005737//cytoplasm;GO:0005575//cellular_component;GO:0005622//intracellular;GO:0005623//cell;GO:0005737//cytoplasm;GO:0043226//organelle	GO:0016491//oxidoreductase activity;GO:0004497//monooxygenase activity;GO:0016705//oxidoreductase activity, acting on paired donors, with incorporation or reduction of molecular oxygen;GO:0020037//heme binding;GO:0005506//iron ion binding;GO:0046872//metal ion binding;GO:0016712//oxidoreductase activity, acting on paired donors, with incorporation or reduction of molecular oxygen, reduced flavin …	GO:0055114//oxidation-reduction process;GO:0006805//xenobiotic metabolic process;GO:0019369//arachidonic acid metabolic process;GO:0042738//exogenous drug catabolic process;GO:0008150//biological_process;GO:0009056//catabolic process;GO:0006629//lipid metabolic process;GO:0044281//small molecule metabolic process
ENSDARG00000021200	0.475	0.46	1.09	nebulette [Source:ZFIN;Acc:ZDB-GENE-050320-151]	-	GO:0005575//cellular_component;GO:0005575//cellular_component	GO:0008270//zinc ion binding;GO:0046872//metal ion binding;GO:0003674//molecular_function;GO:0043167//ion binding	-
ENSDARG00000021232	1.665	0.74	0.55	NK2 transcription factor related 7 [Source:ZFIN;Acc:ZDB-GENE-990415-179]	-	GO:0005634//nucleus;GO:0005575//cellular_component;GO:0005622//intracellular;GO:0005623//cell;GO:0043226//organelle	GO:0003677//DNA binding;GO:0043565//sequence-specific DNA binding;GO:0003674//molecular_function	GO:0035050//embryonic heart tube development;GO:0055007//cardiac muscle cell differentiation;GO:0060038//cardiac muscle cell proliferation;GO:0003007//heart morphogenesis;GO:0001947//heart looping;GO:0006355//regulation of transcription, DNA-templated;GO:0008150//biological_process;GO:0009790//embryo development;GO:0048856//anatomical structure development;GO:0008283//cell proliferation;GO:004000…
ENSDARG00000021233	6.34	3.385	3.1	-	-	-	-	-
ENSDARG00000021250	15.21	33.18	10.685	solute carrier family 25, member 48 [Source:ZFIN;Acc:ZDB-GENE-040718-60]	-	GO:0005575//cellular_component;GO:0005622//intracellular;GO:0005623//cell;GO:0005737//cytoplasm;GO:0005739//mitochondrion;GO:0043226//organelle	-	GO:0006810//transport;GO:0008150//biological_process;GO:0055085//transmembrane transport
ENSDARG00000021287	9.365	13.055	19.04	zgc:91909 [Source:ZFIN;Acc:ZDB-GENE-040704-16]	ko04144//Endocytosis;ko05152//Tuberculosis;ko04145//Phagosome;ko05146//Amoebiasis	GO:0005774//vacuolar membrane;GO:0045335//phagocytic vesicle;GO:0005764//lysosome;GO:0005770//late endosome;GO:0005575//cellular_component;GO:0005622//intracellular;GO:0005623//cell;GO:0005737//cytoplasm;GO:0005768//endosome;GO:0043226//organelle;GO:0005764//lysosome;GO:0005773//vacuole;GO:0016023//cytoplasmic membrane-bounded vesicle;GO:0016020//membrane	GO:0005525//GTP binding;GO:0000166//nucleotide binding;GO:0003924//GTPase activity;GO:0003924//GTPase activity;GO:0003674//molecular_function;GO:0043167//ion binding	GO:0006886//intracellular protein transport;GO:0006886//intracellular protein transport;GO:0007264//small GTPase mediated signal transduction;GO:0090385//phagosome-lysosome fusion;GO:0032482//Rab protein signal transduction;GO:0008333//endosome to lysosome transport;GO:0015031//protein transport;GO:0006810//transport;GO:0008150//biological_process;GO:0007034//vacuolar transport;GO:0007165//signal…
ENSDARG00000021339	228.35	1963.61	2778.69	carboxypeptidase A5 [Source:ZFIN;Acc:ZDB-GENE-020514-1]	-	-	GO:0004180//carboxypeptidase activity;GO:0016787//hydrolase activity;GO:0008233//peptidase activity;GO:0004181//metallocarboxypeptidase activity;GO:0008270//zinc ion binding;GO:0003674//molecular_function;GO:0043167//ion binding	GO:0006508//proteolysis;GO:0008150//biological_process
ENSDARG00000021345	3.435	1.37	1.135	peripherin 2, like [Source:ZFIN;Acc:ZDB-GENE-041001-147]	-	GO:0016020//membrane;GO:0016021//integral component of membrane;GO:0005575//cellular_component	-	GO:0007601//visual perception;GO:0008150//biological_process;GO:0050877//neurological system process
ENSDARG00000021380	5.05	5.6	2.71	protein phosphatase, Mg2+/Mn2+ dependent, 1Db [Source:ZFIN;Acc:ZDB-GENE-041114-27]	ko04115//p53 signaling pathway	-	GO:0016787//hydrolase activity;GO:0003824//catalytic activity;GO:0046872//metal ion binding;GO:0004722//protein serine/threonine phosphatase activity;GO:0004721//phosphoprotein phosphatase activity;GO:0003674//molecular_function;GO:0016791//phosphatase activity;GO:0043167//ion binding	GO:0006470//protein dephosphorylation;GO:0006464//cellular protein modification process;GO:0008150//biological_process
ENSDARG00000021383	7.77	15.36	18.505	-	-	-	-	-
ENSDARG00000021408	6.71	5.545	2.4	KDEL (Lys-Asp-Glu-Leu) containing 2 [Source:ZFIN;Acc:ZDB-GENE-060810-142]	-	-	GO:0003674//molecular_function;GO:0003674//molecular_function	GO:0008150//biological_process;GO:0008150//biological_process
ENSDARG00000021483	56.95	53.295	26.575	-	ko04110//Cell cycle	-	-	-
ENSDARG00000021566	2.18	2.1	0.925	-	-	-	-	-
ENSDARG00000021677	0.345	1.21	1.06	-	-	-	GO:0003674//molecular_function;GO:0043167//ion binding	-
ENSDARG00000021787	12.35	10.385	25.89	-	-	-	-	-
ENSDARG00000021794	7.14	7.46	1.425	-	ko04512//ECM-receptor interaction	-	GO:0005540//hyaluronic acid binding;GO:0003674//molecular_function	-
ENSDARG00000021849	1.32	1.875	0.675	si:dkey-256h2.1 [Source:ZFIN;Acc:ZDB-GENE-030131-9466]	-	-	GO:0003674//molecular_function;GO:0016491//oxidoreductase activity	GO:0008150//biological_process
ENSDARG00000021866	0.29	0.935	1.165	uroplakin 1a [Source:ZFIN;Acc:ZDB-GENE-060421-2603]	-	GO:0016021//integral component of membrane;GO:0016020//membrane;GO:0005575//cellular_component	GO:0003674//molecular_function;GO:0003674//molecular_function	-
ENSDARG00000021895	0.66	1.205	1.475	-	-	-	-	GO:0021778//oligodendrocyte cell fate specification;GO:0021755//eurydendroid cell differentiation;GO:0060027//convergent extension involved in gastrulation;GO:0001755//neural crest cell migration;GO:0010001//glial cell differentiation;GO:0007399//nervous system development;GO:0048701//embryonic cranial skeleton morphogenesis;GO:0060351//cartilage development involved in endochondral bone morphoge…
ENSDARG00000021948	47.255	32.475	23.44	tenascin C [Source:ZFIN;Acc:ZDB-GENE-980526-104]	ko04510//Focal adhesion;ko04512//ECM-receptor interaction	GO:0005575//cellular_component;GO:0005575//cellular_component	-	GO:0007413//axonal fasciculation;GO:0007411//axon guidance;GO:0014814//axon regeneration at neuromuscular junction;GO:0001755//neural crest cell migration;GO:0045887//positive regulation of synaptic growth at neuromuscular junction;GO:0007498//mesoderm development;GO:0030517//negative regulation of axon extension;GO:0021554//optic nerve development;GO:0048680//positive regulation of axon regenera…
ENSDARG00000022045	4.095	2.205	7.665	-	-	GO:0005575//cellular_component;GO:0005622//intracellular;GO:0005623//cell;GO:0005856//cytoskeleton;GO:0043226//organelle;GO:0043234//protein complex	GO:0003674//molecular_function;GO:0008092//cytoskeletal protein binding	GO:0007010//cytoskeleton organization;GO:0008150//biological_process
ENSDARG00000022129	137.29	68.33	60.68	RNA binding motif protein 4.3 [Source:ZFIN;Acc:ZDB-GENE-040426-1938]	-	GO:0005575//cellular_component;GO:0005575//cellular_component	GO:0000166//nucleotide binding;GO:0005524//ATP binding;GO:0003676//nucleic acid binding;GO:0016772//transferase activity, transferring phosphorus-containing groups;GO:0004672//protein kinase activity;GO:0003674//molecular_function;GO:0016301//kinase activity;GO:0043167//ion binding	GO:0006468//protein phosphorylation;GO:0006464//cellular protein modification process;GO:0008150//biological_process
ENSDARG00000022183	2.925	9.965	18.27	glutathione S-transferase omega 1 [Source:ZFIN;Acc:ZDB-GENE-040718-365]	ko05200//Pathways in cancer;ko05215//Prostate cancer;ko00480//Glutathione metabolism;ko00980//Metabolism of xenobiotics by cytochrome P450;ko00982//Drug metabolism - cytochrome P450	GO:0005737//cytoplasm;GO:0005575//cellular_component;GO:0005622//intracellular;GO:0005623//cell	GO:0004364//glutathione transferase activity;GO:0003674//molecular_function;GO:0016765//transferase activity, transferring alkyl or aryl (other than methyl) groups	GO:0008152//metabolic process;GO:0008150//biological_process
ENSDARG00000022232	12.89	5.76	13.625	-	-	-	-	-
ENSDARG00000022261	19.115	85.49	146.35	-	-	-	-	-
ENSDARG00000022303	17.17	8.415	19.405	HIG1 hypoxia inducible domain family, member 1A [Source:ZFIN;Acc:ZDB-GENE-030826-15]	-	GO:0016020//membrane;GO:0016021//integral component of membrane;GO:0005575//cellular_component	-	-
ENSDARG00000022315	256.845	197.605	124.74	ATPase, H+ transporting, lysosomal, V1 subunit G1 [Source:ZFIN;Acc:ZDB-GENE-030131-6965]	ko01100//Metabolic pathways;ko04145//Phagosome;ko00190//Oxidative phosphorylation;ko05120//Epithelial cell signaling in Helicobacter pylori infection;ko05323//Rheumatoid arthritis;ko05110//Vibrio cholerae infection;ko04966//Collecting duct acid secretion	GO:0016471//vacuolar proton-transporting V-type ATPase complex;GO:0005575//cellular_component;GO:0005622//intracellular;GO:0005623//cell;GO:0005737//cytoplasm;GO:0005773//vacuole;GO:0043226//organelle;GO:0043234//protein complex	GO:0016820//hydrolase activity, acting on acid anhydrides, catalyzing transmembrane movement of substances;GO:0003674//molecular_function;GO:0022857//transmembrane transporter activity	GO:0015992//proton transport;GO:0006810//transport;GO:0008150//biological_process
ENSDARG00000022340	18.985	8	11.295	ubiquitin-fold modifier conjugating enzyme 1 [Source:ZFIN;Acc:ZDB-GENE-040801-268]	-	GO:0005575//cellular_component	GO:0003674//molecular_function	-
ENSDARG00000022410	33.5	27.15	59.705	-	-	-	-	GO:0008150//biological_process;GO:0008150//biological_process
ENSDARG00000022413	7.2	14.655	19.845	inhibitor of growth family, member 5a [Source:ZFIN;Acc:ZDB-GENE-031016-1]	-	GO:0005634//nucleus;GO:0070776//MOZ/MORF histone acetyltransferase complex;GO:0005575//cellular_component;GO:0005622//intracellular;GO:0005623//cell;GO:0005654//nucleoplasm;GO:0043226//organelle;GO:0043234//protein complex;GO:0005634//nucleus;GO:0070776//MOZ/MORF histone acetyltransferase complex;GO:0005575//cellular_component;GO:0005622//intracellular;GO:0005623//cell;GO:0005654//nucleoplasm;GO:…	GO:0046872//metal ion binding;GO:0008270//zinc ion binding;GO:0003674//molecular_function;GO:0043167//ion binding;GO:0046872//metal ion binding;GO:0008270//zinc ion binding;GO:0003674//molecular_function;GO:0043167//ion binding	GO:0016568//chromatin modification;GO:0008285//negative regulation of cell proliferation;GO:0016573//histone acetylation;GO:0006464//cellular protein modification process;GO:0008150//biological_process;GO:0051276//chromosome organization;GO:0016568//chromatin modification;GO:0008285//negative regulation of cell proliferation;GO:0016573//histone acetylation;GO:0006464//cellular protein modificatio…
ENSDARG00000022437	16.315	22.625	10.905	CD81 molecule b [Source:ZFIN;Acc:ZDB-GENE-040808-52]	-	GO:0016021//integral component of membrane;GO:0016020//membrane;GO:0005575//cellular_component	-	-
ENSDARG00000022461	3.17	1.5	0.96	-	-	-	-	-
ENSDARG00000022509	44.345	65.1	29.75	cytochrome c oxidase subunit IV isoform 2 [Source:ZFIN;Acc:ZDB-GENE-040426-1775]	ko01100//Metabolic pathways;ko05010//Alzheimer's disease;ko05016//Huntington's disease;ko00190//Oxidative phosphorylation;ko05012//Parkinson's disease;ko04260//Cardiac muscle contraction	GO:0005575//cellular_component;GO:0005575//cellular_component	GO:0004129//cytochrome-c oxidase activity;GO:0003674//molecular_function;GO:0016491//oxidoreductase activity;GO:0022857//transmembrane transporter activity	-
ENSDARG00000022525	9.87	4.37	5.09	-	-	GO:0005575//cellular_component	GO:0003674//molecular_function;GO:0004871//signal transducer activity	GO:0007165//signal transduction;GO:0008150//biological_process
ENSDARG00000022532	1.125	1.59	0.71	-	-	GO:0005892//acetylcholine-gated channel complex;GO:0030054//cell junction;GO:0005886//plasma membrane;GO:0016020//membrane;GO:0016021//integral component of membrane;GO:0045202//synapse;GO:0045211//postsynaptic membrane;GO:0005575//cellular_component;GO:0005623//cell;GO:0043234//protein complex	GO:0015464//acetylcholine receptor activity;GO:0005216//ion channel activity;GO:0005230//extracellular ligand-gated ion channel activity;GO:0004889//acetylcholine-activated cation-selective channel activity;GO:0003674//molecular_function;GO:0022857//transmembrane transporter activity;GO:0004871//signal transducer activity	GO:0006811//ion transport;GO:0006810//transport;GO:0008150//biological_process
ENSDARG00000022550	2.035	1.6	0.565	glucoside xylosyltransferase 1b [Source:ZFIN;Acc:ZDB-GENE-041210-116]	ko00514//Other types of O-glycan biosynthesis	GO:0005575//cellular_component	GO:0003674//molecular_function;GO:0016757//transferase activity, transferring glycosyl groups	GO:0005975//carbohydrate metabolic process;GO:0006464//cellular protein modification process;GO:0008150//biological_process;GO:0009058//biosynthetic process
ENSDARG00000022564	17.655	9.62	8.785	-	-	-	-	-
ENSDARG00000022614	1.87	1.43	0.83	-	-	-	GO:0004386//helicase activity;GO:0003676//nucleic acid binding;GO:0005524//ATP binding;GO:0016787//hydrolase activity;GO:0000166//nucleotide binding;GO:0003723//RNA binding;GO:0003674//molecular_function;GO:0043167//ion binding	-
ENSDARG00000022684	834.505	672.925	327.125	FK506 binding protein 1Aa [Source:ZFIN;Acc:ZDB-GENE-030131-7275]	-	GO:0005789//endoplasmic reticulum membrane;GO:0005575//cellular_component;GO:0005622//intracellular;GO:0005623//cell;GO:0005737//cytoplasm;GO:0005783//endoplasmic reticulum;GO:0043226//organelle;GO:0005789//endoplasmic reticulum membrane;GO:0005575//cellular_component;GO:0005622//intracellular;GO:0005623//cell;GO:0005737//cytoplasm;GO:0005783//endoplasmic reticulum;GO:0043226//organelle;GO:000578…	GO:0019855//calcium channel inhibitor activity;GO:0005528//FK506 binding;GO:0003755//peptidyl-prolyl cis-trans isomerase activity;GO:0016853//isomerase activity;GO:0003674//molecular_function;GO:0019855//calcium channel inhibitor activity;GO:0005528//FK506 binding;GO:0003755//peptidyl-prolyl cis-trans isomerase activity;GO:0016853//isomerase activity;GO:0003674//molecular_function;GO:0019855//cal…	GO:0000413//protein peptidyl-prolyl isomerization;GO:0061077//chaperone-mediated protein folding;GO:0006457//protein folding;GO:0051280//negative regulation of release of sequestered calcium ion into cytosol;GO:0008150//biological_process;GO:0006464//cellular protein modification process;GO:0000413//protein peptidyl-prolyl isomerization;GO:0061077//chaperone-mediated protein folding;GO:0006457//p…
ENSDARG00000022698	5.3	10.62	11.005	-	-	-	-	-
ENSDARG00000022718	2.02	1.3	3.315	caspase 8 associated protein 2 [Source:ZFIN;Acc:ZDB-GENE-030826-8]	-	-	GO:0003682//chromatin binding;GO:0003677//DNA binding;GO:0003674//molecular_function	GO:0008150//biological_process;GO:0008150//biological_process
ENSDARG00000022730	1.345	1.345	0.395	-	-	-	-	-
ENSDARG00000022810	15.955	12.84	6.65	-	-	-	-	-
ENSDARG00000022951	1.065	4.4	3.735	parathyroid hormone 2 [Source:ZFIN;Acc:ZDB-GENE-041102-1]	-	GO:0005576//extracellular region;GO:0005575//cellular_component	GO:0048018//receptor agonist activity;GO:0003674//molecular_function	GO:0006171//cAMP biosynthetic process;GO:0007165//signal transduction;GO:0007218//neuropeptide signaling pathway;GO:0007165//signal transduction;GO:0008150//biological_process;GO:0009058//biosynthetic process;GO:0034641//cellular nitrogen compound metabolic process;GO:0044281//small molecule metabolic process
ENSDARG00000023003	25.03	10.79	13.16	coiled-coil domain containing 12 [Source:ZFIN;Acc:ZDB-GENE-040801-108]	ko03040//Spliceosome	GO:0005575//cellular_component;GO:0005575//cellular_component	GO:0003674//molecular_function;GO:0003674//molecular_function	GO:0008150//biological_process;GO:0008150//biological_process
ENSDARG00000023026	2.835	2.435	1.28	plakophilin 2 [Source:ZFIN;Acc:ZDB-GENE-041210-167]	-	-	-	GO:0007507//heart development;GO:0016337//single organismal cell-cell adhesion;GO:0001947//heart looping;GO:0008150//biological_process;GO:0009790//embryo development;GO:0048856//anatomical structure development;GO:0034330;GO:0007155//cell adhesion
ENSDARG00000023031	3.49	1.995	1.735	-	-	-	-	-
ENSDARG00000023151	76.95	505.675	755.345	uncoupling protein 1 [Source:ZFIN;Acc:ZDB-GENE-010503-1]	-	GO:0016020//membrane;GO:0031966//mitochondrial membrane;GO:0016021//integral component of membrane;GO:0005575//cellular_component;GO:0005622//intracellular;GO:0005623//cell;GO:0005737//cytoplasm;GO:0005739//mitochondrion;GO:0043226//organelle	-	GO:0006839//mitochondrial transport;GO:0071391//cellular response to estrogen stimulus;GO:0006810//transport;GO:0008150//biological_process
ENSDARG00000023152	3.76	3.36	1.845	-	-	-	-	-
ENSDARG00000023157	1.62	0.91	3.66	si:rp71-1g18.7 [Source:ZFIN;Acc:ZDB-GENE-040724-112]	-	GO:0005575//cellular_component;GO:0005575//cellular_component;GO:0005575//cellular_component;GO:0005575//cellular_component;GO:0005575//cellular_component;GO:0005575//cellular_component	GO:0003674//molecular_function;GO:0003674//molecular_function;GO:0003674//molecular_function;GO:0003674//molecular_function;GO:0003674//molecular_function;GO:0003674//molecular_function	GO:0008150//biological_process;GO:0008150//biological_process;GO:0008150//biological_process;GO:0008150//biological_process;GO:0008150//biological_process;GO:0008150//biological_process
ENSDARG00000023160	17.66	8.91	8.225	small nuclear ribonucleoprotein 40 (U5) [Source:ZFIN;Acc:ZDB-GENE-040426-978]	ko03040//Spliceosome	GO:0019012//virion;GO:0019013//viral nucleocapsid;GO:0030529//ribonucleoprotein complex;GO:0005575//cellular_component;GO:0005622//intracellular;GO:0005623//cell	-	GO:0008150//biological_process;GO:0008150//biological_process
ENSDARG00000023176	0.41	5.07	30.375	-	ko01100//Metabolic pathways;ko00380//Tryptophan metabolism	-	-	-
ENSDARG00000023181	30.405	18.38	15.11	-	-	-	-	-
ENSDARG00000023217	7.255	7.78	22.28	cAMP responsive element modulator a [Source:ZFIN;Acc:ZDB-GENE-030131-7031]	-	GO:0005575//cellular_component;GO:0005622//intracellular;GO:0005623//cell;GO:0005634//nucleus;GO:0043226//organelle	GO:0003674//molecular_function;GO:0003677//DNA binding;GO:0001071//nucleic acid binding transcription factor activity	GO:0008150//biological_process
ENSDARG00000023220	47.665	43.525	22.98	-	-	-	-	-
ENSDARG00000023279	58.865	37.875	27.59	proteasome (prosome, macropain) 26S subunit, non-ATPase, 4b [Source:ZFIN;Acc:ZDB-GENE-050417-96]	ko03050//Proteasome	GO:0000502//proteasome complex;GO:0008540//proteasome regulatory particle, base subcomplex;GO:0005575//cellular_component;GO:0005622//intracellular;GO:0005623//cell;GO:0043234//protein complex	-	GO:0006511//ubiquitin-dependent protein catabolic process;GO:0008150//biological_process;GO:0009056//catabolic process
ENSDARG00000023299	119.28	51.9	87.365	NHP2 non-histone chromosome protein 2-like 1b (S. cerevisiae) [Source:ZFIN;Acc:ZDB-GENE-030131-9670]	ko03040//Spliceosome;ko03008//Ribosome biogenesis in eukaryotes	GO:0030529//ribonucleoprotein complex;GO:0005730//nucleolus;GO:0005575//cellular_component;GO:0005622//intracellular;GO:0005623//cell;GO:0005634//nucleus;GO:0043226//organelle	GO:0003723//RNA binding;GO:0003674//molecular_function	GO:0061053//somite development;GO:0042254//ribosome biogenesis;GO:0008150//biological_process;GO:0009790//embryo development;GO:0048856//anatomical structure development
ENSDARG00000023303	9.295	7.235	4.475	zgc:66427 [Source:ZFIN;Acc:ZDB-GENE-040426-1913]	-	-	GO:0046872//metal ion binding;GO:0008270//zinc ion binding;GO:0003674//molecular_function;GO:0043167//ion binding	-
ENSDARG00000023318	1.73	1.31	3.72	-	-	GO:0005575//cellular_component;GO:0005622//intracellular;GO:0005623//cell;GO:0005856//cytoskeleton;GO:0043226//organelle;GO:0043234//protein complex	-	GO:0007010//cytoskeleton organization;GO:0008150//biological_process
ENSDARG00000023472	110.215	70.185	54.385	-	-	-	-	-
ENSDARG00000023532	15.185	10.155	37.08	PIN2/TERF1 interacting, telomerase inhibitor 1 [Source:ZFIN;Acc:ZDB-GENE-030515-2]	-	GO:0005730//nucleolus;GO:0005575//cellular_component;GO:0005622//intracellular;GO:0005623//cell;GO:0005634//nucleus;GO:0005730//nucleolus;GO:0043226//organelle	GO:0005515//protein binding;GO:0010521//telomerase inhibitor activity;GO:0003676//nucleic acid binding;GO:0003674//molecular_function;GO:0030234//enzyme regulator activity	-
ENSDARG00000023656	2.72	0.155	0.25	hatching enzyme 1a [Source:ZFIN;Acc:ZDB-GENE-021211-3]	-	-	GO:0016787//hydrolase activity;GO:0008233//peptidase activity;GO:0008237//metallopeptidase activity;GO:0046872//metal ion binding;GO:0008270//zinc ion binding;GO:0004222//metalloendopeptidase activity;GO:0003674//molecular_function;GO:0043167//ion binding	GO:0006508//proteolysis;GO:0008150//biological_process
ENSDARG00000023672	32.73	14.965	20.265	translocase of inner mitochondrial membrane 8 homolog A (yeast) [Source:ZFIN;Acc:ZDB-GENE-040801-158]	-	GO:0005575//cellular_component;GO:0005622//intracellular;GO:0005623//cell;GO:0005737//cytoplasm;GO:0005739//mitochondrion;GO:0043226//organelle	GO:0003674//molecular_function;GO:0043167//ion binding	GO:0006810//transport;GO:0008150//biological_process
ENSDARG00000023712	8.135	31.765	63.185	monoamine oxidase [Source:ZFIN;Acc:ZDB-GENE-040329-3]	ko01100//Metabolic pathways;ko00330//Arginine and proline metabolism;ko00380//Tryptophan metabolism;ko00260//Glycine, serine and threonine metabolism;ko00982//Drug metabolism - cytochrome P450;ko00350//Tyrosine metabolism;ko00340//Histidine metabolism;ko00360//Phenylalanine metabolism	GO:0005575//cellular_component;GO:0005622//intracellular;GO:0005623//cell;GO:0005737//cytoplasm;GO:0005739//mitochondrion;GO:0043226//organelle	GO:0003674//molecular_function;GO:0016491//oxidoreductase activity	GO:0008150//biological_process;GO:0009056//catabolic process;GO:0034641//cellular nitrogen compound metabolic process
ENSDARG00000023759	1.145	3.23	7.77	zgc:73226 [Source:ZFIN;Acc:ZDB-GENE-050703-8]	-	GO:0005635//nuclear envelope;GO:0016021//integral component of membrane;GO:0005783//endoplasmic reticulum;GO:0005741//mitochondrial outer membrane;GO:0005740//mitochondrial envelope;GO:0005575//cellular_component;GO:0005622//intracellular;GO:0005623//cell;GO:0005737//cytoplasm;GO:0005739//mitochondrion;GO:0043226//organelle;GO:0005783//endoplasmic reticulum;GO:0005634//nucleus;GO:0005635//nuclear…	GO:0003674//molecular_function;GO:0003674//molecular_function	GO:0043069//negative regulation of programmed cell death;GO:0051607//defense response to virus;GO:0043065//positive regulation of apoptotic process;GO:0006810//transport;GO:0007005//mitochondrion organization;GO:0007165//signal transduction;GO:0008150//biological_process;GO:0008219//cell death;GO:0061024//membrane organization;GO:0002376//immune system process;GO:0006950//response to stress
ENSDARG00000023768	1.695	5.55	4.565	-	-	-	-	-
ENSDARG00000023797	5.835	8.025	12.135	ryanodine receptor 1b (skeletal) [Source:ZFIN;Acc:ZDB-GENE-070705-417]	ko04020//Calcium signaling pathway;ko04730//Long-term depression	GO:0016020//membrane;GO:0016021//integral component of membrane;GO:0005575//cellular_component	GO:0005216//ion channel activity;GO:0005219//ryanodine-sensitive calcium-release channel activity;GO:0005515//protein binding;GO:0005262//calcium channel activity;GO:0003674//molecular_function;GO:0022857//transmembrane transporter activity	GO:0070588//calcium ion transmembrane transport;GO:0006811//ion transport;GO:0031443//fast-twitch skeletal muscle fiber contraction;GO:0034599//cellular response to oxidative stress;GO:0055085//transmembrane transport;GO:0006874//cellular calcium ion homeostasis;GO:0008345//larval locomotory behavior;GO:0006810//transport;GO:0008150//biological_process;GO:0042592//homeostatic process;GO:0006950//…
ENSDARG00000023820	39.105	111.11	161.425	fatty acid hydroxylase domain containing 2 [Source:ZFIN;Acc:ZDB-GENE-040426-2907]	ko01100//Metabolic pathways;ko00100//Steroid biosynthesis	GO:0016021//integral component of membrane;GO:0016020//membrane;GO:0005575//cellular_component	GO:0016491//oxidoreductase activity;GO:0005506//iron ion binding;GO:0003674//molecular_function;GO:0043167//ion binding	GO:0006633//fatty acid biosynthetic process;GO:0055114//oxidation-reduction process;GO:0008150//biological_process;GO:0006629//lipid metabolic process;GO:0009058//biosynthetic process;GO:0044281//small molecule metabolic process
ENSDARG00000023852	75.87	42.915	29.45	-	ko03040//Spliceosome;ko03018//RNA degradation	-	GO:0003674//molecular_function;GO:0003674//molecular_function	-
ENSDARG00000024032	10.485	21.495	23.58	-	-	-	-	-
ENSDARG00000024141	91.08	81.73	38.15	caveolin 3 [Source:ZFIN;Acc:ZDB-GENE-050522-426]	ko04144//Endocytosis;ko04510//Focal adhesion;ko05100//Bacterial invasion of epithelial cells	GO:0005901//caveola;GO:0005794//Golgi apparatus;GO:0005886//plasma membrane;GO:0042383//sarcolemma;GO:0000139//Golgi membrane;GO:0016020//membrane;GO:0005575//cellular_component;GO:0005622//intracellular;GO:0005623//cell;GO:0005737//cytoplasm;GO:0043226//organelle	GO:0003674//molecular_function;GO:0003674//molecular_function	GO:0042693//muscle cell fate commitment;GO:0007520//myoblast fusion;GO:0060035//notochord cell development;GO:0045214//sarcomere organization;GO:0007010//cytoskeleton organization;GO:0008150//biological_process;GO:0022607//cellular component assembly;GO:0030154//cell differentiation;GO:0048646//anatomical structure formation involved in morphogenesis;GO:0048856//anatomical structure development;G…
ENSDARG00000024160	59.95	45.315	17.015	hydroxyacid oxidase (glycolate oxidase) 1 [Source:ZFIN;Acc:ZDB-GENE-060519-2]	ko01100//Metabolic pathways;ko04146//Peroxisome;ko00630//Glyoxylate and dicarboxylate metabolism	-	GO:0016491//oxidoreductase activity;GO:0003824//catalytic activity;GO:0010181//FMN binding;GO:0003674//molecular_function;GO:0043167//ion binding	GO:0055114//oxidation-reduction process;GO:0008150//biological_process
ENSDARG00000024195	20.405	8.965	44.13	zinc finger protein 395b [Source:ZFIN;Acc:ZDB-GENE-041001-193]	-	-	GO:0046872//metal ion binding;GO:0003674//molecular_function;GO:0043167//ion binding	-
ENSDARG00000024277	3.695	2.5	1.715	phosphatidylinositol glycan anchor biosynthesis, class M [Source:ZFIN;Acc:ZDB-GENE-040426-1393]	ko01100//Metabolic pathways;ko00563//Glycosylphosphatidylinositol(GPI)-anchor biosynthesis	GO:0005575//cellular_component;GO:0005622//intracellular;GO:0005623//cell;GO:0005737//cytoplasm;GO:0005783//endoplasmic reticulum;GO:0043226//organelle	GO:0003674//molecular_function;GO:0016757//transferase activity, transferring glycosyl groups;GO:0016798//hydrolase activity, acting on glycosyl bonds	GO:0006464//cellular protein modification process;GO:0006629//lipid metabolic process;GO:0008150//biological_process;GO:0009058//biosynthetic process
ENSDARG00000024381	7.22	4.05	9.13	misato 1, mitochondrial distribution and morphology regulator [Source:ZFIN;Acc:ZDB-GENE-030131-6238]	-	GO:0005575//cellular_component;GO:0005622//intracellular;GO:0005623//cell;GO:0005737//cytoplasm;GO:0005739//mitochondrion;GO:0043226//organelle	-	-
ENSDARG00000024431	6.575	5.46	3.225	-	-	-	-	-
ENSDARG00000024443	20.655	19.37	8.415	glucosamine-6-phosphate deaminase 2 [Source:ZFIN;Acc:ZDB-GENE-091117-41]	ko01100//Metabolic pathways;ko00520//Amino sugar and nucleotide sugar metabolism	GO:0005575//cellular_component;GO:0005622//intracellular;GO:0005623//cell;GO:0005737//cytoplasm	GO:0003674//molecular_function;GO:0016853//isomerase activity	GO:0005975//carbohydrate metabolic process;GO:0008150//biological_process
ENSDARG00000024471	4.47	2.67	1.26	-	-	-	-	-
ENSDARG00000024478	212.06	151.055	94.085	mitochondrial pyruvate carrier 2 [Source:ZFIN;Acc:ZDB-GENE-030131-330]	-	GO:0005743//mitochondrial inner membrane;GO:0005575//cellular_component;GO:0005622//intracellular;GO:0005623//cell;GO:0005737//cytoplasm;GO:0005739//mitochondrion;GO:0043226//organelle	GO:0003674//molecular_function;GO:0003674//molecular_function	GO:0006850//mitochondrial pyruvate transport;GO:0006810//transport;GO:0008150//biological_process
ENSDARG00000024488	25.125	30.365	4.435	-	-	-	-	-
ENSDARG00000024492	269.64	210.615	56.275	-	-	GO:0005581//collagen trimer;GO:0005575//cellular_component;GO:0043234//protein complex	-	-
ENSDARG00000024503	0.835	34.635	139.89	six-cysteine containing astacin protease 3 [Source:ZFIN;Acc:ZDB-GENE-050320-99]	-	GO:0005575//cellular_component;GO:0005575//cellular_component	GO:0016787//hydrolase activity;GO:0008233//peptidase activity;GO:0008270//zinc ion binding;GO:0046872//metal ion binding;GO:0008237//metallopeptidase activity;GO:0004222//metalloendopeptidase activity;GO:0003674//molecular_function;GO:0043167//ion binding	GO:0006508//proteolysis;GO:0008150//biological_process
ENSDARG00000024537	8.69	5.54	3.605	elastin microfibril interfacer 1a [Source:ZFIN;Acc:ZDB-GENE-041001-191]	-	GO:0005576//extracellular region;GO:0005581//collagen trimer;GO:0005575//cellular_component;GO:0043234//protein complex	GO:0003674//molecular_function;GO:0003674//molecular_function	GO:0030097//hemopoiesis;GO:0002376//immune system process;GO:0008150//biological_process;GO:0048856//anatomical structure development
ENSDARG00000024598	12.785	7.265	5.9	homeobox and leucine zipper encoding b [Source:ZFIN;Acc:ZDB-GENE-030131-9225]	-	GO:0005634//nucleus;GO:0005575//cellular_component;GO:0005622//intracellular;GO:0005623//cell;GO:0005634//nucleus;GO:0043226//organelle	GO:0003677//DNA binding;GO:0003714//transcription corepressor activity;GO:0003700//sequence-specific DNA binding transcription factor activity;GO:0001071//nucleic acid binding transcription factor activity;GO:0003674//molecular_function;GO:0000988//protein binding transcription factor activity	GO:0000122//negative regulation of transcription from RNA polymerase II promoter;GO:0008150//biological_process
ENSDARG00000024681	11.175	10.385	2.33	-	-	-	-	-
ENSDARG00000024746	69.295	20.975	111.57	-	ko05200//Pathways in cancer;ko04141//Protein processing in endoplasmic reticulum;ko05215//Prostate cancer;ko04914//Progesterone-mediated oocyte maturation;ko04621//NOD-like receptor signaling pathway;ko04612//Antigen processing and presentation	-	GO:0005515//protein binding;GO:0051082//unfolded protein binding;GO:0005524//ATP binding;GO:0003674//molecular_function;GO:0043167//ion binding	GO:0006950//response to stress;GO:0006457//protein folding;GO:0008150//biological_process
ENSDARG00000024815	0.025	0.31	0.99	opioid growth factor receptor-like 2 [Source:ZFIN;Acc:ZDB-GENE-030616-523]	-	GO:0016020//membrane;GO:0005575//cellular_component	GO:0004872//receptor activity;GO:0003674//molecular_function	GO:0008150//biological_process;GO:0008150//biological_process
ENSDARG00000024818	4.095	3.78	2	Rab interacting lysosomal protein-like 2 [Source:ZFIN;Acc:ZDB-GENE-030131-6682]	-	GO:0005575//cellular_component;GO:0005622//intracellular;GO:0005623//cell;GO:0005856//cytoskeleton;GO:0043226//organelle;GO:0005815//microtubule organizing center;GO:0005737//cytoplasm;GO:0005929//cilium	-	GO:0006810//transport;GO:0008150//biological_process;GO:0000902//cell morphogenesis;GO:0030154//cell differentiation;GO:0048856//anatomical structure development
ENSDARG00000024829	83.855	64.31	32.59	-	ko04510//Focal adhesion;ko04512//ECM-receptor interaction	-	-	-
ENSDARG00000024870	15.54	9.22	4.585	-	-	-	-	-
ENSDARG00000024904	1.02	1.09	0.435	scl/tal1 interrupting locus [Source:ZFIN;Acc:ZDB-GENE-020419-39]	-	GO:0005575//cellular_component;GO:0005622//intracellular;GO:0005623//cell;GO:0005737//cytoplasm	GO:0003674//molecular_function	GO:0007165//signal transduction;GO:0008150//biological_process;GO:0042592//homeostatic process;GO:0006461//protein complex assembly;GO:0007010//cytoskeleton organization;GO:0007049//cell cycle;GO:0022607//cellular component assembly;GO:0065003;GO:0048856//anatomical structure development
ENSDARG00000025012	29.93	27.965	13.12	-	ko01100//Metabolic pathways;ko00010//Glycolysis / Gluconeogenesis;ko00562//Inositol phosphate metabolism;ko00051//Fructose and mannose metabolism	-	GO:0003674//molecular_function;GO:0016853//isomerase activity	GO:0008150//biological_process;GO:0034641//cellular nitrogen compound metabolic process;GO:0044281//small molecule metabolic process;GO:0051186//cofactor metabolic process;GO:0005975//carbohydrate metabolic process;GO:0006091//generation of precursor metabolites and energy;GO:0009056//catabolic process;GO:0034655;GO:0009058//biosynthetic process
ENSDARG00000025043	7.035	6.48	2.895	-	-	-	-	-
ENSDARG00000025046	0.32	1.045	3.16	-	-	-	-	-
ENSDARG00000025081	16.03	15	7.965	granulin b [Source:ZFIN;Acc:ZDB-GENE-030131-7393]	-	-	-	GO:0048675//axon extension;GO:0000902//cell morphogenesis;GO:0008150//biological_process;GO:0030154//cell differentiation;GO:0040007//growth;GO:0048856//anatomical structure development
ENSDARG00000025089	2.4	2.27	1.08	-	-	-	-	-
ENSDARG00000025131	4.1	3.93	1.71	ladybird homeobox 2 [Source:ZFIN;Acc:ZDB-GENE-001206-2]	-	GO:0005634//nucleus;GO:0005575//cellular_component;GO:0005622//intracellular;GO:0005623//cell;GO:0043226//organelle	GO:0003677//DNA binding;GO:0043565//sequence-specific DNA binding;GO:0003674//molecular_function	GO:0055001//muscle cell development;GO:0006355//regulation of transcription, DNA-templated;GO:0008150//biological_process;GO:0030154//cell differentiation;GO:0048856//anatomical structure development
ENSDARG00000025285	14.645	13.98	6.665	pannexin 1a [Source:ZFIN;Acc:ZDB-GENE-040426-766]	-	GO:0016020//membrane;GO:0005886//plasma membrane;GO:0012505//endomembrane system;GO:0005921//gap junction;GO:0032587//ruffle membrane;GO:0005575//cellular_component;GO:0005623//cell;GO:0005886//plasma membrane	GO:0055077//gap junction hemi-channel activity;GO:0022832//voltage-gated channel activity;GO:0022829//wide pore channel activity;GO:0015267//channel activity;GO:0003674//molecular_function;GO:0022857//transmembrane transporter activity	GO:0007267//cell-cell signaling;GO:0006812//cation transport;GO:0006810//transport;GO:0008150//biological_process;GO:0007267//cell-cell signaling
ENSDARG00000025301	116.655	83.135	57.925	-	-	-	-	-
ENSDARG00000025311	0.175	4.325	22.05	-	-	-	GO:0003674//molecular_function	GO:0002376//immune system process;GO:0008150//biological_process
ENSDARG00000025332	10.83	7.575	18.295	RNA binding motif protein 28 [Source:ZFIN;Acc:ZDB-GENE-040426-960]	ko03008//Ribosome biogenesis in eukaryotes	GO:0005575//cellular_component;GO:0005575//cellular_component	GO:0000166//nucleotide binding;GO:0003676//nucleic acid binding;GO:0003674//molecular_function	-
ENSDARG00000025340	40.875	28.45	19.365	-	-	GO:0005575//cellular_component;GO:0005575//cellular_component	GO:0003674//molecular_function;GO:0003674//molecular_function	GO:0008150//biological_process;GO:0008150//biological_process
ENSDARG00000025375	78.86	193.075	199.04	isocitrate dehydrogenase 1 (NADP+), soluble [Source:ZFIN;Acc:ZDB-GENE-031006-1]	ko01100//Metabolic pathways;ko04146//Peroxisome;ko00480//Glutathione metabolism;ko00020//Citrate cycle (TCA cycle)	-	GO:0016491//oxidoreductase activity;GO:0000287//magnesium ion binding;GO:0046872//metal ion binding;GO:0016616//oxidoreductase activity, acting on the CH-OH group of donors, NAD or NADP as acceptor;GO:0051287//NAD binding;GO:0004450//isocitrate dehydrogenase (NADP+) activity;GO:0003674//molecular_function;GO:0043167//ion binding	GO:0006099//tricarboxylic acid cycle;GO:0055114//oxidation-reduction process;GO:0006102//isocitrate metabolic process;GO:0008150//biological_process;GO:0044281//small molecule metabolic process;GO:0006091//generation of precursor metabolites and energy
ENSDARG00000025465	1.5	1.485	0.64	spondin 2a, extracellular matrix protein [Source:ZFIN;Acc:ZDB-GENE-990415-160]	-	GO:0005578//proteinaceous extracellular matrix;GO:0005575//cellular_component;GO:0005576//extracellular region;GO:0005578//proteinaceous extracellular matrix	GO:0003674//molecular_function;GO:0003674//molecular_function	-
ENSDARG00000025467	10.76	7.085	17.15	apoptosis antagonizing transcription factor [Source:ZFIN;Acc:ZDB-GENE-030131-9654]	-	GO:0005634//nucleus;GO:0005575//cellular_component;GO:0005622//intracellular;GO:0005623//cell;GO:0043226//organelle	-	-
ENSDARG00000025478	0.625	0.565	1.225	-	ko04080//Neuroactive ligand-receptor interaction	GO:0005575//cellular_component;GO:0005623//cell;GO:0005886//plasma membrane	GO:0003674//molecular_function;GO:0004871//signal transducer activity	GO:0007165//signal transduction;GO:0008150//biological_process
ENSDARG00000025495	17.25	12.33	7.01	nescient helix loop helix 2 [Source:ZFIN;Acc:ZDB-GENE-040426-1809]	-	-	GO:0046983//protein dimerization activity;GO:0003674//molecular_function	-
ENSDARG00000025554	104.105	51.76	44.33	-	-	GO:0005575//cellular_component;GO:0005575//cellular_component	GO:0003674//molecular_function;GO:0003674//molecular_function	GO:0008150//biological_process;GO:0008150//biological_process
ENSDARG00000025595	8.705	65.785	68.44	-	-	-	-	-
ENSDARG00000025608	1.63	4.4	7.59	caspase 6, apoptosis-related cysteine peptidase, like 1 [Source:ZFIN;Acc:ZDB-GENE-041010-48]	-	GO:0005737//cytoplasm;GO:0005575//cellular_component;GO:0005622//intracellular;GO:0005623//cell;GO:0005737//cytoplasm	GO:0004197//cysteine-type endopeptidase activity;GO:0097200//cysteine-type endopeptidase activity involved in execution phase of apoptosis;GO:0008234//cysteine-type peptidase activity;GO:0003674//molecular_function;GO:0008233//peptidase activity	GO:0006508//proteolysis;GO:0006915//apoptotic process;GO:0097194//execution phase of apoptosis;GO:0008150//biological_process;GO:0008219//cell death
ENSDARG00000025672	1.705	3.14	0.83	anthrax toxin receptor 1a [Source:ZFIN;Acc:ZDB-GENE-110411-15]	-	GO:0005575//cellular_component	-	-
ENSDARG00000025679	3.925	4.28	1.525	-	ko01100//Metabolic pathways;ko00140//Steroid hormone biosynthesis;ko00350//Tyrosine metabolism	GO:0005575//cellular_component;GO:0005575//cellular_component	GO:0008168//methyltransferase activity;GO:0000287//magnesium ion binding;GO:0016740//transferase activity;GO:0016206//catechol O-methyltransferase activity;GO:0008171//O-methyltransferase activity;GO:0003674//molecular_function;GO:0043167//ion binding	GO:0006584//catecholamine metabolic process;GO:0032259//methylation;GO:0042135//neurotransmitter catabolic process;GO:0008150//biological_process;GO:0009056//catabolic process
ENSDARG00000025797	3.255	2.545	10	abhydrolase domain containing 2a [Source:ZFIN;Acc:ZDB-GENE-040426-784]	-	GO:0005575//cellular_component	GO:0003674//molecular_function;GO:0016798//hydrolase activity, acting on glycosyl bonds	-
ENSDARG00000025912	13.3	6.58	4.315	Bernardinelli-Seip congenital lipodystrophy 2, like [Source:ZFIN;Acc:ZDB-GENE-050320-130]	-	GO:0005575//cellular_component;GO:0005575//cellular_component	-	-
ENSDARG00000026017	0.7	10.56	12.34	-	-	GO:0005575//cellular_component;GO:0005575//cellular_component	GO:0016787//hydrolase activity;GO:0046872//metal ion binding;GO:0003674//molecular_function;GO:0043167//ion binding	-
ENSDARG00000026049	0.03	0.71	0.415	myxovirus (influenza virus) resistance F [Source:ZFIN;Acc:ZDB-GENE-030721-9]	-	-	GO:0003674//molecular_function;GO:0003924//GTPase activity;GO:0043167//ion binding	-
ENSDARG00000026068	51.26	32.345	25.15	trafficking protein particle complex 5 [Source:ZFIN;Acc:ZDB-GENE-040718-185]	-	GO:0005575//cellular_component;GO:0005575//cellular_component	-	-
ENSDARG00000026072	64.605	31.985	41.9	programmed cell death 5 [Source:ZFIN;Acc:ZDB-GENE-040426-980]	-	-	GO:0003677//DNA binding;GO:0003674//molecular_function	GO:0008150//biological_process;GO:0008150//biological_process
ENSDARG00000026137	3.365	2.59	1.58	sideroflexin 5b [Source:ZFIN;Acc:ZDB-GENE-050706-107]	-	GO:0005739//mitochondrion;GO:0016020//membrane;GO:0016021//integral component of membrane;GO:0005575//cellular_component;GO:0005622//intracellular;GO:0005623//cell;GO:0005737//cytoplasm;GO:0043226//organelle	GO:0015075//ion transmembrane transporter activity;GO:0003674//molecular_function;GO:0022857//transmembrane transporter activity	GO:0055085//transmembrane transport;GO:0006811//ion transport;GO:0006810//transport;GO:0008150//biological_process
ENSDARG00000026165	241.67	194.305	62.015	-	ko04510//Focal adhesion;ko05146//Amoebiasis;ko04512//ECM-receptor interaction;ko04974//Protein digestion and absorption	GO:0005581//collagen trimer;GO:0005575//cellular_component;GO:0043234//protein complex;GO:0005581//collagen trimer;GO:0005575//cellular_component;GO:0043234//protein complex	GO:0005201//extracellular matrix structural constituent;GO:0003674//molecular_function;GO:0005198//structural molecule activity;GO:0005201//extracellular matrix structural constituent;GO:0003674//molecular_function;GO:0005198//structural molecule activity	-
ENSDARG00000026224	2.645	3.885	1.71	-	-	GO:0005575//cellular_component;GO:0005575//cellular_component	GO:0003674//molecular_function;GO:0003674//molecular_function	GO:0006281//DNA repair;GO:0006259//DNA metabolic process;GO:0006950//response to stress;GO:0008150//biological_process;GO:0034641//cellular nitrogen compound metabolic process
ENSDARG00000026229	11.925	41.675	46.98	prion protein a [Source:ZFIN;Acc:ZDB-GENE-041217-6]	-	-	GO:0004784//superoxide dismutase activity;GO:0005507//copper ion binding;GO:0003674//molecular_function;GO:0043167//ion binding;GO:0016491//oxidoreductase activity	-
ENSDARG00000026322	23.93	12.48	37.515	-	-	GO:0005575//cellular_component;GO:0005575//cellular_component	GO:0016491//oxidoreductase activity;GO:0003674//molecular_function	GO:0008152//metabolic process;GO:0008150//biological_process
ENSDARG00000026325	7.08	7.445	1.7	matrix metallopeptidase 11a [Source:ZFIN;Acc:ZDB-GENE-070817-3]	-	GO:0005575//cellular_component	GO:0003674//molecular_function;GO:0043167//ion binding;GO:0008233//peptidase activity	GO:0008150//biological_process
ENSDARG00000026348	7.37	6.845	19.02	-	-	-	-	-
ENSDARG00000026359	16.06	10.53	5.23	-	-	-	-	-
ENSDARG00000026376	14.76	18.365	33.43	-	-	-	-	-
ENSDARG00000026400	4.99	5.26	2.625	RAD51 paralog D [Source:ZFIN;Acc:ZDB-GENE-040426-2490]	ko03440//Homologous recombination	-	GO:0005524//ATP binding;GO:0003677//DNA binding;GO:0008094//DNA-dependent ATPase activity;GO:0003674//molecular_function;GO:0016887//ATPase activity;GO:0043167//ion binding	GO:0006281//DNA repair;GO:0006259//DNA metabolic process;GO:0006950//response to stress;GO:0008150//biological_process;GO:0034641//cellular nitrogen compound metabolic process
ENSDARG00000026406	6.58	9.83	4.3	annexin A5a [Source:ZFIN;Acc:ZDB-GENE-080220-29]	-	-	GO:0005509//calcium ion binding;GO:0005544//calcium-dependent phospholipid binding;GO:0003674//molecular_function;GO:0008289//lipid binding;GO:0043167//ion binding	GO:0050819//negative regulation of coagulation;GO:0008150//biological_process
ENSDARG00000026448	30.515	16.18	10.87	-	-	GO:0005575//cellular_component;GO:0005622//intracellular;GO:0005623//cell;GO:0005634//nucleus;GO:0005654//nucleoplasm;GO:0043226//organelle;GO:0043234//protein complex	-	GO:0008150//biological_process;GO:0009058//biosynthetic process;GO:0034641//cellular nitrogen compound metabolic process;GO:0030154//cell differentiation;GO:0048856//anatomical structure development
ENSDARG00000026454	8.92	10.675	3.705	MIS12 kinetochore complex component [Source:ZFIN;Acc:ZDB-GENE-040426-1372]	-	GO:0005634//nucleus;GO:0000775//chromosome, centromeric region;GO:0005575//cellular_component;GO:0005622//intracellular;GO:0005623//cell;GO:0005694//chromosome;GO:0043226//organelle	GO:0003674//molecular_function;GO:0003674//molecular_function	GO:0007067//mitosis;GO:0007049//cell cycle;GO:0008150//biological_process
ENSDARG00000026473	6.195	4.67	3.08	SIX homeobox 1b [Source:ZFIN;Acc:ZDB-GENE-040426-2308]	-	GO:0005575//cellular_component;GO:0005622//intracellular;GO:0005623//cell;GO:0005737//cytoplasm;GO:0005634//nucleus;GO:0043226//organelle	GO:0003674//molecular_function;GO:0003677//DNA binding	GO:0008150//biological_process;GO:0048856//anatomical structure development;GO:0030154//cell differentiation;GO:0009058//biosynthetic process;GO:0034641//cellular nitrogen compound metabolic process
ENSDARG00000026513	6.74	4.62	2.4	-	-	-	-	-
ENSDARG00000026540	12.535	8.74	5.06	-	-	-	-	-
ENSDARG00000026548	1.085	2.955	3.43	cytochrome P450, family 2, subfamily U, polypeptide 1 [Source:ZFIN;Acc:ZDB-GENE-070730-1]	ko01100//Metabolic pathways;ko00590//Arachidonic acid metabolism	GO:0043231//intracellular membrane-bounded organelle;GO:0005737//cytoplasm;GO:0005575//cellular_component;GO:0005622//intracellular;GO:0005623//cell;GO:0005737//cytoplasm;GO:0043226//organelle	GO:0016491//oxidoreductase activity;GO:0004497//monooxygenase activity;GO:0016705//oxidoreductase activity, acting on paired donors, with incorporation or reduction of molecular oxygen;GO:0005506//iron ion binding;GO:0046872//metal ion binding;GO:0008395//steroid hydroxylase activity;GO:0020037//heme binding;GO:0016712//oxidoreductase activity, acting on paired donors, with incorporation or reduc…	GO:0055114//oxidation-reduction process;GO:0006082//organic acid metabolic process;GO:0042738//exogenous drug catabolic process;GO:0006805//xenobiotic metabolic process;GO:0008150//biological_process;GO:0009056//catabolic process;GO:0044281//small molecule metabolic process
ENSDARG00000026577	15.7	15.915	6.73	cyclin-dependent kinase 2 [Source:ZFIN;Acc:ZDB-GENE-040426-2741]	ko05200//Pathways in cancer;ko04114//Oocyte meiosis;ko04110//Cell cycle;ko05215//Prostate cancer;ko04914//Progesterone-mediated oocyte maturation;ko05162//Measles;ko05222//Small cell lung cancer;ko04115//p53 signaling pathway	-	GO:0016301//kinase activity;GO:0000166//nucleotide binding;GO:0004672//protein kinase activity;GO:0005524//ATP binding;GO:0016740//transferase activity;GO:0016772//transferase activity, transferring phosphorus-containing groups;GO:0003674//molecular_function;GO:0043167//ion binding	GO:0006468//protein phosphorylation;GO:0016310//phosphorylation;GO:0008150//biological_process;GO:0006464//cellular protein modification process
ENSDARG00000026582	3.95	5.965	12.075	iron-sulfur cluster assembly enzyme b [Source:ZFIN;Acc:ZDB-GENE-050417-332]	-	GO:0005575//cellular_component;GO:0005575//cellular_component	GO:0005506//iron ion binding;GO:0051536//iron-sulfur cluster binding;GO:0003674//molecular_function;GO:0043167//ion binding	GO:0016226//iron-sulfur cluster assembly;GO:0008150//biological_process;GO:0009058//biosynthetic process;GO:0022607//cellular component assembly
ENSDARG00000026764	1.95	13.52	51.465	alpha-2-HS-glycoprotein 1 [Source:ZFIN;Acc:ZDB-GENE-041114-50]	-	-	GO:0004869//cysteine-type endopeptidase inhibitor activity;GO:0003674//molecular_function;GO:0030234//enzyme regulator activity	-
ENSDARG00000026766	33.905	23.5	12.24	BCL2-like 10 (apoptosis facilitator) [Source:ZFIN;Acc:ZDB-GENE-030825-2]	-	GO:0005739//mitochondrion;GO:0005741//mitochondrial outer membrane;GO:0005575//cellular_component;GO:0005622//intracellular;GO:0005623//cell;GO:0005737//cytoplasm;GO:0005739//mitochondrion;GO:0043226//organelle	GO:0042803//protein homodimerization activity;GO:0046982//protein heterodimerization activity;GO:0005515//protein binding;GO:0003674//molecular_function	GO:0007369//gastrulation;GO:0001756//somitogenesis;GO:2001243//negative regulation of intrinsic apoptotic signaling pathway;GO:0042981//regulation of apoptotic process;GO:0043066//negative regulation of apoptotic process;GO:0097192//extrinsic apoptotic signaling pathway in absence of ligand;GO:0008630//intrinsic apoptotic signaling pathway in response to DNA damage;GO:0051279//regulation of relea…
ENSDARG00000026820	17.82	5.775	13.515	guanylyl cyclase 3 [Source:ZFIN;Acc:ZDB-GENE-011128-9]	-	GO:0016020//membrane;GO:0016021//integral component of membrane;GO:0005575//cellular_component	GO:0016849//phosphorus-oxygen lyase activity;GO:0004672//protein kinase activity;GO:0016829//lyase activity;GO:0005524//ATP binding;GO:0004383//guanylate cyclase activity;GO:0000166//nucleotide binding;GO:0016772//transferase activity, transferring phosphorus-containing groups;GO:0003674//molecular_function;GO:0043167//ion binding;GO:0016301//kinase activity	GO:0006182//cGMP biosynthetic process;GO:0006468//protein phosphorylation;GO:0035556//intracellular signal transduction;GO:0009190//cyclic nucleotide biosynthetic process;GO:0008150//biological_process;GO:0009058//biosynthetic process;GO:0034641//cellular nitrogen compound metabolic process;GO:0044281//small molecule metabolic process;GO:0007165//signal transduction;GO:0006464//cellular protein m…
ENSDARG00000026882	27.94	23.09	12.855	-	-	GO:0016020//membrane;GO:0005575//cellular_component	GO:0003674//molecular_function;GO:0003674//molecular_function	GO:0008360//regulation of cell shape;GO:0008150//biological_process
ENSDARG00000026892	9.36	4.26	4.59	-	-	-	-	-
ENSDARG00000026895	0.255	0.97	1.765	torsin family 1 like 3 [Source:ZFIN;Acc:ZDB-GENE-040426-1859]	-	GO:0005783//endoplasmic reticulum;GO:0005575//cellular_component;GO:0005622//intracellular;GO:0005623//cell;GO:0005737//cytoplasm;GO:0043226//organelle	GO:0005524//ATP binding;GO:0000166//nucleotide binding;GO:0003674//molecular_function;GO:0043167//ion binding	GO:0007029//endoplasmic reticulum organization;GO:0051085//chaperone mediated protein folding requiring cofactor;GO:0006457//protein folding;GO:0008150//biological_process
ENSDARG00000026907	2.64	2.835	6.48	solute carrier family 48 (heme transporter), member 1a [Source:ZFIN;Acc:ZDB-GENE-040718-121]	-	GO:0005575//cellular_component;GO:0005622//intracellular;GO:0005623//cell;GO:0005737//cytoplasm;GO:0005768//endosome;GO:0043226//organelle;GO:0005764//lysosome;GO:0005773//vacuole	GO:0003674//molecular_function	GO:0006810//transport;GO:0008150//biological_process
ENSDARG00000026925	0.001	0.001	1.245	nitric oxide synthase 2a, inducible [Source:ZFIN;Acc:ZDB-GENE-040305-1]	ko01100//Metabolic pathways;ko05200//Pathways in cancer;ko04020//Calcium signaling pathway;ko05152//Tuberculosis;ko05145//Toxoplasmosis;ko05142//Chagas disease (American trypanosomiasis);ko05146//Amoebiasis;ko05222//Small cell lung cancer;ko04146//Peroxisome;ko05140//Leishmaniasis;ko05133//Pertussis;ko00330//Arginine and proline metabolism	GO:0005829//cytosol;GO:0005575//cellular_component;GO:0005622//intracellular;GO:0005623//cell;GO:0005737//cytoplasm;GO:0005829//cytosol	GO:0003958//NADPH-hemoprotein reductase activity;GO:0016491//oxidoreductase activity;GO:0004517//nitric-oxide synthase activity;GO:0010181//FMN binding;GO:0005506//iron ion binding;GO:0003674//molecular_function;GO:0043167//ion binding	GO:0007263//nitric oxide mediated signal transduction;GO:0045776//negative regulation of blood pressure;GO:0055114//oxidation-reduction process;GO:0006809//nitric oxide biosynthetic process;GO:0032496//response to lipopolysaccharide;GO:0009611//response to wounding;GO:0031284//positive regulation of guanylate cyclase activity;GO:0045909//positive regulation of vasodilation;GO:0006954//inflammator…
ENSDARG00000026979	12.7	11.965	4.695	-	-	GO:0005882//intermediate filament;GO:0005575//cellular_component;GO:0005622//intracellular;GO:0005623//cell;GO:0005856//cytoskeleton;GO:0043226//organelle;GO:0043234//protein complex	GO:0005198//structural molecule activity;GO:0003674//molecular_function	-
ENSDARG00000027017	1.06	1.82	4.75	-	ko04310//Wnt signaling pathway;ko04114//Oocyte meiosis;ko03015//mRNA surveillance pathway	-	-	-
ENSDARG00000027087	6.215	4.945	2.45	transforming growth factor, beta 2 [Source:ZFIN;Acc:ZDB-GENE-030723-3]	ko05200//Pathways in cancer;ko04010//MAPK signaling pathway;ko04144//Endocytosis;ko05152//Tuberculosis;ko04060//Cytokine-cytokine receptor interaction;ko04110//Cell cycle;ko05145//Toxoplasmosis;ko05142//Chagas disease (American trypanosomiasis);ko05414//Dilated cardiomyopathy;ko04380//Osteoclast differentiation;ko05146//Amoebiasis;ko05410//Hypertrophic cardiomyopathy (HCM);ko05211//Renal cell car…	GO:0005576//extracellular region;GO:0005615//extracellular space;GO:0005575//cellular_component	GO:0008083//growth factor activity;GO:0005160//transforming growth factor beta receptor binding;GO:0005125//cytokine activity;GO:0005114//type II transforming growth factor beta receptor binding;GO:0003674//molecular_function	GO:0040007//growth;GO:0007179//transforming growth factor beta receptor signaling pathway;GO:0043408//regulation of MAPK cascade;GO:0042127//regulation of cell proliferation;GO:0060022//hard palate development;GO:0048468//cell development;GO:0016049//cell growth;GO:0060395//SMAD protein signal transduction;GO:0042981//regulation of apoptotic process;GO:0010862//positive regulation of pathway-rest…
ENSDARG00000027153	1.245	2.585	0.985	gamma-aminobutyric acid (GABA) A receptor, rho 3a [Source:ZFIN;Acc:ZDB-GENE-080722-20]	ko04080//Neuroactive ligand-receptor interaction	GO:0030054//cell junction;GO:0016021//integral component of membrane;GO:0045202//synapse;GO:0016020//membrane;GO:0005886//plasma membrane;GO:0005575//cellular_component;GO:0005623//cell	GO:0005230//extracellular ligand-gated ion channel activity;GO:0003674//molecular_function;GO:0022857//transmembrane transporter activity	GO:0006810//transport;GO:0006811//ion transport;GO:0008150//biological_process
ENSDARG00000027236	131.895	50.275	37.265	-	-	GO:0005575//cellular_component;GO:0005575//cellular_component	GO:0070492//oligosaccharide binding;GO:0003674//molecular_function	-
ENSDARG00000027310	13.845	9.38	5.365	-	-	-	-	-
ENSDARG00000027360	6.92	8.255	3.135	si:ch211-106h11.3 [Source:ZFIN;Acc:ZDB-GENE-050208-296]	-	GO:0005575//cellular_component;GO:0005576//extracellular region;GO:0005578//proteinaceous extracellular matrix	GO:0003674//molecular_function;GO:0043167//ion binding	GO:0007267//cell-cell signaling;GO:0008150//biological_process;GO:0007155//cell adhesion;GO:0007165//signal transduction
ENSDARG00000027403	9.07	5.795	4.125	zinc finger, CCCH-type with G patch domain [Source:ZFIN;Acc:ZDB-GENE-040426-1248]	-	GO:0005575//cellular_component;GO:0005622//intracellular;GO:0005623//cell;GO:0005634//nucleus;GO:0043226//organelle	GO:0003674//molecular_function;GO:0003677//DNA binding;GO:0001071//nucleic acid binding transcription factor activity;GO:0043167//ion binding	GO:0008150//biological_process;GO:0009058//biosynthetic process;GO:0034641//cellular nitrogen compound metabolic process
ENSDARG00000027424	37.955	20.245	17.87	-	-	GO:0016020//membrane;GO:0016021//integral component of membrane;GO:0005575//cellular_component	-	GO:0006810//transport;GO:0008150//biological_process
ENSDARG00000027428	5.88	2.345	5.975	ribonuclease P/MRP 30 subunit [Source:ZFIN;Acc:ZDB-GENE-050320-45]	ko03013//RNA transport;ko03008//Ribosome biogenesis in eukaryotes	GO:0005655//nucleolar ribonuclease P complex;GO:0005840//ribosome;GO:0005575//cellular_component;GO:0005622//intracellular;GO:0005623//cell;GO:0005737//cytoplasm;GO:0043226//organelle;GO:0005634//nucleus;GO:0005730//nucleolus	GO:0003824//catalytic activity;GO:0004526//ribonuclease P activity;GO:0004540//ribonuclease activity;GO:0003723//RNA binding;GO:0003735//structural constituent of ribosome;GO:0003674//molecular_function;GO:0005198//structural molecule activity;GO:0003723//RNA binding;GO:0004518//nuclease activity	GO:0008033//tRNA processing;GO:0006412//translation;GO:0008150//biological_process;GO:0034641//cellular nitrogen compound metabolic process;GO:0009058//biosynthetic process;GO:0006399//tRNA metabolic process
ENSDARG00000027472	0.75	1.7	0.12	glycoprotein hormone beta 5 [Source:ZFIN;Acc:ZDB-GENE-090319-4]	-	GO:0005576//extracellular region;GO:0005575//cellular_component	GO:0005179//hormone activity;GO:0003674//molecular_function	-
ENSDARG00000027495	35.705	19.065	11.265	ELOVL fatty acid elongase 4b [Source:ZFIN;Acc:ZDB-GENE-030131-7672]	ko00062//Fatty acid elongation in mitochondria	GO:0016020//membrane;GO:0016021//integral component of membrane;GO:0005575//cellular_component	GO:0016740//transferase activity;GO:0003674//molecular_function	GO:0042761//very long-chain fatty acid biosynthetic process;GO:0006629//lipid metabolic process;GO:0006631//fatty acid metabolic process;GO:0006633//fatty acid biosynthetic process;GO:0008150//biological_process;GO:0009058//biosynthetic process;GO:0044281//small molecule metabolic process
ENSDARG00000027529	15.385	5.835	2.465	heme oxygenase 1a [Source:ZFIN;Acc:ZDB-GENE-030131-3102]	ko00860//Porphyrin and chlorophyll metabolism;ko04978//Mineral absorption	-	GO:0004392//heme oxygenase (decyclizing) activity;GO:0046872//metal ion binding;GO:0003674//molecular_function;GO:0043167//ion binding;GO:0016491//oxidoreductase activity	GO:0055114//oxidation-reduction process;GO:0006788//heme oxidation;GO:0001666//response to hypoxia;GO:0071466//cellular response to xenobiotic stimulus;GO:0008150//biological_process;GO:0006950//response to stress;GO:0009056//catabolic process;GO:0034641//cellular nitrogen compound metabolic process;GO:0051186//cofactor metabolic process
ENSDARG00000027590	63.135	42.26	26.265	septin 2 [Source:ZFIN;Acc:ZDB-GENE-030131-911]	-	-	GO:0005525//GTP binding;GO:0000166//nucleotide binding;GO:0003674//molecular_function;GO:0043167//ion binding	GO:0051301//cell division;GO:0007049//cell cycle;GO:0008150//biological_process
ENSDARG00000027618	0.225	0.135	0.605	-	-	-	-	-
ENSDARG00000027620	0.39	1.395	2.475	beta-carotene 15, 15-dioxygenase 2, like [Source:ZFIN;Acc:ZDB-GENE-010509-1]	-	GO:0005739//mitochondrion;GO:0005575//cellular_component;GO:0005622//intracellular;GO:0005623//cell;GO:0005737//cytoplasm;GO:0005739//mitochondrion;GO:0043226//organelle	GO:0051213//dioxygenase activity;GO:0010437//9,10 (9', 10')-carotenoid-cleaving dioxygenase activity;GO:0016491//oxidoreductase activity;GO:0003674//molecular_function	GO:0055114//oxidation-reduction process;GO:0008150//biological_process
ENSDARG00000027777	0.825	1.735	2.865	-	ko05162//Measles;ko04621//NOD-like receptor signaling pathway	-	GO:0003674//molecular_function;GO:0043167//ion binding	-
ENSDARG00000027826	8.775	8.78	3.95	haloacid dehalogenase-like hydrolase domain containing 1 [Source:ZFIN;Acc:ZDB-GENE-050522-36]	-	GO:0005575//cellular_component;GO:0005575//cellular_component	GO:0016787//hydrolase activity;GO:0003674//molecular_function	GO:0008152//metabolic process;GO:0008150//biological_process
ENSDARG00000028027	17.595	54.58	17.45	tripartite motif containing 63a [Source:ZFIN;Acc:ZDB-GENE-040625-139]	-	GO:0005622//intracellular;GO:0005575//cellular_component;GO:0005623//cell	GO:0046872//metal ion binding;GO:0008270//zinc ion binding;GO:0003674//molecular_function;GO:0043167//ion binding	-
ENSDARG00000028048	26.63	17.18	9.29	retinol dehydrogenase 8a [Source:ZFIN;Acc:ZDB-GENE-021115-3]	ko01100//Metabolic pathways;ko00830//Retinol metabolism	GO:0005737//cytoplasm;GO:0005575//cellular_component;GO:0005622//intracellular;GO:0005623//cell	GO:0016491//oxidoreductase activity;GO:0004303//estradiol 17-beta-dehydrogenase activity;GO:0003674//molecular_function	GO:0055114//oxidation-reduction process;GO:0006703//estrogen biosynthetic process;GO:0008152//metabolic process;GO:0008150//biological_process;GO:0006629//lipid metabolic process;GO:0009058//biosynthetic process
[truncated: 3,985 more rows]
